# Supplementary material for: Sleep and diurnal alternative polyadenylation sites associated with human APA-linked brain disorders
Source: Research Square preprint supplement (doi:10.21203/rs.3.rs-4707772/v1), 2024-08-08
Supplement: Supplementary file 1 [file b3e3a2780e19ffeb43230334.xlsx]

## Sheet: Sheet1
PAS_ID	Symbol	Chromosome	Strand	Start	End	Span	Peak	PASs/gene	major PAS	Gene Biotype	Transcript	Total	meta2d_pvalue	meta2d_pvalue	meta2d_pvalue	meta2d_pvalue	meta2d_pvalue	median AVE	meta2d_BH.Q	meta2d_BH.Q	meta2d_BH.Q	meta2d_BH.Q	meta2d_BH.Q	median BH.Q	meta2d_period	meta2d_phase	meta2d_phase	meta2d_phase	meta2d_phase	meta2d_phase	phase AVE	meta2d_Base	meta2d_Base	meta2d_Base	meta2d_Base	meta2d_Base	meta2d_AMP	meta2d_AMP	meta2d_AMP	meta2d_AMP	meta2d_AMP	AMP AVE	meta2d_rAMP	meta2d_rAMP	meta2d_rAMP	meta2d_rAMP	meta2d_rAMP	rAMP AVE
126378	LOC498154	12	+	15288991	15289079	88	15289040	4	mPAS	protein_coding		1278	8.28924e-11	1.62337e-12	8.86546e-12	1.56801e-09	8.36258e-11	8.28924e-11	2.63241e-06	5.15533e-08	2.81541e-07	1.65984e-05	2.6557e-06	2.63241e-06	12	4.52706	4.9612	6.39644	4.51705	6.51757	5.38386	230.648	230.648	230.648	230.648	230.648	102.064	104.373	80.3367	100.598	75.3249	92.5393	0.442509	0.452519	0.348309	0.436156	0.32658	0.401215
73474	Utp6	10	-	64897317	64897328	11	64897327	2	mPAS	protein_coding	XM_039087641.1	367	1.2061e-08	2.24307e-09	8.67152e-09	2.1555e-08	3.58812e-09	8.67152e-09	0.000106723	3.56166e-05	8.0384e-05	0.000171131	5.6974e-05	8.0384e-05	12	5.89192	4.56187	6.27292	4.40881	6.46364	5.51983	65.779	65.779	65.779	65.779	65.779	30.9977	35.8602	26.8282	34.8169	24.2875	30.5581	0.47124	0.545162	0.407853	0.529302	0.36923	0.464557
65189	Flywch1	10	-	12774627	12774664	37	12774649	2	mPAS	protein_coding		17345	7.92752e-09	2.38415e-08	3.59461e-08	1.22572e-10	3.38012e-08	2.38415e-08	0.000106723	0.000151427	0.000142693	3.89251e-06	0.000193018	0.000142693	12	4.085	4.60414	3.75547	3.10319	4.65067	4.03969	3302.95	3302.95	3302.95	3302.95	3302.95	835.538	747.904	880.384	872.826	745.643	816.459	0.252967	0.226435	0.266544	0.264256	0.22575	0.24719
40991	Polr2i	1	+	85484943	85484953	10	85484950	1	mPAS	protein_coding		6924	1.34425e-08	4.9156e-09	3.98704e-10	1.5075e-07	7.53744e-09	7.53744e-09	0.000106723	5.20349e-05	6.33083e-06	0.000721981	7.97888e-05	7.97888e-05	12	5.78578	5.57709	6.37975	6.43437	4.36001	5.7074	1285.2	1285.2	1285.2	1285.2	1285.2	208.207	221.432	160.094	154.827	239.864	196.885	0.162004	0.172294	0.124568	0.12047	0.186636	0.153194
545385	LOC120094630	9	+	11582398	11582402	4	11582399	1		lncRNA		215	3.38502e-08	7.76847e-08	1.59339e-08	9.63529e-08	4.28547e-08	4.28547e-08	0.000175164	0.000352433	0.000101203	0.000611976	0.000194419	0.000194419	12	4.21996	6.05544	5.11214	4.31064	5.76399	5.09243	40.1123	40.1123	40.1123	40.1123	40.1123	38.4991	21.9256	34.3975	37.8722	26.4426	31.8274	0.959784	0.546607	0.857531	0.944155	0.659216	0.793459
579246	LOC120099663	NW_023637727.1	-	48772	48783	11	48783	1		lncRNA	XR_005498794.1	68	4.41262e-08	3.2949e-08	9.18313e-08	9.99395e-10	1.4122e-07	4.41262e-08	0.000175164	0.000174394	0.00022433	1.58689e-05	0.000480605	0.000175164	12	10.3117	9.32004	9.92894	9.93261	10.334	9.96545	10.8299	10.8299	10.8299	10.8299	10.8299	14.3388	14.5089	14.7674	15.3197	14.3616	14.6593	1.324	1.3397	1.36357	1.41457	1.3261	1.35359
36937	Qk	1	+	50495100	50495100	0	50495100	10		protein_coding	in 3'UTR	59	4.21698e-08	2.97009e-07	6.84383e-08	2.14509e-07	2.92814e-08	6.84383e-08	0.000175164	0.000589508	0.000197581	0.000721981	0.000193018	0.000197581	12	10.228	10.741	10.58	8.93531	10.9058	10.278	11.1629	11.1629	11.1629	11.1629	11.1629	14.6587	13.3879	14.0507	13.2543	12.8382	13.638	1.31316	1.19932	1.25869	1.18735	1.15007	1.22172
293340	LOC120100778	2	+	100139138	100139166	28	100139141	4		lncRNA		290	3.55178e-07	1.43477e-08	4.07135e-08	3.33523e-07	2.9049e-07	2.9049e-07	0.000593651	0.00011391	0.00014366	0.00088264	0.000709621	0.000593651	12	6.73405	4.91664	5.89521	6.6183	4.7534	5.78352	54.6264	54.6264	54.6264	54.6264	54.6264	26.9082	32.9877	33.349	28.3409	31.5276	30.6227	0.492586	0.603879	0.610491	0.518813	0.577149	0.560584
502043	Endod1	8	-	11209109	11209128	19	11209123	4	mPAS	protein_coding		2934	2.00848e-07	4.41591e-07	1.11492e-07	5.60848e-07	3.97304e-07	3.97304e-07	0.000455596	0.000728547	0.000252904	0.0012722	0.000788575	0.000728547	12	4.16609	5.51477	3.39065	3.71729	4.04438	4.16664	544.616	544.616	544.616	544.616	544.616	187.387	136.314	176.8	181.353	186.656	173.702	0.344072	0.250294	0.324632	0.332991	0.34273	0.318944
96110	RGD1359290	10	+	92374265	92374303	38	92374271	2		protein_coding		959	1.12466e-07	1.68052e-07	1.01249e-08	8.65725e-07	9.61702e-07	1.68052e-07	0.000357159	0.00051016	8.0384e-05	0.00161722	0.00124695	0.00051016	12	5.80857	6.7773	5.05598	5.54363	4.78656	5.59441	182.276	182.276	182.276	182.276	182.276	103.882	85.7117	100.65	104.545	97.1179	98.3812	0.569915	0.470231	0.552184	0.573552	0.532807	0.539738
57523	-	1	+	213353095	213353099	4	213353095				-	5223	3.5253e-07	4.58826e-07	8.33412e-07	3.64774e-07	4.74326e-07	4.58826e-07	0.000593651	0.000728547	0.00080202	0.000891087	0.000858398	0.00080202	12	10.6523	10.0515	9.21723	8.76396	9.3348	9.60395	922.354	922.354	922.354	922.354	922.354	445.993	518.09	535.469	497.237	544.877	508.333	0.483537	0.561704	0.580546	0.539096	0.590746	0.551126
122716	Slc8b1	12	-	36029751	36029788	37	36029759	1	mPAS	protein_coding		179	1.78669e-07	4.85169e-07	4.97861e-07	1.01316e-06	5.26732e-07	4.97861e-07	0.00043646	0.000733691	0.000623661	0.0017875	0.000858398	0.000733691	12	5.21125	6.48595	6.24907	5.28854	4.64708	5.57638	30.024	30.024	30.024	30.024	30.024	25.5727	20.7319	22.5081	25.9338	24.2641	23.8021	0.85174	0.690509	0.749668	0.863768	0.808154	0.792768
254850	Vps9d1	19	-	51276993	51277022	29	51276999	1	mPAS	protein_coding		899	1.0117e-07	1.92774e-07	2.72387e-07	1.80621e-07	2.13939e-06	1.92774e-07	0.000356986	0.00051016	0.000480567	0.000721981	0.00199825	0.00051016	12	3.19302	4.17852	4.24857	3.10169	3.62958	3.67028	164.607	164.607	164.607	164.607	164.607	99.1219	97.5385	96.7629	99.7149	103.503	99.3282	0.602174	0.592554	0.587843	0.605776	0.628787	0.603427
178552	Loxl2	15	-	44718081	44718082	1	44718082	2		protein_coding	XM_039093153.1	1036	1.43555e-06	4.56868e-07	6.19798e-07	7.5734e-07	3.72594e-07	6.19798e-07	0.0011997	0.000728547	0.00069232	0.00150318	0.000788575	0.000788575	12	9.65044	10.1257	10.4394	10.4805	10.7928	10.2978	190.125	190.125	190.125	190.125	190.125	117.198	114.263	109.693	109.56	101.998	110.542	0.616425	0.60099	0.576952	0.576254	0.536477	0.58142
509304	Lctl	8	-	64637661	64637680	19	64637676	2		protein_coding	XM_039081498.1	98	1.75607e-06	8.5016e-07	1.09703e-06	2.6816e-07	2.52941e-07	8.5016e-07	0.00131682	0.0010384	0.000995379	0.000774177	0.000669387	0.000995379	12	7.88865	5.04915	5.90895	6.90047	7.02891	6.55523	17.3479	17.3479	17.3479	17.3479	17.3479	10.432	16.9315	19.0629	16.8901	16.7558	16.0144	0.601337	0.975993	1.09885	0.973606	0.965868	0.923132
304572	LOC691807	2	+	211057213	211057235	22	211057231	2		protein_coding		149	6.70704e-07	7.14104e-07	4.11274e-07	2.18155e-06	1.0209e-06	7.14104e-07	0.000795864	0.000985992	0.000544201	0.00277333	0.00124695	0.000985992	12	4.73416	5.26767	4.70624	5.90443	5.05239	5.13298	26.0549	26.0549	26.0549	26.0549	26.0549	32.6957	34.5621	32.4695	33.565	34.1237	33.4832	1.25488	1.32651	1.2462	1.28824	1.30968	1.2851
335747	Napb	3	-	136133038	136133079	41	136133041	4		protein_coding		9863	3.14119e-08	2.74366e-07	4.72545e-08	4.87335e-06	1.51338e-07	1.51338e-07	0.000175164	0.000589508	0.000150066	0.00340687	0.000480605	0.000480605	12	6.11204	5.61078	3.87641	5.5252	4.25336	5.07556	1938.33	1938.33	1938.33	1938.33	1938.33	349.263	501.272	724.187	522.89	734.548	566.432	0.180188	0.25861	0.373614	0.269763	0.378959	0.292227
177723	-	15	-	37765273	37765293	20	37765290				-	1868	2.36187e-07	1.27574e-07	3.18349e-08	4.95676e-06	1.4351e-07	1.4351e-07	0.000468787	0.000450153	0.000142693	0.00340687	0.000480605	0.000468787	12	5.91317	4.69498	6.24742	4.48737	6.38237	5.54506	353.597	353.597	353.597	353.597	353.597	127.089	139.663	114.429	136.638	107.747	125.113	0.359417	0.394979	0.323614	0.386422	0.304719	0.35383
325362	Cacnb4	3	-	36906900	36906920	20	36906904	5		protein_coding		3724	3.78681e-07	1.12167e-07	8.08157e-08	5.08075e-06	3.3432e-07	3.3432e-07	0.000601288	0.000445259	0.000213872	0.00340687	0.000758356	0.000601288	12	5.36306	4.63752	6.33157	6.49616	6.53943	5.87355	690.517	690.517	690.517	690.517	690.517	311.343	298.518	250.774	235.887	227.833	264.871	0.450883	0.43231	0.363168	0.341609	0.329945	0.383583
321546	Nacc2	3	-	8883429	8883450	21	8883448	3		protein_coding		633	1.67695e-07	2.91103e-06	2.98018e-07	2.80231e-06	1.8173e-07	2.98018e-07	0.00043646	0.00214889	0.000498113	0.00278103	0.000524653	0.000524653	12	5.16337	6.11691	6.76301	6.76565	5.50789	6.06337	122.316	122.316	122.316	122.316	122.316	55.1773	53.3575	44.9023	44.9118	55.9364	50.8571	0.451105	0.436227	0.3671	0.367178	0.45731	0.415784
242751	Egr1	18	+	26466704	26466769	65	26466745	1		protein_coding		8144	3.36597e-06	5.98925e-07	1.9889e-06	2.01127e-07	5.40604e-07	5.98925e-07	0.00211209	0.000864549	0.00146887	0.000721981	0.000858398	0.000864549	12	2.18626	2.03735	2.09579	2.03953	2.57196	2.18618	1524.3	1524.3	1524.3	1524.3	1524.3	652.212	655.853	646.516	664.385	650.626	653.918	0.427876	0.430264	0.424139	0.435862	0.426836	0.428996
260353	Mon1b	19	+	41625341	41625351	10	41625345	2	mPAS	protein_coding	XM_006255674.4	2238	4.68184e-07	1.96515e-06	1.89413e-06	2.27346e-07	3.3677e-06	1.89413e-06	0.00064644	0.00168668	0.00143858	0.000721981	0.00215205	0.00143858	12	4.75051	4.09657	3.57673	3.50045	4.71032	4.12692	429.442	429.442	429.442	429.442	429.442	191.859	223.173	228.006	230.116	198.279	214.287	0.446763	0.51968	0.530936	0.535849	0.461713	0.498988
414973	LOC120093072	5	-	139329372	139329396	24	139329381	1	mPAS	protein_coding	XM_039111237.1	71163	1.62274e-07	2.91794e-07	3.30221e-08	7.5237e-06	3.64678e-08	1.62274e-07	0.00043646	0.000589508	0.000142693	0.00391689	0.000193018	0.00043646	12	6.12225	6.37625	4.45619	5.15849	5.99854	5.62235	13530.9	13530.9	13530.9	13530.9	13530.9	2544.64	2199.34	3608.21	3443.56	2708.76	2900.9	0.188061	0.162542	0.266664	0.254496	0.200191	0.214391
486755	Gamt	7	+	9451350	9451367	17	9451361	2		protein_coding		8982	2.19827e-07	3.27387e-06	3.6865e-07	2.60334e-06	2.43363e-06	2.43363e-06	0.000465403	0.00231041	0.000544201	0.00277333	0.00209344	0.00209344	12	4.84617	3.95335	3.00074	4.93196	4.01244	4.14893	1700.88	1700.88	1700.88	1700.88	1700.88	713.042	787.448	704.187	694.67	801.628	740.195	0.41922	0.462965	0.414014	0.408418	0.471302	0.435184
277430	S100a1	2	-	175993919	175993933	14	175993930	1	mPAS	protein_coding		11703	4.1184e-07	2.79837e-07	2.48688e-07	6.09744e-06	2.43906e-06	4.1184e-07	0.000622337	0.000589508	0.000480567	0.00346355	0.00209344	0.000622337	12	6.15889	6.25348	4.10731	5.99567	5.18836	5.54074	2264.76	2264.76	2264.76	2264.76	2264.76	413.908	385.476	714.16	461.979	654.765	526.058	0.18276	0.170206	0.315336	0.203986	0.28911	0.23228
205027	Ocel1	16	+	18045063	18045094	31	18045074	1	mPAS	protein_coding		3890	4.31131e-07	1.26631e-06	6.8555e-07	6.53626e-06	1.35094e-06	1.26631e-06	0.000622337	0.00130963	0.000724629	0.00357883	0.00153221	0.00130963	12	6.23806	6.23839	5.83564	6.24286	4.24769	5.76053	731.502	731.502	731.502	731.502	731.502	122.579	121.98	165.005	121.869	251.925	156.672	0.167572	0.166752	0.22557	0.166601	0.344393	0.214178
165078	Grsf1	14	+	19429129	19429151	22	19429131	2		protein_coding		1880	1.69117e-06	1.38686e-06	1.78083e-07	6.87448e-06	1.70232e-06	1.69117e-06	0.00131682	0.00130963	0.000377026	0.00370022	0.0016894	0.00131682	12	4.16156	6.16507	5.63865	4.10308	4.15866	4.8454	349.903	349.903	349.903	349.903	349.903	114.455	68.0945	90.5311	113.91	112.784	99.955	0.327106	0.19461	0.258732	0.325548	0.322329	0.285665
516438	Pomgnt2	8	-	121645099	121645112	13	121645106	1	mPAS	protein_coding	XM_039081662.1	2677	1.27089e-06	1.14956e-06	2.86649e-06	2.4478e-06	4.75093e-06	2.4478e-06	0.00112821	0.00130963	0.00170686	0.00277333	0.00264693	0.00170686	12	4.58193	6.12288	5.22582	3.48025	4.54234	4.79064	493.91	493.91	493.91	493.91	493.91	267.807	147.548	239.111	254.257	273.182	236.381	0.542218	0.298734	0.484119	0.514785	0.553101	0.478591
523477	Pkm	8	+	60070745	60070755	10	60070751	2		protein_coding		297	1.75559e-06	1.3829e-06	2.46359e-06	3.62806e-06	3.38831e-06	2.46359e-06	0.00131682	0.00130963	0.00165064	0.0031232	0.00215205	0.00165064	12	10.7009	11.9999	10.7659	10.9672	10.0678	10.9004	55.8614	55.8614	55.8614	55.8614	55.8614	53.5454	32.0718	53.554	51.617	56.8205	49.5217	0.958541	0.574131	0.958695	0.924019	1.01717	0.886511
321277	Grin1	3	-	8103676	8103700	24	8103687	6	mPAS	protein_coding		25594	1.02841e-06	4.67658e-06	2.90236e-06	3.91194e-06	1.01993e-06	2.90236e-06	0.00101442	0.00280215	0.00170686	0.00324665	0.00124695	0.00170686	12	5.78287	5.86444	4.20753	4.02465	6.25366	5.22663	4786.49	4786.49	4786.49	4786.49	4786.49	1419.63	1357.74	2062.28	1990.26	1026.46	1571.27	0.296592	0.28366	0.430855	0.415809	0.214449	0.328273
11234	Ap2a1	1	-	95384291	95384328	37	95384298	1	mPAS	protein_coding	XM_006229064.4	3902	5.86414e-06	1.40183e-06	1.24582e-06	4.26387e-06	1.0033e-06	1.40183e-06	0.00293056	0.00130963	0.00104114	0.00337877	0.00124695	0.00130963	12	6.17953	5.48557	6.00807	3.08094	5.75239	5.3013	737.735	737.735	737.735	737.735	737.735	91.0769	147.993	106.598	171.58	127.294	128.908	0.123455	0.200604	0.144493	0.232577	0.172547	0.174735
117088	Pi4ka	11	+	83725045	83725061	16	83725057	5		protein_coding		3356	9.91419e-07	1.40213e-06	2.07371e-06	7.14912e-06	3.06258e-06	2.07371e-06	0.00101442	0.00130963	0.0014967	0.00378391	0.00211431	0.0014967	12	4.71709	4.43701	5.82909	4.41311	5.85382	5.05003	625.05	625.05	625.05	625.05	625.05	147.023	143.183	128.53	143.739	127.911	138.077	0.235217	0.229074	0.205632	0.229964	0.204641	0.220906
99171	-	11	-	10509364	10509365	1	10509364				-	58	4.32939e-06	4.28376e-07	5.2666e-06	1.70028e-06	3.03451e-06	3.03451e-06	0.00249979	0.000728547	0.00253411	0.00245435	0.00211431	0.00245435	12	8.31409	8.38695	7.78811	8.39368	8.18586	8.21374	10.0327	10.0327	10.0327	10.0327	10.0327	7.50196	6.95592	9.55591	7.11202	8.0377	7.8327	0.747748	0.693322	0.952472	0.708881	0.801147	0.780714
315970	Fance	20	+	6386628	6386634	6	6386631	1	mPAS	protein_coding	NM_001191718.1	724	4.7048e-06	1.2865e-06	1.16768e-06	4.46857e-06	3.78063e-06	3.78063e-06	0.00262123	0.00130963	0.00101025	0.00337877	0.00226531	0.00226531	12	5.29619	6.2124	5.90103	5.86106	5.19199	5.69253	134.991	134.991	134.991	134.991	134.991	47.7099	32.7031	38.7366	39.4424	48.5221	41.4228	0.35343	0.242261	0.286957	0.292185	0.359446	0.306856
255430	-	19	-	56066839	56066851	12	56066846				-	173	7.00429e-07	1.96188e-06	6.32216e-07	2.61121e-06	9.93181e-06	1.96188e-06	0.000795864	0.00168668	0.00069232	0.00277333	0.00395097	0.00168668	12	10.39	10.715	0.242334	11.7451	11.9458	9.00764	28.4321	28.4321	28.4321	28.4321	28.4321	29.0725	28.3899	14.3751	20.348	18.096	22.0563	1.02252	0.998516	0.505594	0.715671	0.636464	0.775754
246241	Csf1r	18	+	54590405	54590421	16	54590414	1	mPAS	protein_coding		4494	2.75677e-07	4.14589e-06	4.06753e-07	1.11609e-05	5.73426e-07	5.73426e-07	0.00051498	0.00268696	0.000544201	0.00507181	0.000867157	0.000867157	12	6.41882	4.87469	6.38443	6.35101	6.51494	6.10878	837.292	837.292	837.292	837.292	837.292	200.689	265.709	203.14	207.155	190.891	213.517	0.239688	0.317343	0.242615	0.247411	0.227986	0.255008
98600	Cadm2	11	-	4826456	4826456	0	4826456	16		protein_coding		623	1.60626e-06	1.25255e-05	5.65013e-07	1.11866e-06	1.2014e-06	1.2014e-06	0.00130795	0.00544895	0.00066456	0.00186976	0.00141307	0.00141307	12	6.18686	4.73695	4.46412	4.35781	6.12022	5.17319	119.455	119.455	119.455	119.455	119.455	23.2545	49.9026	52.974	50.7891	24.8268	40.3494	0.194672	0.417753	0.443464	0.425174	0.207834	0.337779
93133	-	10	+	76937658	76937660	2	76937658				-	582	1.91179e-06	1.03718e-05	2.69169e-06	2.40209e-06	1.67819e-06	2.40209e-06	0.00137983	0.00511181	0.00167608	0.00277333	0.0016894	0.0016894	12	6.07954	4.29166	5.12092	5.96464	6.07708	5.50677	110.954	110.954	110.954	110.954	110.954	37.0753	68.0033	60.8531	40.4901	37.1378	48.7119	0.334149	0.612894	0.548451	0.364926	0.334712	0.439026
286775	Homer1	2	+	24603200	24603213	13	24603202	9		protein_coding		1273	3.46852e-06	2.71662e-06	3.13329e-06	3.63884e-06	8.75687e-06	3.46852e-06	0.00211827	0.00214889	0.00179499	0.0031232	0.00391635	0.00214889	12	2.91643	2.42673	3.50186	3.80381	2.85094	3.09996	263.548	263.548	263.548	263.548	263.548	199.577	187.296	191.817	173.759	199.884	190.467	0.75727	0.71067	0.727823	0.659308	0.758436	0.722701
227181	LOC103694103	17	+	49102176	49102187	11	49102181	1		lncRNA		991	2.0991e-06	4.52045e-06	3.28604e-06	3.24458e-06	8.87922e-06	3.28604e-06	0.00148136	0.00276069	0.00183078	0.00312237	0.00391635	0.00276069	12	5.0917	4.28664	6.3506	5.78295	6.28585	5.55955	187.548	187.548	187.548	187.548	187.548	53.0305	52.4979	34.6872	45.1671	35.763	44.2291	0.282758	0.279918	0.184951	0.24083	0.190687	0.235829
299549	-	2	+	170535094	170535095	1	170535094				-	231	8.27344e-06	4.30541e-06	6.94484e-06	7.43452e-07	3.22042e-06	4.30541e-06	0.00364916	0.00268913	0.00306316	0.00150318	0.00215205	0.00268913	12	9.5658	8.72118	10.0468	9.37965	10.7083	9.68435	40.7329	40.7329	40.7329	40.7329	40.7329	33.9408	31.8225	32.3294	34.3744	27.6161	32.0166	0.833251	0.781248	0.793691	0.843896	0.677981	0.786013
89414	Rabep1	10	+	55665937	55665981	44	55665974	4		protein_coding		1536	1.78301e-06	1.383e-05	1.0557e-06	5.76192e-06	3.37402e-06	3.37402e-06	0.00131682	0.00571629	0.000986057	0.00345248	0.00215205	0.00215205	12	3.31661	3.28682	4.62213	2.99552	4.251	3.69442	291.957	291.957	291.957	291.957	291.957	127.063	125.151	116.491	121.907	124.188	122.96	0.435212	0.428661	0.398999	0.41755	0.425364	0.421157
111237	Olig2	11	+	30478869	30478894	25	30478885	2	mPAS	protein_coding		2127	7.46177e-06	8.34798e-06	1.90259e-06	1.32213e-06	7.52411e-06	7.46177e-06	0.00348476	0.00449334	0.00143858	0.00199938	0.00359335	0.00348476	12	0.983247	1.24927	1.78479	0.119218	2.17151	1.26161	400.853	400.853	400.853	400.853	400.853	98.3567	92.222	68.0644	112.576	47.4457	83.7329	0.245369	0.230065	0.169799	0.28084	0.118362	0.208887
278083	Hist2h2aa2	2	-	183801303	183801332	29	183801306	1		protein_coding	XM_003749350.5	876	2.25926e-06	1.82875e-07	1.48724e-05	6.46337e-06	3.01921e-06	3.01921e-06	0.00152654	0.00051016	0.0050134	0.00357883	0.00211431	0.00211431	12	4.76741	3.12009	4.28092	3.13967	2.97411	3.65644	168.945	168.945	168.945	168.945	168.945	71.0364	86.2597	81.4027	81.9163	81.2273	80.3685	0.420471	0.510579	0.48183	0.48487	0.480792	0.475708
25748	Cox8a	1	-	204402069	204402130	61	204402111	1	mPAS	protein_coding		22565	3.38545e-06	9.86645e-06	2.20471e-06	1.16161e-05	5.32569e-07	3.38545e-06	0.00211209	0.00511181	0.00155589	0.00515784	0.000858398	0.00211209	12	4.62154	4.32309	6.29272	5.53967	6.30214	5.41583	4324.2	4324.2	4324.2	4324.2	4324.2	1425.56	1395.07	926.825	1259.85	926.683	1186.8	0.32967	0.322619	0.214335	0.291349	0.214302	0.274455
450520	Ankrd9	6	-	130006142	130006155	13	130006152	1		protein_coding		453	3.39191e-06	5.18558e-06	8.16167e-06	8.93341e-06	5.12847e-06	5.18558e-06	0.00211209	0.0030496	0.00336611	0.00450315	0.00280802	0.0030496	12	2.91542	3.06791	4.2842	3.67305	2.95156	3.37843	80.3018	80.3018	80.3018	80.3018	80.3018	40.596	41.7634	34.3045	40.9418	41.5803	39.8372	0.505543	0.520081	0.427195	0.509849	0.517801	0.496094
153414	-	14	-	8572903	8572904	1	8572904				-	165	2.20662e-06	1.36872e-05	2.57053e-06	3.98713e-06	8.68148e-06	3.98713e-06	0.00152338	0.00571629	0.00165064	0.00324665	0.00391635	0.00324665	12	0.133788	10.8149	11.7737	10.8334	0.123472	6.73586	32.4553	32.4553	32.4553	32.4553	32.4553	28.347	42.9273	34.038	41.93	28.4379	35.136	0.873417	1.32266	1.04877	1.29193	0.876215	1.0826
163611	-	14	+	5793921	5793932	11	5793929				-	3460	8.01173e-06	1.19413e-06	4.92513e-06	5.08687e-06	1.28311e-05	5.08687e-06	0.00362884	0.00130963	0.00240627	0.00340687	0.0046584	0.00340687	12	9.90348	11.7806	11.824	0.14036	9.05095	8.53988	636.907	636.907	636.907	636.907	636.907	363.68	220.305	213.72	161.733	333.45	258.578	0.571009	0.345899	0.33556	0.253935	0.523546	0.40599
422042	LOC100363061	5	+	22088945	22088991	46	22088947	2		pseudogene		315	1.22037e-05	7.60355e-07	4.85377e-06	8.70268e-06	6.24617e-06	6.24617e-06	0.00425882	0.00100611	0.00240627	0.0044576	0.003306	0.003306	12	4.49596	4.1827	3.38143	6.29038	5.3037	4.73083	62.2655	62.2655	62.2655	62.2655	62.2655	38.8651	37.6533	34.1445	20.0439	33.4558	32.8325	0.624183	0.604721	0.548369	0.32191	0.537308	0.527298
436918	Srm	5	+	159029049	159029096	47	159029075	1	mPAS	protein_coding		4836	5.62149e-06	7.51028e-06	3.77493e-06	1.50653e-05	9.17539e-06	7.51028e-06	0.00293056	0.00413263	0.00199801	0.0062951	0.00393761	0.00393761	12	3.59171	4.38485	2.77209	2.73768	3.46263	3.38979	889.241	889.241	889.241	889.241	889.241	322.946	286.248	311.71	301.205	332.098	310.841	0.36317	0.321901	0.350535	0.338721	0.373462	0.349558
446325	Rtn1	6	-	90763709	90763783	74	90763736	4		protein_coding	NM_053865.1	11464	8.59377e-06	2.95051e-06	2.50281e-06	2.05098e-05	7.10919e-06	7.10919e-06	0.00365323	0.00214889	0.00165064	0.00759863	0.00357456	0.00357456	12	4.60988	6.33067	6.6501	5.7087	6.22693	5.90526	2255.87	2255.87	2255.87	2255.87	2255.87	1106.79	996.55	876.314	1135.37	1023.01	1027.61	0.490627	0.441759	0.38846	0.503296	0.453487	0.455526
226223	-	17	+	36229359	36229371	12	36229367				-	185	1.29233e-06	1.60548e-05	6.55886e-06	1.64848e-05	2.92713e-06	6.55886e-06	0.00112821	0.00599826	0.00293366	0.00662669	0.00211431	0.00293366	12	11.0481	10.5079	0.343817	11.4519	11.7874	9.02784	36.0607	36.0607	36.0607	36.0607	36.0607	31.6192	30.7117	24.2907	30.5735	28.9876	29.2365	0.876832	0.851667	0.673606	0.847834	0.803857	0.810759
492117	Gns	7	+	56923159	56923175	16	56923166	1	mPAS	protein_coding	XM_006241396.4	2605	2.86161e-06	1.56825e-06	5.51707e-06	2.48938e-05	9.36026e-06	5.51707e-06	0.00189325	0.00142294	0.00256177	0.00857532	0.00395097	0.00256177	12	4.31088	6.358	6.36778	5.68745	5.89274	5.72337	471.968	471.968	471.968	471.968	471.968	223.406	137.649	136.08	192.3	177.334	173.354	0.473349	0.291649	0.288325	0.407443	0.375733	0.3673
143750	Cntnap5b	13	+	18507824	18507825	1	18507824	5		protein_coding		49	4.50486e-06	1.49767e-05	9.60102e-06	2.70722e-06	1.43462e-05	9.60102e-06	0.00255466	0.0058718	0.00371829	0.00277333	0.00500651	0.00371829	12	10.9469	9.05544	10.2353	10.8501	10.9277	10.4031	8.83477	8.83477	8.83477	8.83477	8.83477	11.3652	11.7863	13.0769	11.5935	11.2718	11.8188	1.28642	1.33409	1.48017	1.31226	1.27585	1.33776
86637	G3bp1	10	+	39616392	39616431	39	39616396	4		protein_coding	XM_039085121.1	1012	1.18475e-05	1.21598e-05	1.55413e-05	1.18849e-06	8.13016e-06	1.18475e-05	0.00425882	0.0053633	0.0050134	0.00188715	0.00374188	0.00425882	12	6.67007	4.65603	4.65201	4.84622	6.6362	5.49211	187.477	187.477	187.477	187.477	187.477	50.4471	63.0266	64.2091	63.8011	50.8375	58.4643	0.269084	0.336183	0.34249	0.340314	0.271166	0.311847
340122	Rnf208	3	+	8059712	8059734	22	8059715	1	mPAS	protein_coding		4811	1.05413e-06	8.14416e-07	7.07355e-07	4.7167e-05	1.61444e-06	1.05413e-06	0.00101442	0.00103454	0.000724629	0.0132556	0.0016894	0.00103454	12	5.9936	6.29883	6.03186	5.89891	6.07661	6.05996	880.08	880.08	880.08	880.08	880.08	437	355.837	427.404	460.671	415.773	419.337	0.496546	0.404324	0.485642	0.523442	0.472427	0.476476
167600	Cox7a2l2	14	+	51301575	51301604	29	51301598	1	mPAS	protein_coding	XM_003751367.4	5841	7.14758e-06	1.51974e-05	1.75248e-06	2.05776e-05	7.6943e-06	7.6943e-06	0.00343918	0.00588565	0.00139134	0.00759863	0.00359335	0.00359335	12	6.2698	5.4537	6.30178	4.22505	6.28722	5.70751	1085.46	1085.46	1085.46	1085.46	1085.46	324.06	485.739	314.986	555.485	319.571	399.968	0.298545	0.447494	0.290186	0.511748	0.294409	0.368476
391626	Grid2	4	+	93857912	93857929	17	93857915	6		protein_coding		307	1.13552e-05	1.40734e-05	1.51746e-05	2.67623e-06	9.953e-06	1.13552e-05	0.00414491	0.00571629	0.0050134	0.00277333	0.00395097	0.00414491	12	0.479356	10.9705	11.8168	10.9275	10.6687	8.97257	58.1077	58.1077	58.1077	58.1077	58.1077	21.3901	29.8412	27.1351	29.6996	29.265	27.4662	0.368111	0.513549	0.46698	0.511113	0.503633	0.472677
480987	LOC108348051	7	-	108364373	108364402	29	108364388	4		protein_coding		2243	1.21794e-05	6.11135e-06	1.58952e-05	6.10759e-06	1.3202e-05	1.21794e-05	0.00425882	0.00352869	0.0050134	0.00346355	0.0046584	0.00425882	12	4.58513	3.99341	2.99214	3.22023	4.94115	3.94641	415.006	415.006	415.006	415.006	415.006	211.52	224.374	198.155	206.483	198.524	207.811	0.509679	0.540653	0.477474	0.497542	0.478364	0.500742
511225	Tmem30a	8	-	80728740	80728763	23	80728756	4	mPAS	protein_coding		3718	1.31448e-06	1.41162e-05	3.35516e-06	3.22919e-05	4.5221e-06	4.5221e-06	0.00112821	0.00571629	0.00183707	0.0104642	0.0025958	0.0025958	12	9.90193	9.83547	9.02767	9.59795	10.2355	9.7197	682.92	682.92	682.92	682.92	682.92	178.712	181.224	179.982	180.384	167.524	177.565	0.261688	0.265367	0.263547	0.264137	0.245306	0.260009
466582	Evl	6	+	127594321	127594370	49	127594344	4	mPAS	protein_coding		13188	9.59877e-06	2.97734e-06	2.59005e-07	3.85998e-05	4.5774e-06	4.5774e-06	0.00386427	0.00214889	0.000480567	0.0117226	0.0025958	0.0025958	12	6.16789	6.23967	4.53491	6.31319	4.51958	5.55505	2451.15	2451.15	2451.15	2451.15	2451.15	377.704	368.569	436.435	356.016	440.827	395.91	0.154093	0.150366	0.178053	0.145245	0.179845	0.16152
29833	Ndufb8	1	-	243408643	243408672	29	243408656	1	mPAS	protein_coding		15635	1.80026e-05	1.03445e-05	1.17704e-06	2.37696e-05	2.86942e-06	1.03445e-05	0.00523265	0.00511181	0.00101025	0.00857532	0.00211431	0.00511181	12	6.31267	4.63308	5.96837	4.26669	6.22732	5.48163	2896.11	2896.11	2896.11	2896.11	2896.11	489.921	750.923	588.612	761.925	519.836	622.243	0.169165	0.259286	0.203242	0.263085	0.179494	0.214855
258776	Pard6a	19	+	33591891	33591907	16	33591900	1	mPAS	protein_coding	XM_006255490.4	2991	8.34474e-07	3.48559e-05	1.3106e-05	5.57852e-06	1.92117e-06	5.57852e-06	0.000905386	0.0105421	0.004784	0.00340687	0.00184881	0.00340687	12	2.95474	4.10552	2.24817	2.47696	2.46239	2.84956	562.287	562.287	562.287	562.287	562.287	123.323	85.5512	128.844	132.527	131.184	120.286	0.219324	0.152149	0.229142	0.235693	0.233304	0.213922
414034	Cap1	5	-	135165660	135165661	1	135165661	4		protein_coding		840	1.00691e-05	1.02035e-05	5.75192e-06	4.433e-06	2.59715e-05	1.00691e-05	0.00394772	0.00511181	0.00260948	0.00337877	0.0077809	0.00394772	12	10.1682	0.0657703	10.614	0.194865	11.9799	6.60455	154.151	154.151	154.151	154.151	154.151	141.146	70.4428	135.474	62.3538	75.8215	97.0476	0.915637	0.456973	0.878839	0.404498	0.491866	0.629562
458558	Nrcam	6	+	61698508	61698545	37	61698536	8	mPAS	protein_coding		7897	1.25075e-05	2.28327e-05	7.34681e-07	2.51127e-05	1.70144e-06	1.25075e-05	0.00431741	0.00788152	0.000729102	0.00857532	0.0016894	0.00431741	12	11.3899	0.325883	0.388655	0.189342	10.2953	4.51782	1472.71	1472.71	1472.71	1472.71	1472.71	215.437	148.581	143.148	160.584	227.848	179.119	0.146286	0.10089	0.097201	0.10904	0.154714	0.121626
170793	Prr14l	14	+	77936502	77936525	23	77936515	2		protein_coding		569	7.0171e-07	4.6826e-05	3.36043e-07	3.48798e-06	1.21646e-05	3.48798e-06	0.000795864	0.012189	0.000533586	0.0031232	0.00459894	0.0031232	12	9.37764	10.092	8.80108	8.99751	8.56623	9.16689	104.682	104.682	104.682	104.682	104.682	45.1357	38.1853	45.1351	44.5591	41.9323	42.9895	0.431168	0.364773	0.431162	0.42566	0.400567	0.410666
518370	Prkcsh	8	+	20546482	20546499	17	20546490	1	mPAS	protein_coding	XM_006242634.1	7323	7.82483e-06	2.40604e-05	1.04348e-05	1.10553e-05	1.24836e-05	1.10553e-05	0.00360135	0.00821598	0.0039925	0.00507181	0.0046584	0.0046584	12	2.87383	3.02705	4.37904	3.97025	3.245	3.49904	1363.78	1363.78	1363.78	1363.78	1363.78	333.295	336.6	341.517	357.738	359.675	345.765	0.244391	0.246814	0.25042	0.262314	0.263734	0.253534
393514	Rtkn	4	+	115657936	115657959	23	115657951	1	mPAS	protein_coding	XM_039107323.1	8298	6.54782e-07	1.10135e-05	1.68031e-06	5.04406e-05	2.84274e-06	2.84274e-06	0.000795864	0.00517543	0.00136824	0.013691	0.00211431	0.00211431	12	5.72902	6.06397	6.13205	4.15106	6.21211	5.65764	1549.68	1549.68	1549.68	1549.68	1549.68	347.967	294.912	282.49	442.105	267.482	326.991	0.224542	0.190306	0.182289	0.285288	0.172605	0.211006
369084	-	4	-	69404672	69404683	11	69404677				-	1629	1.02253e-05	2.47583e-05	2.17811e-05	1.11795e-05	2.95869e-06	1.11795e-05	0.00396004	0.00836436	0.00622848	0.00507181	0.00211431	0.00507181	12	8.87138	8.86776	9.42075	8.8649	9.08588	9.02213	301.731	301.731	301.731	301.731	301.731	171.022	171.242	188.237	175.793	184.162	178.091	0.566804	0.567533	0.623858	0.582614	0.61035	0.590232
540316	Tns1	9	-	75491880	75491896	16	75491888	1	mPAS	protein_coding	XM_039083333.1	745	1.07642e-05	2.77537e-06	1.53881e-05	3.42475e-05	9.4633e-06	1.07642e-05	0.00402162	0.00214889	0.0050134	0.0108117	0.00395097	0.00402162	12	6.33581	4.28696	5.67724	4.30247	5.95029	5.31055	143.254	143.254	143.254	143.254	143.254	48.5059	73.0591	65.1812	72.775	59.0635	63.7169	0.338601	0.509997	0.455004	0.508014	0.412299	0.444783
445731	-	6	-	85641148	85641149	1	85641148				-	303	9.07018e-06	5.43522e-05	4.0204e-06	5.36847e-06	6.04542e-07	5.36847e-06	0.00379002	0.0134849	0.00209305	0.00340687	0.000872656	0.00340687	12	8.63528	9.7082	9.23531	9.70711	8.67333	9.19185	57.2785	57.2785	57.2785	57.2785	57.2785	30.7387	28.8567	31.537	29.6935	31.2759	30.4204	0.536653	0.503798	0.550591	0.518407	0.546032	0.531096
4687	Agpat4	1	-	48527313	48527358	45	48527350	2		protein_coding		4193	1.49156e-05	7.54772e-06	5.56608e-06	5.4022e-06	4.66664e-05	7.54772e-06	0.00488324	0.00413263	0.00256177	0.00340687	0.0114867	0.00413263	12	3.32699	3.04317	3.0451	3.09096	3.06689	3.11462	773.393	773.393	773.393	773.393	773.393	209.626	200.479	206.683	197.209	203.363	203.472	0.271047	0.259221	0.267242	0.254992	0.262948	0.26309
422783	Cnbd1	5	+	32559805	32559806	1	32559805	3		protein_coding	XM_017593701.2	1003	8.49307e-06	1.39645e-05	2.54738e-05	2.84904e-05	3.73934e-06	1.39645e-05	0.00365323	0.00571629	0.00674143	0.00942469	0.00226531	0.00571629	12	10.5666	9.4692	9.93025	10.0333	8.90223	9.78032	176.16	176.16	176.16	176.16	176.16	110.046	122.329	121.145	119.263	113.643	117.285	0.624696	0.69442	0.687699	0.677017	0.645111	0.665789
315797	Pacsin1	20	+	5765321	5765349	28	5765324	7		protein_coding		310	1.4686e-05	3.5115e-06	4.02411e-07	5.46252e-05	1.13468e-05	1.13468e-05	0.00487761	0.00237265	0.000544201	0.0144561	0.00439439	0.00439439	12	5.12729	6.01896	5.74749	4.67345	4.55267	5.22397	55.4336	55.4336	55.4336	55.4336	55.4336	33.0765	28.8968	30.6931	32.2342	31.3268	31.2455	0.596687	0.521287	0.553691	0.581492	0.565123	0.563656
61328	Ina	1	+	245907784	245907869	85	245907817	3		protein_coding		3861	1.24117e-06	6.08267e-05	2.79685e-06	2.00539e-05	2.76666e-06	2.79685e-06	0.00112821	0.0142194	0.00170686	0.00759863	0.00211431	0.00211431	12	10.945	11.7182	11.3105	10.9774	11.2553	11.2413	715.467	715.467	715.467	715.467	715.467	235.23	211.246	229.844	232.787	229.19	227.659	0.328777	0.295255	0.321249	0.325364	0.320336	0.318196
469065	Rab5b	7	-	1109444	1109477	33	1109471	3	mPAS	protein_coding		3707	7.31779e-06	1.16702e-05	4.8406e-06	6.17564e-05	4.01382e-06	7.31779e-06	0.00346852	0.00529444	0.00240627	0.0154264	0.0023605	0.00346852	12	6.61887	6.79094	6.21664	6.70541	6.37198	6.54077	710.743	710.743	710.743	710.743	710.743	243.341	231.918	271.017	237.039	261.467	248.956	0.342376	0.326304	0.381315	0.333508	0.367878	0.350276
218787	Wac	17	-	55932913	55932923	10	55932917	4		protein_coding	XM_039095733.1	351	2.61172e-05	2.30971e-06	3.32052e-05	9.89594e-06	1.9774e-05	1.9774e-05	0.00670038	0.00193025	0.00823827	0.00483485	0.00634308	0.00634308	12	9.89246	9.17524	10.4339	8.98955	9.23866	9.54596	63.4585	63.4585	63.4585	63.4585	63.4585	57.3889	56.1176	53.0395	54.3759	55.4926	55.2829	0.904353	0.884319	0.835814	0.856872	0.87447	0.871166
119969	Taf6	12	-	17055860	17055869	9	17055865	3	mPAS	protein_coding	NM_001044225.1	2273	8.62777e-06	1.48395e-05	1.61025e-05	2.67605e-05	2.64628e-05	1.61025e-05	0.00365323	0.0058718	0.0050134	0.00894561	0.007854	0.0058718	12	4.34683	2.65436	3.8927	3.78454	4.03282	3.74225	419.555	419.555	419.555	419.555	419.555	116.94	130.054	130.827	135.481	127.623	128.185	0.278724	0.309981	0.311824	0.322917	0.304186	0.305526
351820	B2m	3	+	109100519	109100575	56	109100553	4		protein_coding		5057	4.32017e-06	2.46693e-06	7.25289e-06	6.61636e-05	1.26951e-05	7.25289e-06	0.00249979	0.00200878	0.00315521	0.0161178	0.0046584	0.00315521	12	5.37629	6.12273	5.9862	4.12774	5.96066	5.51472	951.304	951.304	951.304	951.304	951.304	366.42	255.247	278.772	421.628	283.277	321.069	0.385176	0.268312	0.293042	0.44321	0.297778	0.337504
499812	Ccdc184	7	+	129301956	129301966	10	129301959	2	mPAS	protein_coding	XM_017595062.2	4243	5.74246e-07	1.14863e-05	2.59886e-06	7.62108e-05	2.37675e-06	2.59886e-06	0.000759846	0.00528654	0.00165064	0.0175379	0.00209344	0.00209344	12	6.08187	4.25038	4.77444	5.87075	6.26717	5.44892	811.507	811.507	811.507	811.507	811.507	185.938	269.824	268.238	205.925	165.273	219.04	0.229127	0.332497	0.330543	0.253757	0.203661	0.269917
447876	Aldh6a1	6	-	104077958	104078002	44	104077991	2	mPAS	protein_coding		1854	4.20573e-06	7.59522e-05	7.7927e-06	2.48624e-06	5.24292e-06	5.24292e-06	0.00249979	0.0164206	0.00325622	0.00277333	0.00282203	0.00282203	12	8.35918	8.4515	7.1837	8.22146	8.13288	8.06974	342.907	342.907	342.907	342.907	342.907	71.6278	67.4218	99.2437	72.7793	76.2707	77.4687	0.208884	0.196618	0.289419	0.212242	0.222424	0.225917
196860	Homer3	16	-	19132170	19132197	27	19132182	2	mPAS	protein_coding	XM_039094431.1	2750	8.55294e-07	3.99249e-06	5.10602e-07	8.84445e-05	2.56144e-06	2.56144e-06	0.000905386	0.00264145	0.000623661	0.0193706	0.00211431	0.00211431	12	4.68507	6.47047	6.41657	5.6999	5.23254	5.70091	502.117	502.117	502.117	502.117	502.117	187.384	161.903	165.095	193.537	197.589	181.102	0.373189	0.322442	0.328798	0.385441	0.393512	0.360676
243355	Pcdhb5	18	+	29031659	29031665	6	29031662	1		protein_coding	XM_039096709.1	234	5.76661e-06	1.42201e-05	2.26329e-05	4.96193e-05	7.67805e-06	1.42201e-05	0.00293056	0.00571629	0.00626184	0.0135841	0.00359335	0.00571629	12	6.51594	6.55866	6.35457	4.53461	5.47603	5.88796	45.3477	45.3477	45.3477	45.3477	45.3477	33.8762	32.8459	36.0204	43.5856	45.0505	38.2757	0.747034	0.724314	0.794317	0.961143	0.993448	0.844051
281697	LOC103691697	2	-	216164069	216164089	20	216164071	2	mPAS	protein_coding	XM_039104063.1	1081	1.1054e-05	3.40165e-05	4.19092e-06	3.50206e-05	1.94798e-05	1.94798e-05	0.00408187	0.0103871	0.00214663	0.0109034	0.00631244	0.00631244	12	6.09432	6.12175	6.15307	6.25258	6.15808	6.15596	205.12	205.12	205.12	205.12	205.12	100.896	99.0721	96.4048	90.3784	96.1539	96.581	0.491886	0.482995	0.469991	0.440611	0.468768	0.47085
524401	Csnk1g1	8	+	66577234	66577244	10	66577241	2	mPAS	protein_coding		273	8.1131e-06	4.00235e-05	1.39632e-05	4.9245e-05	7.36553e-06	1.39632e-05	0.00362884	0.0111494	0.00487286	0.0135841	0.00359335	0.00487286	12	11.9618	10.699	0.112875	10.8368	10.5287	8.82782	49.5723	49.5723	49.5723	49.5723	49.5723	16.5216	23.4777	15.1013	23.2712	24.1894	20.5122	0.333282	0.473605	0.304631	0.46944	0.487961	0.413784
77571	Aarsd1	10	-	86342604	86342635	31	86342620	1		protein_coding		5568	1.58044e-05	3.13597e-05	2.53726e-06	6.53739e-05	7.12635e-06	1.58044e-05	0.0050697	0.00969693	0.00165064	0.0160936	0.00357456	0.0050697	12	6.04153	4.60848	6.25547	6.26586	6.30069	5.8944	1042.74	1042.74	1042.74	1042.74	1042.74	309.511	443.855	271.823	269.43	264.852	311.894	0.296823	0.42566	0.260681	0.258385	0.253995	0.299109
398780	Nop2	4	+	157944458	157944466	8	157944461	1	mPAS	protein_coding	NM_001191785.1	1305	6.46459e-06	2.75545e-05	3.08218e-05	2.44101e-05	3.30054e-05	2.75545e-05	0.0031584	0.00883887	0.00783046	0.00857532	0.00926213	0.00857532	12	6.12166	2.90431	5.89132	3.50492	4.15079	4.5146	246.8	246.8	246.8	246.8	246.8	40.2328	102.014	52.7501	114.607	114.151	84.7508	0.163018	0.413345	0.213736	0.46437	0.462524	0.343398
433759	RGD1563072	5	+	138904426	138904495	69	138904437	2		protein_coding		1772	2.25448e-05	1.08977e-05	2.27514e-05	5.99394e-05	6.36707e-06	2.25448e-05	0.00611964	0.00517543	0.00626184	0.0152489	0.00331474	0.00611964	12	0.118024	10.8487	0.32928	10.6533	10.8606	6.56197	321.922	321.922	321.922	321.922	321.922	81.1256	123.299	70.3017	124.797	123.59	104.623	0.252004	0.38301	0.218381	0.387663	0.383915	0.324994
412863	Uqcrh	5	-	129546038	129546063	25	129546053	4		protein_coding		20919	9.6129e-06	7.70437e-05	2.08694e-05	2.452e-06	1.63489e-05	1.63489e-05	0.00386427	0.0164206	0.00608027	0.00277333	0.00546518	0.00546518	12	3.52531	3.98847	4.67042	4.40347	2.7323	3.86399	4042.98	4042.98	4042.98	4042.98	4042.98	1254.96	1198.08	1025.96	1132.31	1172.38	1156.74	0.310404	0.296337	0.253763	0.280068	0.289979	0.28611
321140	Ehmt1	3	-	7580678	7580709	31	7580703	4	mPAS	protein_coding	XM_039105343.1	988	1.81249e-05	1.81091e-05	1.33119e-05	5.45706e-05	2.44251e-05	1.81249e-05	0.00523265	0.00646006	0.00480394	0.0144561	0.00756499	0.00646006	12	6.56125	5.6302	4.87982	6.19478	6.85181	6.02357	184.608	184.608	184.608	184.608	184.608	79.769	86.2969	78.0326	84.7302	73.2348	80.4127	0.432099	0.46746	0.422693	0.458973	0.396704	0.435586
24658	Ankrd13d	1	-	201565709	201565737	28	201565713	2	mPAS	protein_coding		3284	9.86481e-06	1.10819e-05	2.33163e-05	2.03038e-05	6.48253e-05	2.03038e-05	0.00391596	0.00517543	0.00627505	0.00759863	0.013979	0.00627505	12	5.47878	6.12275	5.83458	4.03526	5.89449	5.47317	602.494	602.494	602.494	602.494	602.494	161.469	109.397	135.442	213.066	130.33	149.941	0.268001	0.181574	0.224803	0.35364	0.216318	0.248867
381393	Smarcd3	4	+	10580318	10580338	20	10580329	2	mPAS	protein_coding		6762	1.56096e-05	3.94746e-05	3.68394e-06	5.32183e-05	2.14227e-05	2.14227e-05	0.00505831	0.0111494	0.0019829	0.0143225	0.00680322	0.00680322	12	3.43438	5.8291	3.40149	2.99359	4.92538	4.11679	1285.44	1285.44	1285.44	1285.44	1285.44	333.749	195.176	332.262	300.915	303.953	293.211	0.259638	0.151836	0.258482	0.234095	0.236459	0.228102
71664	Rnasek	10	-	54954900	54954927	27	54954905	1	mPAS	protein_coding		34652	5.81639e-06	3.77901e-05	1.82906e-05	4.64932e-05	2.69594e-05	2.69594e-05	0.00293056	0.01091	0.00542856	0.0131829	0.00790167	0.00790167	12	4.57746	6.18892	6.07765	4.16973	6.27881	5.45851	6623.32	6623.32	6623.32	6623.32	6623.32	2633.99	1545.86	1662.72	2643.71	1436.29	1984.51	0.397683	0.233396	0.25104	0.399152	0.216854	0.299625
28456	Atad1	1	-	230544579	230544598	19	230544594	3		protein_coding	XM_039080662.1	1159	1.29189e-05	3.77182e-05	1.58586e-05	1.69174e-05	5.54905e-05	1.69174e-05	0.00441146	0.01091	0.0050134	0.00671558	0.0128629	0.00671558	12	6.34497	4.65644	6.32965	4.23465	5.08295	5.32973	212.771	212.771	212.771	212.771	212.771	51.8789	84.2052	52.2393	83.1574	82.2679	70.7497	0.243825	0.395755	0.245518	0.39083	0.386649	0.332515
470644	Marchf2	7	-	14481736	14481773	37	14481767	3		protein_coding		3552	1.7204e-05	1.91269e-05	3.16527e-06	9.37997e-05	9.63228e-06	1.7204e-05	0.00523265	0.00667486	0.00179499	0.0204027	0.00395097	0.00523265	12	0.55551	0.350019	11.182	0.292112	11.9766	4.87125	676.096	676.096	676.096	676.096	676.096	136.595	148.18	181.278	152.039	165.655	156.749	0.202035	0.21917	0.268125	0.224877	0.245017	0.231845
322023	Zdhhc12	3	-	13363499	13363513	14	13363503	1	mPAS	protein_coding	XM_039105583.1	857	1.7769e-05	3.64705e-05	1.22726e-05	7.50248e-05	1.31605e-05	1.7769e-05	0.00523265	0.0108242	0.00453189	0.017391	0.0046584	0.00523265	12	10.3706	8.55607	9.96393	9.88673	10.4025	9.83596	151.933	151.933	151.933	151.933	151.933	56.9948	68.7516	64.9084	64.6138	55.3725	62.1282	0.375132	0.452514	0.427218	0.425279	0.364454	0.40892
367522	LOC120102486	4	-	59983401	59983401	0	59983401	1		lncRNA		279	1.04494e-05	6.49776e-05	2.87801e-05	5.50863e-05	9.10875e-06	2.87801e-05	0.0039898	0.0148453	0.00743064	0.0144576	0.00393761	0.00743064	12	8.76719	8.79684	9.92093	9.767	10.6867	9.58773	51.8518	51.8518	51.8518	51.8518	51.8518	29.243	28.2042	30.6349	30.1263	25.5436	28.7504	0.563973	0.543938	0.590815	0.581008	0.492626	0.554472
96498	Arsg	10	+	94542863	94542864	1	94542864	3		protein_coding		103	5.90597e-06	3.14508e-05	1.49515e-05	0.000104146	1.52162e-05	1.52162e-05	0.00293056	0.00969693	0.0050134	0.0216167	0.00519593	0.00519593	12	6.76237	6.7117	6.45029	6.7944	4.83621	6.311	21.684	21.684	21.684	21.684	21.684	18.4287	18.5948	20.1289	18.1335	20.9834	19.2539	0.84988	0.857537	0.928284	0.836264	0.967691	0.887931
572714	LOC102555331	X	+	68521176	68521182	6	68521179	1		lncRNA		1315	4.33643e-05	4.23226e-05	7.68597e-06	7.72389e-05	3.48809e-06	4.23226e-05	0.00921791	0.0113902	0.00325445	0.0176466	0.00217198	0.00921791	12	6.05519	6.08037	4.08619	4.776	3.31411	4.86237	251.321	251.321	251.321	251.321	251.321	47.3444	46.3728	86.2311	84.1248	78.9183	68.5983	0.188382	0.184516	0.343111	0.33473	0.314014	0.27295
480977	Vps28	7	-	108341986	108342020	34	108341991	1	mPAS	protein_coding	NM_001130492.1	5535	3.77289e-05	3.38414e-06	1.47313e-05	0.000110112	1.66713e-05	1.66713e-05	0.00849757	0.00233631	0.0050134	0.0222728	0.0055149	0.0055149	12	0.137776	10.7408	0.265444	10.8954	11.2303	6.65394	1016.56	1016.56	1016.56	1016.56	1016.56	214.783	370.585	194.475	372.935	336.404	297.836	0.211284	0.364548	0.191307	0.36686	0.330924	0.292985
262296	Ntpcr	19	+	53715197	53715267	70	53715259	3	mPAS	protein_coding		1202	4.11227e-05	7.47291e-05	1.3715e-05	3.8759e-05	1.45679e-05	3.8759e-05	0.00906898	0.0163667	0.00487286	0.0117226	0.00502863	0.00906898	12	4.27159	6.147	4.45761	4.69709	3.34524	4.5837	233.993	233.993	233.993	233.993	233.993	104.291	40.0082	103.567	96.086	104.233	89.6371	0.4457	0.17098	0.442608	0.410635	0.445454	0.383075
369581	Tmem176b	4	-	77766929	77766954	25	77766950	1	mPAS	protein_coding		6931	4.00079e-05	3.98148e-05	1.91461e-05	6.71717e-05	2.7121e-05	3.98148e-05	0.00888483	0.0111494	0.00562984	0.0161604	0.00790167	0.00888483	12	6.38239	4.59655	5.53193	4.34328	4.25198	5.02123	1283.6	1283.6	1283.6	1283.6	1283.6	223.184	364.857	325.983	366.967	357.128	327.624	0.173874	0.284247	0.253961	0.28589	0.278225	0.255239
78852	RGD1565033	10	-	91974934	91974966	32	91974947	3		protein_coding	XM_039086648.1	94	1.77878e-05	1.70211e-05	8.65382e-05	1.6426e-05	5.94006e-05	1.77878e-05	0.00523265	0.00621309	0.0153976	0.00662669	0.0131915	0.00662669	12	6.56417	6.50817	4.92009	5.25838	6.57629	5.96542	15.3603	15.3603	15.3603	15.3603	15.3603	13.0281	12.9989	18.1936	18.1988	12.8062	15.0451	0.848165	0.846268	1.18445	1.18479	0.833723	0.97948
415809	Stx12	5	-	145064125	145064137	12	145064134	4		protein_coding		5282	1.88421e-05	9.73524e-05	4.63254e-05	3.6242e-06	3.14627e-05	3.14627e-05	0.00534257	0.0194441	0.0102538	0.0031232	0.00892107	0.00892107	12	2.81612	4.57868	4.7276	3.04036	3.46867	3.72628	984.528	984.528	984.528	984.528	984.528	325.607	300.819	292.628	351.275	363.747	326.815	0.330724	0.305547	0.297226	0.356796	0.369464	0.331951
265791	NEWGENE_1310139	2	-	34425363	34425397	34	34425386	6		protein_coding		48	3.17811e-05	4.15811e-05	2.43942e-05	5.56134e-05	4.64859e-05	4.15811e-05	0.00753188	0.0112995	0.00650997	0.0144764	0.0114867	0.0112995	12	9.73654	10.0967	9.41393	10.5114	8.87604	9.7269	7.70493	7.70493	7.70493	7.70493	7.70493	10.6513	10.0589	10.9938	9.15277	10.466	10.2645	1.3824	1.30551	1.42685	1.18791	1.35835	1.3322
333918	Lzts3	3	-	117850284	117850298	14	117850287	2	mPAS	protein_coding		612	4.97987e-05	1.55263e-05	5.27316e-05	6.21778e-05	2.45361e-05	4.97987e-05	0.00994628	0.00591303	0.0113918	0.0154264	0.00756499	0.00994628	12	0.348823	11.2417	10.9796	0.113429	11.2654	6.7898	114.287	114.287	114.287	114.287	114.287	58.693	95.6048	99.9113	68.6499	94.3025	83.4323	0.513557	0.836531	0.874213	0.600679	0.825136	0.730024
31694	-	1	-	259502172	259502173	1	259502173				-	61	2.30014e-05	8.35773e-05	3.82752e-05	5.12677e-06	5.86659e-05	3.82752e-05	0.00613829	0.0173475	0.00898811	0.00340687	0.0131794	0.00898811	12	7.02207	6.55158	7.44437	6.599	7.78824	7.08105	11.2193	11.2193	11.2193	11.2193	11.2193	11.5907	11.8593	10.3295	11.9526	9.25721	10.9979	1.03311	1.05705	0.920689	1.06537	0.825115	0.980264
417005	Micos10	5	-	151339170	151339186	16	151339178	2		protein_coding		1397	1.67136e-05	7.00037e-06	3.73935e-05	4.53876e-05	0.000105239	3.73935e-05	0.00520368	0.00396984	0.0089446	0.0129853	0.0190029	0.0089446	12	4.71932	6.30218	4.46324	5.38712	5.29707	5.23379	258.69	258.69	258.69	258.69	258.69	66.7753	52.6184	65.6193	66.319	67.9089	63.8482	0.258128	0.203403	0.25366	0.256364	0.262511	0.246813
297609	Kcnab1	2	+	149602642	149602652	10	149602652	5		protein_coding	NM_017303.2	95	3.02085e-05	5.81232e-05	1.38544e-05	9.68825e-05	1.30162e-05	3.02085e-05	0.0072865	0.0140902	0.00487286	0.0207691	0.0046584	0.0072865	12	0.267698	1.60092	0.262521	1.65646	0.58948	0.875417	17.2746	17.2746	17.2746	17.2746	17.2746	14.9535	13.7414	14.9387	13.3684	15.277	14.4558	0.865634	0.795467	0.864778	0.773875	0.884363	0.836823
147186	-	13	+	60307903	60307911	8	60307904				-	19725	2.29502e-05	7.68037e-05	6.78751e-05	1.16939e-05	3.32488e-05	3.32488e-05	0.00613829	0.0164206	0.0131982	0.00515784	0.00926213	0.00926213	12	8.76164	9.78111	9.31426	9.36081	10.3218	9.50793	3619.51	3619.51	3619.51	3619.51	3619.51	1560.16	1567.34	1635.16	1677.37	1417.31	1571.47	0.431042	0.433026	0.451762	0.463425	0.391576	0.434166
483710	Zcrb1	7	-	124525208	124525231	23	124525223	3	mPAS	protein_coding		166	4.8931e-05	1.56405e-05	3.92723e-05	3.33943e-05	9.58483e-05	3.92723e-05	0.00989747	0.00591303	0.00910344	0.0107121	0.018011	0.00989747	12	6.68739	6.99525	8.08162	6.41093	8.12464	7.25997	29.9984	29.9984	29.9984	29.9984	29.9984	20.208	18.6599	9.71827	21.0688	9.24145	15.7793	0.673635	0.622031	0.32396	0.702331	0.308065	0.526004
53260	Tufm	1	+	181077363	181077395	32	181077392	1	mPAS	protein_coding		6667	7.97657e-05	4.75495e-05	2.23079e-05	3.05133e-05	5.32687e-05	4.75495e-05	0.014475	0.0122767	0.00626184	0.00998979	0.0125308	0.0122767	12	5.98478	4.15881	4.19674	6.23803	5.01832	5.11934	1225.96	1225.96	1225.96	1225.96	1225.96	193.499	295.616	302.269	162.359	276.114	245.971	0.157834	0.24113	0.246556	0.132434	0.225222	0.200635
424204	-	5	+	51856025	51856027	2	51856025				-	110	5.43363e-06	0.000118116	3.41179e-05	2.65802e-05	7.03327e-05	3.41179e-05	0.00293056	0.0214321	0.00835568	0.00894561	0.0146944	0.00894561	12	8.09987	8.13395	6.99983	6.81947	7.89032	7.58869	21.4303	21.4303	21.4303	21.4303	21.4303	20.6959	20.3505	26.9	27.1313	22.1933	23.4542	0.965732	0.949615	1.25523	1.26602	1.0356	1.09444
397110	Brk1	4	+	146766043	146766058	15	146766050	3	mPAS	protein_coding		6342	2.56841e-05	4.16298e-05	2.28729e-05	0.000130926	3.43436e-05	3.43436e-05	0.00668566	0.0112995	0.00626184	0.0248972	0.00940214	0.00940214	12	6.2909	4.18836	6.25059	6.01131	5.13355	5.57494	1231.71	1231.71	1231.71	1231.71	1231.71	297.786	550.212	307.801	363.992	517.488	407.456	0.241766	0.446705	0.249897	0.295517	0.420137	0.330804
263271	-	2	-	8505997	8506003	6	8506000				-	424	2.08033e-05	1.20298e-05	6.79145e-05	1.63589e-05	0.00013895	2.08033e-05	0.00574479	0.0053633	0.0131982	0.00662669	0.02303	0.00662669	12	10.869	11.4008	10.9776	11.8835	11.3532	11.2968	79.1874	79.1874	79.1874	79.1874	79.1874	84.3344	81.9152	84.4765	74.2555	82.7288	81.5421	1.065	1.03445	1.06679	0.937719	1.04472	1.02974
433652	LOC100911847	5	+	138350708	138350755	47	138350750	1	mPAS	protein_coding	XM_003750030.5	13975	1.05534e-05	0.000118779	6.60234e-05	1.07862e-05	6.04769e-05	6.04769e-05	0.0039898	0.0214321	0.013023	0.00507181	0.0133069	0.013023	12	2.99334	2.76243	2.75859	3.60256	3.11471	3.04633	2664.99	2664.99	2664.99	2664.99	2664.99	1065.63	989.729	1050.78	1100.25	1087.87	1058.85	0.399861	0.371382	0.394291	0.412852	0.408207	0.397319
375742	Lhfpl4	4	-	146313534	146313544	10	146313541	3	mPAS	protein_coding	XM_039108778.1	4813	1.64694e-05	2.71075e-05	7.4353e-06	0.000211075	7.20382e-06	1.64694e-05	0.00517839	0.00883887	0.00319085	0.0338541	0.00357456	0.00517839	12	6.43734	6.47307	5.11381	4.91142	4.75476	5.53808	891.796	891.796	891.796	891.796	891.796	205.002	201.692	268.549	267.514	265.374	241.626	0.229875	0.226164	0.301132	0.299972	0.297573	0.270943
300679	Pmvk	2	+	174886357	174886367	10	174886360	1	mPAS	protein_coding		2033	1.42682e-05	3.9437e-05	6.84108e-05	6.6487e-05	8.95112e-05	6.6487e-05	0.00482037	0.0111494	0.0131982	0.0161178	0.0171241	0.0131982	12	5.99434	6.22628	6.24695	4.10763	6.19425	5.75389	369.425	369.425	369.425	369.425	369.425	156.366	133.153	130.187	236.092	136.124	158.384	0.423268	0.360432	0.352404	0.639079	0.368474	0.428731
164102	Helq	14	+	8821510	8821520	10	8821512	1		protein_coding		211	5.21364e-05	2.7159e-05	2.81271e-05	0.000116374	5.5403e-05	5.21364e-05	0.0102886	0.00883887	0.00732157	0.023098	0.0128629	0.0102886	12	3.53217	2.9301	2.90818	3.35415	3.5551	3.25594	37.0304	37.0304	37.0304	37.0304	37.0304	33.3198	30.8144	31.6898	32.0657	33.7455	32.3271	0.899797	0.832139	0.855779	0.865929	0.911293	0.872988
197906	Sh3rf1	16	-	28735522	28735533	11	28735522	2	mPAS	protein_coding		587	4.40474e-05	0.000124457	5.43148e-05	2.51027e-05	6.65637e-05	5.43148e-05	0.00926366	0.0220803	0.0115166	0.00857532	0.0141519	0.0115166	12	0.471696	0.421908	10.9553	11.032	0.0717419	4.59052	108.459	108.459	108.459	108.459	108.459	43.8568	44.7483	62.0244	59.5703	51.62	52.364	0.404362	0.412581	0.571868	0.549241	0.475939	0.482798
82055	Mpv17l	10	+	2003368	2003371	3	2003371	2		protein_coding	XR_005490607.1	128	2.35587e-05	0.000205006	1.7474e-05	2.04429e-05	4.942e-05	2.35587e-05	0.00623462	0.0307093	0.0052351	0.00759863	0.0119804	0.00759863	12	6.66941	6.50705	6.47067	4.79498	6.64205	6.21683	26.0258	26.0258	26.0258	26.0258	26.0258	19.211	20.5023	20.4769	21.7623	19.2508	20.2407	0.738154	0.787769	0.786792	0.836184	0.73968	0.777716
183715	Fgf14	15	-	101278671	101278672	1	101278671	6		protein_coding		90	2.71748e-05	4.13232e-05	6.35444e-05	0.00011423	7.44952e-05	6.35444e-05	0.00683518	0.0112995	0.0127545	0.0228396	0.0150684	0.0127545	12	5.16477	5.12456	5.56525	4.38906	5.99257	5.24724	16.6501	16.6501	16.6501	16.6501	16.6501	17.9277	17.913	16.8564	17.3056	14.8549	16.9715	1.07673	1.07585	1.01239	1.03937	0.892178	1.0193
40470	LOC100362069	1	+	83056721	83056734	13	83056730	2		protein_coding	XM_039100847.1	178	2.05191e-05	6.59308e-05	3.24106e-05	0.00016261	4.15159e-05	4.15159e-05	0.00571601	0.0148494	0.00810443	0.0286889	0.0106324	0.0106324	12	6.7661	6.51383	6.2709	8.23307	6.62926	6.88263	34.3344	34.3344	34.3344	34.3344	34.3344	33.4528	33.7832	33.4794	19.9277	33.3559	30.7998	0.974322	0.983945	0.975097	0.5804	0.9715	0.897053
361130	Ube3c	4	-	5648911	5648939	28	5648936	2	mPAS	protein_coding	XM_039108544.1	1191	9.3976e-06	5.56492e-05	1.59608e-05	8.6403e-05	0.000166142	5.56492e-05	0.00386427	0.0136996	0.0050134	0.0190549	0.0261196	0.0136996	12	6.67911	6.55526	6.651	5.5761	5.8108	6.25446	224.415	224.415	224.415	224.415	224.415	46.7892	49.1241	46.9112	61.073	59.7854	52.7366	0.208494	0.218898	0.209037	0.272143	0.266405	0.234995
149747	Cd48	13	+	84194402	84194404	2	84194404	2		protein_coding		112	9.58639e-05	0.000108113	0.000107522	5.25635e-06	2.48882e-05	9.58639e-05	0.0168196	0.0210315	0.0180665	0.00340687	0.00759974	0.0168196	12	8.96134	9.66221	9.77218	10.0631	9.41326	9.57441	19.7885	19.7885	19.7885	19.7885	19.7885	15.8469	14.6195	14.4881	13.3083	15.6042	14.7734	0.800812	0.738788	0.732148	0.672528	0.788551	0.746565
357751	Nnat	3	+	146228786	146228825	39	146228798	3	mPAS	protein_coding		817	1.73939e-05	4.82253e-05	7.99929e-05	0.000141351	7.21424e-05	7.21424e-05	0.00523265	0.0123507	0.0147694	0.0264052	0.0147808	0.0147694	12	6.15785	4.05025	4.29497	6.16384	5.72899	5.27918	145.398	145.398	145.398	145.398	145.398	50.0716	86.5574	88.8718	50.0988	65.1405	68.148	0.344376	0.595312	0.61123	0.344562	0.448014	0.468699
369633	LOC100910678	4	-	78330526	78330546	20	78330529	2		protein_coding	XM_039108671.1	1085	1.59937e-05	1.62961e-05	3.1409e-05	0.000237749	6.07585e-05	3.1409e-05	0.00507912	0.00601764	0.00791631	0.0362991	0.0133069	0.00791631	12	6.24504	6.14073	5.68669	5.67341	4.64523	5.67822	215.881	215.881	215.881	215.881	215.881	81.149	85.6256	101.648	101.36	119.008	97.7583	0.375896	0.396632	0.470852	0.469519	0.551266	0.452833
497502	Aco2	7	+	113428756	113428787	31	113428779	5	mPAS	protein_coding		459	3.02868e-05	5.99434e-05	5.50085e-06	5.90953e-05	0.000214121	5.90953e-05	0.0072865	0.0142061	0.00256177	0.0152489	0.0313357	0.0142061	12	5.35383	4.26248	5.98964	6.22352	6.28636	5.62317	91.0811	91.0811	91.0811	91.0811	91.0811	49.6482	54.8912	37.8082	32.6716	30.7321	41.1503	0.545099	0.602663	0.415105	0.358708	0.337414	0.451798
135069	Atp2b4	13	-	45156453	45156476	23	45156457	5		protein_coding		931	5.82788e-06	9.63752e-05	2.32442e-05	0.000185432	5.85819e-05	5.85819e-05	0.00293056	0.0193708	0.00627505	0.0314908	0.0131794	0.0131794	12	0.0677475	0.191833	0.0756199	11.0245	10.9673	4.4654	150.081	150.081	150.081	150.081	150.081	80.5877	71.4335	79.9762	141.815	141.832	103.129	0.53696	0.475966	0.532886	0.944919	0.945033	0.687153
45633	Agbl1	1	+	130539735	130539736	1	130539735	2		protein_coding		844	4.46122e-05	4.60722e-05	3.97471e-05	0.000161914	8.15487e-05	4.60722e-05	0.00932072	0.012189	0.00914673	0.0286889	0.0159861	0.012189	12	5.21181	6.16063	4.43485	6.20233	4.60696	5.32331	170.502	170.502	170.502	170.502	170.502	68.4901	42.8165	76.5512	41.4969	78.0865	61.4882	0.401696	0.25112	0.448975	0.243381	0.45798	0.36063
287428	Mrps27	2	+	30808574	30808583	9	30808576	1	mPAS	protein_coding	XM_039102540.1	791	2.38053e-05	3.02604e-05	1.64472e-05	0.000259383	4.70219e-05	3.02604e-05	0.00624781	0.00951465	0.005071	0.0376065	0.0114867	0.00951465	12	5.66094	4.0096	4.74963	4.85843	4.8898	4.83368	132.697	132.697	132.697	132.697	132.697	73.1314	103.817	99.8359	98.4277	95.9821	94.2389	0.551115	0.782364	0.752358	0.741746	0.723317	0.71018
456937	-	6	+	47472577	47472579	2	47472578				-	334	3.2732e-05	0.0002119	9.35029e-05	2.19928e-05	3.82138e-05	3.82138e-05	0.00769864	0.031593	0.0160507	0.00802786	0.0101979	0.0101979	12	10.6605	9.0255	11.0056	9.87768	9.28556	9.97096	62.1549	62.1549	62.1549	62.1549	62.1549	49.6633	45.905	46.7649	51.7227	50.882	48.9876	0.799024	0.738557	0.752393	0.832158	0.818631	0.788153
366765	Grm8	4	-	55997782	55997783	1	55997782	7		protein_coding		85	5.34446e-05	0.000111461	5.11269e-05	3.63803e-05	0.000152082	5.34446e-05	0.0104125	0.0210694	0.0111208	0.0112168	0.0246251	0.0112168	12	6.86686	6.74459	6.23278	4.99545	6.07039	6.18201	16.917	16.917	16.917	16.917	16.917	18.0048	18.3413	19.9748	17.671	20.2638	18.8511	1.0643	1.08419	1.18076	1.04457	1.19784	1.11433
369578	-	4	-	77745594	77745598	4	77745596				-	304	0.00011346	5.87882e-05	0.000124999	1.8769e-05	0.000146471	0.00011346	0.0189293	0.0141289	0.0204618	0.00735862	0.0239767	0.0189293	12	10.5723	0.0581419	9.78134	11.9136	10.1393	8.49295	54.2195	54.2195	54.2195	54.2195	54.2195	40.0196	16.6466	44.9801	19.6265	44.3419	33.1229	0.738104	0.307023	0.829592	0.361982	0.817822	0.610904
467800	Klc1	6	+	130866721	130866736	15	130866730	3	mPAS	protein_coding	XM_006240621.4	3763	1.2135e-05	1.75386e-05	7.27598e-05	0.000298367	7.16565e-05	7.16565e-05	0.00425882	0.00632924	0.0138361	0.0415495	0.0147766	0.0138361	12	4.12401	6.237	6.14903	5.78967	6.10136	5.68022	692.042	692.042	692.042	692.042	692.042	177.276	88.2487	95.5518	122.779	99.3716	116.645	0.256164	0.127519	0.138072	0.177416	0.143592	0.168553
394339	Copg1	4	+	120392480	120392508	28	120392492	4	mPAS	protein_coding	XM_008763066.3	1855	2.73347e-05	0.000108611	6.0304e-05	0.000146418	0.000134653	0.000108611	0.00683518	0.0210315	0.0123553	0.0270336	0.0227455	0.0210315	12	4.48159	6.14003	6.42562	5.91297	6.4273	5.8775	367.963	367.963	367.963	367.963	367.963	139.607	113.879	98.7515	123.007	98.7266	114.794	0.379407	0.309485	0.268374	0.334291	0.268306	0.311972
223495	Dbn1	17	+	9164597	9164722	125	9164623	2		protein_coding		3329	2.90896e-05	0.000223427	6.4508e-05	0.000130705	4.22537e-05	6.4508e-05	0.00716122	0.0325475	0.0128036	0.0248972	0.0107348	0.0128036	12	10.9113	0.267524	10.6589	10.8739	10.7208	8.6865	624.753	624.753	624.753	624.753	624.753	188.79	117.055	195.701	189.366	192.289	176.64	0.302184	0.187362	0.313245	0.303106	0.307784	0.282736
29999	Kcnip2	1	-	244641140	244641166	26	244641147	1	mPAS	protein_coding	NM_020094.2	9090	1.8009e-05	0.000121145	6.34151e-05	0.00011874	0.000183627	0.00011874	0.00523265	0.0217356	0.0127545	0.023134	0.028308	0.0217356	12	4.89628	5.15667	6.00019	4.41811	5.28301	5.15085	1717.62	1717.62	1717.62	1717.62	1717.62	416.472	411.635	348.93	401.108	412.205	398.07	0.242471	0.239655	0.203148	0.233526	0.239987	0.231757
307883	Zranb2	2	+	246580360	246580403	43	246580400	6		protein_coding	XM_017591059.2	266	2.25461e-05	0.000140141	3.43425e-05	0.000222755	9.24545e-05	9.24545e-05	0.00611964	0.0239272	0.00835568	0.0348475	0.0175813	0.0175813	12	6.22742	6.90851	8.14734	7.6484	7.3681	7.25995	48.3295	48.3295	48.3295	48.3295	48.3295	30.3959	30.0222	20.7892	25.0545	27.4008	26.7325	0.628931	0.621199	0.430155	0.518411	0.566958	0.553131
496624	Polr2f	7	+	110722091	110722122	31	110722102	3		protein_coding		3610	1.70735e-05	1.83079e-05	4.51247e-05	0.000404904	3.05816e-05	3.05816e-05	0.00523265	0.00646006	0.0101633	0.0504256	0.00882891	0.00882891	12	5.55486	6.32023	6.21429	4.8358	6.20069	5.82517	664.181	664.181	664.181	664.181	664.181	345.677	230.718	248.486	403.004	251.242	295.825	0.520456	0.347372	0.374124	0.606768	0.378274	0.445399
326788	Scn2a	3	-	50307820	50307826	6	50307821	12		protein_coding	XM_039104284.1	3304	0.000158945	0.000116944	0.00022189	5.47682e-06	1.71772e-05	0.000116944	0.0234405	0.0214321	0.0288793	0.00340687	0.00562366	0.0214321	12	10.2811	10.5233	10.6615	9.53778	9.33595	10.0679	627.512	627.512	627.512	627.512	627.512	293.872	271.955	265.028	318.173	307.652	291.336	0.468313	0.433386	0.422347	0.507039	0.490272	0.464271
387610	Ttc26	4	+	67146642	67146642	0	67146642	1		protein_coding	NM_001025045.1	30	2.96718e-05	0.000216723	3.77386e-05	0.000152672	9.81911e-05	9.81911e-05	0.00724836	0.0320115	0.0089446	0.0274564	0.0182718	0.0182718	12	11.0545	1.36236	1.59679	1.13803	11.9977	5.42988	5.45124	5.45124	5.45124	5.45124	5.45124	0.120331	10.1932	10.9663	9.90433	5.43953	7.32474	0.0220741	1.86989	2.01171	1.81689	0.997853	1.34368
223617	Sncb	17	+	9855002	9855054	52	9855013	2	mPAS	protein_coding		52727	4.31344e-05	7.34101e-05	9.19609e-05	0.000164732	0.000165187	9.19609e-05	0.00921791	0.0161895	0.0160462	0.0287439	0.0261196	0.0161895	12	4.05802	6.18795	5.13952	4.03707	6.20388	5.12529	9803.45	9803.45	9803.45	9803.45	9803.45	2643.54	1225.58	2299.87	2754.04	1203.52	2025.31	0.269654	0.125015	0.234598	0.280925	0.122765	0.206592
287192	Gcnt4	2	+	28283056	28283081	25	28283080	1		protein_coding		451	0.000137025	2.97291e-05	4.48385e-05	0.000236392	0.000101371	0.000101371	0.0215421	0.00944106	0.0101633	0.0362661	0.0186083	0.0186083	12	5.04226	6.04228	5.33424	6.13022	5.84202	5.6782	84.2433	84.2433	84.2433	84.2433	84.2433	46.7583	41.0313	46.2188	39.8583	43.1732	43.408	0.555039	0.487057	0.548635	0.473133	0.512482	0.515269
415263	Kpna6	5	-	141987784	141987790	6	141987788	3		protein_coding		95	6.23696e-05	0.000156224	0.00014391	0.000118546	6.8951e-05	0.000118546	0.0118396	0.0261117	0.0224026	0.023134	0.0145012	0.0224026	12	11.398	0.633073	11.078	0.573924	11.3103	6.99864	17.6895	17.6895	17.6895	17.6895	17.6895	14.662	12.7262	14.3475	12.8762	14.7045	13.8633	0.828854	0.719421	0.811075	0.727904	0.831259	0.783703
126765	Lamtor4	12	+	17262462	17262491	29	17262467	1	mPAS	protein_coding		3104	2.6962e-05	0.000248595	0.000159933	4.08008e-05	8.60545e-05	8.60545e-05	0.00683518	0.0341926	0.024071	0.0121094	0.0165626	0.0165626	12	3.9441	4.22387	2.27653	2.50021	2.24081	3.0371	581.451	581.451	581.451	581.451	581.451	102.399	81.361	143.619	139.992	141.115	121.697	0.17611	0.139927	0.247001	0.240762	0.242694	0.209299
254659	Aprt	19	-	50626195	50626219	24	50626202	1		protein_coding		7054	0.000158842	0.000269904	8.73225e-05	9.59132e-06	4.1081e-05	8.73225e-05	0.0234405	0.0364738	0.0153976	0.00475925	0.0106066	0.0153976	12	3.47801	2.94818	3.91704	2.91727	3.64481	3.38106	1317.48	1317.48	1317.48	1317.48	1317.48	347.931	314.576	342.9	330.69	353.667	337.953	0.264088	0.23877	0.260269	0.251002	0.268442	0.256514
3661	Rmnd1	1	-	40859823	40859850	27	40859828	1	mPAS	protein_coding	XM_039103392.1	1026	0.000148059	0.00018229	2.92116e-05	0.000135712	7.14894e-05	0.000135712	0.0228223	0.0285171	0.00748123	0.0255018	0.0147766	0.0228223	12	6.40919	5.6544	4.36861	4.44025	6.33139	5.44077	191.894	191.894	191.894	191.894	191.894	56.7668	78.8713	87.553	87.1773	59.7773	74.0292	0.295824	0.411015	0.456257	0.454299	0.311512	0.385781
293569	-	2	+	104318767	104318776	9	104318768				-	282	0.000112331	0.000172207	0.00013106	4.19469e-05	0.000109351	0.000112331	0.0188747	0.0277603	0.0210861	0.0123343	0.0192925	0.0192925	12	0.0527254	8.98873	11.5586	8.96503	9.41329	7.79568	48.617	48.617	48.617	48.617	48.617	19.0219	40.1309	28.4104	38.1521	44.086	33.9602	0.39126	0.825449	0.584372	0.784748	0.906801	0.698526
336423	Necab3	3	-	143049474	143049483	9	143049477	2	mPAS	protein_coding	XM_039105073.1	2394	0.000102652	0.000123092	0.000260888	1.20302e-05	7.65407e-05	0.000102652	0.0176211	0.0219609	0.0323634	0.00523347	0.0152672	0.0176211	12	3.29447	6.05425	5.89533	4.23373	3.99959	4.69547	448.163	448.163	448.163	448.163	448.163	85.3515	33.7294	40.5194	88.3039	91.3658	67.854	0.190447	0.0752614	0.0904121	0.197035	0.203867	0.151405
382394	-	4	+	22283106	22283106	0	22283106				-	191	1.85066e-05	0.000508499	4.56857e-05	1.11516e-05	9.70688e-06	1.85066e-05	0.00529473	0.0576213	0.0102172	0.00507181	0.00395097	0.00529473	12	9.2186	9.69257	9.12359	10.1773	10.5317	9.74876	34.4309	34.4309	34.4309	34.4309	34.4309	21.4997	19.469	22.0571	18.0469	16.0998	19.4345	0.62443	0.565451	0.640618	0.524147	0.467599	0.564449
454671	Dtnb	6	+	26763442	26763475	33	26763467	2	mPAS	protein_coding		1078	0.000191301	7.84606e-05	0.000113486	0.000161408	5.89312e-05	0.000113486	0.0270968	0.0166111	0.0187708	0.0286889	0.0131794	0.0187708	12	5.81829	5.87502	5.24891	4.26927	5.95829	5.43396	192.595	192.595	192.595	192.595	192.595	110.985	107.907	139.16	153.302	103.1	122.891	0.576261	0.560281	0.72255	0.795979	0.535321	0.638078
253476	Ist1	19	-	37648825	37648851	26	37648847	2	mPAS	protein_coding		3692	3.07104e-05	0.000229514	0.000146527	0.000148667	8.36697e-05	0.000146527	0.00733286	0.0326847	0.0224795	0.0271334	0.0162018	0.0224795	12	3.74881	3.16888	5.78744	3.25993	2.99703	3.79242	690.137	690.137	690.137	690.137	690.137	284.926	268.583	151.006	273.2	270.372	249.617	0.412854	0.389174	0.218806	0.395863	0.391765	0.361693
487744	Ckap4	7	+	19238779	19238811	32	19238785	2		protein_coding		1364	0.000240429	0.000273183	5.41598e-05	9.78168e-05	1.11724e-05	9.78168e-05	0.0313261	0.0366053	0.0115166	0.0207691	0.00438028	0.0207691	12	2.30486	4.1936	2.48106	3.00699	4.07548	3.2124	261.935	261.935	261.935	261.935	261.935	68.72	44.9252	68.2718	69.4276	48.4356	59.956	0.262355	0.171513	0.260644	0.265056	0.184914	0.228896
525691	Nedd4	8	+	73468135	73468183	48	73468138	4		protein_coding		151	0.000159434	0.000176127	1.67681e-05	0.000253397	7.37164e-05	0.000159434	0.0234405	0.0281068	0.00511174	0.0372552	0.0150065	0.0234405	12	6.27695	4.75582	6.04313	4.69747	4.97601	5.34988	26.5737	26.5737	26.5737	26.5737	26.5737	23.0244	24.7695	24.4672	24.833	25.9784	24.6145	0.866436	0.932106	0.920729	0.934495	0.977597	0.926272
427074	-	5	+	78441624	78441624	0	78441624				-	21	9.27601e-05	0.000224905	8.18908e-05	0.000209039	7.57289e-05	9.27601e-05	0.0163655	0.0325566	0.0150324	0.0338541	0.015221	0.0163655	12	2.94434	11.1191	1.97843	3.32994	1.97869	4.2701	4.81519	4.81519	4.81519	4.81519	4.81519	8.18	0.65829	9.33043	7.28463	9.33468	6.95761	1.69879	0.136711	1.93771	1.51284	1.93859	1.44493
263615	-	2	-	14920522	14920525	3	14920525				-	532	0.000144129	1.03117e-05	0.000194008	0.000300511	5.03376e-05	0.000144129	0.0224368	0.00511181	0.0268393	0.0415495	0.0121104	0.0224368	12	10.6615	10.5627	9.81876	11.9319	10.8745	10.7699	91.2834	91.2834	91.2834	91.2834	91.2834	58.6425	59.1999	65.6033	27.8688	56.285	53.5199	0.642422	0.648529	0.718678	0.3053	0.616596	0.586305
65070	Cluap1	10	-	11588010	11588022	12	11588013	2	mPAS	protein_coding		3401	5.21606e-05	0.000116285	0.000167599	0.000220315	0.000151915	0.000151915	0.0102886	0.0214321	0.0244883	0.0346364	0.0246251	0.0244883	12	3.01092	4.48389	3.94904	2.97985	3.6521	3.61516	615.741	615.741	615.741	615.741	615.741	267.736	282.592	307.604	268	306.976	286.582	0.43482	0.458947	0.499567	0.435249	0.498547	0.465426
80589	Cygb	10	-	101877669	101877680	11	101877675	2	mPAS	protein_coding	NM_130744.2	5155	8.48653e-05	0.000200304	2.19665e-05	0.000300922	0.00010025	0.00010025	0.0150562	0.0302908	0.00622848	0.0415495	0.0185094	0.0185094	12	6.05178	4.77357	4.91354	3.39607	3.17401	4.46179	992.342	992.342	992.342	992.342	992.342	101.758	215.245	203.738	235.557	221.745	195.608	0.102543	0.216906	0.20531	0.237375	0.223456	0.197118
309684	LOC288777	20	-	7889517	7889532	15	7889522	1	mPAS	pseudogene		35430	0.000219781	0.000173357	3.77421e-05	0.000164551	0.000128091	0.000164551	0.0296323	0.0278045	0.0089446	0.0287439	0.0218698	0.0278045	12	5.3	6.16754	5.90829	5.10669	6.14487	5.72548	6566.35	6566.35	6566.35	6566.35	6566.35	1170.66	736.461	883.37	1244.67	744.827	955.996	0.178281	0.112157	0.13453	0.189552	0.113431	0.14559
276978	Dap3	2	-	174319496	174319508	12	174319505	2		protein_coding		1790	6.26336e-05	0.00010134	8.77591e-05	0.000351709	0.000123294	0.00010134	0.0118396	0.0201141	0.0153976	0.0469277	0.0211646	0.0201141	12	2.10819	3.03306	1.97048	1.6913	4.23804	2.60822	338.691	338.691	338.691	338.691	338.691	107.794	97.2804	107.419	107.156	53.6959	94.6689	0.318265	0.287225	0.31716	0.316381	0.158539	0.279514
538044	Hecw2	9	-	55363714	55363751	37	55363747	6		protein_coding	XM_039083598.1	685	4.64259e-05	0.000128886	8.31633e-06	0.000434168	0.000112926	0.000112926	0.00951192	0.022739	0.00338592	0.0528271	0.0197043	0.0197043	12	8.10988	6.79083	6.6161	5.82288	6.94094	6.85613	129.59	129.59	129.59	129.59	129.59	19.8229	45.069	47.1869	49.8779	42.6468	40.9207	0.152967	0.347781	0.364125	0.38489	0.32909	0.315771
564858	Upf3b	X	-	116335307	116335324	17	116335316	4	mPAS	protein_coding		328	2.61627e-05	8.30717e-05	0.000198261	4.86937e-05	0.000393194	8.30717e-05	0.00670038	0.0173475	0.0270223	0.0135646	0.0445952	0.0173475	12	6.37043	6.34704	6.23848	5.01681	5.80494	5.95554	58.9008	58.9008	58.9008	58.9008	58.9008	18.1869	18.3717	19.5487	30.0126	24.6333	22.1506	0.308771	0.31191	0.331892	0.509545	0.418217	0.376067
360528	Ppdpf	3	+	168301007	168301060	53	168301040	1	mPAS	protein_coding		5535	0.000113849	0.000142029	0.000146189	0.000118229	0.000232712	0.000142029	0.0189293	0.0241199	0.0224795	0.023134	0.03314	0.023134	12	4.22789	3.02899	4.02803	3.41629	3.0125	3.54274	1045.82	1045.82	1045.82	1045.82	1045.82	440.975	394.832	457.777	419.011	396.082	421.736	0.421653	0.377532	0.43772	0.400652	0.378727	0.403257
29286	-	1	-	239411352	239411363	11	239411359				-	741	3.59192e-05	1.04628e-05	4.73369e-05	0.000607489	5.22787e-05	4.73369e-05	0.00823591	0.00511181	0.0103674	0.0638809	0.0124828	0.0103674	12	6.22916	4.22686	6.1528	5.77989	4.23257	5.32426	141.701	141.701	141.701	141.701	141.701	54.2112	81.1813	56.4508	67.0254	81.1814	68.01	0.382574	0.572904	0.398379	0.473004	0.572905	0.479953
312807	Hk1	20	-	30230482	30230495	13	30230489	2	mPAS	protein_coding	XM_039098432.1	9111	0.000132147	0.00010329	8.52735e-05	1.34924e-05	0.000420432	0.00010329	0.0211949	0.0203738	0.0153976	0.00579025	0.046848	0.0203738	12	3.56675	4.46918	4.39828	3.27135	3.04028	3.74917	1688.61	1688.61	1688.61	1688.61	1688.61	642.261	535.722	567.668	662.015	641.005	609.734	0.380349	0.317256	0.336174	0.392047	0.379605	0.361086
109157	-	11	+	4341669	4341670	1	4341670				-	1869	6.07075e-05	0.000227063	0.000130502	2.46709e-05	0.000311889	0.000130502	0.0117554	0.0326283	0.0210861	0.00857532	0.0399239	0.0210861	12	10.5662	11.5133	10.6655	10.632	10.7584	10.8271	333.887	333.887	333.887	333.887	333.887	171.502	124.687	170.748	167.32	170.788	161.009	0.513652	0.37344	0.511395	0.501126	0.511513	0.482225
468999	Rps15-ps2	7	-	966390	966404	14	966398	1	mPAS			3767	5.25238e-05	0.000134545	2.16824e-05	0.00019465	0.000356037	0.000134545	0.0102963	0.0232214	0.00622848	0.0320285	0.0418765	0.0232214	12	4.83087	6.00105	4.28179	6.07009	6.11621	5.46	745.615	745.615	745.615	745.615	745.615	323.729	219.722	336.073	211.151	203.935	258.922	0.434177	0.294686	0.450733	0.28319	0.273513	0.34726
92652	Septin4	10	+	72390762	72390771	9	72390763	3	mPAS	protein_coding	XM_039085563.1	13332	6.1109e-05	5.33055e-05	0.000195229	0.000218596	0.000244757	0.000195229	0.0117614	0.0133293	0.0268393	0.0345371	0.0337366	0.0268393	12	6.42069	6.39952	5.75357	4.3589	5.35973	5.65848	2371.92	2371.92	2371.92	2371.92	2371.92	1096.91	1106.48	1506.63	1771.57	1667.76	1429.87	0.462458	0.466492	0.635196	0.746896	0.703127	0.602834
269358	Marchf6	2	-	82455676	82455714	38	82455686	3	mPAS	protein_coding		11598	0.00022021	0.000110662	4.64951e-05	0.000370895	5.8756e-05	0.000110662	0.0296323	0.0210694	0.0102538	0.0474889	0.0131794	0.0210694	12	0.282668	10.7658	0.368632	11.0821	0.346847	4.5692	2162.82	2162.82	2162.82	2162.82	2162.82	303.215	341.621	295.773	356.716	297.172	318.899	0.140194	0.157952	0.136754	0.164931	0.1374	0.147446
211256	Smim19	16	+	69564320	69564326	6	69564323	5		protein_coding		602	4.35396e-05	5.73179e-05	6.8574e-05	0.000532573	0.000130719	6.8574e-05	0.00921791	0.0140019	0.0131982	0.059763	0.0221992	0.0140019	12	4.73889	5.94193	4.82374	6.68418	4.92689	5.42313	107.159	107.159	107.159	107.159	107.159	55.8797	58.5338	57.7909	47.7956	58.5052	55.7011	0.521465	0.546232	0.5393	0.446024	0.545965	0.519797
439840	-	6	-	18625003	18625005	2	18625003				-	331	0.000195902	6.29565e-05	0.000169558	4.02123e-05	0.000367593	0.000169558	0.0274064	0.0144877	0.0245875	0.0120474	0.0426046	0.0245875	12	11.6787	10.918	11.2549	11.8343	0.147735	9.16673	61.5482	61.5482	61.5482	61.5482	61.5482	21.381	24.2843	23.4563	20.3165	18.0022	21.4881	0.347386	0.394557	0.381105	0.330091	0.29249	0.349126
24983	Cnih2	1	-	202399403	202399425	22	202399423	1	mPAS	protein_coding		35329	0.000543879	2.50826e-05	0.000104831	0.000150091	3.67947e-05	0.000104831	0.0514046	0.00838471	0.0177081	0.0272367	0.00998708	0.0177081	12	4.56432	2.92354	3.74564	3.51735	3.23169	3.59651	6591.19	6591.19	6591.19	6591.19	6591.19	1012.79	1102.99	1141.19	1146.82	1128.72	1106.5	0.153658	0.167343	0.173138	0.173992	0.171247	0.167876
257970	Ptger1	19	+	24473668	24473680	12	24473671	1		protein_coding		322	0.00011487	7.27283e-05	0.000345838	0.000114353	0.000222833	0.00011487	0.0189547	0.0161513	0.0390846	0.0228396	0.0321659	0.0228396	12	1.19723	1.88199	2.19887	2.78346	1.10423	1.83315	64.0003	64.0003	64.0003	64.0003	64.0003	26.757	26.6498	26.0192	22.9616	26.7266	25.8228	0.418075	0.416401	0.406548	0.358772	0.417601	0.40348
158119	-	14	-	61040990	61040991	1	61040990				-	294	0.000129119	0.000236532	0.000131468	0.000359275	2.55569e-05	0.000131468	0.0208144	0.0332369	0.0210861	0.0469277	0.00772964	0.0210861	12	11.6009	11.7994	0.107017	10.7004	9.97263	8.83607	53.8094	53.8094	53.8094	53.8094	53.8094	21.4997	19.2276	15.4001	28.0635	30.1076	22.8597	0.399553	0.357328	0.286197	0.521535	0.559524	0.424828
57375	Osbp	1	+	208918497	208918514	17	208918511	3	mPAS	protein_coding		2406	1.99907e-05	0.000229497	8.41422e-05	0.000354875	0.000199163	0.000199163	0.00561809	0.0326847	0.0153569	0.0469277	0.029694	0.029694	12	10.9206	9.08807	9.15336	9.80832	10.8186	9.95779	441.814	441.814	441.814	441.814	441.814	100.151	107.598	110.91	114.055	100.637	106.67	0.226681	0.243537	0.251034	0.258152	0.227781	0.241437
443906	-	6	-	64611309	64611310	1	64611310				-	37	0.000277178	0.000328439	0.00018668	8.54998e-05	2.36774e-05	0.00018668	0.0337255	0.0425724	0.0265847	0.0190549	0.00744479	0.0265847	12	9.72506	10.8471	9.31188	9.95564	9.33936	9.83581	6.56387	6.56387	6.56387	6.56387	6.56387	10.4785	8.6643	10.2916	10.6487	10.7815	10.1729	1.59639	1.32	1.56791	1.62233	1.64255	1.54984
435535	Id3	5	+	148374333	148374359	26	148374353	1	mPAS	protein_coding	NM_013058.2	8087	3.29696e-05	4.31859e-06	9.22546e-06	0.000826697	8.11004e-05	3.29696e-05	0.00769864	0.00268913	0.00361695	0.0763568	0.0159861	0.00769864	12	4.7116	5.37925	6.15875	5.24389	6.16377	5.53145	1515.91	1515.91	1515.91	1515.91	1515.91	420.546	337.23	194.023	359.942	192.175	300.783	0.277423	0.222461	0.127992	0.237444	0.126773	0.198418
162929	Asb3	14	-	104764942	104764945	3	104764945	4		protein_coding	XM_039092258.1	323	3.75351e-05	0.000725293	5.44733e-05	9.87043e-05	4.28668e-05	5.44733e-05	0.00849757	0.0717543	0.0115166	0.0207691	0.0108041	0.0115166	12	5.77149	5.28808	6.35405	4.70335	5.03555	5.4305	64.6336	64.6336	64.6336	64.6336	64.6336	27.6283	28.307	24.713	26.3271	27.628	26.9207	0.427461	0.437961	0.382356	0.407329	0.427457	0.416513
266849	-	2	-	43170758	43170767	9	43170760				-	3143	0.000246553	0.000264589	0.000231896	8.04112e-05	0.000138388	0.000231896	0.0319026	0.0359084	0.0296949	0.0181108	0.02303	0.0296949	12	10.3604	9.75404	9.30071	10.3857	8.6096	9.68208	553.678	553.678	553.678	553.678	553.678	224.328	260.659	269.157	225.62	260.941	248.141	0.40516	0.470778	0.486126	0.407493	0.471287	0.448169
4512	RGD1560015	1	-	47263641	47263655	14	47263646	1	mPAS	protein_coding	XM_574311.8	9810	1.47448e-05	4.6668e-05	2.56869e-05	0.000843948	4.09484e-05	4.09484e-05	0.00487761	0.012189	0.00674164	0.0765751	0.0106066	0.0106066	12	6.33867	5.86588	6.48517	5.1695	6.45152	6.06215	1811.69	1811.69	1811.69	1811.69	1811.69	732.921	869.953	676.713	975.679	685.465	788.146	0.404551	0.480189	0.373526	0.538546	0.378357	0.435034
25090	Sf3b2	1	-	202584263	202584282	19	202584274	3		protein_coding		159	0.000274579	9.45916e-05	0.000543472	6.05201e-06	6.68447e-05	9.45916e-05	0.0337255	0.0191334	0.050613	0.00346355	0.0141519	0.0191334	12	8.30103	8.09685	8.29237	7.06535	6.19316	7.58975	26.7023	26.7023	26.7023	26.7023	26.7023	13.9074	15.8259	14.0843	23.488	25.521	18.5653	0.520829	0.59268	0.527454	0.879624	0.955761	0.69527
420641	LOC102556004	5	+	9298234	9298245	11	9298238	3		lncRNA	XR_592380.3	1235	0.000370195	0.000399278	7.5353e-05	7.80297e-05	6.34906e-05	7.80297e-05	0.041689	0.0487687	0.0141372	0.0176999	0.0138101	0.0176999	12	6.08392	5.44792	3.98709	2.8637	2.98001	4.27253	239.781	239.781	239.781	239.781	239.781	37.6044	69.8489	112.436	101.964	103.629	85.0964	0.156828	0.291303	0.468909	0.425238	0.432184	0.354892
41839	Klk6	1	+	94286109	94286148	39	94286135	1	mPAS	protein_coding		8229	0.000105518	0.000131237	0.000324408	0.000172022	0.000263913	0.000172022	0.0180157	0.0230259	0.0375993	0.0295293	0.0358166	0.0295293	12	4.80221	5.98445	4.23571	6.39749	6.29791	5.54355	1538.06	1538.06	1538.06	1538.06	1538.06	306.551	236.616	308.848	189.249	199.967	248.246	0.19931	0.15384	0.200803	0.123044	0.130012	0.161402
71223	Aloxe3	10	-	53849529	53849533	4	53849533	2		protein_coding	XM_017597089.2	79	0.000148761	5.91728e-05	0.000242579	0.000265315	0.000282202	0.000242579	0.0228223	0.0141289	0.0306916	0.0379532	0.0374975	0.0306916	12	11.6404	10.104	10.5828	10.6366	10.798	10.7524	13.5094	13.5094	13.5094	13.5094	13.5094	11.0349	16.7641	16.2738	16.1201	15.9464	15.2279	0.816829	1.24091	1.20462	1.19325	1.18039	1.1272
57185	Cpsf7	1	+	207191931	207191945	14	207191938	4	mPAS	protein_coding		966	6.43953e-05	0.000132909	1.1635e-05	0.000761783	3.10532e-05	6.43953e-05	0.0121006	0.0230644	0.00439871	0.0738781	0.00888429	0.0121006	12	10.4139	10.8723	10.4195	10.9849	0.401096	8.61834	178.755	178.755	178.755	178.755	178.755	102.394	107.037	102.368	104.013	75.2452	98.2115	0.572819	0.598792	0.572673	0.581876	0.420941	0.54942
209842	-	16	+	59091442	59091443	1	59091443				-	392	0.000154749	0.000203384	5.47597e-05	0.000579707	1.58155e-05	0.000154749	0.0234017	0.0306107	0.0115166	0.0621951	0.00534312	0.0234017	12	9.64972	8.92484	8.4485	8.58086	9.07955	8.93669	68.0224	68.0224	68.0224	68.0224	68.0224	39.491	42.7264	41.3653	41.3007	43.4041	41.6575	0.580559	0.628123	0.608112	0.607163	0.638086	0.612408
28791	Fgfbp3	1	-	234644014	234644035	21	234644025	1	mPAS	protein_coding		596	4.56129e-05	7.64502e-05	3.84918e-05	0.000742801	0.000109238	7.64502e-05	0.00940603	0.0164206	0.00898811	0.072806	0.0192925	0.0164206	12	9.89362	9.70411	9.76138	10.2981	9.65025	9.86149	111.639	111.639	111.639	111.639	111.639	44.1305	44.8082	46.1612	39.64	44.8698	43.9219	0.395296	0.401366	0.413487	0.355073	0.401919	0.393428
509416	Rab11a	8	-	65223695	65223706	11	65223701	6	mPAS	protein_coding	NM_031152.3	1006	7.80842e-05	6.17363e-05	6.38589e-05	0.000504245	0.000307517	7.80842e-05	0.0142513	0.0143107	0.0127545	0.0582302	0.0395378	0.0143107	12	4.43986	4.43383	6.39734	4.40138	5.59326	5.05313	191.92	191.92	191.92	191.92	191.92	95.3714	93.6468	65.9845	94.7307	89.8829	87.9233	0.496934	0.487948	0.343813	0.493596	0.468336	0.458126
315606	RT1-A3	20	+	4851330	4851346	16	4851333	1		protein_coding		444	0.000135421	0.000705659	8.68209e-05	6.12946e-05	4.05754e-05	8.68209e-05	0.0215028	0.0706928	0.0153976	0.0154264	0.0106066	0.0154264	12	7.81804	5.51479	5.84416	6.80533	6.1404	6.42454	83.6121	83.6121	83.6121	83.6121	83.6121	28.9988	44.4839	46.498	44.2987	46.6805	42.192	0.346826	0.532027	0.556115	0.529812	0.558299	0.504616
94913	Vps25	10	+	86201594	86201610	16	86201603	1	mPAS	protein_coding	NM_001173451.1	5240	0.000110803	3.7222e-05	7.56784e-05	0.000556738	0.00026525	0.000110803	0.0187168	0.01091	0.0141372	0.06139	0.0358449	0.0187168	12	6.52825	6.08217	6.28817	6.12364	5.85463	6.17537	1001.27	1001.27	1001.27	1001.27	1001.27	175.559	210.816	195.977	208.495	224.749	203.119	0.175337	0.210549	0.195729	0.208231	0.224465	0.202862
484876	Faim2	7	-	130633347	130633429	82	130633387	5		protein_coding		2738	7.13552e-05	4.66663e-05	9.18173e-06	0.000827117	0.000107315	7.13552e-05	0.0132516	0.012189	0.00361695	0.0763568	0.0192543	0.0132516	12	4.29537	4.392	6.38009	4.32747	5.48827	4.97664	524.822	524.822	524.822	524.822	524.822	223.496	218.604	147.956	227.856	209.5	205.482	0.42585	0.416531	0.281917	0.434158	0.399183	0.391528
537213	Tgfbrap1	9	-	45351927	45351929	2	45351929	2		protein_coding		1351	0.000102217	0.000178309	0.000220045	0.000362039	0.000202263	0.000202263	0.0176211	0.0283128	0.0288793	0.0469277	0.0297373	0.0288793	12	9.33325	9.91052	9.11528	9.76139	8.90191	9.40447	236.326	236.326	236.326	236.326	236.326	129.341	133.42	124.841	131.579	121.527	128.142	0.547298	0.564561	0.52826	0.556768	0.514234	0.542224
398413	M6pr	4	+	155510194	155510227	33	155510212	1	mPAS	protein_coding		2582	3.5763e-05	0.000795269	3.44678e-05	0.000194577	1.17558e-05	3.5763e-05	0.00823591	0.07472	0.00835568	0.0320285	0.00449793	0.00835568	12	10.4638	10.2268	10.3064	10.9365	10.8851	10.5637	472.654	472.654	472.654	472.654	472.654	130.502	129.78	131.046	128.571	126.703	129.32	0.276104	0.274576	0.277256	0.272019	0.268068	0.273605
121306	Rimbp2	12	-	27805692	27805699	7	27805697	5		protein_coding	NM_001100488.2	370	8.33161e-05	8.74335e-05	1.1824e-05	0.000688399	0.000245399	8.74335e-05	0.0148644	0.0179137	0.00441758	0.0691819	0.0337366	0.0179137	12	6.6774	6.90178	6.77816	7.81885	4.89688	6.61461	66.1955	66.1955	66.1955	66.1955	66.1955	34.401	32.5039	33.4064	19.1739	34.8109	30.8592	0.519688	0.491028	0.504663	0.289656	0.52588	0.466183
77528	Coa3	10	-	86220185	86220226	41	86220191	2	mPAS	protein_coding		2855	4.31127e-05	0.000448599	1.69012e-05	0.000575503	3.93157e-05	4.31127e-05	0.00921791	0.0523756	0.00511174	0.0621951	0.0104046	0.0104046	12	4.34094	2.73027	3.36114	2.72338	4.45031	3.52121	537.239	537.239	537.239	537.239	537.239	151.244	163.617	180.914	156.162	147.491	159.886	0.281521	0.304552	0.336747	0.290674	0.274535	0.297606
383744	Col1a2	4	+	32598828	32598871	43	32598867	4	mPAS	protein_coding		1851	0.00040248	0.000118451	0.000227545	7.02336e-05	0.0003296	0.000227545	0.0438707	0.0214321	0.0294945	0.0164001	0.0409149	0.0294945	12	10.8548	9.10224	10.2063	10.86	10.1941	10.2435	333.24	333.24	333.24	333.24	333.24	72.8382	84.0356	81.1369	73.4789	82.3089	78.7597	0.218576	0.252177	0.243479	0.220498	0.246996	0.236345
89120	Dlg4	10	+	54767870	54767873	3	54767870	5		protein_coding		41	0.000203019	0.00018644	0.000367736	0.000148354	0.000258837	0.000203019	0.0281541	0.0290083	0.0404942	0.0271334	0.0352785	0.0290083	12	5.68647	6.73729	6.89968	6.32921	4.9647	6.12347	6.99563	6.99563	6.99563	6.99563	6.99563	10.5598	9.53067	9.11473	10.2376	9.46822	9.78219	1.50948	1.36237	1.30292	1.46342	1.35345	1.39833
264661	Nsa2	2	-	28443130	28443178	48	28443149	3	mPAS	protein_coding		1610	0.000108862	0.000234766	0.000200058	0.000168254	0.000496689	0.000200058	0.0184874	0.0331825	0.0271506	0.0290693	0.0519487	0.0290693	12	3.02325	4.88689	3.89136	4.86639	2.94164	3.92191	288.758	288.758	288.758	288.758	288.758	114.348	108.027	129.97	111.069	113.905	115.464	0.396	0.374108	0.450101	0.384645	0.394465	0.399864
262790	LOC108351591	2	-	86920	86922	2	86922	1		lncRNA		95	0.00039714	0.000161043	0.000164457	0.000192334	0.000315959	0.000192334	0.0436401	0.0265434	0.0243976	0.0320285	0.0401356	0.0320285	12	6.04992	6.83504	5.82764	5.37282	5.00326	5.81774	17.5532	17.5532	17.5532	17.5532	17.5532	17.6389	16.1821	17.5957	16.9158	15.3087	16.7282	1.00488	0.92189	1.00242	0.96369	0.872132	0.953003
343725	Prpf40a	3	+	37677710	37677712	2	37677710	7		protein_coding	XM_008761713.3	138	0.000412032	0.000375232	0.000143357	0.000225243	7.69199e-05	0.000225243	0.0443556	0.0470998	0.0224026	0.0350639	0.0152672	0.0350639	12	9.17038	9.48667	9.10879	9.74762	9.49254	9.4012	24.6617	24.6617	24.6617	24.6617	24.6617	21.7139	21.0672	21.203	21.6954	21.3996	21.4158	0.88047	0.854249	0.859755	0.879718	0.867727	0.868384
170075	Bloc1s4	14	+	74044011	74044031	20	74044028	2		protein_coding	NM_001100766.1	1179	0.000276128	0.000260232	0.000251237	0.000248362	0.000198222	0.000251237	0.0337255	0.0354686	0.0316608	0.0370293	0.029694	0.0337255	12	0.30269	11.9132	11.8642	11.581	0.911937	7.31459	221.596	221.596	221.596	221.596	221.596	56.3029	56.2771	56.046	53.9781	52.3037	54.9815	0.254079	0.253963	0.25292	0.243588	0.236032	0.248116
122816	Med13l	12	-	37808153	37808193	40	37808193	3		protein_coding		152	0.000422278	0.000109788	0.000159467	0.00035236	0.000194412	0.000194412	0.0445524	0.0210694	0.024071	0.0469277	0.0296824	0.0296824	12	11.0211	10.6775	11.4953	0.111239	0.206967	6.70243	26.7266	26.7266	26.7266	26.7266	26.7266	28.2712	30.8426	23.7691	16.1307	14.8134	22.7654	1.05779	1.154	0.889342	0.603543	0.554257	0.851788
294615	Mfn1	2	+	115342857	115342870	13	115342867	3		protein_coding		62	8.14556e-05	0.000385078	9.31476e-05	0.000527871	0.000171645	0.000171645	0.0146976	0.0477124	0.0160507	0.0596083	0.0265898	0.0265898	12	5.84591	5.24491	6.60039	4.83182	5.71585	5.64778	11.3738	11.3738	11.3738	11.3738	11.3738	13.8178	14.5487	11.0822	14.3404	14.1243	13.5827	1.21488	1.27914	0.974363	1.26082	1.24183	1.19421
170703	Ctbp1	14	+	77483145	77483177	32	77483171	3		protein_coding		123	3.60485e-05	0.000409118	0.000193693	7.02154e-05	0.000552146	0.000193693	0.00823591	0.0497791	0.0268393	0.0164001	0.0546246	0.0268393	12	8.32684	6.97837	6.81654	8.54064	6.63015	7.45851	21.4952	21.4952	21.4952	21.4952	21.4952	12.5851	15.6045	15.5648	10.8347	15.3548	13.9888	0.585483	0.725952	0.724104	0.50405	0.714337	0.650785
200781	Lsm1	16	-	66277349	66277369	20	66277366	1	mPAS	protein_coding		448	0.000136537	0.000846312	0.000100554	1.36953e-05	0.000165809	0.000136537	0.0215421	0.0776772	0.0170765	0.00579895	0.0261196	0.0215421	12	6.47861	6.5013	6.31422	4.76446	6.32976	6.07767	83.0085	83.0085	83.0085	83.0085	83.0085	21.5767	21.4041	23.4593	30.8962	23.2844	24.1241	0.259933	0.257854	0.282613	0.372205	0.280507	0.290622
447912	Npc2	6	-	104397221	104397240	19	104397233	2	mPAS	protein_coding		401	0.00024883	2.7531e-05	0.000254705	0.00038585	0.000359974	0.000254705	0.0319026	0.00883887	0.0318451	0.0484325	0.0421834	0.0319026	12	6.76753	5.05297	4.92	6.66871	5.06509	5.69486	74.2239	74.2239	74.2239	74.2239	74.2239	21.9602	25.1565	25.0434	22.8221	25.7369	24.1438	0.295865	0.338927	0.337403	0.307477	0.346747	0.325283
386148	Atp6v1f	4	+	58070614	58070647	33	58070628	1	mPAS	protein_coding		4845	0.000135206	6.55657e-05	0.000150217	0.000563282	0.000362639	0.000150217	0.0215028	0.0148494	0.0229348	0.0618967	0.0422169	0.0229348	12	4.42893	6.30762	4.30265	4.33607	6.24717	5.12449	873.834	873.834	873.834	873.834	873.834	534.92	305.086	545.952	538.321	317.531	448.362	0.612154	0.349135	0.624777	0.616045	0.363377	0.513098
484604	Arf3	7	-	129888315	129888333	18	129888322	4		protein_coding		231	0.000309789	0.000189933	9.83311e-05	0.00063746	4.38598e-05	0.000189933	0.0369848	0.0291387	0.0167887	0.0661563	0.0109674	0.0291387	12	11.9895	10.8676	11.1267	0.209512	0.326428	6.90395	40.4747	40.4747	40.4747	40.4747	40.4747	28.0211	36.7108	35.7182	25.173	23.6019	29.845	0.692312	0.907005	0.882482	0.621943	0.583127	0.737374
375868	Atp2b2	4	-	146896280	146896360	80	146896324	8	mPAS	protein_coding		32529	0.000366937	0.000504582	0.000184493	8.6344e-05	0.000160191	0.000184493	0.0416172	0.0574338	0.0263917	0.0190549	0.0255638	0.0263917	12	3.00113	3.83462	2.92673	2.60139	3.43556	3.15989	6216.41	6216.41	6216.41	6216.41	6216.41	1499.34	1349.69	1545.62	1533.72	1483.37	1482.35	0.241191	0.217117	0.248636	0.246721	0.238621	0.238457
215651	Nol7	17	-	21303651	21303691	40	21303655	2	mPAS	protein_coding		2766	7.35941e-05	0.00014782	1.51251e-05	0.00101468	5.26814e-05	7.35941e-05	0.0135879	0.0249698	0.0050134	0.0854725	0.0124851	0.0135879	12	0.417539	10.2799	10.8045	11.9187	11.4468	8.9735	529.644	529.644	529.644	529.644	529.644	121.899	192.483	196.113	156.945	180.741	169.636	0.230152	0.363419	0.370274	0.296322	0.341249	0.320283
243677	Rell2	18	+	29793977	29794000	23	29793983	2	mPAS	protein_coding		1853	0.000178893	0.000111285	0.000440129	0.000240949	0.000353959	0.000240949	0.0254758	0.0210694	0.0452336	0.0363711	0.0418765	0.0363711	12	6.21315	6.57598	5.79223	4.62452	6.49065	5.93931	336.709	336.709	336.709	336.709	336.709	83.6708	72.9256	92.8759	93.6029	75.1183	83.6387	0.248496	0.216583	0.275834	0.277993	0.223096	0.2484
263081	Gpr150	2	-	5548565	5548593	28	5548570	1		protein_coding	XM_006231713.4	501	0.000222386	4.9616e-05	0.000281221	0.000443474	0.000333907	0.000281221	0.0297988	0.0126052	0.0343159	0.053217	0.0412602	0.0343159	12	8.13528	7.29495	8.13498	8.08573	6.95909	7.72201	91.7239	91.7239	91.7239	91.7239	91.7239	34.5612	36.5702	35.484	34.841	34.5937	35.21	0.376796	0.398698	0.386856	0.379847	0.37715	0.38387
341258	Spout1	3	+	13451752	13451763	11	13451760	3	mPAS	protein_coding	XM_006233842.3	1232	2.82435e-05	3.57285e-05	8.91548e-06	0.00122742	5.66828e-05	3.57285e-05	0.00700726	0.0107041	0.00358391	0.0943807	0.013044	0.0107041	12	6.42906	6.53662	6.35451	6.55833	6.55546	6.4868	235.221	235.221	235.221	235.221	235.221	47.4576	44.6311	49.1397	44.4341	44.3713	46.0068	0.201757	0.189741	0.208908	0.188904	0.188636	0.195589
149924	Kcnj9	13	+	84785498	84785516	18	84785514	3		protein_coding	NM_053834.2	56	0.00034039	0.000194582	0.000377216	0.000177091	0.0003067	0.0003067	0.039444	0.0297084	0.0410248	0.030236	0.0395378	0.039444	12	7.90539	7.04032	5.04767	7.826	6.76573	6.91702	9.36132	9.36132	9.36132	9.36132	9.36132	6.89692	10.9447	10.8695	7.38177	11.5222	9.52302	0.736747	1.16914	1.16111	0.78854	1.23083	1.01727
267094	Itga1	2	-	46701816	46701826	10	46701820	3		protein_coding		371	0.000192836	0.000382207	0.00037569	0.000353265	0.000184782	0.000353265	0.0270968	0.047599	0.0410248	0.0469277	0.0283485	0.0410248	12	10.2326	10.5242	9.57508	9.86398	9.99695	10.0386	59.5515	59.5515	59.5515	59.5515	59.5515	56.427	53.1735	61.3019	58.1856	60.2316	57.8639	0.947533	0.8929	1.02939	0.977064	1.01142	0.971662
144255	-	13	+	22638001	22638003	2	22638001				-	5660	0.000257739	0.000427157	0.000549809	4.515e-05	0.00024484	0.000257739	0.0320981	0.0511895	0.0509047	0.0129853	0.0337366	0.0337366	12	8.84378	10.8155	10.1154	9.66885	8.87864	9.66442	1044.47	1044.47	1044.47	1044.47	1044.47	510.176	461.803	548.296	575.528	510.01	521.163	0.488453	0.44214	0.52495	0.551022	0.488294	0.498972
83574	Pkd1	10	+	13620724	13620745	21	13620725	2		protein_coding		206	8.24643e-05	5.07897e-05	0.000263127	0.000964077	0.000198316	0.000198316	0.0147956	0.012801	0.0325141	0.0832741	0.029694	0.029694	12	4.48542	3.73856	4.82905	3.47932	3.44683	3.99584	37.6905	37.6905	37.6905	37.6905	37.6905	24.5291	27.8601	23.19	25.9655	27.2075	25.7504	0.650803	0.73918	0.615274	0.688914	0.721866	0.683207
62633	Emx2	1	+	258633583	258633599	16	258633586	1	mPAS	protein_coding	NM_001109169.2	840	0.000119974	0.000637671	0.000368512	9.8754e-05	0.000349739	0.000349739	0.0196393	0.0661782	0.0404942	0.0207691	0.0415979	0.0404942	12	7.95963	7.109	8.09691	5.98245	6.52773	7.13514	155.52	155.52	155.52	155.52	155.52	26.7539	38.3603	23.8562	43.249	42.5554	34.9549	0.172028	0.246658	0.153396	0.278092	0.273632	0.224761
129638	Anapc5	12	+	33781701	33781718	17	33781706	2	mPAS	protein_coding	XM_006249363.3	1742	0.000287229	0.000248284	0.00019416	0.000576633	0.000281256	0.000281256	0.0345513	0.0341926	0.0268393	0.0621951	0.0374975	0.0345513	12	4.18877	6.3178	5.03227	4.19905	6.30254	5.20809	312.989	312.989	312.989	312.989	312.989	196.132	106.985	190.426	193.13	107.442	158.823	0.626642	0.341817	0.60841	0.617051	0.343278	0.50744
39136	LOC108349548	1	+	77292496	77292499	3	77292496	1	mPAS	protein_coding	XM_017589994.2	484	0.000199476	0.000429329	0.000138345	0.000105997	0.000723674	0.000199476	0.027784	0.0512564	0.0219075	0.021717	0.0636156	0.027784	12	4.67196	6.69533	6.6529	6.57599	6.64257	6.24775	91.2981	91.2981	91.2981	91.2981	91.2981	38.4417	31.0699	31.1832	33.0138	31.1683	32.9754	0.421057	0.340313	0.341554	0.361604	0.34139	0.361184
232411	Aqp4	18	-	6511588	6511593	5	6511588	5		protein_coding		64	0.000672388	0.000346503	0.000296559	0.000126619	0.000201228	0.000296559	0.0583799	0.0445501	0.035539	0.02437	0.0297373	0.035539	12	5.20577	8.01214	8.03294	7.91328	6.51271	7.13537	10.6978	10.6978	10.6978	10.6978	10.6978	9.26179	6.89722	6.68583	7.6818	11.1526	8.33585	0.865768	0.644734	0.624974	0.718075	1.04252	0.779213
7988	Calm3	1	-	77590583	77590684	101	77590668	5		protein_coding		49792	0.000209273	6.08947e-05	6.99793e-05	0.00117938	0.000139237	0.000139237	0.0288325	0.0142194	0.0133875	0.0921058	0.02303	0.02303	12	6.48214	4.52071	6.5462	6.20553	5.35268	5.82145	9436.2	9436.2	9436.2	9436.2	9436.2	1735.04	2323.88	1689.13	1969.23	2388.45	2021.15	0.183871	0.246273	0.179005	0.208689	0.253116	0.214191
145571	Rab29	13	+	43313383	43313384	1	43313384	3	mPAS	protein_coding		74	0.000236475	0.000217856	0.000361884	0.000370355	0.000477877	0.000361884	0.031032	0.0320299	0.0402876	0.0474889	0.0511609	0.0402876	12	4.70086	6.68007	6.35038	5.01533	6.11991	5.77331	13.08	13.08	13.08	13.08	13.08	16.2153	13.4442	15.1954	17.0471	16.1405	15.6085	1.2397	1.02785	1.16173	1.3033	1.23399	1.19331
123720	Fam222a	12	-	41986578	41986617	39	41986610	1		protein_coding		1785	0.000279074	0.000182181	0.000475829	0.000209038	0.000529243	0.000279074	0.0338265	0.0285171	0.0468607	0.0338541	0.0534704	0.0338541	12	6.91536	6.90062	6.90435	6.32463	5.13069	6.43513	329.802	329.802	329.802	329.802	329.802	96.1138	97.6548	96.6951	110.007	106.164	101.327	0.291429	0.296101	0.293191	0.333554	0.321902	0.307235
508257	Lingo1	8	-	57011900	57011948	48	57011924	6		protein_coding		2630	4.32103e-05	0.000386122	0.000310432	0.000849018	0.000108374	0.000310432	0.00921791	0.0477124	0.0365126	0.0768155	0.0192925	0.0365126	12	0.295058	11.324	0.448021	10.7437	0.515231	4.66518	487.363	487.363	487.363	487.363	487.363	90.977	118.744	84.0256	123.31	81.5604	99.7235	0.186672	0.243647	0.172409	0.253015	0.16735	0.204618
94753	Atp6v0a1	10	+	85946426	85946457	31	85946426	3		protein_coding		94	0.000487745	0.000149507	0.000293378	0.000432093	0.000348108	0.000348108	0.0490168	0.0251211	0.0352909	0.0527768	0.0415597	0.0415597	12	5.12759	7.33582	8.05924	6.53575	6.24279	6.66024	15.992	15.992	15.992	15.992	15.992	12.756	12.8683	8.83808	15.111	15.3181	12.9783	0.797648	0.804668	0.552656	0.944908	0.957858	0.811548
104115	Lsamp	11	-	58571126	58571171	45	58571133	24		protein_coding		1074	0.000403384	0.000509859	0.000237229	3.43854e-05	0.00052712	0.000403384	0.0438707	0.0576213	0.0302099	0.0108117	0.0534704	0.0438707	12	10.0795	0.0984501	11.5159	0.131651	11.5597	6.67704	191.165	191.165	191.165	191.165	191.165	113.345	59.8539	86.2878	58.0624	84.8302	80.4759	0.59292	0.313101	0.451379	0.30373	0.443754	0.420977
523329	Nptn	8	+	59063381	59063424	43	59063395	4	mPAS	protein_coding		8319	6.64816e-05	0.00018817	0.000532296	0.000737409	0.000198605	0.000198605	0.0124192	0.0290083	0.0503099	0.072806	0.029694	0.029694	12	0.86445	1.79903	1.79154	0.769198	1.04328	1.2535	1562.6	1562.6	1562.6	1562.6	1562.6	261.914	241.873	245.432	265.529	261.328	255.215	0.167614	0.154788	0.157066	0.169928	0.167239	0.163327
73540	-	10	-	65358072	65358096	24	65358088				-	1131	0.000611821	0.000733939	0.000283112	4.2421e-05	0.000105316	0.000283112	0.055403	0.07216	0.0343159	0.0123593	0.0190029	0.0343159	12	1.26615	1.27797	10.8982	2.09246	1.41194	3.38934	218.366	218.366	218.366	218.366	218.366	54.0943	54.918	75.2277	25.125	52.5919	52.3914	0.247724	0.251496	0.344504	0.115059	0.240843	0.239925
511836	-	8	-	87951595	87951596	1	87951596				-	79	7.77642e-05	0.000310229	0.000301503	0.000537618	0.000550209	0.000310229	0.0142513	0.040543	0.0358607	0.0601167	0.0546246	0.040543	12	10.7236	10.0366	10.7158	0.128592	10.5368	8.42828	13.7775	13.7775	13.7775	13.7775	13.7775	14.3097	15.4821	14.5008	8.08847	15.3208	13.5404	1.03863	1.12373	1.0525	0.587078	1.11201	0.982789
187480	Cpne6	15	+	29005023	29005060	37	29005033	1	mPAS	protein_coding		5659	0.000671581	0.0002351	6.22547e-05	0.000738071	0.000111672	0.0002351	0.0583799	0.0331825	0.0126732	0.072806	0.0195931	0.0331825	12	6.36203	5.28297	4.87179	5.48587	4.30341	5.26121	1063.34	1063.34	1063.34	1063.34	1063.34	153.476	231.514	238.548	222.949	236.819	216.661	0.144333	0.217723	0.224338	0.209668	0.222712	0.203755
18364	-	1	-	152044048	152044081	33	152044056				-	386	0.000437373	0.000496457	0.000303555	0.000241657	0.000346462	0.000346462	0.045391	0.0567729	0.0359701	0.0363711	0.0415597	0.0415597	12	4.50576	3.98411	2.96318	3.13385	4.71376	3.86013	67.8354	67.8354	67.8354	67.8354	67.8354	39.7206	45.6528	48.067	48.0246	37.4112	43.7752	0.585543	0.672994	0.708582	0.707958	0.5515	0.645316
339305	Ctsz	3	-	163224870	163224878	8	163224875	1	mPAS	protein_coding	NM_183330.2	1448	3.91578e-05	0.000104834	5.90807e-05	0.00128634	0.000355712	0.000104834	0.00875728	0.0205508	0.0122015	0.0972722	0.0418765	0.0205508	12	4.17894	4.78747	4.52272	5.92311	5.75585	5.03362	281.658	281.658	281.658	281.658	281.658	93.3705	92.3133	93.3225	63.7897	69.8946	82.5381	0.331502	0.327749	0.331332	0.226479	0.248154	0.293043
270331	LOC100360846	2	-	93833857	93833868	11	93833867	1		protein_coding	NM_001329883.1	1804	0.000172635	0.000373479	8.59695e-05	0.000716107	0.00051078	0.000373479	0.0246954	0.0470998	0.0153976	0.0715139	0.0523259	0.0470998	12	5.61191	3.73395	4.64051	5.01345	3.94907	4.58978	366.291	366.291	366.291	366.291	366.291	209.062	309.12	307.04	264.702	323.296	282.644	0.570753	0.843919	0.83824	0.722654	0.882621	0.771638
362084	Chpf2	4	-	10578465	10578476	11	10578470	2	mPAS	protein_coding	XR_005503172.1	465	0.000161398	0.000582459	0.000164576	0.000375816	0.000574837	0.000375816	0.0236199	0.062071	0.0243976	0.0477392	0.0559972	0.0477392	12	6.20032	6.28471	5.51425	3.52551	6.39179	5.58332	83.1056	83.1056	83.1056	83.1056	83.1056	44.4931	42.0154	58.4708	55.2053	39.2518	47.8873	0.535381	0.505567	0.703572	0.664278	0.472313	0.576222
472693	RGD1307947	7	-	35397970	35397980	10	35397972	3		protein_coding		772	4.76754e-05	8.87255e-05	0.000432601	0.000763045	0.000530377	0.000432601	0.0097053	0.0180619	0.0448259	0.0738781	0.0534704	0.0448259	12	10.5027	10.0108	10.0327	9.73081	10.6022	10.1758	139.379	139.379	139.379	139.379	139.379	32.0398	39.4055	38.9326	40.2212	31.1401	36.3478	0.229876	0.282723	0.27933	0.288575	0.223421	0.260785
262040	Rab4a	19	+	51822693	51822723	30	51822704	1	mPAS	protein_coding		7239	0.000115195	0.000240912	7.73575e-05	0.00103535	0.000402831	0.000240912	0.0189547	0.0337033	0.0143663	0.0860727	0.0455256	0.0337033	12	6.11844	5.82361	6.17019	4.27726	5.81082	5.64006	1360.76	1360.76	1360.76	1360.76	1360.76	161.128	182.068	157.455	220.605	184.001	181.051	0.11841	0.133799	0.115711	0.162119	0.13522	0.133052
113059	-	11	+	46045192	46045194	2	46045193				-	77	0.000233475	0.00108911	0.000364701	9.83028e-05	9.39738e-05	0.000233475	0.0307655	0.0896033	0.0403547	0.0207691	0.0177638	0.0307655	12	9.89632	8.81505	8.81103	9.16373	8.82987	9.1032	14.4031	14.4031	14.4031	14.4031	14.4031	18.7865	18.706	18.4592	19.293	19.1211	18.8732	1.30434	1.29875	1.28162	1.3395	1.32757	1.31036
178772	Bmp1	15	-	45551603	45551626	23	45551606	2	mPAS	protein_coding		2181	4.34827e-05	0.000252382	0.000194954	0.000866705	0.000543093	0.000252382	0.00921791	0.034547	0.0268393	0.0779716	0.054407	0.034547	12	4.49877	4.38485	6.31115	6.29712	6.10883	5.52014	411.202	411.202	411.202	411.202	411.202	116.836	118.541	72.9472	73.4682	81.8999	92.7385	0.284133	0.28828	0.1774	0.178667	0.199172	0.22553
486057	Itga7	7	+	1388882	1388891	9	1388888	1	mPAS	protein_coding	NM_030842.1	358	0.00024069	0.000952331	0.000209764	0.000425024	0.000222233	0.00024069	0.0313261	0.0840089	0.0282266	0.0523159	0.0321659	0.0321659	12	5.84	4.96991	6.67831	5.757	6.73837	5.99672	63.7831	63.7831	63.7831	63.7831	63.7831	26.8097	25.575	22.3764	26.8423	21.9394	24.7085	0.420326	0.400967	0.35082	0.420837	0.343968	0.387384
318592	Micu1	20	+	27814940	27814974	34	27814960	2		protein_coding		1596	0.000230455	0.000357353	0.000168103	0.00115913	0.000143979	0.000230455	0.0305337	0.0453938	0.0244883	0.091115	0.0236909	0.0305337	12	8.10556	4.95554	6.84362	5.7917	4.99366	6.13802	294.377	294.377	294.377	294.377	294.377	34.97	76.8748	78.2461	87.3171	77.2882	70.9393	0.118793	0.261144	0.265802	0.296616	0.262548	0.240981
481503	Elfn2	7	-	110221518	110221546	28	110221530	3		protein_coding		8482	0.00031874	0.000569079	0.000211551	0.000938475	3.36499e-05	0.00031874	0.0376291	0.0611436	0.028347	0.0821023	0.00929234	0.0376291	12	11.74	10.7501	10.8894	11.7079	11.1294	11.2434	1560.94	1560.94	1560.94	1560.94	1560.94	258.936	296.512	300.067	261.202	289.599	281.263	0.165885	0.189957	0.192234	0.167336	0.185529	0.180188
118938	Kdelr2	12	-	11138818	11138826	8	11138825	1	mPAS	protein_coding	NM_001013122.2	3437	4.93399e-05	0.00107773	5.60576e-05	0.000610648	0.000303599	0.000303599	0.00991702	0.0891289	0.011712	0.0640011	0.039514	0.039514	12	10.8062	9.06661	10.0086	10.8235	10.6407	10.2691	624.187	624.187	624.187	624.187	624.187	127.84	145.493	153.192	123.698	131.129	136.27	0.204811	0.233093	0.245426	0.198174	0.21008	0.218316
419985	-	5	+	790922	790927	5	790927				-	121	0.000522534	6.98927e-05	0.000317523	0.000676845	0.000510786	0.000510786	0.0501454	0.0156309	0.037072	0.0686727	0.0523259	0.0501454	12	10.7959	10.4901	10.7088	0.2245	11.7652	8.79689	24.1316	24.1316	24.1316	24.1316	24.1316	29.5716	31.0373	29.9917	15.1131	21.3525	25.4133	1.22543	1.28617	1.24284	0.626278	0.884835	1.05311
369324	LOC120102161	4	-	74071229	74071230	1	74071230	1		lncRNA		312	0.000513994	7.94913e-05	0.000167352	0.000356403	0.000999315	0.000356403	0.0501454	0.0167179	0.0244883	0.0469277	0.0766552	0.0469277	12	9.82744	9.94977	9.89557	11.3642	8.98888	10.0052	57.4756	57.4756	57.4756	57.4756	57.4756	26.4657	26.2575	26.4256	20.472	23.9874	24.7217	0.460469	0.456846	0.459771	0.356186	0.417348	0.430124
229193	-	17	+	69660366	69660370	4	69660369				-	376	0.000836643	0.000187749	0.000334249	0.000284975	0.000504694	0.000334249	0.0669844	0.0290083	0.0380742	0.0403855	0.0523259	0.0403855	12	9.01936	10.5831	10.4563	0.0987117	10.1301	8.05753	61.4166	61.4166	61.4166	61.4166	61.4166	42.7533	43.5473	44.4145	17.5977	47.7544	39.2134	0.696119	0.709048	0.723169	0.28653	0.777549	0.638483
171470	-	14	+	81345535	81345561	26	81345535				-	483	0.00021632	0.000437411	0.000298832	0.000930113	0.000347062	0.000347062	0.0295066	0.0518316	0.0356768	0.0815956	0.0415597	0.0415597	12	11.1572	0.689421	10.7996	11.8857	0.500147	7.00643	85.4305	85.4305	85.4305	85.4305	85.4305	32.8749	25.8677	31.8112	32.2539	28.0251	30.1665	0.384814	0.302792	0.372363	0.377545	0.328046	0.353112
500815	Copz1	7	+	134435510	134435541	31	134435512	2		protein_coding	NM_001108117.1	139	0.000375626	0.000271575	0.000376662	0.000781519	0.00049503	0.000376662	0.0421511	0.0365441	0.0410248	0.0742721	0.0519487	0.0421511	12	4.32998	6.19688	5.80893	4.02902	4.33583	4.94013	22.9085	22.9085	22.9085	22.9085	22.9085	22.6912	12.1056	15.7451	22.8199	23.1167	19.2957	0.990516	0.528435	0.687302	0.996132	1.00909	0.842294
540105	Spag16	9	-	71685718	71685719	1	71685719	3		protein_coding	XM_039084102.1	34	0.000216984	0.000780831	0.000413425	0.000781677	0.000138458	0.000413425	0.0295066	0.0739942	0.043474	0.0742721	0.02303	0.043474	12	7.95213	9.20833	9.15142	11.5317	0.447211	7.65815	6.78767	6.78767	6.78767	6.78767	6.78767	6.65513	10.7939	10.9466	6.88635	1.971	7.45061	0.980473	1.59023	1.61272	1.01454	0.29038	1.09767
444180	Hectd1	6	-	69181419	69181436	17	69181434	2	mPAS	protein_coding		2997	0.000346239	0.000545311	0.000411034	0.000946634	9.83869e-05	0.000411034	0.039695	0.0597215	0.0433661	0.0821374	0.0182718	0.0433661	12	11.5611	10.5778	11.1622	11.8299	11.9984	11.4259	559.19	559.19	559.19	559.19	559.19	107.118	111.119	111.34	100.468	96.1954	105.248	0.191559	0.198713	0.19911	0.179667	0.172026	0.188215
436119	Pla2g2a	5	+	151079018	151079018	0	151079018	1	mPAS	protein_coding		71	0.000654523	0.00013271	0.000282571	0.0005794	0.000720075	0.0005794	0.0578988	0.0230644	0.0343159	0.0621951	0.0636156	0.0578988	12	6.80979	6.23535	7.18898	6.57702	7.55145	6.87252	12.3178	12.3178	12.3178	12.3178	12.3178	17.4909	17.3154	16.0633	17.5025	15.0109	16.6766	1.41997	1.40572	1.30407	1.42091	1.21863	1.35386
393577	Dctn1	4	+	115703807	115703831	24	115703816	1	mPAS	protein_coding	NM_024130.2	8510	0.000532909	0.00085688	0.000196599	0.000346198	0.000441757	0.000441757	0.0508216	0.0784206	0.0269111	0.0467839	0.0484736	0.0484736	12	4.65228	6.235	6.39692	4.50058	5.63711	5.48438	1626.38	1626.38	1626.38	1626.38	1626.38	629.262	477.325	436.138	607.757	577.907	545.678	0.386911	0.29349	0.268166	0.373688	0.355334	0.335518
504724	Foxred1	8	-	33552719	33552752	33	33552719	2		misc_RNA		70	0.000428035	0.000920629	0.000216294	0.000514116	0.000313035	0.000428035	0.0447701	0.0823785	0.0288607	0.0587295	0.0399239	0.0447701	12	6.62141	8.11282	8.36532	7.00409	8.64323	7.74937	11.3146	11.3146	11.3146	11.3146	11.3146	11.3346	10.8941	9.7783	12.13	8.89738	10.6069	1.00177	0.962838	0.864224	1.07207	0.786366	0.937454
359590	-	3	+	159855478	159855478	0	159855478				-	460	0.000147229	0.00122148	7.38983e-05	0.000444075	0.000507769	0.000444075	0.0228076	0.0951249	0.013969	0.053217	0.0523259	0.0523259	12	5.64067	3.95401	4.01044	4.00969	5.66716	4.65639	84.348	84.348	84.348	84.348	84.348	48.3832	66.8859	68.8471	66.1432	47.7827	59.6084	0.573614	0.792975	0.816226	0.784171	0.566495	0.706696
564506	Htr2c	X	-	110728659	110728661	2	110728660	4		protein_coding		1019	0.000396113	0.000417251	0.000555304	0.000436363	0.000607797	0.000436363	0.0436401	0.0503827	0.0512307	0.0528916	0.0576735	0.0512307	12	11.8727	11.6914	11.9621	10.6348	10.0556	11.2433	173.794	173.794	173.794	173.794	173.794	77.9156	89.1496	72.245	132.918	147.843	104.014	0.448322	0.512962	0.415694	0.764801	0.850682	0.598492
384928	Met	4	+	45898129	45898141	12	45898131	3	mPAS	protein_coding		327	0.000171112	0.00136644	0.0003345	0.000467499	0.000121662	0.0003345	0.0245882	0.101243	0.0380742	0.0553969	0.0209979	0.0380742	12	1.22676	2.72021	1.82631	1.68621	2.07383	1.90666	64.7553	64.7553	64.7553	64.7553	64.7553	28.8477	24.8672	29.0163	30.4253	29.6567	28.5626	0.445488	0.384018	0.448092	0.469851	0.457981	0.441086
232107	Osbpl1a	18	-	3906640	3906672	32	3906669	3		protein_coding		114	0.000780664	0.000171267	0.000220088	0.000613699	0.000678027	0.000613699	0.0638957	0.0277496	0.0288793	0.0641094	0.0616966	0.0616966	12	4.44675	6.28693	4.54017	6.52934	6.13194	5.58703	22.3966	22.3966	22.3966	22.3966	22.3966	24.5727	19.6588	23.5582	17.5337	20.8036	21.2254	1.09716	0.877759	1.05186	0.782872	0.928872	0.947706
21087	Thumpd1	1	-	174078787	174078823	36	174078822	2		protein_coding		46	0.000986172	0.000199199	0.000437396	0.00033265	0.000509614	0.000437396	0.0720899	0.0302677	0.0450987	0.0455344	0.0523259	0.0455344	12	1.04021	4.19389	3.15757	2.60964	2.14177	2.62862	9.7135	9.7135	9.7135	9.7135	9.7135	9.07026	4.83606	8.76892	10.5702	10.9164	8.83237	0.933778	0.49787	0.902756	1.0882	1.12383	0.909288
453066	Slc8a1	6	+	13542633	13542636	3	13542635	5		protein_coding		195	0.0010189	0.000525615	0.000114312	0.000662231	0.000168382	0.000525615	0.0736402	0.0583635	0.0188094	0.0676221	0.0263414	0.0583635	12	6.44932	6.35346	6.32658	5.92924	4.41097	5.89391	41.0713	41.0713	41.0713	41.0713	41.0713	25.0742	26.5433	27.0528	31.7492	35.8319	29.2503	0.610505	0.646274	0.658679	0.773028	0.872431	0.712183
250774	-	19	-	16266700	16266704	4	16266703				-	7553	0.000230755	0.00103641	0.000635313	0.000250533	0.000362919	0.000362919	0.0305337	0.0878879	0.0550075	0.0371784	0.0422169	0.0422169	12	10.5843	11.9553	10.9793	9.77553	9.8531	10.6295	1352.49	1352.49	1352.49	1352.49	1352.49	716.93	348.899	655.091	769.857	821.822	662.52	0.530084	0.257969	0.484361	0.569217	0.607638	0.489854
454975	Itsn2	6	+	27653779	27653879	100	27653836	7		protein_coding		126	0.000428073	0.000699613	0.000496259	0.000446438	0.000456387	0.000456387	0.0447701	0.0703089	0.0479018	0.053299	0.0494658	0.0494658	12	8.08786	6.92989	6.08166	8.21405	8.16561	7.49582	20.7496	20.7496	20.7496	20.7496	20.7496	15.3767	24.5926	25.0415	14.4721	15.4041	18.9774	0.741059	1.18521	1.20684	0.697462	0.742379	0.91459
452415	Pigf	6	+	7593833	7593839	6	7593833	1		protein_coding		113	0.000486369	0.00150751	0.000109055	0.000263635	0.000202145	0.000263635	0.0490168	0.106387	0.0182277	0.0378835	0.0297373	0.0378835	12	6.59734	7.55006	6.63109	8.26811	8.46007	7.50133	19.0696	19.0696	19.0696	19.0696	19.0696	15.7861	16.6894	15.8858	14.7527	12.7865	15.1801	0.827813	0.875183	0.833042	0.773623	0.67052	0.796036
245557	LOC108348794	18	+	48411942	48411956	14	48411954	2		lncRNA		266	0.000254687	0.000802692	4.47409e-05	0.00142436	0.00011565	0.000254687	0.0319514	0.0751313	0.0101633	0.103856	0.0200694	0.0319514	12	5.97596	4.442	5.8338	4.46119	6.46103	5.4348	48.9269	48.9269	48.9269	48.9269	48.9269	15.649	18.7307	16.4063	19.3318	12.5797	16.5395	0.319845	0.38283	0.335322	0.395115	0.257112	0.338045
101561	Setd4	11	-	32838059	32838067	8	32838062	1		protein_coding		769	0.000621609	0.000115717	0.000466476	0.00038475	0.00105893	0.000466476	0.055764	0.0214321	0.0467315	0.0484325	0.079126	0.0484325	12	6.23694	4.24383	4.27776	6.29477	6.05589	5.42184	140.534	140.534	140.534	140.534	140.534	39.777	58.6129	59.1553	38.386	43.7585	47.9379	0.283042	0.417074	0.420933	0.273144	0.311374	0.341113
140739	Hnrnpu	13	-	90077737	90077772	35	90077757	9		protein_coding		9718	0.000368305	0.000247913	0.000269613	0.000928179	0.000855407	0.000368305	0.0416237	0.0341926	0.0330584	0.0815956	0.0707426	0.0416237	12	9.09415	9.30999	8.89972	9.76051	10.8427	9.58142	1792.05	1792.05	1792.05	1792.05	1792.05	277.58	281	272.824	280.091	242.316	270.762	0.154895	0.156803	0.152241	0.156296	0.135217	0.151091
551664	Erbb4	9	+	69680172	69680172	0	69680172	5		protein_coding	XM_039084150.1	96	0.000389545	0.000831072	0.000397494	0.000604476	0.000478645	0.000478645	0.0432545	0.0767219	0.0423598	0.0637752	0.0511609	0.0511609	12	10.4015	10.5861	9.01068	10.9056	9.83255	10.1473	17.5583	17.5583	17.5583	17.5583	17.5583	15.394	14.7392	13.8806	13.6225	15.822	14.6917	0.876737	0.839442	0.790544	0.775847	0.901112	0.836737
378983	Grin2b	4	-	168586008	168586053	45	168586027	7		protein_coding		348	0.000706992	0.000447518	0.000557045	0.000144202	0.000858571	0.000557045	0.0602053	0.0523756	0.0512307	0.0267803	0.0708199	0.0523756	12	4.90307	6.41731	5.44014	6.38302	4.59653	5.54802	67.1705	67.1705	67.1705	67.1705	67.1705	46.0007	27.9527	42.5768	28.1676	46.8256	38.3047	0.684835	0.416146	0.633862	0.419345	0.697116	0.570261
201753	Arhgef10	16	-	74647144	74647175	31	74647152	3	mPAS	protein_coding		615	0.000400389	0.000550041	0.000653499	0.000776878	0.00034195	0.000550041	0.0438453	0.0600263	0.0551946	0.0742721	0.0415597	0.0551946	12	2.22088	1.79983	0.773232	2.42088	1.57412	1.75779	112.231	112.231	112.231	112.231	112.231	27.3547	33.0306	38.5441	25.3399	35.5481	31.9635	0.243735	0.294309	0.343435	0.225783	0.31674	0.2848
500893	LOC120094355	8	-	463340	463347	7	463345	1		lncRNA		243	0.000597696	0.000772451	0.000717112	0.000516183	0.000171282	0.000597696	0.0548584	0.0736658	0.0588458	0.0587542	0.0265898	0.0587542	12	8.95734	9.34822	10.9478	9.30918	9.04224	9.52095	44.8476	44.8476	44.8476	44.8476	44.8476	44.0401	47.7919	42.5413	49.0332	46.8193	46.0451	0.981995	1.06565	0.948574	1.09333	1.04396	1.0267
481715	-	7	-	111043231	111043256	25	111043232				-	459	0.000523517	0.000284996	0.0011517	0.000361159	0.000463902	0.000463902	0.0501454	0.0378687	0.0782797	0.0469277	0.0499394	0.0499394	12	0.605331	11.9196	0.265723	0.576916	11.9011	5.05374	86.3171	86.3171	86.3171	86.3171	86.3171	33.522	40.1557	37.2256	34.0251	40.3524	37.0562	0.388359	0.465212	0.431266	0.394188	0.467491	0.429303
426214	-	5	+	71873034	71873034	0	71873034				-	285	0.000121232	0.00113533	0.000194175	0.00037235	0.000963726	0.00037235	0.0197435	0.0915093	0.0268393	0.0474889	0.0752079	0.0474889	12	4.46058	4.51264	6.32168	5.06493	6.30491	5.33295	59.4703	59.4703	59.4703	59.4703	59.4703	57.1744	55.2476	32.7903	52.6819	33.383	46.2555	0.961395	0.928996	0.551373	0.885852	0.56134	0.777791
44742	Apba2	1	+	118285700	118285715	15	118285714	4		protein_coding		277	0.000462225	8.48729e-05	0.000728284	0.00143842	8.31491e-05	0.000462225	0.0470678	0.017502	0.0593282	0.104292	0.0161998	0.0470678	12	6.89703	6.79367	4.9587	5.87706	4.99188	5.90367	50.9642	50.9642	50.9642	50.9642	50.9642	26.3394	26.9228	27.225	30.742	27.2947	27.7048	0.516821	0.528269	0.534199	0.603208	0.535567	0.543613
371261	Kcmf1	4	-	104888453	104888477	24	104888453	6	mPAS	protein_coding	XM_039108353.1	183	0.000252392	0.00119582	0.000460372	0.000442042	0.000452837	0.000452837	0.0319026	0.0951249	0.0462659	0.053217	0.0492492	0.0492492	12	7.71268	7.51603	7.08898	8.83623	8.53864	7.93851	33.8274	33.8274	33.8274	33.8274	33.8274	17.2625	16.9918	15.9292	14.4226	15.6726	16.0557	0.510312	0.502309	0.470897	0.426357	0.463312	0.474637
19810	Dennd5a	1	-	163928165	163928194	29	163928185	4	mPAS	protein_coding		11504	0.00016918	0.000276305	0.000221556	0.0015121	0.000656604	0.000276305	0.0245327	0.0368682	0.0288793	0.107457	0.0607924	0.0368682	12	5.20829	6.73862	6.44529	4.7699	5.21377	5.67517	2103.74	2103.74	2103.74	2103.74	2103.74	473.262	389.031	423.955	442.712	477.559	441.304	0.224962	0.184924	0.201525	0.210441	0.227005	0.209771
95194	Nmt1	10	+	87989350	87989385	35	87989367	4		protein_coding		845	0.000501769	0.000561037	0.00066565	0.000555054	0.000554921	0.000555054	0.050109	0.0608084	0.0559234	0.06139	0.0547287	0.0559234	12	0.351579	11.1521	0.194262	0.469341	11.6876	4.77098	167.375	167.375	167.375	167.375	167.375	40.0112	47.8078	42.3065	38.9671	47.2452	43.2676	0.239052	0.285633	0.252765	0.232814	0.282272	0.258507
60813	Kazald1	1	+	243942768	243942777	9	243942772	1		protein_coding		128	0.000406487	0.000181087	0.000622287	0.000783485	0.000881578	0.000622287	0.0440573	0.0285171	0.0548162	0.0742721	0.0716017	0.0548162	12	7.82479	6.89248	6.59875	6.55833	6.92691	6.96025	24.3251	24.3251	24.3251	24.3251	24.3251	16.1453	19.5082	19.787	19.5722	19.4041	18.8834	0.66373	0.80198	0.813438	0.804609	0.7977	0.776291
387372	LOC102553126	4	+	63829271	63829271	0	63829271	1	mPAS	lncRNA		66	0.00094829	0.000512681	0.000805332	0.000193279	0.000442653	0.000512681	0.0706582	0.0577348	0.0644205	0.0320285	0.0484736	0.0577348	12	6.68878	6.31327	5.0644	5.13568	5.17805	5.67604	11.5993	11.5993	11.5993	11.5993	11.5993	12.6119	13.2019	11.8096	11.8325	12.0267	12.2965	1.0873	1.13817	1.01814	1.02011	1.03685	1.06011
97948	Rac3	10	+	106005236	106005259	23	106005244	1	mPAS	protein_coding		845	0.000252791	0.000678761	0.000890666	0.000107471	0.00101075	0.000678761	0.0319026	0.0688671	0.0684237	0.0218779	0.0771596	0.0684237	12	4.98021	3.66396	3.17202	3.56235	4.40088	3.95588	159.303	159.303	159.303	159.303	159.303	77.8541	92.5435	86.9666	90.6531	90.162	87.6358	0.488718	0.580929	0.54592	0.569062	0.565979	0.550122
446277	-	6	-	89746586	89746598	12	89746590				-	9147	0.000379588	0.00141825	0.000521612	0.000354081	0.000279562	0.000379588	0.0424457	0.102595	0.0497442	0.0469277	0.0374601	0.0469277	12	9.81639	9.17005	10.3009	9.63801	10.0943	9.80394	1613.5	1613.5	1613.5	1613.5	1613.5	941.467	903.763	912.94	936.456	964.264	931.778	0.583492	0.560124	0.565812	0.580387	0.597621	0.577487
295215	-	2	+	119051228	119051228	0	119051228				-	161	9.95978e-05	0.00111483	0.000308804	0.000873307	0.000577316	0.000577316	0.0172837	0.0910123	0.0364561	0.0783435	0.0560668	0.0560668	12	5.35623	3.70343	5.13916	3.85642	6.07564	4.82617	31.9838	31.9838	31.9838	31.9838	31.9838	22.0648	31.9516	25.1567	31.1961	11.6225	24.3984	0.689874	0.998992	0.786546	0.975373	0.363386	0.762834
225430	Ssr1	17	+	26849695	26849713	18	26849701	7		protein_coding		492	0.000151527	0.000118496	0.000164084	0.00115189	0.00139834	0.000164084	0.0231348	0.0214321	0.0243976	0.090771	0.0954989	0.0243976	12	6.50639	4.42599	4.88582	6.40637	4.44101	5.33311	91.9246	91.9246	91.9246	91.9246	91.9246	24.8305	35.4592	36.9605	25.9877	36.3316	31.9139	0.270118	0.385743	0.402074	0.282707	0.395232	0.347175
442106	Rock2	6	-	39682899	39682899	0	39682899	5		protein_coding	XM_008764574.2	63	0.000251382	0.00188036	0.00038786	0.000204472	0.00028941	0.00028941	0.0319026	0.120989	0.0414723	0.0334713	0.038295	0.038295	12	6.69229	4.71075	5.21919	6.00207	4.71067	5.467	13.432	13.432	13.432	13.432	13.432	12.4901	14.9095	15.9896	15.218	14.9882	14.7191	0.929875	1.10999	1.19041	1.13296	1.11586	1.09582
351114	Rtf1	3	+	106677119	106677145	26	106677128	10		protein_coding		49	0.000428866	0.00021669	0.000823337	0.00132284	0.000271086	0.000428866	0.0447701	0.0320115	0.0655306	0.0986248	0.0364784	0.0447701	12	0.787499	2.53125	2.04089	0.643638	0.828085	1.36627	10.2616	10.2616	10.2616	10.2616	10.2616	12.2776	9.1664	11.3534	12.2236	12.4625	11.4967	1.19645	0.893269	1.10639	1.19119	1.21447	1.12036
126494	Prkar1b	12	+	15624875	15624946	71	15624930	2	mPAS	protein_coding		50808	0.000345068	0.000764239	0.000112643	0.00163799	0.000237207	0.000345068	0.039695	0.0733231	0.0187289	0.110577	0.0333318	0.039695	12	6.32734	4.98353	6.48179	5.75828	6.4801	6.00621	9469.46	9469.46	9469.46	9469.46	9469.46	1872.14	2479.93	1730.66	2256.36	1734.34	2014.69	0.197703	0.261887	0.182762	0.238278	0.183151	0.212756
304390	LOC120100935	2	+	209456791	209456803	12	209456794	2		lncRNA		103	0.000521652	0.000522169	0.00131423	0.000227369	0.000514435	0.000521652	0.0501454	0.0583635	0.0851757	0.0352222	0.0525302	0.0525302	12	2.4178	1.33247	0.936871	0.930502	0.361226	1.19577	18.3148	18.3148	18.3148	18.3148	18.3148	8.2166	12.0211	12.7967	12.8806	12.786	11.7402	0.448631	0.656358	0.698707	0.703288	0.698123	0.641022
429317	Pgm1	5	+	114654722	114654732	10	114654728	1	mPAS	protein_coding	XM_006238442.4	2213	0.000223731	0.00228192	5.91691e-05	0.000257162	0.000319277	0.000257162	0.029853	0.13395	0.0122015	0.0374618	0.0403627	0.0374618	12	4.67146	4.13235	3.21661	3.13578	3.79337	3.78991	404.442	404.442	404.442	404.442	404.442	114.571	138.508	155.132	152.45	145.12	141.156	0.283281	0.342468	0.383571	0.376938	0.358814	0.349014
108039	Fam131a	11	-	80211571	80211599	28	80211585	2	mPAS	protein_coding	XM_008768832.3	9588	0.000217418	0.000567733	0.00040957	0.0016413	0.000328725	0.00040957	0.0295066	0.0611436	0.0433558	0.110577	0.0409149	0.0433558	12	0.178026	0.671306	11.9567	0.419845	11.8234	5.00984	1809.35	1809.35	1809.35	1809.35	1809.35	374.44	322.681	391.856	351.037	398.501	367.703	0.206948	0.178341	0.216573	0.194013	0.220246	0.203224
377869	Tpi1	4	-	157615232	157615317	85	157615284	4		protein_coding		1032	0.000386702	0.00234815	0.000219479	0.00015303	6.51475e-05	0.000219479	0.0430895	0.136576	0.0288793	0.0274564	0.013979	0.0288793	12	5.88392	6.76486	5.29369	6.85571	6.92794	6.34522	210.041	210.041	210.041	210.041	210.041	133.347	116.763	128.768	116.071	113.485	121.687	0.634862	0.555904	0.613062	0.552612	0.540299	0.579348
42000	Syt3	1	+	94895513	94895524	11	94895518	1	mPAS	protein_coding	XM_039102263.1	3056	0.000449093	0.000569906	0.000460284	0.000826194	0.000923671	0.000569906	0.0461549	0.0611436	0.0462659	0.0763568	0.0737011	0.0611436	12	4.39776	5.96333	6.38459	4.69832	4.47134	5.18307	557.167	557.167	557.167	557.167	557.167	250.471	218.466	180.076	259.424	259.029	233.493	0.449545	0.392102	0.3232	0.465612	0.464904	0.419073
508530	Islr	8	-	58571152	58571183	31	58571162	1	mPAS	protein_coding		615	0.00066337	0.000442781	0.000988621	0.000666583	0.000486806	0.00066337	0.0582771	0.0520793	0.0726751	0.0678483	0.051704	0.0582771	12	3.97833	4.21962	2.73547	3.53808	2.73847	3.442	117.499	117.499	117.499	117.499	117.499	31.0026	25.8559	46.5634	38.6263	47.1083	37.8313	0.263855	0.220053	0.396289	0.328738	0.400926	0.321972
294803	Fxr1	2	+	116936487	116936511	24	116936505	4		protein_coding		256	0.000612352	0.00108193	0.00062255	0.000736339	0.000197745	0.00062255	0.055403	0.0892434	0.0548162	0.072806	0.029694	0.055403	12	8.35483	6.71815	8.3442	6.81665	8.62961	7.77269	45.6821	45.6821	45.6821	45.6821	45.6821	13.6167	16.1816	14.0953	16.3251	13.0114	14.646	0.298075	0.354221	0.308552	0.357363	0.284824	0.320607
578767	-	Y	+	9317162	9317163	1	9317162				-	85	0.000485654	0.000590177	0.000445932	0.000626855	0.00114516	0.000590177	0.0490168	0.0624742	0.0456821	0.065269	0.0822779	0.0624742	12	10.4111	10.2732	10.6077	11.6659	10.5413	10.6998	14.6418	14.6418	14.6418	14.6418	14.6418	14.8352	15.4286	14.3831	9.37353	15.0888	13.8219	1.01321	1.05374	0.982331	0.640188	1.03053	0.943998
443456	Dock4	6	-	57685112	57685113	1	57685113	3		protein_coding	XM_039078125.1	212	0.000209727	0.00116592	0.000635694	0.000593765	0.000695299	0.000635694	0.0288325	0.0934838	0.0550075	0.0632513	0.0623746	0.0623746	12	6.38695	4.45462	6.34708	5.85317	5.62068	5.7325	44.2423	44.2423	44.2423	44.2423	44.2423	29.6681	43.0092	30.4622	37.4284	40.59	36.2316	0.670581	0.972128	0.68853	0.845986	0.917448	0.818935
170362	-	14	+	75665386	75665411	25	75665404				-	1541	0.000332535	0.00210492	0.000133261	0.000105556	0.000663844	0.000332535	0.0386824	0.127813	0.0212662	0.021717	0.0608979	0.0386824	12	3.07713	2.85993	4.84176	2.86713	4.8278	3.69475	286.772	286.772	286.772	286.772	286.772	106.252	95.5085	90.6536	97.7035	89.7706	95.9776	0.370509	0.333047	0.316118	0.340701	0.313038	0.334683
301786	Otud7b	2	+	183722556	183722591	35	183722584	5	mPAS	protein_coding	XM_006232957.4	696	0.000416043	0.00132187	0.000559784	0.0002533	0.000813815	0.000559784	0.0443781	0.0990065	0.0512307	0.0372552	0.0696015	0.0512307	12	3.58196	4.09699	3.27228	2.893	3.25669	3.42018	130.371	130.371	130.371	130.371	130.371	66.7747	65.267	67.0242	62.1575	66.5475	65.5542	0.51219	0.500625	0.514104	0.476774	0.510447	0.502828
177081	-	15	-	32198990	32198990	0	32198990				-	41	0.000514544	0.000931318	0.000949447	0.000286133	0.000714496	0.000714496	0.0501454	0.0828456	0.0706126	0.0403855	0.0635581	0.0635581	12	8.77503	9.20135	9.1024	9.32329	8.9361	9.06764	7.89136	7.89136	7.89136	7.89136	7.89136	8.80695	9.69812	9.42002	9.53539	8.93271	9.27864	1.11603	1.22895	1.19371	1.20833	1.13196	1.1758
495550	Kcnq3	7	+	97972516	97972517	1	97972516	7		protein_coding	NM_031597.4	220	0.00114011	0.000894105	0.000612499	0.000487882	0.000297964	0.000612499	0.0785389	0.0810758	0.054638	0.056962	0.039101	0.056962	12	9.80648	10.1023	10.6441	10.5916	10.9686	10.4226	40.5267	40.5267	40.5267	40.5267	40.5267	28.8094	27.6143	26.5731	27.2385	25.3742	27.1219	0.710875	0.681386	0.655694	0.672113	0.62611	0.669236
491311	LOC120093589	7	+	50368415	50368462	47	50368417	1		lncRNA		269	0.000255555	0.000355474	0.000600698	0.00163494	0.000601724	0.000600698	0.0319514	0.0453365	0.0537362	0.110577	0.0573842	0.0537362	12	0.119673	9.64562	0.128909	10.917	11.4415	6.45055	46.8083	46.8083	46.8083	46.8083	46.8083	9.75816	26.4744	9.65772	21.9633	17.2553	17.0218	0.208471	0.565593	0.206325	0.469219	0.368638	0.363649
444947	-	6	-	77919457	77919458	1	77919458				-	660	0.000951231	0.000635031	0.000207835	0.00162125	3.81794e-05	0.000635031	0.0706582	0.0661782	0.028086	0.110122	0.0101979	0.0661782	12	10.5741	10.1425	10.4496	8.92079	10.2115	10.0597	124.006	124.006	124.006	124.006	124.006	73.374	80.3782	75.4362	71.5383	81.3275	76.4108	0.591699	0.648183	0.608329	0.576896	0.655838	0.616189
462286	Mpp5	6	+	97654122	97654165	43	97654148	4	mPAS	protein_coding		1427	0.000165065	0.00190451	0.000574061	0.000168427	0.000646871	0.000574061	0.0240457	0.121449	0.0517571	0.0290693	0.0600663	0.0517571	12	8.13538	8.58532	6.53159	6.78817	7.13678	7.43545	264.658	264.658	264.658	264.658	264.658	48.8763	41.5814	53.9885	55.5813	57.0968	51.4248	0.184677	0.157114	0.203993	0.210012	0.215738	0.194307
245715	LOC102547544	18	+	50398578	50398579	1	50398579	1		lncRNA		185	0.000157963	0.00131496	0.0012013	0.00021038	0.000664673	0.000664673	0.0234405	0.098955	0.0803481	0.0338541	0.0608979	0.0608979	12	10.2442	10.0952	8.44578	8.16695	9.93216	9.37686	30.5502	30.5502	30.5502	30.5502	30.5502	15.1902	16.5292	24.9139	24.6477	18.5122	19.9586	0.497222	0.541052	0.815509	0.806793	0.605962	0.653308
86584	LOC120095102	10	+	39148621	39148622	1	39148622	1		lncRNA		76	0.00118231	0.000452856	0.000381349	0.000377915	0.00120332	0.000452856	0.0799135	0.052679	0.0411922	0.0478146	0.0854898	0.052679	12	0.093151	9.58847	10.7083	11.7934	9.93084	8.42283	13.4084	13.4084	13.4084	13.4084	13.4084	7.12363	13.7602	13.3959	8.87161	13.7624	11.3827	0.531283	1.02624	0.999067	0.661648	1.0264	0.848928
193303	Mbnl2	15	+	97541197	97541214	17	97541199	4		protein_coding	XM_039093646.1	133	0.000192811	0.00126672	0.000399787	0.000273978	0.00153287	0.000399787	0.0270968	0.0962372	0.0424617	0.0390166	0.0997525	0.0424617	12	6.91334	7.48389	6.57115	6.63088	8.45304	7.21046	23.6945	23.6945	23.6945	23.6945	23.6945	22.3364	22.047	21.8878	22.2665	16.4565	20.9988	0.942684	0.930469	0.92375	0.939735	0.694529	0.886233
357895	Snhg11	3	+	147038227	147038236	9	147038231	3		protein_coding		326	0.0011745	0.000496988	0.000183697	0.000462961	0.0013962	0.000496988	0.0799135	0.0567729	0.0263917	0.0550646	0.0954989	0.0567729	12	6.66377	6.67029	5.08743	5.02934	4.95882	5.68193	59.9437	59.9437	59.9437	59.9437	59.9437	26.0662	25.7354	32.9607	33.7786	32.7133	30.2509	0.434845	0.429326	0.549862	0.563506	0.545734	0.504655
84621	-	10	+	23935914	23935919	5	23935914				-	493	0.000249801	0.0024049	0.000431358	0.000216266	0.000424642	0.000424642	0.0319026	0.138859	0.0448259	0.0343398	0.0471516	0.0448259	12	10.085	8.98309	9.63128	8.67682	8.63913	9.20306	90.9513	90.9513	90.9513	90.9513	90.9513	41.7222	43.9933	44.0954	44.6336	42.6797	43.4248	0.458731	0.483702	0.484825	0.490742	0.46926	0.477452
531382	Mobp	8	+	119899549	119899666	117	119899604	10		protein_coding		49690	0.0017267	0.00105974	0.000728595	0.000233242	0.000152758	0.000728595	0.101358	0.0878879	0.0593282	0.0359566	0.0246251	0.0593282	12	11.7386	10.4091	10.9098	10.8887	11.273	11.0438	9366.12	9366.12	9366.12	9366.12	9366.12	861.09	949.581	964.798	941.194	922.569	927.846	0.0919367	0.101385	0.103009	0.100489	0.0985007	0.0990641
330396	-	3	-	88593616	88593632	16	88593620				-	5700	0.000517151	0.000744438	0.000293104	0.00202899	0.000323285	0.000517151	0.0501454	0.0725188	0.0352909	0.127847	0.0405793	0.0501454	12	5.81074	5.2545	6.33458	4.22845	4.33819	5.19329	1069.96	1069.96	1069.96	1069.96	1069.96	123.048	144.429	90.9668	153.555	157.844	133.968	0.115002	0.134985	0.0850187	0.143514	0.147523	0.125208
293170	LOC294909	2	+	96434913	96434920	7	96434913	3		pseudogene		165	0.000617887	0.00221888	0.000748179	0.000101581	0.00022952	0.000617887	0.055745	0.132205	0.0604578	0.0212231	0.0328327	0.055745	12	4.56859	6.61461	6.56567	5.39613	4.59844	5.54869	32.0334	32.0334	32.0334	32.0334	32.0334	24.7188	18.8493	18.8485	24.8994	24.2169	22.3066	0.771656	0.588427	0.588403	0.777297	0.755989	0.696354
88212	Myocd	10	+	49885480	49885480	0	49885480	1		protein_coding	XM_006246583.4	210	0.0001266	0.00199676	0.000126302	0.00024353	0.00142325	0.00024353	0.0205124	0.12385	0.0205691	0.0364801	0.0960546	0.0364801	12	9.86563	8.96192	8.59301	10.2339	10.0891	9.54871	37.7533	37.7533	37.7533	37.7533	37.7533	14.3824	18.4184	19.6656	11.4162	12.4406	15.2646	0.380958	0.487861	0.520896	0.30239	0.329523	0.404326
529666	Slc25a20	8	+	109380617	109380627	10	109380617	2		protein_coding		43	0.000998747	0.000666789	0.000733669	0.00091968	0.000618622	0.000733669	0.0727459	0.0685283	0.0595885	0.0813545	0.0582955	0.0685283	12	6.8602	6.23176	6.34641	5.69792	7.03564	6.43439	7.17167	7.17167	7.17167	7.17167	7.17167	9.6911	9.98515	10.0368	9.47881	9.43283	9.72493	1.3513	1.39231	1.39951	1.3217	1.31529	1.35602
515152	Klhl18	8	-	110400669	110400707	38	110400682	1	mPAS	protein_coding		979	0.000876139	0.00032642	8.55934e-05	0.00231172	0.000345421	0.000345421	0.0685309	0.042484	0.0153976	0.138614	0.0415597	0.042484	12	2.65945	3.24746	3.80911	2.69668	3.68555	3.21965	186.69	186.69	186.69	186.69	186.69	64.4462	64.4021	61.3046	62.4653	62.2315	62.9699	0.345205	0.344968	0.328377	0.334594	0.333341	0.337297
39353	Pnma8c	1	+	77671520	77671525	5	77671522	2		protein_coding	XM_039100833.1	124	0.000906336	0.000524291	0.000264244	0.0012728	0.00102798	0.000906336	0.069523	0.0583635	0.0325256	0.0971641	0.0779127	0.069523	12	5.57161	5.01241	6.59622	4.50155	4.63613	5.26358	22.6977	22.6977	22.6977	22.6977	22.6977	22.2431	23.0189	16.4275	22.3403	22.0831	21.2226	0.97997	1.01415	0.723751	0.984253	0.972921	0.935008
447181	Zfp36l1	6	-	98931424	98931425	1	98931424	2		protein_coding		250	0.00104224	0.000441377	0.000565447	0.000839445	0.00111891	0.000839445	0.0748835	0.0520793	0.0516003	0.076483	0.0816072	0.0748835	12	0.0474927	11.3582	11.2682	11.2693	0.0183568	6.7923	48.5766	48.5766	48.5766	48.5766	48.5766	21.1364	25.8656	26.0972	25.8541	21.373	24.0653	0.435115	0.53247	0.537238	0.532233	0.439985	0.495408
288839	Arl15	2	+	45822561	45822569	8	45822561	3	mPAS	protein_coding	XM_039103511.1	495	0.00118271	0.00013743	0.00129099	0.0010725	0.000329824	0.0010725	0.0799135	0.0235912	0.0841846	0.0871085	0.0409149	0.0799135	12	6.22891	7.75007	6.36679	7.83988	6.50598	6.93833	95.685	95.685	95.685	95.685	95.685	30.356	22.7432	30.4369	22.5518	30.4568	27.3089	0.317249	0.237688	0.318095	0.235688	0.318302	0.285404
523213	Stoml1	8	+	58669852	58669869	17	58669856	1	mPAS	protein_coding		2065	0.000943217	0.00100726	0.000739669	0.0012145	0.000156254	0.000943217	0.0706582	0.0873976	0.0599226	0.0938415	0.0250615	0.0706582	12	6.4254	4.81204	5.98941	4.96316	6.00533	5.63907	379.069	379.069	379.069	379.069	379.069	64.8632	83.682	75.2409	83.7077	74.9394	76.4866	0.171112	0.220756	0.198488	0.220824	0.197693	0.201775
169810	-	14	+	70348538	70348539	1	70348538				-	84	0.000604042	0.00146337	0.00095657	0.000540897	0.000571808	0.000604042	0.0549644	0.104028	0.070964	0.0602711	0.0558735	0.0602711	12	10.4862	0.255334	10.7117	10.9467	10.119	8.50377	13.6828	13.6828	13.6828	13.6828	13.6828	12.9047	6.32953	12.6763	12.0246	13.0748	11.402	0.943134	0.462592	0.926441	0.878818	0.955566	0.83331
18304	Usp35	1	-	151626169	151626201	32	151626195	2	mPAS	protein_coding		273	0.00071014	0.00157678	0.000237821	0.000770182	0.000884472	0.000770182	0.0602992	0.109093	0.0302099	0.0741171	0.0716535	0.0716535	12	9.76485	10.5564	9.05968	9.75263	10.6621	9.95913	47.9273	47.9273	47.9273	47.9273	47.9273	26.7215	21.9209	28.2186	26.1476	20.8581	24.7733	0.557542	0.457377	0.58878	0.545567	0.435204	0.516894
214573	Cdhr2	17	-	9876841	9876867	26	9876863	3	mPAS	protein_coding		862	0.00126194	0.00104011	0.000527062	0.000428255	0.000937949	0.000937949	0.0826299	0.0878879	0.0499639	0.05251	0.0745292	0.0745292	12	6.06262	7.9684	5.73408	8.09976	5.00775	6.57452	159.824	159.824	159.824	159.824	159.824	46.9381	21.5915	46.9989	17.0756	42.742	35.0692	0.293685	0.135095	0.294066	0.10684	0.267431	0.219424
80298	H3f3b	10	-	101256446	101256490	44	101256481	4	mPAS	protein_coding		5861	0.000158305	0.000631052	0.000358518	0.00283611	0.000227984	0.000358518	0.0234405	0.0661397	0.0400897	0.158285	0.0327606	0.0400897	12	10.4365	11.9045	10.8649	10.71	10.8312	10.9494	1115.83	1115.83	1115.83	1115.83	1115.83	303.466	276.105	317.856	309.005	313.755	304.037	0.271963	0.247443	0.28486	0.276927	0.281184	0.272476
504646	St3gal4	8	-	33415663	33415680	17	33415674	1	mPAS	protein_coding		980	0.000253155	0.001221	0.00181649	0.000345376	0.000580899	0.000580899	0.0319026	0.0951249	0.103939	0.0467839	0.0560718	0.0560718	12	1.93419	2.84266	1.96991	3.67079	3.79578	2.84267	180.136	180.136	180.136	180.136	180.136	87.0772	74.6866	85.9538	61.37	56.4567	73.1089	0.483396	0.414611	0.47716	0.340687	0.313411	0.405853
462648	Slc10a1	6	+	100618108	100618126	18	100618109	1		protein_coding	NM_017047.2	126	0.000508808	0.0010567	0.0004566	0.000193729	0.00204277	0.000508808	0.0501454	0.0878879	0.04625	0.0320285	0.118164	0.0501454	12	8.14938	6.46326	7.40866	8.02905	7.68909	7.54789	22.3564	22.3564	22.3564	22.3564	22.3564	11.8852	18.1791	15.9949	12.2967	14.7956	14.6303	0.531625	0.813149	0.715452	0.550032	0.661807	0.654413
277145	-	2	-	174829410	174829415	5	174829413				-	92	0.00245176	0.000115695	0.000595574	0.000260523	0.000845196	0.000595574	0.125729	0.0214321	0.0534284	0.0376065	0.0706339	0.0534284	12	2.82653	2.39958	0.908007	2.72092	2.58622	2.28825	17.498	17.498	17.498	17.498	17.498	11.1674	12.4167	12.4981	10.9069	12.3025	11.8583	0.638212	0.709606	0.714261	0.623321	0.70308	0.677696
87081	Larp1	10	+	42243737	42243837	100	42243744	4	mPAS	protein_coding		2660	0.0005904	0.00156259	0.000651516	0.000640704	0.000842199	0.000651516	0.0544939	0.109062	0.0551946	0.0662763	0.0705692	0.0662763	12	11.6056	11.2972	0.250532	11.0056	11.0786	9.0475	492.524	492.524	492.524	492.524	492.524	118.47	123.355	96.4294	122.954	127.375	117.717	0.240536	0.250454	0.195786	0.249641	0.258617	0.239007
175354	Gpr137c	15	-	18466757	18466757	0	18466757	2		protein_coding		105	0.000698465	0.00140483	0.000568196	0.000192138	0.00144297	0.000698465	0.0599491	0.102559	0.0517026	0.0320285	0.0964	0.0599491	12	4.77619	6.49543	4.55883	4.60161	6.2133	5.32907	22.243	22.243	22.243	22.243	22.243	26.8028	20.925	26.3723	25.28	23.0919	24.4944	1.205	0.940747	1.18565	1.13654	1.03817	1.10122
449215	Nrde2	6	-	119407495	119407520	25	119407505	2		protein_coding		99	0.00138835	0.000158362	0.000221617	0.00171664	0.00085278	0.00085278	0.0871339	0.0263303	0.0288793	0.113574	0.0707426	0.0707426	12	3.05691	4.06469	3.05436	2.54005	2.37914	3.01903	19.9265	19.9265	19.9265	19.9265	19.9265	19.7238	15.9469	19.4379	19.0358	19.0475	18.6384	0.989827	0.800285	0.97548	0.9553	0.955888	0.935356
477215	-	7	-	76052556	76052559	3	76052558				-	3981	0.00120111	0.00137087	0.000724718	0.000422027	0.000637777	0.000724718	0.0803023	0.101243	0.0593167	0.052149	0.0593956	0.0593956	12	10.2452	9.77859	10.2838	10.4582	10.1996	10.1931	717.656	717.656	717.656	717.656	717.656	272.899	296.124	272.264	254.952	283.667	275.981	0.380264	0.412627	0.379379	0.355257	0.395269	0.384559
83646	Spsb3	10	+	13912830	13912847	17	13912832	3	mPAS	protein_coding	XM_017597229.2	7769	0.000311959	0.000248717	9.33033e-05	0.00229282	0.00143056	0.000311959	0.0369913	0.0341926	0.0160507	0.13842	0.0960546	0.0369913	12	4.7512	5.13276	6.00664	6.38234	4.44902	5.34439	1467.52	1467.52	1467.52	1467.52	1467.52	185.135	179.749	148.785	125.693	181.034	164.079	0.126155	0.122484	0.101385	0.0856498	0.12336	0.111807
439369	Mta3	6	-	10897777	10897780	3	10897779	5		protein_coding		175	0.000663987	0.00220398	0.000453468	0.000529318	0.000535289	0.000535289	0.0582771	0.131563	0.0461563	0.0596083	0.0537948	0.0582771	12	1.40558	0.0255266	0.0951373	11.4061	1.03042	2.79255	30.9549	30.9549	30.9549	30.9549	30.9549	14.2829	18.9554	18.9221	17.6891	16.6068	17.2912	0.461411	0.612355	0.611279	0.571447	0.536484	0.558595
422149	-	5	+	23704030	23704033	3	23704030				-	680	0.000944288	0.00176784	0.000543058	0.000800414	0.000381626	0.000800414	0.0706582	0.116668	0.050613	0.0754265	0.0439106	0.0706582	12	10.5453	9.68332	10.2186	9.9665	10.2101	10.1248	124.277	124.277	124.277	124.277	124.277	42.2007	56.1744	48.4062	53.7466	48.88	49.8816	0.339569	0.45201	0.389502	0.432475	0.393315	0.401374
545747	Rrp36	9	+	14311332	14311343	11	14311342	4		protein_coding		137	0.000356556	0.00074121	0.00025644	0.00275077	0.000335791	0.000356556	0.0407307	0.0724264	0.0319363	0.154516	0.0413323	0.0413323	12	5.50791	6.15207	5.5578	6.33876	6.21067	5.95344	26.1973	26.1973	26.1973	26.1973	26.1973	17.8278	13.3574	17.6334	11.786	12.8254	14.686	0.680519	0.509877	0.6731	0.449893	0.489569	0.560592
4123	Rgs17	1	-	42228529	42228551	22	42228535	8		protein_coding		933	0.0009524	0.000219579	0.000940523	0.00159782	0.000731073	0.000940523	0.0706582	0.0321345	0.0702781	0.110059	0.0639578	0.0702781	12	0.42805	0.533938	0.440247	10.8797	0.459733	2.54834	190.359	190.359	190.359	190.359	190.359	96.1498	93.762	95.8936	92.2868	95.9863	94.8157	0.505097	0.492553	0.50375	0.484803	0.504237	0.498088
87268	RGD1304587	10	+	43997281	43997289	8	43997287	3	mPAS	protein_coding	XM_006246486.4	213	0.000153465	0.00199217	0.00047568	0.00164349	0.000234851	0.00047568	0.0233185	0.12385	0.0468607	0.110577	0.0332483	0.0468607	12	10.9734	10.8178	10.3763	10.8185	11.0631	10.8098	39.9014	39.9014	39.9014	39.9014	39.9014	20.9585	21.7041	23.4017	21.6024	20.7253	21.6784	0.525257	0.543945	0.586489	0.541394	0.519414	0.5433
22869	Oat	1	-	187347856	187347874	18	187347865	2	mPAS	protein_coding	NM_022521.3	1100	0.000714778	0.000779776	0.0010239	0.000367125	0.00168619	0.000779776	0.0605312	0.0739942	0.0745777	0.0473935	0.10418	0.0739942	12	5.27333	6.25405	4.70263	4.37252	6.31623	5.38375	215.748	215.748	215.748	215.748	215.748	75.674	50.9409	84.735	83.3894	48.6974	68.6873	0.350752	0.236113	0.39275	0.386514	0.225714	0.318369
179530	-	15	-	53179457	53179476	19	53179475				-	280	0.000871504	0.000759779	0.00210534	0.000497396	0.000339188	0.000759779	0.0685309	0.0733231	0.115229	0.0578601	0.0415597	0.0685309	12	8.67443	9.66625	10.3953	10.4486	10.5098	9.93889	49.912	49.912	49.912	49.912	49.912	26.7203	25.1227	19.358	19.1503	18.5976	21.7898	0.535348	0.50334	0.387843	0.383682	0.372608	0.436564
398345	Pex26	4	+	154426951	154426956	5	154426953	3	mPAS	protein_coding	XM_006237235.4	774	0.000505656	0.000935034	0.00103375	0.00129284	0.000837939	0.000935034	0.0501454	0.0829437	0.0748223	0.0975223	0.0704233	0.0748223	12	10.826	8.87511	10.5421	9.02947	9.01673	9.65788	142.015	142.015	142.015	142.015	142.015	45.1546	49.1663	48.1352	51.3752	51.9308	49.1524	0.317956	0.346204	0.338944	0.361758	0.36567	0.346106
529393	Mon1a	8	+	108593156	108593166	10	108593163	2	mPAS	protein_coding	XM_039081597.1	3200	0.000892762	0.000920879	0.000840433	0.00160828	0.000342961	0.000892762	0.0688142	0.0823785	0.0662162	0.110059	0.0415597	0.0688142	12	5.98912	4.73752	3.17541	2.877	3.89943	4.1357	603.813	603.813	603.813	603.813	603.813	33.5226	99.7531	123.253	121.221	123.403	100.231	0.0555182	0.165205	0.204125	0.200759	0.204373	0.165996
219702	Klf6	17	-	64542039	64542090	51	64542086	2		protein_coding		1041	0.000156149	0.00124443	0.000228947	0.00288754	0.000102544	0.000228947	0.0234405	0.0952443	0.0295555	0.159478	0.0187154	0.0295555	12	0.246439	10.9925	0.269058	10.823	0.402464	4.54669	193.899	193.899	193.899	193.899	193.899	43.7439	55.6723	43.5702	55.9035	41.1874	48.0155	0.225602	0.287121	0.224706	0.288313	0.212417	0.247632
139920	Cadm3	13	-	85786434	85786509	75	85786463	3	mPAS	protein_coding		12842	9.78855e-05	0.000167318	0.000231111	0.00385313	0.000306497	0.000231111	0.0170799	0.0273893	0.0296949	0.190301	0.0395378	0.0296949	12	6.44034	6.30112	5.33906	5.27078	5.7916	5.82858	2401.09	2401.09	2401.09	2401.09	2401.09	450.624	485.057	661.478	664.966	597.51	571.927	0.187674	0.202015	0.27549	0.276943	0.248849	0.238194
532664	LOC100360856	9	-	2907667	2907674	7	2907673	1	mPAS	protein_coding		245	0.000362428	0.00098479	0.000507601	0.0010439	0.00180939	0.00098479	0.0412531	0.0861542	0.0485539	0.0865562	0.109083	0.0861542	12	6.3714	7.0146	8.1723	5.03868	5.81445	6.48229	45.249	45.249	45.249	45.249	45.249	20.6479	18.3845	9.07056	18.0249	20.8907	17.4037	0.456317	0.406296	0.200459	0.398349	0.461685	0.384621
266254	-	2	-	37605143	37605143	0	37605143				-	93	0.000341565	0.000377541	0.000475635	0.00275391	0.000810329	0.000475635	0.039444	0.047203	0.0468607	0.154516	0.0695503	0.047203	12	6.48961	5.25527	6.54518	6.55396	5.65334	6.09947	17.1889	17.1889	17.1889	17.1889	17.1889	14.5961	20.0042	14.3376	14.4966	19.3975	16.5664	0.849161	1.16379	0.834121	0.843373	1.12849	0.963787
520688	-	8	+	41717589	41717600	11	41717593				-	6246	0.000170881	0.00284321	0.000188454	0.0011159	0.000622757	0.000622757	0.0245882	0.15263	0.0267176	0.0890397	0.0585115	0.0585115	12	6.16814	6.3762	4.21937	6.30672	6.26706	5.8675	1190.65	1190.65	1190.65	1190.65	1190.65	319.772	280.779	481.806	295.442	299.941	335.548	0.26857	0.23582	0.404659	0.248136	0.251914	0.28182
226561	-	17	+	41348586	41348596	10	41348586				-	173	6.16016e-05	0.000761952	0.000192199	0.00362792	0.000299796	0.000299796	0.0117848	0.0733231	0.0268393	0.184042	0.0391795	0.0391795	12	5.91349	5.91974	3.96442	3.95592	5.37132	5.02498	32.5918	32.5918	32.5918	32.5918	32.5918	17.4249	17.3144	28.8686	28.0777	23.3335	23.0038	0.53464	0.531251	0.885761	0.861496	0.715931	0.705816
2937	Kiaa0408L	1	-	28615598	28615605	7	28615603	4	mPAS	protein_coding	XM_039103346.1	394	0.000574426	0.000299959	0.000638103	0.00295244	0.000494815	0.000574426	0.0534958	0.0395261	0.0550659	0.161109	0.0519487	0.0534958	12	3.40661	6.1244	3.80336	5.87091	5.00062	4.84118	67.2578	67.2578	67.2578	67.2578	67.2578	59.7969	32.4176	63.6305	39.3456	57.7229	50.5827	0.88907	0.48199	0.946069	0.584997	0.858234	0.752072
340049	Zmynd19	3	+	7767487	7767518	31	7767515	3		protein_coding	XM_039105184.1	421	0.00088439	0.00143419	0.000433339	0.00161626	0.000594768	0.00088439	0.0688142	0.103045	0.0448259	0.110122	0.0569093	0.0688142	12	5.84457	4.28311	4.38119	3.45742	5.28674	4.65061	72.9678	72.9678	72.9678	72.9678	72.9678	26.4677	42.6076	42.7242	40.5914	34.6427	37.4067	0.362731	0.583923	0.585522	0.556291	0.474767	0.512647
241819	-	18	+	20300897	20300898	1	20300897				-	209	0.00105032	0.00217643	0.000537467	0.000887682	0.000320288	0.000887682	0.0751065	0.130353	0.050498	0.0792298	0.0403627	0.0751065	12	8.83482	9.8766	10.808	8.96187	10.3812	9.77249	36.7922	36.7922	36.7922	36.7922	36.7922	22.8309	23.6122	19.6488	22.7723	22.3136	22.2356	0.620537	0.641773	0.53405	0.618945	0.606477	0.604356
55991	Rbm4b	1	+	202049258	202049274	16	202049258	5		protein_coding		135	0.000764381	0.00146426	0.00149036	0.000986742	0.00029615	0.000986742	0.0633797	0.104028	0.0920803	0.0838892	0.0390243	0.0838892	12	10.2372	10.4967	9.32995	10.4358	10.3519	10.1703	23.6329	23.6329	23.6329	23.6329	23.6329	13.6416	12.4149	16.6913	12.4971	13.11	13.671	0.577227	0.525324	0.706273	0.5288	0.554735	0.578472
251172	Phkb	19	-	21025724	21025733	9	21025729	5		protein_coding		328	0.00130105	0.00022554	0.00115243	0.000968377	0.00137414	0.00115243	0.083808	0.0325566	0.0782797	0.0832741	0.095073	0.0832741	12	4.34423	5.87055	4.32937	6.42679	4.70807	5.1358	55.5612	55.5612	55.5612	55.5612	55.5612	31.7667	26.3709	31.7642	20.1154	32.0113	28.4057	0.571743	0.474628	0.571697	0.36204	0.576144	0.51125
86636	G3bp1	10	+	39616021	39616032	11	39616029	4		protein_coding	XM_039085121.1	125	0.000773767	0.00105801	0.00148318	0.00058444	0.00114462	0.00105801	0.0636594	0.0878879	0.0918153	0.0624918	0.0822779	0.0822779	12	10.6201	9.8706	8.75739	10.3353	10.3525	9.98718	21.5631	21.5631	21.5631	21.5631	21.5631	15.3273	18.5229	17.1783	17.2642	16.5971	16.9779	0.710809	0.859007	0.79665	0.800634	0.769698	0.787359
503205	Elavl3	8	-	20547266	20547290	24	20547278	9		protein_coding		414	0.00062617	0.000959056	0.000330388	0.0016802	0.00145403	0.000959056	0.0559893	0.0842876	0.038015	0.112333	0.0964	0.0842876	12	3.22667	2.80185	2.33764	2.20956	2.90284	2.69571	79.0775	79.0775	79.0775	79.0775	79.0775	39.3633	39.4257	43.1453	41.3576	41.07	40.8724	0.497781	0.49857	0.545608	0.523001	0.519365	0.516865
154543	Sult1d1	14	-	20467304	20467305	1	20467305	2		protein_coding	XM_039092368.1	290	0.000420128	0.000375008	0.0012643	0.00246212	0.000563381	0.000563381	0.0445524	0.0470998	0.082955	0.143731	0.05522	0.05522	12	10.6208	11.5231	0.120279	10.2585	8.94192	8.29293	50.7366	50.7366	50.7366	50.7366	50.7366	42.856	31.4512	19.1705	45.6054	43.3092	36.4785	0.844675	0.619892	0.377844	0.898867	0.853609	0.718977
257794	LOC288913	19	+	23917803	23917850	47	23917807	3		protein_coding		2350	0.000855308	0.00122836	0.000974504	0.00132265	0.000725158	0.000974504	0.0680752	0.0951249	0.0719033	0.0986248	0.0636156	0.0719033	12	5.81837	5.88073	5.94359	3.07361	5.09376	5.16201	447.671	447.671	447.671	447.671	447.671	79.1441	76.1517	72.8659	110.847	109.822	89.7662	0.176791	0.170107	0.162767	0.247608	0.245319	0.200518
287107	Ndufs6	2	+	27202234	27202252	18	27202246	2		protein_coding		5230	0.00042998	0.00209927	0.000669243	0.00096934	0.000938743	0.000938743	0.0447701	0.127813	0.0560769	0.0832741	0.0745292	0.0745292	12	4.85333	3.03432	3.97517	4.12959	5.97294	4.39307	973.111	973.111	973.111	973.111	973.111	430.144	424.489	497.006	462.421	247.031	412.218	0.44203	0.436219	0.510739	0.475198	0.253857	0.423609
556255	Dlgap1	9	+	110721164	110721169	5	110721166	16		protein_coding		74	0.0013644	0.00035201	0.00114813	0.00105446	0.00126866	0.00114813	0.0859706	0.0450757	0.0782797	0.0865836	0.0889377	0.0859706	12	5.73918	4.95152	6.82602	4.92915	5.92576	5.67433	11.2445	11.2445	11.2445	11.2445	11.2445	12.5649	11.0646	10.9314	11.2347	12.5817	11.6755	1.11743	0.984002	0.972157	0.999125	1.11892	1.03833
532282	Ptprs	9	-	1245401	1245441	40	1245410	2	mPAS	protein_coding		38484	4.51538e-05	0.00384848	0.000416289	6.81751e-05	0.000822238	0.000416289	0.00937221	0.182685	0.0436307	0.0162785	0.0700048	0.0436307	12	4.32011	4.54043	3.31059	2.95155	2.7051	3.56556	7325.92	7325.92	7325.92	7325.92	7325.92	1041.33	926.138	1267.32	1258.48	1209.45	1140.54	0.142143	0.126419	0.172991	0.171785	0.165091	0.155686
216118	Pak1ip1	17	-	23742251	23742259	8	23742252	1	mPAS	protein_coding		119	0.00062941	0.000425871	0.000543309	0.00293942	0.000683806	0.00062941	0.0559893	0.0511895	0.050613	0.161094	0.0618248	0.0559893	12	11.5817	11.2696	1.58935	11.7944	1.22135	7.49127	21.753	21.753	21.753	21.753	21.753	17.4147	16.8715	11.392	17.6039	13.3837	15.3332	0.800566	0.775593	0.523695	0.809263	0.615258	0.704875
334882	-	3	-	126332321	126332321	0	126332321				-	258	0.000772047	0.00279141	0.000506218	0.000473022	0.000749257	0.000749257	0.0636594	0.151027	0.0485539	0.0558429	0.0651895	0.0636594	12	4.86735	6.13411	6.04327	6.89534	6.82956	6.15393	51.7031	51.7031	51.7031	51.7031	51.7031	31.0544	33.2724	33.5274	28.4129	27.9951	30.8524	0.60063	0.643528	0.648459	0.549539	0.541459	0.596723
374242	Slc25a26	4	-	127111400	127111401	1	127111401	4		protein_coding	XM_039107816.1	267	0.00075427	0.0024098	0.00138873	0.000518349	0.000244865	0.00075427	0.0630351	0.138889	0.087678	0.0587901	0.0337366	0.0630351	12	11.5407	9.09965	10.7246	10.4178	10.7041	10.4974	44.0475	44.0475	44.0475	44.0475	44.0475	18.4596	33.2441	28.5591	31.0982	29.7578	28.2238	0.419084	0.754733	0.64837	0.706014	0.675583	0.640757
44832	Tars3	1	+	119265179	119265193	14	119265183	2		protein_coding	XM_039112659.1	383	0.000323708	0.0011561	0.0017988	0.000566943	0.00154076	0.0011561	0.0377941	0.0929478	0.103487	0.0620842	0.099856	0.0929478	12	0.573701	0.687048	0.3479	1.84435	2.34011	1.15862	72.9798	72.9798	72.9798	72.9798	72.9798	34.9051	35.1367	34.22	29.3988	23.4223	31.4166	0.478284	0.481458	0.468896	0.402834	0.320942	0.430483
275870	-	2	-	165560079	165560081	2	165560080				-	435	0.00255708	0.00049393	0.00132816	0.000833513	0.000247231	0.000833513	0.129514	0.0567729	0.0855543	0.076483	0.0338419	0.076483	12	9.52155	10.2747	9.24833	9.76682	8.96201	9.55469	85.2233	85.2233	85.2233	85.2233	85.2233	63.0876	61.9118	58.8794	64.7543	58.534	61.4334	0.740262	0.726465	0.690884	0.75982	0.68683	0.720852
557824	Otud5	X	-	14626170	14626199	29	14626173	4	mPAS	protein_coding		2266	0.000524239	0.00213398	0.000312977	0.000339983	0.0022068	0.000524239	0.0501454	0.128847	0.0366761	0.0463383	0.123383	0.0501454	12	3.92871	4.24211	3.28938	3.01013	3.54287	3.60264	440.244	440.244	440.244	440.244	440.244	204.731	188.532	223.49	217.066	214.139	209.592	0.465039	0.428244	0.507651	0.493059	0.48641	0.476081
55744	Acy3	1	+	201283174	201283177	3	201283176	1		protein_coding	NM_001009603.1	206	0.00159005	0.000674689	0.000651823	0.00122386	0.00140163	0.00122386	0.0958165	0.0686734	0.0551946	0.0943351	0.0955183	0.0943351	12	3.80535	2.74495	4.74138	3.29405	4.14645	3.74643	36.6817	36.6817	36.6817	36.6817	36.6817	23.6955	22.7438	19.3522	24.5734	22.9376	22.6605	0.645976	0.620033	0.527572	0.669908	0.625316	0.617761
277880	Arnt	2	-	183032768	183032771	3	183032771	3		protein_coding	NM_001389231.1	235	0.000892718	0.000332345	0.00174782	0.00207214	0.000497289	0.000892718	0.0688142	0.0429035	0.101845	0.130307	0.0519487	0.0688142	12	9.92291	10.4904	10.5139	10.5341	9.73839	10.2399	40.9114	40.9114	40.9114	40.9114	40.9114	31.6337	30.4453	29.1944	28.9241	32.7253	30.5846	0.773224	0.744177	0.713601	0.706993	0.799906	0.74758
550029	Ndufb3	9	+	60139392	60139476	84	60139420	2	mPAS	protein_coding		9861	0.00127972	0.00136025	0.000385323	0.00160527	0.00091366	0.00127972	0.0831084	0.101243	0.0413402	0.110059	0.0732704	0.0831084	12	4.91296	6.13065	4.0591	4.05259	4.40398	4.71185	1806.23	1806.23	1806.23	1806.23	1806.23	791.681	420.912	904.887	882.166	875.094	774.948	0.438305	0.233033	0.50098	0.488401	0.484486	0.429041
305947	Lamtor3	2	+	226423598	226423612	14	226423607	3	mPAS	protein_coding		528	0.000862795	0.00301162	0.000546455	0.000762674	0.000391209	0.000762674	0.0681587	0.157562	0.050742	0.0738781	0.0445291	0.0681587	12	2.77421	1.11813	2.66572	1.91296	1.90749	2.0757	98.1463	98.1463	98.1463	98.1463	98.1463	29.4992	26.433	29.6706	30.8274	31.3547	29.557	0.300563	0.269322	0.30231	0.314097	0.319469	0.301152
177490	-	15	-	35703487	35703490	3	35703490				-	143	0.00118593	0.000782884	0.000165176	0.00161079	0.00184322	0.00118593	0.0799611	0.0739942	0.0243976	0.110059	0.110029	0.0799611	12	2.69713	2.20572	1.96684	3.31852	2.70056	2.57775	27.6891	27.6891	27.6891	27.6891	27.6891	17.8712	18.9279	19.2241	14.3005	18.0812	17.681	0.645426	0.683586	0.694285	0.516468	0.653008	0.638555
510502	LOC100909416	8	-	73476984	73476984	0	73476984	1		lncRNA	NR_131119.1	51	0.0010203	0.00142894	0.00123002	0.00097935	0.000966677	0.0010203	0.0736402	0.102901	0.0813789	0.0838308	0.0752079	0.0813789	12	10.2191	9.85869	8.99365	9.92103	9.01945	9.60239	8.30109	8.30109	8.30109	8.30109	8.30109	11.3572	11.2195	10.414	11.2162	10.613	10.964	1.36816	1.35157	1.25453	1.35118	1.2785	1.32079
572258	Igbp1	X	+	65604947	65604950	3	65604947	3		protein_coding		114	0.000572081	0.00205332	0.00191323	0.00028942	0.000804561	0.000804561	0.0534341	0.126616	0.108497	0.0405922	0.0692424	0.0692424	12	1.938	0.70736	2.56057	0.763093	2.04998	1.6038	21.2432	21.2432	21.2432	21.2432	21.2432	15.9314	15.4756	13.1833	15.6733	15.3598	15.1247	0.749953	0.728497	0.620592	0.737805	0.723048	0.711979
460879	-	6	+	87878424	87878424	0	87878424				-	102	0.000142094	0.0010464	0.00147017	0.000575408	0.00243862	0.0010464	0.022229	0.0878879	0.0913662	0.0621951	0.131755	0.0878879	12	10.807	11.7228	10.698	0.240254	11.9401	9.08164	18.4771	18.4771	18.4771	18.4771	18.4771	15.6626	12.6658	16.4232	9.50814	11.4366	13.1393	0.847678	0.685488	0.888842	0.514591	0.618958	0.711111
532027	Lars2	8	+	123106388	123106410	22	123106395	2		protein_coding		211	0.00092198	0.000416513	0.001397	0.00169211	0.00126846	0.00126846	0.0701343	0.0503827	0.0880251	0.112574	0.0889377	0.0880251	12	4.60341	6.4272	5.74833	4.53218	5.73603	5.40943	36.538	36.538	36.538	36.538	36.538	34.503	24.4459	31.4841	33.6935	31.581	31.1415	0.944304	0.669053	0.861679	0.922147	0.864332	0.852303
108088	Ece2	11	-	80263154	80263190	36	80263162	4		protein_coding		3889	0.000462422	0.000299654	0.000252363	0.00453778	0.000220177	0.000299654	0.0470678	0.0395261	0.031677	0.209762	0.0320741	0.0395261	12	6.84884	8.08794	7.33414	7.16549	8.06832	7.50095	725.874	725.874	725.874	725.874	725.874	121.077	76.9694	108.154	114.607	71.9552	98.5526	0.166801	0.106037	0.148999	0.157889	0.0991291	0.135771
151890	Pacc1	13	+	102929758	102929774	16	102929761	2	mPAS	protein_coding	XM_008769855.2	314	0.00125236	0.000659755	0.000884377	0.00105786	0.00200177	0.00105786	0.0823419	0.0681594	0.0681679	0.0865836	0.117072	0.0823419	12	5.43736	6.72176	5.2464	5.29561	6.67288	5.8748	58.295	58.295	58.295	58.295	58.295	32.2151	25.0972	32.469	32.1118	25.0986	29.3983	0.552622	0.430521	0.556978	0.550849	0.430544	0.504303
236837	Ndst1	18	-	54136878	54136910	32	54136887	2	mPAS	protein_coding		1967	0.00025123	0.00128016	0.000832608	0.000290154	0.0032034	0.000832608	0.0319026	0.0966601	0.0657739	0.0405922	0.157477	0.0657739	12	0.615999	2.5539	0.625612	1.48987	1.33249	1.32357	362.39	362.39	362.39	362.39	362.39	107.238	76.4063	107.094	109.935	109.157	101.966	0.295919	0.21084	0.295523	0.30336	0.301214	0.281371
398425	-	4	+	155641891	155641904	13	155641900				-	1361	0.000831488	0.00153871	0.00153066	0.000487385	0.00152843	0.00152843	0.0668495	0.107632	0.0934668	0.056962	0.0996678	0.0934668	12	9.59259	9.91661	10.4605	10.0388	9.87189	9.97609	237.8	237.8	237.8	237.8	237.8	136.308	136.429	130.541	136.635	138.241	135.631	0.573205	0.573713	0.548954	0.574581	0.581335	0.570358
453258	Morn2	6	+	14720394	14720395	1	14720395	2		protein_coding	NM_001126086.2	175	0.00087452	0.0021796	0.000152473	0.00251722	0.000243091	0.00087452	0.0685309	0.130353	0.0231678	0.145896	0.0337366	0.0685309	12	10.2136	8.88305	8.88325	0.0800174	9.89398	7.59079	30.8939	30.8939	30.8939	30.8939	30.8939	22.67	20.4122	22.275	7.70593	24.0445	19.4215	0.733801	0.660719	0.721016	0.249432	0.778292	0.628652
103660	Zbtb20	11	-	57075700	57075731	31	57075727	5		protein_coding	XM_039088143.1	296	0.0007936	0.000530009	0.0019356	0.0022643	0.000550542	0.0007936	0.0642917	0.0586463	0.108987	0.137228	0.0546246	0.0642917	12	1.81083	0.442582	0.937367	1.37604	0.329953	0.979354	59.3218	59.3218	59.3218	59.3218	59.3218	31.2326	36.721	37.1591	36.4048	36.552	35.6139	0.526495	0.619014	0.626399	0.613684	0.616166	0.600351
159506	Fam193a	14	-	76256147	76256184	37	76256155	1		protein_coding		1490	0.000727697	0.0011144	0.0017216	0.00110267	0.0014116	0.0011144	0.0611362	0.0910123	0.100867	0.0884279	0.0959919	0.0910123	12	3.93794	3.30934	4.35664	4.37987	4.75826	4.14841	277.687	277.687	277.687	277.687	277.687	78.5778	75.7313	76.8061	75.893	70.5315	75.5079	0.282973	0.272722	0.276593	0.273304	0.253997	0.271918
40922	Zfp14	1	+	85277494	85277494	0	85277494	6		protein_coding	XM_039087315.1	103	0.000447368	0.00227856	0.000482158	0.00132299	0.00158194	0.00132299	0.0461268	0.13395	0.0468607	0.0986248	0.100584	0.0986248	12	8.68688	9.89754	10.2185	10.2264	10.1763	9.84112	17.8794	17.8794	17.8794	17.8794	17.8794	20.137	19.8283	19.6232	18.4707	19.3839	19.4886	1.12627	1.109	1.09753	1.03307	1.08414	1.09
219987	-	17	-	68720129	68720130	1	68720129				-	53	0.000937617	0.00120648	0.000958641	0.00120502	0.00181856	0.00120502	0.0706582	0.0951249	0.070964	0.0933358	0.109083	0.0933358	12	8.23827	10.7829	10.5297	10.5994	10.116	10.0532	8.43577	8.43577	8.43577	8.43577	8.43577	7.87487	9.59676	10.4701	9.82994	11.2545	9.80523	0.933509	1.13763	1.24115	1.16527	1.33414	1.16234
29094	-	1	-	239104327	239104331	4	239104331				-	100	0.00098747	0.00191786	0.00150307	0.00109073	0.000665415	0.00109073	0.0720899	0.121811	0.0926164	0.0881378	0.0608979	0.0881378	12	9.95727	9.5737	9.46252	9.50812	8.84215	9.46875	17.8712	17.8712	17.8712	17.8712	17.8712	15.6337	15.642	15.4349	16.0942	14.2627	15.4135	0.874798	0.875264	0.863672	0.900565	0.798082	0.862476
196926	Borcs8	16	-	19274336	19274345	9	19274342	2	mPAS	protein_coding		499	0.000312173	0.00336119	0.000362825	0.00151439	0.000636192	0.000636192	0.0369913	0.167808	0.0402876	0.107457	0.0593956	0.0593956	12	6.33147	5.23547	6.12134	5.45042	5.57658	5.74306	97.8448	97.8448	97.8448	97.8448	97.8448	25.4629	40.4621	29.0611	38.7757	37.1112	34.1746	0.260238	0.413534	0.297012	0.396298	0.379287	0.349274
426649	Ptbp3	5	+	74393797	74393798	1	74393797	3	mPAS	protein_coding	XM_006238206.4	203	0.00203817	0.000161315	0.000897252	0.00157785	0.00154389	0.00154389	0.113955	0.0265434	0.068641	0.110059	0.099856	0.099856	12	6.90153	6.90218	6.70747	6.20601	6.89338	6.72212	38.4031	38.4031	38.4031	38.4031	38.4031	21.9708	21.9308	23.3403	25.594	21.9019	22.9476	0.572108	0.571069	0.607772	0.666456	0.570315	0.597544
167944	Ccdc149	14	+	58605013	58605031	18	58605017	3	mPAS	protein_coding		3623	0.000538295	0.00177464	0.00121905	0.00184007	0.000865116	0.00121905	0.0510287	0.116668	0.0812138	0.118529	0.0708635	0.0812138	12	6.43043	5.64995	4.53694	5.8759	6.03768	5.70618	688.826	688.826	688.826	688.826	688.826	99.6605	136.217	151.671	127.494	120.557	127.12	0.144682	0.197752	0.220188	0.185089	0.175018	0.184546
213581	LOC102551150	17	-	3127523	3127536	13	3127533	2		pseudogene		84	0.000920634	0.000545368	0.00244143	0.000691581	0.00167332	0.000920634	0.0701343	0.0597215	0.125602	0.0692824	0.10395	0.0701343	12	6.66687	6.01122	6.95598	5.25919	5.18951	6.01655	13.519	13.519	13.519	13.519	13.519	13.6734	14.4577	12.6709	13.2465	13.2347	13.4567	1.01142	1.06944	0.937266	0.979839	0.978965	0.995385
107083	Dlg1	11	-	68912482	68912511	29	68912489	5		protein_coding		217	0.000422053	0.00534332	0.00013866	0.000122789	0.000387468	0.000387468	0.0445524	0.221766	0.0219075	0.0237768	0.0444217	0.0444217	12	10.8615	11.9674	0.379811	10.3021	0.378975	6.77796	38.6812	38.6812	38.6812	38.6812	38.6812	19.9352	15.2726	12.0776	20.9532	12.1072	16.0692	0.515373	0.394833	0.312234	0.541689	0.312999	0.415425
159428	Grk4	14	-	76055111	76055112	1	76055112	4		protein_coding		2574	0.00121842	0.00210101	0.00135903	0.000831139	0.000916176	0.00121842	0.0806114	0.127813	0.086633	0.076483	0.0732871	0.0806114	12	9.72619	10.4576	9.99894	10.5037	10.2673	10.1907	474.289	474.289	474.289	474.289	474.289	240.648	214.258	237.194	211.45	227.391	226.188	0.507386	0.451745	0.500105	0.445825	0.479435	0.476899
220052	LOC120097922	17	-	70928428	70928435	7	70928428	1		lncRNA		76	0.000273829	0.00198221	0.000535773	0.0018829	0.00178114	0.00178114	0.0337255	0.123672	0.0504882	0.120555	0.108359	0.108359	12	8.38243	9.73141	8.61028	9.56701	9.70857	9.19994	13.5041	13.5041	13.5041	13.5041	13.5041	13.6622	11.3295	13.6556	11.8314	11.1484	12.3254	1.0117	0.838969	1.01121	0.876132	0.825552	0.912714
164506	Paqr3	14	+	12479994	12480003	9	12479998	2		protein_coding		322	0.000941938	0.000759218	0.00134524	0.00274292	0.000680354	0.000941938	0.0706582	0.0733231	0.0862774	0.154445	0.0617315	0.0733231	12	5.63704	4.49425	5.73739	4.55046	6.08706	5.30124	58.5175	58.5175	58.5175	58.5175	58.5175	28.9739	38.06	27.7323	36.7055	22.3562	30.7656	0.495132	0.650404	0.473915	0.627256	0.382043	0.52575
343732	Arl6ip6	3	+	37717046	37717060	14	37717047	2		protein_coding		53	0.00178269	0.000724389	0.000918081	0.00180375	0.00128652	0.00128652	0.103497	0.0717543	0.0695835	0.117863	0.0894001	0.0894001	12	4.89354	4.8652	6.81697	6.83999	4.96302	5.67574	9.38137	9.38137	9.38137	9.38137	9.38137	10.4965	10.2307	9.18843	9.15804	10.4208	9.8989	1.11887	1.09054	0.979433	0.976194	1.1108	1.05517
174526	Top2b	15	-	9076652	9076687	35	9076653	2		protein_coding		46	0.000880048	0.00136914	0.000477127	0.00270747	0.00111406	0.00111406	0.0686676	0.101243	0.0468607	0.153538	0.0815188	0.0815188	12	5.81866	6.7295	4.73872	5.85049	4.98659	5.62479	9.22528	9.22528	9.22528	9.22528	9.22528	12.8176	10.2963	12.0068	12.7621	12.5343	12.0834	1.3894	1.11609	1.30151	1.38338	1.35869	1.30981
17651	-	1	-	140417396	140417397	1	140417397				-	177	0.00235115	0.000769308	0.00103432	0.00135162	0.00104658	0.00104658	0.12321	0.0735871	0.0748223	0.0995195	0.0788924	0.0788924	12	10.2043	11.1871	9.03842	11.8903	10.8141	10.6268	29.5889	29.5889	29.5889	29.5889	29.5889	23.6632	17.0373	23.5321	9.89034	20.7287	18.9703	0.799731	0.575799	0.7953	0.334258	0.700555	0.641129
34892	Nkd2	1	+	29469266	29469277	11	29469267	3		protein_coding		146	0.00237638	0.00127668	0.000661152	0.00158381	0.000660072	0.00127668	0.123496	0.0966601	0.0556929	0.110059	0.0608979	0.0966601	12	8.76856	8.17916	10.0681	9.64551	10.2286	9.37798	26.2908	26.2908	26.2908	26.2908	26.2908	13.9671	13.561	9.08787	11.5886	8.44583	11.3301	0.531255	0.51581	0.345668	0.440788	0.321247	0.430954
9064	Pld3	1	-	82821308	82821328	20	82821328	6		protein_coding		376	0.000976548	0.000602456	0.000850253	0.00355081	0.000580448	0.000850253	0.0716218	0.0635621	0.0666704	0.1819	0.0560718	0.0666704	12	6.25717	5.95704	4.69813	5.30395	6.06515	5.65629	68.341	68.341	68.341	68.341	68.341	22.7139	28.5407	44.522	38.805	26.5069	32.2177	0.332361	0.417622	0.651467	0.567814	0.387863	0.471425
207041	Cep44	16	+	33721627	33721630	3	33721627	1		protein_coding		112	0.00110392	0.000715105	0.00042936	0.00223487	0.00208223	0.00110392	0.0775602	0.0712904	0.0448259	0.135963	0.119818	0.0775602	12	7.57844	8.40862	8.09196	9.91095	9.03065	8.60412	20.8725	20.8725	20.8725	20.8725	20.8725	12.5776	14.5377	14.0634	9.72459	13.0668	12.794	0.602594	0.696501	0.673778	0.465905	0.626029	0.612961
111659	Cbr1	11	+	32862979	32862983	4	32862981	1	mPAS	protein_coding	NM_019170.2	205	0.000684166	0.00172025	0.00154798	0.000513888	0.00212155	0.00154798	0.0588809	0.116482	0.0938155	0.0587295	0.120432	0.0938155	12	6.77777	5.75437	4.80274	5.2234	4.79017	5.46969	37.0704	37.0704	37.0704	37.0704	37.0704	18.4894	22.571	20.6884	21.4942	20.8092	20.8105	0.498765	0.608869	0.558085	0.57982	0.561343	0.561376
89126	Dlg4	10	+	54769091	54769117	26	54769097	5	mPAS	protein_coding		521	0.00115541	0.000517003	0.00246802	0.00013345	0.00245059	0.00115541	0.0792213	0.0580158	0.126008	0.025226	0.131815	0.0792213	12	2.49515	4.15514	4.24491	2.59206	4.24536	3.54652	100.369	100.369	100.369	100.369	100.369	36.0078	25.0967	23.1893	37.8083	23.1167	29.0438	0.358756	0.250045	0.231042	0.376695	0.230319	0.289371
210568	-	16	+	63906246	63906246	0	63906246				-	38	0.00128651	0.000716114	0.0004573	0.0026429	0.00167428	0.00128651	0.0831119	0.0712904	0.04625	0.150683	0.10395	0.0831119	12	8.79592	9.88719	7.40896	0.101178	10.6205	7.36276	7.97403	7.97403	7.97403	7.97403	7.97403	11.6023	13.6922	4.50689	4.74716	12.0128	9.31227	1.45501	1.7171	0.565195	0.595327	1.50649	1.16782
186990	Pnp	15	+	24178264	24178274	10	24178271	1	mPAS	protein_coding		1669	0.00186878	0.00145863	0.00070755	0.00169444	0.00107624	0.00145863	0.107412	0.104028	0.0583628	0.112574	0.0798555	0.104028	12	3.48153	4.67862	3.47518	4.1998	3.06453	3.77993	326.682	326.682	326.682	326.682	326.682	119.269	97.1918	122.736	112.635	117.106	113.787	0.365092	0.297513	0.375706	0.344784	0.358471	0.348313
91973	Rasl10b	10	+	68222103	68222123	20	68222118	2	mPAS	protein_coding	XM_006247029.4	12621	0.0009679	0.001414	0.00256676	0.000807237	0.00105345	0.00105345	0.071317	0.102595	0.129797	0.0758445	0.0789023	0.0789023	12	1.52244	1.16672	1.56086	0.522008	0.283776	1.01116	2415.58	2415.58	2415.58	2415.58	2415.58	482.23	508.842	473.56	532.458	520.138	503.445	0.199634	0.21065	0.196044	0.220427	0.215327	0.208416
143319	Cntnap5a	13	+	9694744	9694746	2	9694744	5		protein_coding		1137	0.00176632	0.00100557	0.00288901	0.000603976	0.000562204	0.00100557	0.102923	0.0873976	0.139276	0.0637752	0.05522	0.0873976	12	9.89106	10.0539	9.79683	9.00734	9.78456	9.70673	208.187	208.187	208.187	208.187	208.187	89.4915	89.6822	88.6773	87.9664	92.4274	89.649	0.429861	0.430776	0.42595	0.422535	0.443963	0.430617
125650	Aimp2	12	+	10710767	10710776	9	10710772	3	mPAS	protein_coding	NM_001037348.1	6724	0.00132171	0.00298149	0.00146197	0.000595526	0.000530087	0.00132171	0.0839473	0.156937	0.0913585	0.0632513	0.0534704	0.0839473	12	2.62018	2.77755	3.15521	2.77409	2.52449	2.77031	1269.88	1269.88	1269.88	1269.88	1269.88	214.591	223.096	216.369	224.441	220.023	219.704	0.168985	0.175683	0.170385	0.176742	0.173263	0.173011
378572	Fkbp4	4	-	161703996	161704012	16	161704004	4		protein_coding		2091	0.00130903	0.00124838	0.00162748	0.00133258	0.00139724	0.00133258	0.0838996	0.0952443	0.0967861	0.0991069	0.0954989	0.0954989	12	6.22473	4.9875	5.54231	4.67683	6.28908	5.54409	375.606	375.606	375.606	375.606	375.606	93.2087	131.774	121.163	131.322	89.8415	113.462	0.248156	0.350829	0.322579	0.349626	0.239191	0.302076
466420	Ccnk	6	+	127113186	127113196	10	127113192	1	mPAS	protein_coding		6012	0.00138039	0.00116866	0.00136312	0.00148974	0.00158288	0.00138039	0.0868057	0.0934838	0.086633	0.106846	0.100584	0.0934838	12	2.85517	4.24255	3.02713	2.80023	3.12856	3.21073	1108.95	1108.95	1108.95	1108.95	1108.95	176.397	123.381	180.728	184.289	179.829	168.925	0.159066	0.111259	0.162972	0.166183	0.162161	0.152328
122778	-	12	-	36937469	36937481	12	36937475				-	39	0.00134757	0.00226051	0.00156707	0.00110253	0.000716848	0.00134757	0.0852487	0.133433	0.0946369	0.0884279	0.0635892	0.0884279	12	8.99117	7.54642	7.73577	10.7723	0.313845	7.07191	6.77233	6.77233	6.77233	6.77233	6.77233	10.8972	3.14149	4.28987	11.6475	5.01186	6.99758	1.60908	0.463872	0.63344	1.71986	0.74005	1.03326
434342	Fndc5	5	+	141491232	141491282	50	141491257	4	mPAS	protein_coding		5414	0.000949882	0.000752226	0.000641937	0.0031152	0.00158999	0.000949882	0.0706582	0.0730533	0.0550973	0.167071	0.100584	0.0730533	12	4.28012	6.26774	5.86142	5.18831	5.52199	5.42391	973.076	973.076	973.076	973.076	973.076	529.976	290.256	378.558	485.188	440.702	424.936	0.54464	0.298287	0.389032	0.498613	0.452895	0.436693
433728	Ago3	5	+	138650258	138650260	2	138650258	2		protein_coding	XM_039110020.1	1075	0.000321498	0.00340794	0.00111524	0.00133996	0.000866685	0.00111524	0.0376745	0.169368	0.0780105	0.0994233	0.0708635	0.0780105	12	0.41494	10.5959	10.9776	10.327	10.5491	8.57292	206.096	206.096	206.096	206.096	206.096	76.6566	123.264	123.62	116.823	126.464	113.366	0.371947	0.598092	0.59982	0.566836	0.613617	0.550062
439839	-	6	-	18606297	18606320	23	18606319				-	379	0.00147078	0.00170068	0.00196914	0.00108375	0.000838241	0.00147078	0.0905186	0.115403	0.110095	0.0877973	0.0704233	0.0905186	12	10.0303	11.5169	9.80019	10.9767	9.73169	10.4111	63.6503	63.6503	63.6503	63.6503	63.6503	57.2784	39.0586	57.3082	48.821	58.5326	52.1997	0.899892	0.613644	0.90036	0.767019	0.919597	0.820102
196801	Fkbp8	16	-	18895596	18895623	27	18895609	1	mPAS	protein_coding		47737	0.000507965	0.00278474	0.000326922	0.00230478	0.00116474	0.00116474	0.0501454	0.151027	0.0377529	0.138614	0.0833078	0.0833078	12	6.19371	6.02703	6.03658	3.83256	4.50154	5.31828	9074.41	9074.41	9074.41	9074.41	9074.41	575.556	662.779	657.412	1196.14	1194.07	857.193	0.0634263	0.0730382	0.0724468	0.131815	0.131587	0.0944626
436582	Dnajc16	5	+	154093960	154093960	0	154093960	3		protein_coding	XM_039110431.1	210	0.000580744	0.000839933	0.00127775	0.00323326	0.00118159	0.00118159	0.053926	0.0773153	0.0836648	0.171259	0.0841343	0.0836648	12	3.89055	3.36844	4.10545	3.65909	3.94271	3.79325	35.4739	35.4739	35.4739	35.4739	35.4739	30.043	31.3061	30.1963	30.9039	30.2676	30.5434	0.846906	0.882511	0.851225	0.871173	0.853237	0.86101
91829	Tmem132e	10	+	67386779	67386798	19	67386785	1	mPAS	protein_coding		935	0.00113745	0.000896105	0.000827676	0.00227694	0.00197658	0.00113745	0.0785264	0.0810758	0.0655474	0.137731	0.116026	0.0810758	12	6.21859	4.05027	6.20007	4.52312	5.9437	5.38715	171.683	171.683	171.683	171.683	171.683	26.2947	54.8892	26.8481	55.5187	33.1234	39.3348	0.153159	0.319713	0.156382	0.32338	0.192934	0.229114
123182	-	12	-	39205586	39205610	24	39205592				-	370	0.00052286	0.00393104	0.000932691	0.00143372	0.000371343	0.000932691	0.0501454	0.184127	0.0701055	0.104189	0.0428826	0.0701055	12	8.89883	10.4043	9.25884	11.6906	9.59348	9.9692	63.4518	63.4518	63.4518	63.4518	63.4518	39.9999	41.8387	44.6516	21.9281	46.4434	38.9723	0.630398	0.659378	0.703709	0.345587	0.731947	0.614204
41586	LOC102548320	1	+	91196390	91196400	10	91196397	2		protein_coding		248	0.000599911	0.00298032	0.00258062	0.000358002	0.000673062	0.000673062	0.0549031	0.156937	0.130084	0.0469277	0.0614208	0.0614208	12	10.2075	10.6618	10.1878	10.7392	8.95323	10.1499	43.5684	43.5684	43.5684	43.5684	43.5684	23.0571	21.1509	23.9038	19.8568	25.0735	22.6084	0.529217	0.485464	0.54865	0.455763	0.575497	0.518918
367901	Akr1b7	4	-	63061242	63061242	0	63061242	1		protein_coding	XM_039106919.1	94	0.00166018	0.00105019	0.00112668	0.00196424	0.00149245	0.00149245	0.0985424	0.0878879	0.0782797	0.124757	0.097723	0.097723	12	6.25198	5.84393	4.26442	5.75719	6.1922	5.66194	20.3962	20.3962	20.3962	20.3962	20.3962	8.51758	11.4556	17.0367	11.948	8.98997	11.5896	0.417605	0.561652	0.835285	0.585792	0.440766	0.56822
306767	Ctbs	2	+	235355063	235355092	29	235355088	1	mPAS	protein_coding		578	0.00178063	0.0012278	0.00161159	0.0012534	0.00144401	0.00144401	0.103497	0.0951249	0.0963791	0.0961451	0.0964	0.0963791	12	0.233468	11.3459	0.0544381	10.9877	0.189633	4.56224	107.395	107.395	107.395	107.395	107.395	25.2986	32.3095	27.3863	32.6715	25.9395	28.7211	0.235566	0.300848	0.255006	0.304218	0.241533	0.267434
390662	-	4	+	89576465	89576466	1	89576465				-	524	0.0019057	0.00151189	0.00161335	0.00178153	0.000593717	0.00161335	0.108924	0.106459	0.0963791	0.117378	0.0569093	0.106459	12	10.6912	0.191147	10.1646	10.0084	10.6504	8.34116	96.5149	96.5149	96.5149	96.5149	96.5149	57.0323	28.3815	60.2624	60.1576	60.2819	53.2231	0.590917	0.294064	0.624384	0.623298	0.624587	0.55145
2181	Ptprk	1	-	16820829	16820830	1	16820830	5		protein_coding		102	0.000761661	0.00464459	0.000143469	0.00128647	0.000687224	0.000761661	0.0633196	0.205716	0.0224026	0.0972722	0.0618248	0.0633196	12	6.60894	5.73892	7.92353	6.90267	8.00993	7.0368	18.1447	18.1447	18.1447	18.1447	18.1447	15.3663	16.8699	6.5112	14.2243	6.33134	11.8606	0.846875	0.929741	0.358849	0.783938	0.348936	0.653668
340434	Dipk1b	3	+	9464161	9464170	9	9464162	1	mPAS	protein_coding		1683	0.00127059	0.00104226	0.000574529	0.00159129	0.00306991	0.00127059	0.0828544	0.0878879	0.0517571	0.110059	0.153047	0.0878879	12	2.79546	4.74382	2.98414	3.36755	6.06411	3.99102	288.654	288.654	288.654	288.654	288.654	156.528	141.244	171.055	169.535	45.1552	136.704	0.54227	0.489321	0.592597	0.587329	0.156434	0.47359
97902	Slc25a10	10	+	105773517	105773563	46	105773557	2		protein_coding		643	0.000302839	0.00148344	0.000575314	0.00499568	0.000235566	0.000575314	0.0362915	0.104921	0.0517571	0.222864	0.0332483	0.0517571	12	6.2839	5.14784	6.47992	5.95451	4.58999	5.69123	116.137	116.137	116.137	116.137	116.137	60.6763	75.4846	55.6279	67.2489	72.7136	66.3503	0.522454	0.649961	0.478984	0.579047	0.626101	0.571309
376209	Timp4	4	-	148306300	148306332	32	148306327	3		protein_coding		353	0.000720648	0.00486336	0.000648601	0.00102809	0.000409042	0.000720648	0.060866	0.20992	0.0551946	0.0859183	0.0457393	0.060866	12	7.48148	5.93245	8.03335	7.12405	6.13273	6.94081	63.3272	63.3272	63.3272	63.3272	63.3272	28.6089	31.6607	22.6363	30.916	32.4291	29.2502	0.451764	0.499954	0.35745	0.488195	0.512089	0.46189
338320	LOC100909912	3	-	154734553	154734613	60	154734575	2	mPAS	lncRNA		334	0.00408986	0.000575881	0.00135669	0.000684204	0.000996044	0.000996044	0.175753	0.0615766	0.086633	0.0691819	0.0766133	0.0766133	12	6.62759	6.71848	4.88363	6.27597	4.83063	5.86726	61.1914	61.1914	61.1914	61.1914	61.1914	23.922	22.9923	26.2022	26.3412	26.1309	25.1177	0.390937	0.375744	0.428201	0.430473	0.427035	0.410478
240504	Impact	18	+	4144618	4144651	33	4144621	2		protein_coding		168	0.00146867	0.000672184	0.000319512	0.00435388	0.000903207	0.000903207	0.0905186	0.0686384	0.0371676	0.204839	0.0726155	0.0726155	12	6.5382	4.7126	4.76513	5.80346	5.04528	5.37293	28.4154	28.4154	28.4154	28.4154	28.4154	20.8785	23.619	24.075	24.8544	25.0793	23.7012	0.734761	0.831204	0.847252	0.874682	0.882597	0.834099
506078	Phldb1	8	-	45003536	45003548	12	45003543	1	mPAS	protein_coding		5045	0.000636726	0.00325068	0.00196093	6.0022e-05	0.00187554	0.00187554	0.0564819	0.164644	0.10983	0.0152489	0.11133	0.10983	12	3.79131	4.30923	2.22694	3.05427	2.23517	3.12338	937.644	937.644	937.644	937.644	937.644	156.229	120.442	203.995	213.063	200.565	178.859	0.166619	0.128451	0.217562	0.227232	0.213904	0.190753
406495	-	5	-	60601474	60601477	3	60601476				-	275	0.00167469	0.00200434	0.00249234	0.000655896	0.000967488	0.00167469	0.0990374	0.124078	0.127045	0.0671912	0.0752079	0.0990374	12	10.7968	10.7262	10.7785	10.4313	10.3105	10.6086	50.9508	50.9508	50.9508	50.9508	50.9508	21.0495	21.8393	21.4594	23.5595	24.6572	22.513	0.413134	0.428635	0.421179	0.462397	0.483942	0.441857
149164	Gpr161	13	+	77623569	77623609	40	77623593	2		protein_coding		498	0.00081515	0.00503014	0.000182082	0.00135379	0.000440544	0.00081515	0.0658695	0.214132	0.0262835	0.0995195	0.0484736	0.0658695	12	9.58735	11.6678	9.45983	0.00949866	10.3205	8.20901	91.7515	91.7515	91.7515	91.7515	91.7515	37.0687	24.506	35.5255	19.4236	36.1067	30.5261	0.404012	0.267091	0.387193	0.211698	0.393527	0.332704
117824	Fry	12	-	4493927	4493967	40	4493957	7	mPAS	protein_coding	XM_039089334.1	1447	0.000268712	0.00296696	0.000651281	0.00343351	0.000549122	0.000651281	0.0333339	0.156775	0.0551946	0.17721	0.0546246	0.0551946	12	0.228296	10.873	10.2874	0.265214	11.1355	6.55788	265.139	265.139	265.139	265.139	265.139	50.5769	75.47	74.5814	49.7531	73.9035	64.857	0.190756	0.284643	0.281291	0.187649	0.278735	0.244615
346986	-	3	+	65275028	65275054	26	65275048				-	484	0.00092314	0.00153083	0.00112058	0.00214322	0.00218343	0.00153083	0.0701343	0.107317	0.0782114	0.133117	0.122508	0.107317	12	9.71141	8.12263	10.1954	9.22618	9.43278	9.33768	88.2288	88.2288	88.2288	88.2288	88.2288	25.9909	35.408	19.3286	31.4527	28.2392	28.0839	0.294586	0.401321	0.219073	0.35649	0.320067	0.318308
545719	Ppp2r5d	9	+	14299710	14299722	12	14299717	2		protein_coding		569	0.000284247	0.00189174	0.00134753	0.00400187	0.000431304	0.00134753	0.0343225	0.121121	0.0862774	0.194919	0.0477245	0.0862774	12	7.81621	6.86423	7.92434	8.60589	8.32445	7.90702	105.637	105.637	105.637	105.637	105.637	37.1507	38.6823	36.1391	29.9943	31.1256	34.6184	0.351684	0.366183	0.342108	0.283939	0.294648	0.327712
560242	Gk	X	-	50162262	50162275	13	50162271	2		protein_coding		122	0.00146333	0.000170157	0.00376705	0.00152828	0.00103578	0.00146333	0.0904104	0.0277111	0.161039	0.107852	0.0783173	0.0904104	12	8.18604	5.92543	7.00131	7.41723	5.86984	6.87997	21.9124	21.9124	21.9124	21.9124	21.9124	6.59397	14.1944	12.7475	11.0565	14.1499	11.7485	0.300924	0.647779	0.581749	0.504578	0.645751	0.536156
361196	Nom1	4	-	5891192	5891231	39	5891219	5	mPAS	protein_coding		171	0.00112291	0.00272266	0.00189792	0.000256957	0.00197235	0.00189792	0.0780608	0.149075	0.107821	0.0374618	0.115992	0.107821	12	9.58489	8.5859	9.2011	8.3748	9.21691	8.99272	31.9941	31.9941	31.9941	31.9941	31.9941	10.4932	15.4303	13.6002	16.4952	12.8414	13.7721	0.327972	0.482285	0.425087	0.515572	0.401368	0.430457
75099	Trim37	10	-	72051594	72051595	1	72051594	5	mPAS	protein_coding	XM_006247099.4	90	0.00124352	0.00356735	0.00146539	0.000840526	0.000868026	0.00124352	0.0819306	0.173213	0.0913585	0.076483	0.0708635	0.0819306	12	5.08079	4.81204	4.80313	5.6787	4.79771	5.03447	20.8364	20.8364	20.8364	20.8364	20.8364	28.2875	26.6518	26.7554	28.9316	26.8222	27.4897	1.3576	1.2791	1.28407	1.38851	1.28727	1.31931
161600	Mdh1	14	-	95630288	95630307	19	95630305	4		protein_coding		12762	0.00171117	0.000305982	0.00180369	0.00126104	0.0031323	0.00171117	0.100819	0.0401531	0.10358	0.096498	0.155183	0.100819	12	10.5909	10.9355	0.280445	10.7148	11.9785	8.90003	2436.29	2436.29	2436.29	2436.29	2436.29	362.875	350.858	192.64	370.438	239.711	303.304	0.148946	0.144014	0.0790711	0.15205	0.0983917	0.124495
55460	LOC120099964	1	+	199155627	199155656	29	199155637	1		protein_coding	XM_039101305.1	75	0.00155298	0.0014492	0.00338695	0.00090467	0.00110329	0.0014492	0.0942979	0.103654	0.153	0.0804751	0.0811047	0.0942979	12	4.65442	6.4768	4.76534	5.57151	4.44074	5.18176	14.2384	14.2384	14.2384	14.2384	14.2384	11.1073	7.2865	10.9583	10.0564	10.6606	10.0138	0.780091	0.511748	0.769625	0.706287	0.748722	0.703295
559812	LOC100361934	X	-	39446578	39446598	20	39446583	2		protein_coding	XM_039100127.1	3241	0.000415437	0.000692682	0.000350816	0.00625386	0.000826164	0.000692682	0.0443781	0.0698334	0.0395066	0.256169	0.070151	0.0698334	12	5.06435	6.66663	6.26066	6.11696	6.02311	6.02634	626.281	626.281	626.281	626.281	626.281	400.179	298.847	342.818	356.844	364.497	352.637	0.638976	0.477178	0.547386	0.569782	0.582001	0.563065
389388	-	4	+	76789495	76789531	36	76789526				-	34	0.00207191	0.00131922	0.00128693	0.00215	0.00172428	0.00172428	0.114991	0.0990065	0.084093	0.133117	0.10571	0.10571	12	0.245875	10.3084	10.0621	0.0394059	0.269897	4.18513	5.87631	5.87631	5.87631	5.87631	5.87631	4.07735	7.6503	7.55314	4.75305	4.01421	5.60961	0.693863	1.30189	1.28536	0.808849	0.683119	0.954615
276910	Syt11	2	-	174206111	174206234	123	174206199	3		protein_coding		9081	0.00057055	0.00346172	0.00225147	0.00120424	0.00108188	0.00120424	0.0534341	0.170705	0.119365	0.0933358	0.0800868	0.0933358	12	6.05391	8.19815	7.67276	8.2659	5.16308	7.07076	1690.79	1690.79	1690.79	1690.79	1690.79	685.689	392.395	523.814	354.115	569.852	505.173	0.405543	0.232078	0.309804	0.209437	0.337033	0.298779
238280	-	18	-	66466381	66466382	1	66466382				-	145	0.000935175	0.00287214	0.00113131	0.00151929	0.00211904	0.00151929	0.0706582	0.153546	0.0782797	0.107457	0.120432	0.107457	12	5.27856	6.38665	6.23912	4.56851	6.35701	5.76597	27.003	27.003	27.003	27.003	27.003	20.1781	12.8895	14.1328	21.0057	13.0853	16.2583	0.747256	0.477335	0.523378	0.777904	0.484585	0.602091
277159	Kcnn3	2	-	175007769	175007776	7	175007769	3		protein_coding	XM_039102982.1	149	0.00105435	0.00347701	0.000811733	0.00181242	0.00147904	0.00147904	0.0751065	0.171193	0.0647693	0.117964	0.0972463	0.0972463	12	10.0419	11.7904	9.97882	10.2819	9.68228	10.3551	23.7987	23.7987	23.7987	23.7987	23.7987	21.7628	8.93242	22.75	20.5653	23.0521	19.4125	0.914452	0.375332	0.955935	0.864137	0.968626	0.815697
223453	Fam193b	17	+	9099507	9099513	6	9099511	2	mPAS	protein_coding	XM_006253651.4	507	0.00225582	0.000804829	0.00114235	0.00118044	0.0033472	0.00118044	0.120603	0.0751313	0.0782797	0.0921058	0.161301	0.0921058	12	6.62543	5.29925	6.30756	5.17762	6.61211	6.00439	95.0885	95.0885	95.0885	95.0885	95.0885	39.8006	51.9741	44.7012	52.6586	39.6757	45.762	0.418563	0.546586	0.470101	0.553784	0.41725	0.481257
462312	Plek2	6	+	97700645	97700675	30	97700664	2		protein_coding	XM_039112281.1	751	0.00346413	0.00141763	0.00242638	0.000644475	0.000853937	0.00141763	0.158403	0.102595	0.125602	0.06645	0.0707426	0.102595	12	1.24593	1.18167	1.52327	0.516655	0.138298	0.921165	139.712	139.712	139.712	139.712	139.712	38.0079	38.4966	35.3761	41.6715	42.0323	39.1169	0.272044	0.275542	0.253207	0.298266	0.300849	0.279982
486523	Gng7	7	+	8761127	8761170	43	8761130	4		protein_coding	XM_039079814.1	1543	0.000727164	0.00324736	0.000480687	0.00365662	0.000721393	0.000727164	0.0611362	0.164644	0.0468607	0.184481	0.0636156	0.0636156	12	3.06176	3.36835	3.48285	3.41428	4.921	3.64965	288.689	288.689	288.689	288.689	288.689	114.215	125.588	127.526	127.073	111.756	121.231	0.395634	0.435028	0.441741	0.440172	0.387114	0.419938
71832	-	10	-	55705756	55705763	7	55705761				-	217	0.000707138	0.00296489	0.00100337	0.000508539	0.00370558	0.00100337	0.0602053	0.156775	0.0733937	0.0585134	0.171478	0.0733937	12	11.2063	10.4523	0.285347	10.9121	11.4877	8.86876	39.3793	39.3793	39.3793	39.3793	39.3793	17.429	18.207	12.2425	17.6806	16.6067	16.4332	0.442594	0.462349	0.310887	0.448984	0.421711	0.417305
430878	-	5	+	121425817	121425865	48	121425844				-	215	0.000786948	0.00151543	0.00092289	0.00212856	0.00355464	0.00151543	0.0640798	0.106472	0.0697814	0.132542	0.166989	0.106472	12	8.05151	6.2339	7.64472	6.55026	8.39252	7.37458	40.8793	40.8793	40.8793	40.8793	40.8793	16.56	21.5814	19.9739	22.2291	13.502	18.7693	0.405094	0.527928	0.488606	0.543774	0.33029	0.459138
185734	Fezf2	15	+	12777537	12777574	37	12777547	2	mPAS	protein_coding		825	0.00122926	0.00250908	0.000635255	0.0041645	0.000406661	0.00122926	0.081159	0.142729	0.0550075	0.199791	0.0456337	0.081159	12	5.89055	5.48962	4.40809	4.62565	5.16981	5.11675	152.108	152.108	152.108	152.108	152.108	47.6423	54.0824	58.6709	58.5889	57.0045	55.1978	0.313214	0.355553	0.385719	0.38518	0.374763	0.362886
170058	Man2b2	14	+	73994088	73994114	26	73994090	2	mPAS	protein_coding		1438	0.00175826	0.00198104	0.0011528	0.0029211	0.00113712	0.00175826	0.102642	0.123672	0.0782797	0.160772	0.0820764	0.102642	12	11.9837	11.925	9.84462	11.0022	9.9498	10.9411	276.53	276.53	276.53	276.53	276.53	45.4071	47.3711	81.0727	70.4466	78.2037	64.5002	0.164203	0.171306	0.293179	0.254752	0.282804	0.233249
211278	Slc25a15	16	+	69654864	69654871	7	69654869	1	mPAS	protein_coding	XM_039094589.1	558	0.000872795	0.00196344	0.00441407	0.000941484	0.000784523	0.000941484	0.0685309	0.123389	0.176546	0.0821374	0.0678858	0.0821374	12	1.68581	1.72143	2.76048	1.51205	2.81607	2.09917	105.044	105.044	105.044	105.044	105.044	42.4787	41.6506	36.447	44.2354	34.6533	39.893	0.404388	0.396504	0.346968	0.421112	0.329891	0.379773
191855	-	15	+	84706463	84706464	1	84706464				-	63	0.00140593	0.00267614	0.00262997	0.000212522	0.00210134	0.00210134	0.0877174	0.147648	0.131735	0.0339148	0.120238	0.120238	12	5.62747	4.65971	5.4408	4.66677	4.62762	5.00448	13.6999	13.6999	13.6999	13.6999	13.6999	17.0118	16.2804	17.3385	16.1419	16.5222	16.659	1.24175	1.18836	1.2656	1.17825	1.20601	1.21599
549238	Tmeff2	9	+	50676101	50676133	32	50676102	6		protein_coding	NM_001108795.1	17524	0.000627831	0.00380543	0.00100496	0.001519	0.00208828	0.001519	0.0559893	0.181183	0.0733937	0.107457	0.119818	0.107457	12	10.6597	9.98921	10.4483	10.8027	11.5789	10.6957	3231.33	3231.33	3231.33	3231.33	3231.33	1987.04	2151.01	2094.75	1905.53	1486.72	1925.01	0.614928	0.665672	0.648261	0.589703	0.460096	0.595732
350944	Ivd	3	+	105872509	105872538	29	105872517	2		protein_coding		2029	0.000683363	0.000815921	0.00136671	0.00219094	0.00399882	0.00136671	0.0588809	0.0757299	0.086633	0.134061	0.17945	0.086633	12	5.79171	6.35461	5.80826	4.5698	6.28682	5.76224	377.508	377.508	377.508	377.508	377.508	79.908	58.7144	79.658	102.16	61.2485	76.3377	0.211672	0.155532	0.21101	0.270616	0.162244	0.202215
23119	Adam12	1	-	188836621	188836625	4	188836624	3		protein_coding		516	0.00089078	0.00122054	0.00220568	0.000970224	0.00381835	0.00122054	0.0688142	0.0951249	0.117526	0.0832741	0.174223	0.0951249	12	0.067749	10.3215	0.091274	10.7291	11.1544	6.4728	90.804	90.804	90.804	90.804	90.804	32.7406	57.2178	32.0926	53.9486	51.8272	45.5654	0.360564	0.630124	0.353427	0.594121	0.570759	0.501799
275375	-	2	-	157610302	157610303	1	157610303				-	70	0.00211495	0.0017775	0.00168337	0.00231773	0.00122893	0.0017775	0.11595	0.116668	0.099366	0.138614	0.0869198	0.11595	12	10.4694	11.8596	8.85135	10.2152	10.8134	10.4418	11.1566	11.1566	11.1566	11.1566	11.1566	11.4807	5.29839	11.4284	12.0716	10.6516	10.1861	1.02905	0.47491	1.02436	1.08201	0.954732	0.913013
480336	Ptk2	7	-	105126945	105126957	12	105126954	5		protein_coding	XM_039078472.1	1373	0.00117027	0.000435999	0.00369226	0.0034788	0.000346852	0.00117027	0.0799135	0.0518316	0.15989	0.179054	0.0415597	0.0799135	12	3.62655	3.28057	4.84598	3.07148	2.83586	3.53209	253.209	253.209	253.209	253.209	253.209	61.727	58.0942	49.9628	57.394	57.4783	56.9312	0.243779	0.229432	0.197318	0.226666	0.227	0.224839
506065	LOC120094346	8	-	44811464	44811494	30	44811465	1		protein_coding		122	0.00400366	0.00112344	0.00263662	0.000329261	0.0010678	0.00112344	0.173221	0.0911139	0.13186	0.0452656	0.0794147	0.0911139	12	3.94685	3.23147	2.49357	3.41492	3.85427	3.38822	22.7724	22.7724	22.7724	22.7724	22.7724	17.3899	20.4137	21.5209	20.9414	18.2007	19.6933	0.763639	0.896423	0.945044	0.919595	0.799243	0.864789
39783	Zfp180	1	+	79672217	79672231	14	79672227	3		protein_coding		484	0.000569721	0.000874676	0.00205924	0.00494903	0.000737391	0.000874676	0.0534341	0.0795905	0.113533	0.222547	0.0643333	0.0795905	12	0.712066	11.2555	11.968	0.826506	11.197	7.19182	92.6787	92.6787	92.6787	92.6787	92.6787	32.486	39.6154	38.5844	31.9052	38.9862	36.3154	0.350523	0.427449	0.416324	0.344256	0.42066	0.391842
309438	Srpk1	20	-	6647494	6647523	29	6647510	3		protein_coding		425	0.0011575	0.00420142	0.000332217	0.00240859	0.00113719	0.0011575	0.0792213	0.192254	0.0380742	0.141386	0.0820764	0.0820764	12	8.22257	8.3179	7.94619	6.1939	8.17112	7.77034	79.2509	79.2509	79.2509	79.2509	79.2509	21.7946	20.0417	24.1249	31.2669	22.3016	23.906	0.275008	0.25289	0.304412	0.394531	0.281405	0.301649
105978	Stxbp5l	11	-	63339108	63339110	2	63339109	2		protein_coding	NM_001271250.1	187	0.00315007	0.00323633	0.000868348	0.00113503	0.000996357	0.00113503	0.149756	0.164442	0.0675886	0.0903218	0.0766133	0.0903218	12	8.13488	8.35042	6.72289	8.23672	8.45624	7.98023	35.0473	35.0473	35.0473	35.0473	35.0473	15.0742	12.9381	19.0996	14.5313	13.0044	14.9295	0.430111	0.36916	0.544967	0.41462	0.371052	0.425982
223570	Uimc1	17	+	9575027	9575068	41	9575067	4		protein_coding		60	0.00324388	0.00211964	0.00167079	0.000915921	0.00147435	0.00167079	0.152616	0.128461	0.0989911	0.0812483	0.0972463	0.0989911	12	10.0613	9.97404	9.06465	10.1377	9.82453	9.81243	9.68897	9.68897	9.68897	9.68897	9.68897	9.98413	9.95076	8.96367	10.0278	9.648	9.71487	1.03046	1.02702	0.925141	1.03497	0.995771	1.00267
558749	-	X	-	22478637	22478638	1	22478638				-	102	0.000859082	0.00389116	0.00158366	0.00114733	0.00196354	0.00158366	0.0680898	0.183373	0.0950703	0.0906362	0.115688	0.0950703	12	10.7366	11.5324	10.3266	11.8657	10.4874	10.9897	19.9614	19.9614	19.9614	19.9614	19.9614	23.087	18.8855	23.8589	16.032	24.7054	21.3138	1.15658	0.946097	1.19525	0.80315	1.23766	1.06775
393496	Mogs	4	+	115625019	115625036	17	115625027	1	mPAS	protein_coding		774	0.00194014	0.00178622	0.000881394	0.00316193	0.00175768	0.00178622	0.110417	0.116718	0.0681072	0.168424	0.107213	0.110417	12	6.19491	5.9995	5.45667	5.82951	5.17156	5.73043	135.145	135.145	135.145	135.145	135.145	29.9871	35.6661	49.5311	40.4253	54.9543	42.1128	0.221888	0.26391	0.366503	0.299125	0.406631	0.311611
99051	-	11	-	6838130	6838130	0	6838130				-	298	0.000948442	0.00104179	0.000483185	0.00606748	0.00100569	0.00100569	0.0706582	0.0878879	0.0468607	0.252224	0.0769584	0.0769584	12	6.68978	6.45377	4.65784	6.41644	6.64914	6.17339	56.4306	56.4306	56.4306	56.4306	56.4306	20.2906	22.5826	25.4616	22.9082	20.6122	22.3711	0.359568	0.400184	0.451203	0.405954	0.365267	0.396435
165439	Epha5	14	+	24008208	24008238	30	24008224	7		protein_coding		383	0.00153249	0.00362318	0.00152865	0.00160487	0.00128329	0.00153249	0.0934112	0.174983	0.0934668	0.110059	0.0894001	0.0934668	12	10.5015	11.3129	11.1649	10.8117	11.9213	11.1425	72.0676	72.0676	72.0676	72.0676	72.0676	49.1891	44.0568	46.5892	47.1138	34.8743	44.3647	0.682542	0.611326	0.646466	0.653745	0.483912	0.615598
395522	-	4	+	135846537	135846538	1	135846537				-	160	0.00104027	0.00216359	0.00253393	0.00114013	0.00274157	0.00216359	0.0748835	0.130131	0.128752	0.0903218	0.141171	0.128752	12	10.5874	11.8669	9.88573	10.5277	8.97322	10.3682	26.0759	26.0759	26.0759	26.0759	26.0759	25.6931	12.0268	30.0034	25.9792	29.0021	24.5409	0.98532	0.461221	1.15062	0.99629	1.11222	0.941134
333672	Acoxl	3	-	115283578	115283578	0	115283578	2		protein_coding	XM_039104573.1	271	0.00147395	0.00137618	0.00214378	0.00165147	0.00303942	0.00165147	0.0905384	0.101344	0.116178	0.110879	0.152011	0.110879	12	2.71388	2.9479	4.17562	2.95377	4.42472	3.44318	45.6159	45.6159	45.6159	45.6159	45.6159	40.4329	41.039	37.0846	40.3173	33.0386	38.3825	0.886376	0.899663	0.812975	0.883842	0.724277	0.841426
233803	Slc25a46	18	-	23215940	23215967	27	23215965	3	mPAS	protein_coding		3258	0.000320666	0.000738818	0.000357999	0.0032923	0.00502323	0.000738818	0.0376745	0.0724155	0.0400897	0.173115	0.207983	0.0724155	12	4.36911	6.28189	6.30179	4.58195	4.32675	5.1723	616.516	616.516	616.516	616.516	616.516	136.84	101.139	99.3652	140.006	138.418	123.154	0.221956	0.16405	0.161172	0.227092	0.224517	0.199757
108710	Hic2	11	-	83738897	83738942	45	83738942	3		protein_coding	XM_039088073.1	278	0.00283366	0.000817941	0.00117077	0.00359875	0.00135891	0.00135891	0.139517	0.0757299	0.0789388	0.182857	0.0942247	0.0942247	12	6.87541	5.62509	4.99999	5.81515	6.88228	6.03958	53.1975	53.1975	53.1975	53.1975	53.1975	28.9521	34.6068	32.0352	34.8168	29.1398	31.9101	0.544238	0.650534	0.602193	0.654481	0.547767	0.599843
497323	Ep300	7	+	113178261	113178269	8	113178266	4		protein_coding	XM_039080287.1	61	0.000678926	0.00257052	0.00398565	0.00103143	0.00156897	0.00156897	0.0587484	0.144355	0.166105	0.0859714	0.100555	0.100555	12	4.85471	6.14661	6.20273	4.30142	4.19925	5.14094	10.4255	10.4255	10.4255	10.4255	10.4255	9.98611	5.93064	5.63219	10.618	10.6689	8.56717	0.957857	0.56886	0.540233	1.01847	1.02335	0.821754
314027	Armc2	20	-	45470666	45470668	2	45470666	3		protein_coding		21	0.00312578	0.0014445	0.00178315	0.0007527	0.00282127	0.00178315	0.148824	0.103551	0.102959	0.0735492	0.144742	0.103551	12	1.56536	1.97277	2.08433	3.31914	2.83686	2.35569	5.11716	5.11716	5.11716	5.11716	5.11716	9.99272	9.8195	10.4397	8.31394	9.35092	9.58335	1.95279	1.91894	2.04013	1.62472	1.82736	1.87279
486096	-	7	+	4771166	4771166	0	4771166				-	57	0.000782824	0.0009608	0.00117819	0.0061098	0.0010663	0.0010663	0.0639079	0.0842876	0.0792709	0.252971	0.0794147	0.0794147	12	6.38382	6.63331	5.25293	5.85139	5.61612	5.94751	10.8414	10.8414	10.8414	10.8414	10.8414	10.2	9.35964	11.7682	11.4335	11.6994	10.8922	0.940839	0.863322	1.08549	1.05461	1.07914	1.00468
432655	Slc2a1	5	+	132745385	132745424	39	132745417	3	mPAS	protein_coding		4154	0.00243117	0.00102793	0.00483724	0.000240988	0.00158906	0.00158906	0.125629	0.0878879	0.187874	0.0363711	0.100584	0.100584	12	4.32319	2.18739	4.32913	2.49368	2.79702	3.22608	775.469	775.469	775.469	775.469	775.469	123.632	232.185	127.751	241.577	228.786	190.786	0.159429	0.299412	0.164741	0.311523	0.295029	0.246027
202195	Mcf2l	16	-	76507130	76507160	30	76507139	2	mPAS	protein_coding		6757	0.000776227	0.00104137	0.00156915	0.00549543	0.00125761	0.00125761	0.0636968	0.0878879	0.0946369	0.236155	0.0885543	0.0885543	12	3.96032	6.06456	4.92884	3.11585	3.36253	4.28642	1253.63	1253.63	1253.63	1253.63	1253.63	334.815	143.832	297.297	309.193	335.636	284.155	0.267076	0.114733	0.237149	0.246638	0.267731	0.226665
58752	Pip5k1b	1	+	221975551	221975565	14	221975552	5		protein_coding	XM_039080211.1	42	0.00164786	0.00207978	0.00177626	0.00261332	0.00208488	0.00207978	0.0981819	0.127679	0.102748	0.149265	0.119818	0.119818	12	9.57186	0.332445	8.4307	10.3531	9.53992	7.64561	6.77229	6.77229	6.77229	6.77229	6.77229	9.96235	1.50274	8.38758	9.18616	10.2564	7.85905	1.47105	0.221895	1.23852	1.35643	1.51447	1.16047
206999	Galnt7	16	+	32702157	32702200	43	32702172	4		protein_coding	XM_006253083.3	202	0.000837384	0.00648903	0.000675798	0.000838659	0.00139045	0.000838659	0.0669844	0.246203	0.0564771	0.076483	0.0954989	0.076483	12	10.7137	9.20019	10.6395	11.8693	10.1643	10.5174	35.6299	35.6299	35.6299	35.6299	35.6299	22.9304	21.5311	23.1388	15.3525	24.1773	21.426	0.643572	0.604299	0.649421	0.43089	0.678567	0.60135
120465	Rhbdd2	12	-	21043602	21043633	31	21043603	1	mPAS	protein_coding		1829	0.000592008	0.0012341	0.000572698	0.00702927	0.000855143	0.000855143	0.0544939	0.0951249	0.0517571	0.272896	0.0707426	0.0707426	12	4.40008	5.78888	6.37283	5.12846	5.23239	5.38453	332.259	332.259	332.259	332.259	332.259	137.288	112.588	84.4434	132.261	130.664	119.449	0.413196	0.338854	0.254149	0.398066	0.39326	0.359505
552332	Wnt10a	9	+	76362400	76362403	3	76362400	2	mPAS	protein_coding	NM_001108227.2	603	0.00152715	0.00176956	0.00111069	0.00543501	0.000445892	0.00152715	0.0932647	0.116668	0.0780105	0.234192	0.0486604	0.0932647	12	3.40867	4.40759	4.33689	3.37037	4.00363	3.90543	113.375	113.375	113.375	113.375	113.375	34.5707	36.447	35.246	35.6126	36.6604	35.7073	0.304922	0.321472	0.310879	0.314112	0.323354	0.314948
229984	-	17	+	74429913	74429913	0	74429913				-	54	0.00306982	0.00182451	0.00120179	0.00187096	0.0023345	0.00187096	0.14781	0.118022	0.0803481	0.120032	0.12871	0.120032	12	10.6638	10.634	10.3575	10.6033	10.0101	10.4537	9.97935	9.97935	9.97935	9.97935	9.97935	8.31219	8.37386	9.34444	8.80375	9.93959	8.95477	0.832939	0.839119	0.936378	0.882197	0.996016	0.89733
18421	Acer3	1	-	152505344	152505404	60	152505392	5		protein_coding		297	0.000748354	0.00123368	0.00157048	0.00585806	0.00095726	0.00123368	0.0627057	0.0951249	0.0946369	0.24627	0.0752079	0.0946369	12	9.44824	8.33963	8.18815	8.86101	10.136	8.99461	54.4242	54.4242	54.4242	54.4242	54.4242	19.4816	23.2813	23.3884	21.2467	12.9335	20.0663	0.357958	0.427774	0.429743	0.390391	0.237642	0.368702
36914	Qk	1	+	50490779	50490800	21	50490782	10		protein_coding		63	0.0034645	0.000392568	0.000498005	0.00426927	0.00183874	0.00183874	0.158403	0.0483209	0.0479247	0.203159	0.109968	0.109968	12	4.80984	6.79854	5.0417	5.77996	4.78329	5.44267	10.5033	10.5033	10.5033	10.5033	10.5033	14.1742	12.1053	14.2692	14.9193	13.8116	13.8559	1.3495	1.15253	1.35855	1.42045	1.31498	1.3192
281554	Ank2	2	-	215776171	215776177	6	215776172	8		protein_coding		328	0.00145547	0.000397914	0.00109066	0.00428961	0.00328497	0.00145547	0.0902759	0.0487687	0.0776595	0.203159	0.160001	0.0902759	12	5.85369	6.37914	6.90603	5.95087	6.26192	6.27033	59.1255	59.1255	59.1255	59.1255	59.1255	32.379	30.6659	27.2013	32.2875	31.3085	30.7684	0.547633	0.518658	0.46006	0.546085	0.529527	0.520393
398298	Slc25a18	4	+	154021360	154021380	20	154021368	2	mPAS	protein_coding	NM_001044280.2	4652	0.000523741	0.0064238	0.000856941	0.000821369	0.00198117	0.000856941	0.0501454	0.244679	0.0668645	0.0763568	0.116081	0.0763568	12	2.03368	3.65296	2.31525	3.81231	2.04	2.77084	864.932	864.932	864.932	864.932	864.932	142.76	109.413	146.137	105.349	144.065	129.545	0.165053	0.126499	0.168958	0.1218	0.166563	0.149774
146580	Nek7	13	+	50031210	50031211	1	50031210	3		protein_coding	XM_006249926.4	827	0.00227532	0.00222996	0.00130468	0.00279162	0.00201369	0.00222996	0.121107	0.132555	0.0849032	0.156354	0.117337	0.121107	12	0.11045	0.040673	10.866	11.9387	9.84458	6.56008	152.015	152.015	152.015	152.015	152.015	37.0865	39.8871	75.2588	43.962	87.9108	56.821	0.243966	0.26239	0.495075	0.289195	0.578303	0.373786
281211	Ank2	2	-	215402649	215402726	77	215402691	8		protein_coding	XM_039104001.1	138	0.00366002	0.000470332	0.000559112	0.00297665	0.00299126	0.00297665	0.164401	0.0545121	0.0512307	0.161589	0.150545	0.150545	12	4.93893	5.00726	6.45994	5.47025	6.35584	5.64644	22.9393	22.9393	22.9393	22.9393	22.9393	29.0151	27.8625	28.0315	30.636	28.5652	28.8221	1.26486	1.21462	1.22198	1.33552	1.24525	1.25645
419802	Atp5h-ps1	5	-	166164309	166164328	19	166164324	1	mPAS			3585	0.00110794	0.00282242	0.000631714	0.00105081	0.00507178	0.00110794	0.0776709	0.151918	0.0550075	0.0865836	0.209447	0.0865836	12	6.35873	5.83981	5.08834	6.40864	6.09442	5.95799	656.953	656.953	656.953	656.953	656.953	163.81	213.269	260.097	159.839	190.343	197.472	0.249348	0.324633	0.395914	0.243304	0.289737	0.300587
487947	LOC691921	7	+	21108112	21108124	12	21108116	4	mPAS	protein_coding		942	0.00166322	0.00213533	0.00132401	0.00304728	0.00253817	0.00213533	0.0985424	0.128847	0.0854604	0.164299	0.134791	0.128847	12	0.290705	11.174	11.984	10.6963	11.8951	9.20803	176.768	176.768	176.768	176.768	176.768	19.9846	31.7532	24.1259	33.7505	25.2373	26.9703	0.113055	0.179632	0.136483	0.190931	0.14277	0.152574
130916	Git2	12	+	41837330	41837334	4	41837334	5		protein_coding		129	0.00175392	0.00308263	0.00209689	0.000476106	0.00330262	0.00209689	0.102577	0.159739	0.11501	0.0559989	0.160614	0.11501	12	2.82925	4.01207	4.14674	3.75984	2.17078	3.38374	24.2729	24.2729	24.2729	24.2729	24.2729	27.5876	16.9593	15.9392	21.5016	29.4435	22.2862	1.13656	0.698691	0.656667	0.885829	1.21302	0.918153
179269	Lcp1	15	-	50527865	50527876	11	50527868	2		protein_coding	XM_006252320.4	346089	0.00131099	0.00462222	0.00213762	0.00131135	0.00143067	0.00143067	0.0838996	0.205011	0.116178	0.0984503	0.0960546	0.0984503	12	10.6504	9.7745	9.89468	10.21	10.1112	10.1282	62129	62129	62129	62129	62129	19034.6	24184.1	24048.3	22363.3	23111.1	22548.3	0.306373	0.389257	0.387071	0.359949	0.371985	0.362927
274575	-	2	-	143252137	143252146	9	143252140				-	168	0.00473823	0.00178177	0.00277286	7.00278e-05	0.00147736	0.00178177	0.192666	0.116668	0.136101	0.0164001	0.0972463	0.116668	12	7.5879	7.80623	8.21922	8.36988	8.16754	8.03015	30.5211	30.5211	30.5211	30.5211	30.5211	18.5407	17.4081	14.5312	14.4185	15.2086	16.0214	0.607472	0.570363	0.476103	0.472411	0.498299	0.52493
458555	Nrcam	6	+	61697684	61697689	5	61697685	8		protein_coding		67	0.00231713	0.0019789	0.00132182	0.00186158	0.00336414	0.0019789	0.122642	0.123672	0.0854604	0.119672	0.161627	0.122642	12	8.01074	5.57991	6.63636	6.84796	6.86872	6.78874	13.1392	13.1392	13.1392	13.1392	13.1392	5.63639	15.9147	14.5522	13.7077	13.4436	12.6509	0.428976	1.21124	1.10754	1.04327	1.02317	0.962841
413789	-	5	-	133302095	133302104	9	133302099				-	67	0.00211423	0.00125065	0.00338531	0.000768156	0.00335882	0.00211423	0.11595	0.0952443	0.153	0.0741171	0.161615	0.11595	12	9.31351	10.163	10.5654	10.6123	10.0001	10.1309	12.0399	12.0399	12.0399	12.0399	12.0399	14.5671	14.2628	14.1742	13.7362	15.1975	14.3875	1.2099	1.18463	1.17727	1.14089	1.26226	1.19499
59914	Marchf5	1	+	234952621	234952651	30	234952627	5		protein_coding		2368	0.00106576	0.0012471	0.00198086	0.00287125	0.00372809	0.00198086	0.0753792	0.0952443	0.110362	0.159132	0.171833	0.110362	12	9.73453	8.40191	10.2556	9.50936	10.1315	9.60658	450.405	450.405	450.405	450.405	450.405	61.3731	72.5134	45.436	64.2899	48.6386	58.4502	0.136262	0.160996	0.100878	0.142738	0.107988	0.129772
123310	-	12	-	39536414	39536415	1	39536414				-	109	0.00100206	0.00534914	0.000872421	0.0010246	0.00265185	0.0010246	0.07282	0.221766	0.0677395	0.0858879	0.138486	0.0858879	12	8.9346	8.89317	8.99792	10.6427	8.99252	9.29218	19.2823	19.2823	19.2823	19.2823	19.2823	15.8677	15.1925	15.9002	14.2139	15.7092	15.3767	0.822919	0.787898	0.824604	0.737149	0.814699	0.797454
490364	Ccdc59	7	+	41149460	41149476	16	41149462	2		protein_coding		430	0.00210979	0.00258646	0.00260454	0.00139176	0.00224994	0.00224994	0.11595	0.144864	0.131081	0.102074	0.125353	0.125353	12	10.9707	10.365	11.7344	10.8174	10.2088	10.8192	82.7257	82.7257	82.7257	82.7257	82.7257	23.6673	24.1806	19.2741	23.831	24.3895	23.0685	0.286093	0.292298	0.232988	0.288073	0.294823	0.278855
37172	LOC120100106	1	+	53872728	53872729	1	53872728	1		lncRNA	XR_005499869.1	66	0.00149909	0.00414556	0.0027957	0.00170526	0.000815308	0.00170526	0.0917275	0.190522	0.136941	0.113056	0.0696015	0.113056	12	9.21407	11.557	8.76962	8.78237	9.51917	9.56844	11.2949	11.2949	11.2949	11.2949	11.2949	10.2111	4.85836	9.47968	9.77229	10.6491	8.9941	0.904042	0.430137	0.839288	0.865194	0.942823	0.796297
264620	Cert1	2	-	27986700	27986720	20	27986719	3		protein_coding		1024	0.00070436	0.000559849	0.000624854	0.00416481	0.00501034	0.00070436	0.0602053	0.0608084	0.0548162	0.199791	0.207983	0.0608084	12	4.86573	6.39567	5.15392	4.43163	6.42052	5.45349	188.866	188.866	188.866	188.866	188.866	100.198	64.9065	97.6819	99.1965	63.4551	85.0877	0.530528	0.343665	0.517204	0.525223	0.33598	0.45052
340978	Coq4	3	+	13068798	13068806	8	13068804	2		protein_coding		232	0.000974236	0.00571968	0.000691408	0.00225611	0.00156069	0.00156069	0.0716176	0.230358	0.0572401	0.136993	0.100533	0.100533	12	3.89516	4.55541	2.92864	3.0356	3.81666	3.64629	44.3309	44.3309	44.3309	44.3309	44.3309	20.5875	16.3887	23.7923	23.9667	21.2016	21.1874	0.464406	0.36969	0.536699	0.540632	0.478259	0.477937
106560	Zfp148	11	-	67282313	67282320	7	67282317	8		protein_coding	XM_039088601.1	1271	0.00039253	0.00750246	0.00182237	0.00105785	0.000497258	0.00105785	0.043434	0.272916	0.104088	0.0865836	0.0519487	0.0865836	12	0.741364	0.492095	1.58329	0.621851	0.506378	0.788995	246.328	246.328	246.328	246.328	246.328	80.0921	79.0072	72.2022	79.9399	78.8002	78.0083	0.325143	0.320739	0.293114	0.324525	0.319899	0.316684
545510	Trerf1	9	+	13788091	13788102	11	13788101	6		protein_coding	XM_039083498.1	212	0.00246117	0.00332335	0.00253068	0.00117538	0.00182052	0.00246117	0.12586	0.16705	0.128752	0.0921058	0.109083	0.12586	12	9.49709	10.2414	9.8223	10.2065	9.50922	9.8553	37.3598	37.3598	37.3598	37.3598	37.3598	25.9772	21.6444	25.3828	21.9633	26.2685	24.2473	0.695324	0.579351	0.679416	0.587885	0.703123	0.64902
9280	Timm50	1	-	83574868	83574898	30	83574872	3	mPAS	protein_coding		239	0.00187042	0.00184629	0.00116305	0.00359368	0.00293339	0.00187042	0.107412	0.119172	0.0787524	0.182857	0.148337	0.119172	12	6.26315	5.29184	6.0543	4.20986	6.05572	5.57498	42.2565	42.2565	42.2565	42.2565	42.2565	15.9204	23.7496	17.9455	24.8199	17.9199	20.0711	0.376756	0.562035	0.424681	0.587364	0.424074	0.474982
285586	LOC102549789	2	+	8140762	8140784	22	8140776	6		lncRNA		134	0.00119051	0.00166557	0.00730439	0.000648068	0.000630616	0.00119051	0.0800998	0.113994	0.242896	0.0666042	0.0590751	0.0800998	12	7.16648	7.16648	8.28556	7.57513	7.97722	7.63418	24.6081	24.6081	24.6081	24.6081	24.6081	17.1107	17.2168	13.324	16.7755	15.1202	15.9095	0.695328	0.699639	0.541449	0.681707	0.614441	0.646513
406863	Tex10	5	-	62762683	62762697	14	62762688	1		protein_coding		1622	0.00431651	0.000669567	0.000475576	0.00539926	0.000594952	0.000669567	0.181011	0.0685918	0.0468607	0.233603	0.0569093	0.0685918	12	0.555329	0.590879	1.42383	0.926614	1.43799	0.986927	300.651	300.651	300.651	300.651	300.651	61.7403	62.319	61.0386	64.2545	61.7477	62.22	0.205355	0.20728	0.203021	0.213718	0.20538	0.206951
573772	Diaph2	X	+	92530379	92530379	0	92530379	3		protein_coding		129	0.000666139	0.00390252	0.00347831	0.00249209	0.000949695	0.00249209	0.0582771	0.183373	0.154946	0.145213	0.0750235	0.145213	12	8.0592	5.79547	6.04742	8.01935	8.0515	7.19459	23.9856	23.9856	23.9856	23.9856	23.9856	5.56823	15.9847	15.8809	6.66854	6.14458	10.0494	0.232149	0.666428	0.662102	0.278023	0.256178	0.418976
435355	Man1c1	5	+	146858391	146858391	0	146858391	5		protein_coding	NM_001108687.1	128	0.00044629	0.00182475	0.00142157	0.00600549	0.00181507	0.00181507	0.0461268	0.118022	0.0892189	0.250943	0.109083	0.109083	12	9.49935	10.2017	8.25586	10.3171	9.28111	9.51103	22.715	22.715	22.715	22.715	22.715	13.0635	9.54568	15.6475	8.51166	14.5211	12.2579	0.575104	0.420237	0.68886	0.374715	0.639274	0.539638
353195	Hspa12b	3	+	118364351	118364375	24	118364372	2		protein_coding		192	0.0011196	0.00285007	0.0024504	0.00363367	0.00147427	0.0024504	0.0780608	0.15263	0.125715	0.184042	0.0972463	0.125715	12	2.07301	1.31233	2.00923	3.21926	0.767673	1.8763	33.7579	33.7579	33.7579	33.7579	33.7579	15.4072	16.0318	15.9535	8.90802	15.9569	14.4515	0.456402	0.474904	0.472584	0.263879	0.472685	0.428091
412864	Uqcrh	5	-	129547366	129547384	18	129547366	4		protein_coding		19	0.00284192	0.00207816	0.00336954	0.00218799	0.00109208	0.00218799	0.139707	0.127679	0.152915	0.134061	0.0804666	0.134061	12	8.61041	10.0193	8.60548	7.58203	9.13392	8.79024	3.54739	3.54739	3.54739	3.54739	3.54739	5.20187	6.90053	5.26004	1.92459	6.61113	5.17963	1.46639	1.94524	1.48279	0.542535	1.86366	1.46012
135431	Gpr37l1	13	-	46598559	46598599	40	46598575	2	mPAS	protein_coding		13993	0.000961843	0.00316722	0.00201788	0.00294048	0.00250103	0.00250103	0.0710354	0.161741	0.111964	0.161094	0.133264	0.133264	12	8.08142	6.77378	5.05896	6.13868	6.85552	6.58167	2647.17	2647.17	2647.17	2647.17	2647.17	162.947	418.79	454.692	477.067	402.372	383.173	0.061555	0.158202	0.171765	0.180217	0.152001	0.144748
68007	Cyfip2	10	-	30623558	30623689	131	30623586	5		protein_coding		3819	0.00356284	0.00191379	0.000647844	0.00501769	0.000503999	0.00191379	0.161175	0.121796	0.0551946	0.222864	0.0523259	0.121796	12	1.36504	0.738899	0.235091	2.35974	0.233104	0.986374	698.342	698.342	698.342	698.342	698.342	96.0126	102.757	99.8867	66.274	99.8661	92.9594	0.137487	0.147145	0.143034	0.0949019	0.143004	0.133114
32488	Adgrg6	1	+	8846548	8846549	1	8846549	2		protein_coding	XM_218313.10	132	0.00146013	0.00105141	0.00341223	0.000987958	0.00474395	0.00146013	0.0903884	0.0878879	0.153705	0.0838892	0.200604	0.0903884	12	6.24118	8.25712	8.09358	7.23232	6.54458	7.27376	21.3937	21.3937	21.3937	21.3937	21.3937	14.666	8.13614	9.01554	13.8418	14.6348	12.0589	0.68553	0.380305	0.421411	0.647006	0.684071	0.563665
369408	Cntnap2	4	-	76206431	76206431	0	76206431	13		protein_coding	XM_039109025.1	87	0.00128762	0.00139521	0.00346493	0.00311375	0.00245103	0.00245103	0.0831119	0.102327	0.154943	0.167071	0.131815	0.131815	12	10.7979	11.7281	10.63	11.4932	0.345438	8.99893	17.5339	17.5339	17.5339	17.5339	17.5339	19.3175	16.8532	19.8007	17.4756	12.7474	17.2389	1.10172	0.961175	1.12928	0.996672	0.727013	0.983173
311807	Egr2	20	-	21051270	21051273	3	21051270	2	mPAS	protein_coding		80	0.00200553	0.00679508	0.000449244	0.00157971	0.000894817	0.00157971	0.112763	0.254171	0.0458735	0.110059	0.0723071	0.110059	12	2.5619	2.70067	4.00122	4.49157	2.94658	3.34039	15.0666	15.0666	15.0666	15.0666	15.0666	16.9477	16.5672	13.9783	11.5043	16.8508	15.1697	1.12486	1.0996	0.927771	0.763566	1.11843	1.00684
450660	Ppp1r13b	6	-	130890677	130890687	10	130890684	2	mPAS	protein_coding		5045	0.00197707	0.00238759	0.000482936	0.00447921	0.00247837	0.00238759	0.112318	0.138363	0.0468607	0.209207	0.132725	0.132725	12	5.89952	6.04298	4.58205	3.20286	4.36005	4.81749	956.294	956.294	956.294	956.294	956.294	79.9713	72.0056	126.745	122.181	134.114	107.003	0.0836263	0.0752965	0.132538	0.127765	0.140243	0.111894
165718	Hopx	14	+	31082898	31082913	15	31082909	1	mPAS	protein_coding	XM_039091595.1	1002	0.00238382	0.00358416	0.00275686	0.00236154	0.000881495	0.00238382	0.123496	0.173509	0.135736	0.139953	0.0716017	0.135736	12	11.6326	11.6778	10.5433	10.711	0.215408	8.95602	182.719	182.719	182.719	182.719	182.719	51.5968	50.515	70.4551	67.2763	34.2276	54.8141	0.282383	0.276463	0.385593	0.368195	0.187324	0.299992
140780	-	13	-	90088220	90088229	9	90088222				-	3312	0.00330044	0.00439694	0.00220232	0.00114051	0.000977066	0.00220232	0.15459	0.198625	0.117526	0.0903218	0.0756252	0.117526	12	9.03017	9.93342	10.0461	9.93535	10.6586	9.92073	614.758	614.758	614.758	614.758	614.758	285.431	305.895	304.438	303.868	281.076	296.142	0.464298	0.497587	0.495217	0.494289	0.457214	0.481721
144297	-	13	+	23884516	23884519	3	23884517				-	200	0.00316495	0.00312299	0.00167669	0.0022045	0.00186218	0.0022045	0.150079	0.16029	0.099156	0.134373	0.110849	0.134373	12	10.1514	9.80931	8.70079	10.6934	9.12473	9.69592	35.2874	35.2874	35.2874	35.2874	35.2874	24.316	25.3341	23.9601	20.7125	26.5325	24.171	0.689084	0.717937	0.678999	0.586965	0.751897	0.684976
429093	Nfia	5	+	112775450	112775452	2	112775451	11		protein_coding	XM_039109300.1	185	0.00101995	0.00737954	0.000842376	0.00209487	0.000712208	0.00101995	0.0736402	0.26968	0.0662162	0.130958	0.0635326	0.0736402	12	11.799	0.387825	10.6	11.4574	10.5657	8.96196	32.0351	32.0351	32.0351	32.0351	32.0351	20.9345	15.9547	24.8589	22.5289	24.622	21.7798	0.653484	0.498037	0.77599	0.703257	0.768593	0.679872
392588	-	4	+	107490978	107490978	0	107490978				-	37	0.00149613	0.00280111	0.000384638	0.00413429	0.00324383	0.00280111	0.0917231	0.151027	0.0413402	0.19923	0.159218	0.151027	12	9.99017	10.4778	10.7451	10.3058	11.8804	10.6799	6.22025	6.22025	6.22025	6.22025	6.22025	8.22643	7.55396	7.12987	7.66051	3.26984	6.76812	1.32252	1.21441	1.14624	1.23154	0.525677	1.08808
276997	Ash1l	2	-	174356251	174356251	0	174356251	6		protein_coding	XM_039102313.1	18	0.00201658	0.00119073	0.0006179	0.00449702	0.0039758	0.00201658	0.112978	0.0950104	0.0548162	0.209207	0.179091	0.112978	12	11.0016	9.52321	10.4072	0.421936	10.6372	8.39824	3.81529	3.81529	3.81529	3.81529	3.81529	6.70133	7.69367	7.74801	2.29735	7.16049	6.32017	1.75644	2.01653	2.03078	0.602143	1.87678	1.65654
407728	Ecpas	5	-	73616355	73616360	5	73616358	6		misc_RNA		57	0.00401241	0.00169464	0.000635465	0.00497748	0.00101358	0.00169464	0.173363	0.115383	0.0550075	0.222736	0.0771901	0.115383	12	6.76813	4.80564	6.0803	6.50415	6.83039	6.19772	9.93092	9.93092	9.93092	9.93092	9.93092	7.43631	8.55071	8.91481	8.09128	7.47875	8.09437	0.748804	0.861019	0.897682	0.814756	0.753077	0.815068
481625	Sox10	7	-	110725418	110725429	11	110725423	2		protein_coding		2033	0.000954509	0.00350809	0.00126084	0.00541142	0.00120779	0.00126084	0.0706582	0.172253	0.0828996	0.23381	0.0856158	0.0856158	12	4.94015	6.85199	6.87954	5.87435	5.71926	6.05306	379.118	379.118	379.118	379.118	379.118	77.3858	74.4271	74.95	87.0115	86.9821	80.1513	0.204121	0.196317	0.197696	0.22951	0.229433	0.211415
187656	Parp4	15	+	30791835	30791835	0	30791835	2		protein_coding		25	0.00349924	0.00112418	0.00227205	0.00197952	0.00348638	0.00227205	0.159205	0.0911139	0.120056	0.125447	0.16547	0.125447	12	11.227	5.08528	0.359153	11.7583	2.66654	6.21926	6.94977	6.94977	6.94977	6.94977	6.94977	0.21318	0.736184	6.54779	3.37908	11.2926	4.43377	0.0306744	0.105929	0.94216	0.486214	1.62489	0.637973
261146	Cdh13	19	+	47176621	47176624	3	47176622	5		protein_coding		161	0.00224561	0.00179702	0.00349833	0.000863546	0.00399973	0.00224561	0.120463	0.117183	0.154946	0.077908	0.17945	0.120463	12	9.13344	10.9412	9.175	10.6394	9.03469	9.78476	27.6082	27.6082	27.6082	27.6082	27.6082	17.0833	16.7627	17.8694	17.5979	17.0222	17.2671	0.618777	0.607163	0.647249	0.637417	0.616563	0.625434
378622	-	4	-	162554783	162554785	2	162554784				-	95	0.00577141	0.000926389	0.00246524	0.00271799	0.000616381	0.00246524	0.214617	0.0826385	0.126008	0.15386	0.0582572	0.126008	12	9.88913	10.4174	10.5355	9.27691	9.16264	9.8563	16.1182	16.1182	16.1182	16.1182	16.1182	15.4367	13.8449	13.1267	16.592	16.6872	15.1375	0.957717	0.858959	0.8144	1.02939	1.0353	0.939153
448055	LOC102549675	6	-	104989638	104989648	10	104989643	2		lncRNA		3149	0.00255424	0.00401285	0.00274102	0.00153722	0.00175892	0.00255424	0.129514	0.186583	0.135541	0.108243	0.107213	0.129514	12	9.8493	10.2545	9.8144	9.49193	8.86589	9.6552	598.382	598.382	598.382	598.382	598.382	119.491	120.335	126.69	126.622	118.419	122.311	0.199691	0.2011	0.21172	0.211607	0.197899	0.204403
392607	-	4	+	108218583	108218584	1	108218584				-	124	0.00289426	0.00275975	0.0046869	0.00142587	0.00104863	0.00275975	0.141405	0.150328	0.184439	0.103856	0.0788924	0.141405	12	9.88766	10.8054	9.88133	10.2765	9.49686	10.0695	20.7901	20.7901	20.7901	20.7901	20.7901	21.1372	17.9468	21.7213	20.0806	22.7623	20.7296	1.01669	0.863238	1.04479	0.965872	1.09486	0.99709
413344	Atp6v0b	5	-	131423378	131423409	31	131423388	1	mPAS	protein_coding		28578	0.0011274	0.00113223	0.000640138	0.00800577	0.00201198	0.00113223	0.0781337	0.0914916	0.0550918	0.292229	0.117337	0.0914916	12	4.36888	6.39018	4.97547	4.02668	4.47767	4.84778	5437.55	5437.55	5437.55	5437.55	5437.55	1353.58	855.705	1349.78	1266.11	1381.74	1241.38	0.248932	0.15737	0.248233	0.232845	0.254112	0.228298
496800	Syngr1	7	+	111656487	111656493	6	111656487	3		protein_coding		47	0.00479709	0.00307351	0.00313308	0.00100692	0.000978743	0.00307351	0.193948	0.159739	0.146535	0.0850448	0.0756252	0.146535	12	6.4566	7.23575	6.1199	7.82833	6.88514	6.90514	7.7535	7.7535	7.7535	7.7535	7.7535	10.0774	9.27591	9.92811	7.17042	10.0387	9.29811	1.29972	1.19635	1.28047	0.924797	1.29473	1.19921
356514	-	3	+	140762636	140762683	47	140762645				-	547	0.00254938	0.00105996	0.0010715	0.00258321	0.00576845	0.00254938	0.129514	0.0878879	0.0768119	0.148078	0.22813	0.129514	12	10.8617	9.12659	8.85055	0.10488	9.7383	7.7364	95.5574	95.5574	95.5574	95.5574	95.5574	29.6933	35.3027	33.5227	11.4033	36.483	29.281	0.310738	0.36944	0.350812	0.119335	0.381791	0.306423
164277	Hnrnpd	14	+	9638974	9638983	9	9638976	5	mPAS	protein_coding		611	0.00051189	0.00818089	0.00113642	0.00208922	0.00112231	0.00113642	0.0501454	0.288027	0.0782797	0.130862	0.0816072	0.0816072	12	6.44032	4.42251	6.24519	4.72302	5.3808	5.44237	111.441	111.441	111.441	111.441	111.441	24.6289	33.8724	26.7773	35.3229	34.3032	30.9809	0.221003	0.303948	0.240282	0.316964	0.307814	0.278002
468043	Pacs2	6	+	132156685	132156716	31	132156698	3	mPAS	protein_coding		5337	0.00107481	0.000683305	0.00372628	0.00297363	0.00465183	0.00297363	0.0758509	0.0691074	0.160346	0.161589	0.198293	0.160346	12	3.32211	5.9541	4.83308	3.55225	4.92741	4.51779	967.325	967.325	967.325	967.325	967.325	237.342	115.595	223.688	261.514	215.877	210.803	0.245359	0.1195	0.231244	0.270348	0.223169	0.217924
111554	Mrps6	11	+	31348468	31348492	24	31348482	2	mPAS	protein_coding	XM_039088783.1	4797	0.00681394	0.00255377	0.00169475	0.000500588	0.00158578	0.00169475	0.23727	0.14405	0.0996669	0.0580189	0.100584	0.100584	12	3.53203	2.88799	4.35784	2.39026	3.11516	3.25666	906.912	906.912	906.912	906.912	906.912	147.15	149.497	105.032	154.945	154.452	142.215	0.162253	0.164842	0.115813	0.170848	0.170306	0.156812
49704	-	1	+	153916641	153916642	1	153916642				-	79	0.00649489	0.000915456	0.00214288	0.00202415	0.00168566	0.00202415	0.231231	0.0823573	0.116178	0.127795	0.10418	0.116178	12	8.28603	8.58169	8.43532	6.58643	6.58661	7.69521	14.6404	14.6404	14.6404	14.6404	14.6404	11.7502	10.206	10.6688	12.6797	12.6318	11.5873	0.802588	0.697116	0.728723	0.866079	0.862807	0.791463
336503	Ahcy	3	-	143569126	143569137	11	143569133	1	mPAS	protein_coding		3184	0.00211004	0.00146994	0.00351463	0.00557392	0.000774841	0.00211004	0.11595	0.104199	0.15511	0.237918	0.0672312	0.11595	12	10.4684	10.5314	11.2315	10.1257	11.3823	10.7479	600.383	600.383	600.383	600.383	600.383	92.2186	92.9589	83.3704	93.7035	79.6997	88.3902	0.1536	0.154833	0.138862	0.156073	0.132748	0.147223
328910	-	3	-	71831160	71831163	3	71831163				-	67	0.000535232	0.00660415	0.000624352	0.0046945	0.00105084	0.00105084	0.0508903	0.249399	0.0548162	0.215379	0.0788924	0.0788924	12	3.64374	2.72825	3.01899	4.68977	3.54345	3.52484	13.8722	13.8722	13.8722	13.8722	13.8722	14.9964	14.0615	15.2178	10.921	15.1501	14.0694	1.08104	1.01365	1.097	0.787259	1.09211	1.01421
537535	-	9	-	50343509	50343517	8	50343514				-	249	0.00156133	0.00444283	0.00547516	0.000388418	0.00164539	0.00164539	0.0946243	0.199563	0.2036	0.0485629	0.103471	0.103471	12	9.88461	10.8129	9.26285	9.08576	10.837	9.97662	41.955	41.955	41.955	41.955	41.955	29.8038	24.9137	29.6224	28.5334	24.878	27.5503	0.710376	0.59382	0.706052	0.680096	0.592969	0.656663
204028	Ncoa4	16	+	7409538	7409567	29	7409559	3	mPAS	protein_coding		2644	0.000912821	0.000915351	0.00179488	0.00664449	0.00325393	0.00179488	0.0698517	0.0823573	0.103448	0.263104	0.159434	0.103448	12	6.52332	6.48236	6.51274	5.52033	6.01527	6.2108	489.522	489.522	489.522	489.522	489.522	72.8066	74.0965	72.3066	97.2472	88.2996	80.9513	0.14873	0.151365	0.147708	0.198657	0.180379	0.165368
391696	Tnip3	4	+	94898460	94898483	23	94898483	1		protein_coding		393	0.00163512	0.00433422	0.00172469	0.0043116	0.00155083	0.00172469	0.0977902	0.196913	0.100867	0.203452	0.100101	0.100867	12	11.7773	11.3311	0.386739	11.8112	11.7854	9.41835	76.8096	76.8096	76.8096	76.8096	76.8096	33.5057	31.9366	32.3367	33.5435	33.4763	32.9598	0.436218	0.415789	0.420998	0.436709	0.435834	0.42911
34552	Rnf217	1	+	26108734	26108737	3	26108734	3	mPAS	protein_coding	NM_001106204.1	237	0.00199759	0.00490921	0.000483998	0.00572452	0.000685421	0.00199759	0.112763	0.211249	0.0468607	0.242391	0.0618248	0.112763	12	4.64388	6.39623	4.94467	6.65858	4.66615	5.4619	43.6135	43.6135	43.6135	43.6135	43.6135	22.0034	19.1923	22.2996	17.2633	21.3057	20.4129	0.504509	0.440054	0.511301	0.395826	0.488511	0.46804
234934	Spry4	18	-	30436491	30436513	22	30436494	1	mPAS	protein_coding		52	0.003243	0.00164374	0.00163952	0.00391212	0.00338918	0.003243	0.152616	0.112988	0.09732	0.192163	0.162472	0.152616	12	2.34023	2.30159	1.94381	2.61037	2.2337	2.28594	9.42865	9.42865	9.42865	9.42865	9.42865	13.1215	12.9409	13.2475	12.7225	13.3079	13.0681	1.39166	1.37251	1.40503	1.34934	1.41144	1.38599
29689	-	1	-	242455251	242455283	32	242455270				-	147	0.00105717	0.0062859	0.00498118	0.000409438	0.00112875	0.00112875	0.0751065	0.242553	0.191742	0.0507911	0.0818393	0.0818393	12	10.6769	8.76018	8.89101	10.1653	9.71432	9.64155	26.7525	26.7525	26.7525	26.7525	26.7525	19.8579	22.5326	23.3177	23.9813	25.4171	23.0213	0.742284	0.842264	0.871611	0.896413	0.950086	0.860531
521063	C1qtnf5	8	+	44453073	44453080	7	44453075	1	mPAS	protein_coding	XM_017595622.2	1390	0.00172607	0.00351796	0.0011536	0.00333191	0.00432963	0.00333191	0.101358	0.172407	0.0782797	0.174032	0.188868	0.172407	12	3.94833	4.67973	3.06015	3.7667	3.325	3.75598	251.373	251.373	251.373	251.373	251.373	96.7868	88.4734	92.1058	94.329	92.5408	92.8472	0.385033	0.351961	0.366411	0.375256	0.368142	0.369361
88628	Myh10	10	+	53525164	53525176	12	53525166	3	mPAS	protein_coding		2536	0.00233044	0.00142896	0.00137286	0.00757852	0.00138395	0.00142896	0.122733	0.102901	0.0868484	0.28469	0.0954989	0.102901	12	11.2465	11.1291	11.7783	11.0805	11.3639	11.3197	477.61	477.61	477.61	477.61	477.61	99.8134	97.3494	93.9053	97.2755	99.0484	97.4784	0.208985	0.203826	0.196615	0.203672	0.207384	0.204096
455588	-	6	+	35154523	35154534	11	35154524				-	397	0.0022665	0.00265799	0.00114263	0.00688728	0.00117823	0.0022665	0.12097	0.147648	0.0782797	0.270654	0.0840833	0.12097	12	9.29191	10.1673	10.13	9.39163	8.01862	9.3999	72.9266	72.9266	72.9266	72.9266	72.9266	22.552	14.2016	15.1881	22.4028	26.064	20.0817	0.309243	0.194738	0.208265	0.307196	0.3574	0.275368
51161	-	1	+	165993863	165993864	1	165993864				-	97	0.00228498	0.00058469	0.00206703	0.0055454	0.00371272	0.00228498	0.121345	0.0621004	0.113765	0.237501	0.171478	0.121345	12	8.50461	10.5228	10.4071	9.68647	8.50259	9.5247	16.4804	16.4804	16.4804	16.4804	16.4804	11.7062	9.19574	9.46723	10.9655	11.824	10.6317	0.710311	0.557982	0.574455	0.665369	0.717458	0.645115
460084	-	6	+	76738275	76738282	7	76738281				-	61	0.00222912	0.00540782	0.00157469	0.00291632	0.00212161	0.00222912	0.11978	0.223547	0.0947108	0.160772	0.120432	0.120432	12	9.35066	9.09441	9.67563	10.7444	9.68858	9.71074	10.3236	10.3236	10.3236	10.3236	10.3236	12.9287	12.1509	12.6931	9.84756	12.7545	12.0749	1.25235	1.177	1.22952	0.953887	1.23547	1.16964
165099	RGD1561381	14	+	19526114	19526127	13	19526126	1	mPAS	protein_coding	XM_039092682.1	288	0.00221715	0.00506816	0.00202373	0.000992717	0.00406349	0.00221715	0.11974	0.214775	0.111964	0.0840686	0.181497	0.11974	12	4.95489	6.68953	4.6305	6.2354	6.64201	5.83047	60.4997	60.4997	60.4997	60.4997	60.4997	45.7549	35.3774	44.237	41.7003	35.5643	40.5268	0.756282	0.584752	0.731193	0.689264	0.587842	0.669867
278562	Ttf2	2	-	188366320	188366345	25	188366345	1	mPAS	protein_coding		94	0.000672829	0.00196202	0.000480266	0.00502473	0.00628837	0.00196202	0.0583799	0.123389	0.0468607	0.222864	0.240986	0.123389	12	7.4401	7.84856	7.39979	6.67338	6.69347	7.21106	16.7731	16.7731	16.7731	16.7731	16.7731	13.4041	13.0603	13.3762	12.2691	12.2417	12.8703	0.799144	0.778645	0.797479	0.731473	0.729841	0.767316
256387	Bbs2	19	+	10944975	10945003	28	10944993	2	mPAS	protein_coding		1110	0.00121709	0.00189865	0.00470408	0.00453218	0.00212369	0.00212369	0.0806114	0.121319	0.184885	0.209762	0.120432	0.121319	12	10.2293	8.54679	9.40026	8.80703	10.3714	9.47096	200.089	200.089	200.089	200.089	200.089	29.6265	42.7795	39.4231	42.0722	26.4423	36.0687	0.148067	0.213802	0.197028	0.210267	0.132153	0.180263
125167	Slc7a1	12	+	6703847	6703857	10	6703849	2	mPAS	protein_coding		518	0.00267623	0.00156838	0.00293958	0.00463908	0.00266704	0.00267623	0.133338	0.109093	0.141015	0.214133	0.138616	0.138616	12	5.3307	6.08747	5.06913	4.80162	4.96633	5.25105	86.7844	86.7844	86.7844	86.7844	86.7844	66.3493	53.1352	69.1557	69.1652	69.2522	65.4115	0.76453	0.612267	0.796868	0.796977	0.79798	0.753724
204846	Smim7	16	+	17278320	17278340	20	17278324	1	mPAS	protein_coding		3022	0.00212132	0.00632494	0.000936945	0.00198301	0.00334086	0.00212132	0.11595	0.242879	0.0701758	0.125447	0.16124	0.125447	12	4.5295	2.7502	3.43174	2.75941	4.62219	3.61861	579.233	579.233	579.233	579.233	579.233	181.41	197.103	217.601	196.154	170.567	192.567	0.313191	0.340283	0.37567	0.338644	0.294471	0.332452
160484	Pold2	14	-	80748968	80748974	6	80748972	1	mPAS	protein_coding	NM_001013050.1	771	0.00346663	0.00314069	0.00279859	0.00128523	0.00407523	0.00314069	0.158403	0.160869	0.136941	0.0972722	0.181766	0.158403	12	4.24417	2.96219	3.53625	2.94274	3.88754	3.51458	149.593	149.593	149.593	149.593	149.593	72.7092	70.4162	75.047	68.7252	73.3524	72.05	0.486047	0.470718	0.501674	0.459414	0.490346	0.48164
78148	Lrrc37a	10	-	88396476	88396480	4	88396479	2		protein_coding		130	0.00218742	0.00381569	0.00194319	0.00159678	0.00523501	0.00218742	0.118543	0.1814	0.109221	0.110059	0.215069	0.118543	12	10.4603	0.508243	0.0758906	10.5769	0.176273	4.35951	23.4036	23.4036	23.4036	23.4036	23.4036	17.2962	12.0866	14.7047	17.4266	14.1126	15.1253	0.739038	0.51644	0.628308	0.744609	0.603011	0.646281
305898	H2az1	2	+	226357872	226357897	25	226357878	2	mPAS	protein_coding		2391	0.000409472	0.00257282	0.00153359	0.00660469	0.00373823	0.00257282	0.0442299	0.144355	0.0934668	0.262838	0.172031	0.144355	12	6.49339	6.40643	6.71159	4.70153	5.67957	5.9985	453.414	453.414	453.414	453.414	453.414	106.425	110.172	97.8967	118.128	125.851	111.695	0.234719	0.242983	0.21591	0.26053	0.277564	0.246341
25257	Scyl1	1	-	203045840	203045890	50	203045871	2		protein_coding		5333	0.00835687	0.00174037	0.00122509	0.00154868	0.00206379	0.00174037	0.265921	0.116668	0.0812216	0.108809	0.119163	0.116668	12	3.6627	3.45966	2.63877	3.32521	3.55138	3.32754	1023.19	1023.19	1023.19	1023.19	1023.19	135.535	141.733	126.161	139.438	137.405	136.054	0.132463	0.138521	0.123301	0.136278	0.134291	0.132971
125316	-	12	+	7963009	7963020	11	7963014				-	9882	0.00229357	0.00122562	0.00527841	0.00311764	0.00303955	0.00303955	0.121598	0.0951249	0.197906	0.167071	0.152011	0.152011	12	9.31343	8.79399	9.99046	10.2223	9.49182	9.5624	1689.76	1689.76	1689.76	1689.76	1689.76	879.624	842.51	881.481	840.079	940.931	876.925	0.520561	0.498597	0.52166	0.497158	0.556843	0.518964
549402	-	9	+	54174250	54174250	0	54174250				-	124	0.00134573	0.00274585	0.00119706	0.0069598	0.00274278	0.00274278	0.0852487	0.150086	0.0803481	0.271193	0.141171	0.141171	12	4.75604	4.25175	6.1871	6.2667	4.00666	5.09365	24.9743	24.9743	24.9743	24.9743	24.9743	23.1024	22.5016	12.4866	11.8917	23.7181	18.7401	0.925048	0.90099	0.499981	0.47616	0.949704	0.750376
158927	Jakmip1	14	-	73647362	73647367	5	73647365	2	mPAS	protein_coding	XM_017599199.2	152	0.00578573	0.000806744	0.00266273	0.00429895	0.00145266	0.00266273	0.214677	0.0751313	0.13254	0.203159	0.0964	0.13254	12	6.01194	4.79782	5.66633	6.57926	4.66064	5.5432	31.2899	31.2899	31.2899	31.2899	31.2899	17.6624	18.3962	18.6572	14.8482	17.8269	17.4782	0.564477	0.587927	0.596271	0.474537	0.569733	0.558589
461476	Mnat1	6	+	91970668	91970696	28	91970668	3		protein_coding	XM_017594052.2	346	0.00162039	0.00388516	0.000379456	0.00633581	0.00301329	0.00301329	0.0970919	0.183373	0.0411276	0.25794	0.151413	0.151413	12	6.40665	4.93137	4.73294	4.99147	4.45103	5.10269	64.1288	64.1288	64.1288	64.1288	64.1288	20.3622	31.8499	32.6401	32.8815	32.4737	30.0415	0.31752	0.496655	0.508977	0.512741	0.506382	0.468455
453783	Dpy30	6	+	21143067	21143095	28	21143071	2		protein_coding		92	0.00625741	0.000865002	0.00365561	0.00179061	0.00268156	0.00268156	0.225302	0.0789364	0.159029	0.117482	0.138694	0.138694	12	6.21893	5.85806	5.17863	5.51536	5.91043	5.73628	17.3222	17.3222	17.3222	17.3222	17.3222	8.94035	11.162	14.0953	12.8993	10.7996	11.5793	0.516121	0.644375	0.813714	0.744669	0.623453	0.668466
544520	Ranbp3	9	+	1544455	1544468	13	1544458	1	mPAS	protein_coding		351	0.000819887	0.00163792	0.00112703	0.00797269	0.00370451	0.00163792	0.0660841	0.112988	0.0782797	0.292028	0.171478	0.112988	12	6.57758	6.59202	5.12123	4.77652	6.56096	5.92566	65.839	65.839	65.839	65.839	65.839	24.6028	24.4583	34.3898	33.2904	24.3421	28.2167	0.373682	0.371487	0.522332	0.505634	0.369721	0.428571
242112	Wdr33	18	+	23535438	23535490	52	23535459	6	mPAS	protein_coding		797	0.00190703	0.0026666	0.00383711	0.00530233	0.00167502	0.0026666	0.108924	0.147648	0.162474	0.2313	0.10395	0.147648	12	6.8081	4.98024	6.62768	7.82454	4.9285	6.23381	148.936	148.936	148.936	148.936	148.936	48.7929	56.7846	51.9613	25.0519	55.7776	47.6736	0.32761	0.381269	0.348884	0.168206	0.374508	0.320096
39923	Xrcc1	1	+	80168699	80168724	25	80168700	2	mPAS	protein_coding		1035	0.00158798	0.00643344	0.00310588	0.000793188	0.00356338	0.00310588	0.0958165	0.244679	0.145907	0.074968	0.167153	0.145907	12	3.1213	4.0541	3.01061	3.03129	4.26738	3.49694	189.401	189.401	189.401	189.401	189.401	98.8854	94.672	98.9662	97.9461	91.8029	96.4545	0.522095	0.499849	0.522521	0.517136	0.4847	0.50926
511537	Sh3bgrl2	8	-	84503241	84503241	0	84503241	3		protein_coding	XM_039081966.1	101	0.00174525	0.00395793	0.00301489	0.00297484	0.00384591	0.00301489	0.102258	0.184841	0.143065	0.161589	0.174478	0.161589	12	11.2648	10.4776	11.1555	0.270135	0.25754	6.68512	18.896	18.896	18.896	18.896	18.896	10.8934	10.8302	11.2146	8.51063	8.52861	9.99549	0.576492	0.57315	0.593491	0.450394	0.451345	0.528974
270621	Hnf4g	2	-	97984230	97984231	1	97984231	1		protein_coding		77	0.00075715	0.00692629	0.000899161	0.00555668	0.00142074	0.00142074	0.0631097	0.258167	0.068641	0.237501	0.0960546	0.0960546	12	9.48593	8.35946	9.20591	9.21152	9.92161	9.23689	12.8279	12.8279	12.8279	12.8279	12.8279	12.4341	12.192	12.8063	12.5948	10.6166	12.1287	0.969299	0.950429	0.998314	0.981832	0.827618	0.945499
201737	Kbtbd11	16	-	74616300	74616328	28	74616314	2		protein_coding	XM_006253390.4	3034	0.00131568	0.00672691	0.00231609	0.00409399	0.00111339	0.00231609	0.0838996	0.251918	0.121775	0.19819	0.0815188	0.121775	12	10.3235	9.72728	8.6887	10.1511	10.5834	9.8948	559.265	559.265	559.265	559.265	559.265	90.8915	103.012	110.608	97.0562	83.3335	96.9804	0.16252	0.184192	0.197775	0.173542	0.149005	0.173407
232102	Osbpl1a	18	-	3904899	3904919	20	3904915	3		protein_coding	XM_039096596.1	1183	0.00292917	0.00284823	0.00215414	0.00231745	0.00542232	0.00284823	0.142206	0.15263	0.116342	0.138614	0.219979	0.142206	12	11.0095	10.5081	10.6372	11.0187	11.0714	10.849	213.662	213.662	213.662	213.662	213.662	46.9768	46.0151	46.3763	47.4453	47.4765	46.858	0.219865	0.215363	0.217054	0.222058	0.222203	0.219309
202363	Arhgef7	16	-	77671021	77671030	9	77671025	2	mPAS	protein_coding		3093	0.00051086	0.00405478	0.00210813	0.00452538	0.0044818	0.00405478	0.0501454	0.187708	0.115229	0.209762	0.193119	0.187708	12	5.57423	6.25914	6.13003	6.26997	6.01864	6.0504	596.75	596.75	596.75	596.75	596.75	125.983	83.5036	92.655	83.2635	100.559	97.1928	0.211114	0.139931	0.155266	0.139528	0.168512	0.16287
234808	Hdac3	18	-	29770683	29770686	3	29770684	3	mPAS	protein_coding		287	0.00321594	0.00908808	0.000683174	0.00118951	0.00162605	0.00162605	0.152203	0.306018	0.0569437	0.0925863	0.102457	0.102457	12	0.208019	11.4996	10.907	0.212776	10.1962	6.60471	51.5276	51.5276	51.5276	51.5276	51.5276	19.6341	31.759	38.733	19.6204	41.8864	30.3266	0.381041	0.61635	0.751696	0.380775	0.812894	0.588551
424549	Nudt2	5	+	56642968	56642988	20	56642984	2		protein_coding		2316	0.00105395	0.00279349	0.0030661	0.00509316	0.00381464	0.0030661	0.0751065	0.151027	0.144252	0.225269	0.174223	0.151027	12	6.47901	6.21805	5.30417	5.01391	5.3965	5.68233	446.706	446.706	446.706	446.706	446.706	126.84	136.235	152.949	150.469	152.559	143.81	0.283944	0.304977	0.342394	0.33684	0.341521	0.321935
355272	-	3	+	131185347	131185357	10	131185349				-	3477	0.00395122	0.00188432	0.00093352	0.00682482	0.00224523	0.00224523	0.171982	0.120989	0.0701055	0.268903	0.125311	0.125311	12	10.771	10.8379	9.75379	10.5328	9.9278	10.3646	653.414	653.414	653.414	653.414	653.414	134.608	132.893	162.836	141.196	158.415	145.989	0.206007	0.203382	0.249207	0.21609	0.242442	0.223426
138115	Dnm3	13	-	74363608	74363620	12	74363612	5		protein_coding	XM_017598662.2	917	0.00293415	0.0061768	0.00265907	0.00149047	0.0026498	0.00265907	0.142206	0.2398	0.13254	0.106846	0.138486	0.138486	12	5.49655	4.30409	6.31212	6.44588	4.56354	5.42444	183.391	183.391	183.391	183.391	183.391	75.4941	80.328	53.8615	51.0444	83.2627	68.7981	0.411657	0.438015	0.293698	0.278336	0.454017	0.375144
256080	Got2	19	+	9199988	9200002	14	9199993	3	mPAS	protein_coding	NM_013177.2	24780	0.000620151	0.000635993	0.000902328	0.0115177	0.00235846	0.000902328	0.055764	0.0661782	0.0687176	0.353057	0.129699	0.0687176	12	6.21263	6.07992	4.97049	4.25352	5.28996	5.3613	4769.94	4769.94	4769.94	4769.94	4769.94	1088.14	1168.94	1584.6	1575.04	1537.07	1390.76	0.228124	0.245064	0.332205	0.330202	0.322241	0.291567
379608	Slco1a4	4	-	174711111	174711117	6	174711115	2		protein_coding	XM_039106958.1	127	0.00507805	0.00176991	0.00231068	0.0014979	0.00539191	0.00231068	0.200328	0.116668	0.121692	0.107137	0.219527	0.121692	12	6.79564	5.62302	6.95027	6.88076	7.53756	6.75745	22.2416	22.2416	22.2416	22.2416	22.2416	17.3618	15.7042	16.8815	17.4699	14.0715	16.2978	0.780603	0.706076	0.759005	0.785463	0.632665	0.732762
220944	Mindy3	17	-	75545280	75545293	13	75545286	2	mPAS	protein_coding	XM_017600495.2	2820	0.00364058	0.00301157	0.00154735	0.00107129	0.00680603	0.00301157	0.163991	0.157562	0.0938155	0.0871085	0.252204	0.157562	12	5.5247	4.95992	4.49708	4.90698	6.51918	5.28157	515.738	515.738	515.738	515.738	515.738	71.0724	69.6581	69.9716	73.9773	52.8804	67.512	0.137807	0.135065	0.135673	0.14344	0.102534	0.130904
417343	Srarp	5	-	153740970	153740984	14	153740973	1	mPAS	protein_coding		562	0.00105611	0.00586635	0.000692137	0.00429899	0.00445603	0.00429899	0.0751065	0.234337	0.0572401	0.203159	0.192689	0.192689	12	0.364371	2.02079	0.219574	0.161957	1.12667	0.778673	102.936	102.936	102.936	102.936	102.936	37.1963	23.9539	36.932	36.5926	34.9517	33.9253	0.361352	0.232706	0.358785	0.355487	0.339546	0.329575
431870	Agbl4	5	+	126417601	126417602	1	126417601	6		protein_coding		260	0.00189831	0.00255876	0.00487306	0.00420416	0.0028847	0.0028847	0.108817	0.144076	0.188724	0.201196	0.14681	0.14681	12	10.6072	11.2877	10.6028	0.0691036	9.39952	8.39326	42.5899	42.5899	42.5899	42.5899	42.5899	28.7177	23.3647	29.038	13.1484	31.5142	25.1566	0.674285	0.548597	0.681805	0.308721	0.739946	0.59067
77921	Ccdc43	10	-	87650550	87650558	8	87650553	1	mPAS	protein_coding	NM_001100728.1	622	0.00120496	0.0015708	0.00697036	0.00130635	0.00537616	0.0015708	0.0803907	0.109093	0.236173	0.0983073	0.219167	0.109093	12	5.96626	4.79287	6.71812	6.2695	6.66164	6.08168	114.273	114.273	114.273	114.273	114.273	33.7523	32.4524	27.3237	31.9358	27.3857	30.57	0.295365	0.28399	0.239108	0.279469	0.239651	0.267517
223839	Nfil3	17	+	12295728	12295728	0	12295728	1	mPAS	protein_coding		76	0.00117533	0.0104368	0.00172159	0.00141181	0.00179675	0.00172159	0.0799135	0.337172	0.100867	0.103306	0.108892	0.103306	12	4.7301	6.03647	5.86636	5.02225	5.54186	5.43941	14.3349	14.3349	14.3349	14.3349	14.3349	10.2962	10.5502	10.827	11.1214	11.0691	10.7728	0.718261	0.735977	0.755291	0.775828	0.772176	0.751507
130760	Gatc	12	+	41276817	41276824	7	41276824	4		protein_coding		343	0.00260902	0.00732918	0.00116974	0.00161153	0.00383323	0.00260902	0.131515	0.268637	0.0789388	0.110059	0.174401	0.131515	12	2.49904	0.622906	1.62562	0.725869	0.878285	1.27034	67.7285	67.7285	67.7285	67.7285	67.7285	11.7182	17.3416	15.7541	17.3509	17.2069	15.8743	0.173017	0.256046	0.232606	0.256183	0.254057	0.234382
504357	Ntm	8	-	28366291	28366379	88	28366326	7		protein_coding	XM_017595865.2	1759	0.00143264	0.00291934	0.00197966	0.0061479	0.00420659	0.00291934	0.0890342	0.155553	0.110362	0.253228	0.185284	0.155553	12	11.2711	11.9477	0.260558	11.4384	0.310159	7.04558	349.768	349.768	349.768	349.768	349.768	157.293	141.66	128.169	155.374	125.714	141.642	0.449707	0.405012	0.36644	0.444219	0.359419	0.404959
139221	Rgs4	13	-	81937557	81937587	30	81937584	5		protein_coding		2346	0.00733685	0.00188587	0.00217487	0.0013506	0.00393833	0.00217487	0.246557	0.120989	0.117063	0.0995195	0.177908	0.120989	12	2.18376	2.92871	4.26494	4.10901	3.87784	3.47285	456.252	456.252	456.252	456.252	456.252	142.595	136.012	80.6238	96.4205	103.308	111.792	0.312536	0.298108	0.176709	0.211332	0.226428	0.245022
26471	Dtx4	1	-	209457710	209457735	25	209457727	3	mPAS	protein_coding	XM_039108701.1	2205	0.00384328	0.00235652	0.00393509	0.00384148	0.00272312	0.00384148	0.169318	0.136811	0.164695	0.190022	0.140615	0.164695	12	4.6623	3.03177	3.28849	3.27565	3.21634	3.49491	419.99	419.99	419.99	419.99	419.99	49.5992	68.3223	67.3734	65.9687	64.6934	63.1914	0.118096	0.162676	0.160417	0.157072	0.154035	0.150459
258966	Cdh3	19	+	34444081	34444084	3	34444084	1	mPAS	protein_coding		29	0.00287905	0.00395207	0.00272159	0.00288079	0.00430592	0.00288079	0.140878	0.184839	0.134835	0.159382	0.188868	0.159382	12	10.8377	7.3042	0.604098	0.101194	10.0496	5.77936	4.68067	4.68067	4.68067	4.68067	4.68067	7.35653	0.0465555	2.49802	4.36629	7.73	4.39948	1.57168	0.00994634	0.533688	0.932834	1.65147	0.939925
390670	Snca	4	+	89750703	89750706	3	89750706	4		protein_coding	XM_039107198.1	127	0.00243909	0.00419277	0.00518572	0.00410329	0.000829755	0.00410329	0.125629	0.192135	0.196228	0.198338	0.0702681	0.192135	12	10.0028	8.97111	10.9637	10.4135	10.8394	10.2381	22.5988	22.5988	22.5988	22.5988	22.5988	19.9103	18.5407	17.765	19.537	18.6978	18.8902	0.881031	0.820428	0.786102	0.864516	0.827381	0.835892
8588	Pou2f2	1	-	80683110	80683114	4	80683113	6		protein_coding		54	0.00410721	0.0023987	0.00474209	0.00181437	0.00369436	0.00369436	0.17626	0.138753	0.18569	0.117964	0.171478	0.171478	12	1.03081	1.80608	1.5342	0.11542	2.41195	1.37969	10.4578	10.4578	10.4578	10.4578	10.4578	11.0492	11.9112	11.7152	7.77172	11.6359	10.8167	1.05656	1.13898	1.12024	0.743152	1.11266	1.03432
309984	Cstb	20	-	10245452	10245498	46	10245462	1	mPAS	protein_coding		3905	0.00164425	0.00103931	0.000524224	0.0111413	0.00243952	0.00164425	0.0981511	0.0878879	0.0498436	0.346719	0.131755	0.0981511	12	11.1984	10.4539	10.8545	11.0629	0.0576087	8.72547	750.3	750.3	750.3	750.3	750.3	195.247	218.084	210.611	197.742	137.656	191.868	0.260225	0.290663	0.280702	0.263551	0.183468	0.255722
94424	Thra	10	+	83725531	83725578	47	83725547	10		protein_coding		283	0.00609923	0.00392117	0.000752651	0.00365976	0.00254501	0.00365976	0.222636	0.183936	0.0606648	0.184481	0.134928	0.183936	12	3.34368	2.22755	3.15476	2.20951	3.35933	2.85896	50.797	50.797	50.797	50.797	50.797	20.798	21.2198	21.214	21.5225	20.7891	21.1087	0.409433	0.417737	0.417624	0.423696	0.409259	0.41555
244314	Prelid2	18	+	33881345	33881349	4	33881348	3		protein_coding	XM_039097122.1	221	0.0051791	0.0018159	0.00244425	0.00479056	0.00291977	0.00291977	0.202552	0.11793	0.125602	0.21827	0.147884	0.147884	12	9.89051	10.5934	9.01654	10.9612	8.90542	9.87342	37.1975	37.1975	37.1975	37.1975	37.1975	28.1796	25.3236	27.2996	22.2199	27.2689	26.0583	0.757565	0.680787	0.733909	0.597348	0.733083	0.700539
549399	-	9	+	54034975	54034975	0	54034975				-	50	0.00262391	0.00423081	0.00352157	0.00265904	0.00431376	0.00352157	0.131656	0.193321	0.15511	0.151061	0.188868	0.15511	12	0.518403	0.236287	0.504531	11.2874	0.480176	2.60536	10.6748	10.6748	10.6748	10.6748	10.6748	9.78285	10.3921	9.75622	10.384	9.84906	10.0329	0.916441	0.973517	0.913947	0.97276	0.922643	0.939861
539322	Creb1	9	-	65908120	65908139	19	65908120	4		protein_coding	XM_039084248.1	120	0.00328182	0.00493578	0.00397065	0.000777691	0.00455018	0.00397065	0.153945	0.211532	0.165916	0.0742721	0.195142	0.165916	12	9.12572	10.705	9.73859	10.6993	11.0425	10.2622	22.3288	22.3288	22.3288	22.3288	22.3288	19.039	21.5719	22.188	20.6583	20.153	20.722	0.852665	0.966103	0.993696	0.925185	0.902556	0.928041
506050	Trappc4	8	-	44730029	44730041	12	44730035	1		protein_coding		1109	0.00668099	0.00223729	0.00286264	0.00405933	0.00172113	0.00286264	0.23444	0.132555	0.139021	0.196812	0.10571	0.139021	12	6.7523	5.73083	6.74385	6.45056	6.64188	6.46388	198.44	198.44	198.44	198.44	198.44	57.0428	71.1385	56.7174	62.4022	59.9768	61.4555	0.287457	0.358489	0.285816	0.314464	0.302241	0.309693
454216	LOC100910821	6	+	25080134	25080144	10	25080140	2		protein_coding		133	0.00155221	0.00478122	0.00371065	0.00364415	0.00392145	0.00371065	0.0942979	0.208568	0.15989	0.184279	0.177398	0.177398	12	6.63073	6.88274	6.69711	6.91921	6.89734	6.80543	24.38	24.38	24.38	24.38	24.38	20.5819	19.1209	19.8596	18.8062	18.9643	19.4666	0.844212	0.784285	0.814584	0.771377	0.77786	0.798464
563787	Rab9b	X	-	100220981	100220986	5	100220985	2		protein_coding		275	0.00553439	0.00122584	0.00352093	0.00357442	0.00384366	0.00357442	0.208984	0.0951249	0.15511	0.182576	0.174478	0.174478	12	5.39559	4.57037	4.81198	5.73571	4.71224	5.04518	50.5765	50.5765	50.5765	50.5765	50.5765	31.5504	29.9497	32.4515	29.8071	31.6955	31.0908	0.623815	0.592166	0.641633	0.589348	0.626685	0.614729
227815	LOC120097728	17	+	52192751	52192804	53	52192802	2		protein_coding		600	0.00180854	0.002237	0.00185412	0.00938248	0.0024388	0.002237	0.104806	0.132555	0.105712	0.315635	0.131755	0.131755	12	2.90373	1.19106	4.10471	1.19055	2.28202	2.33441	105.902	105.902	105.902	105.902	105.902	36.4338	39.2616	17.6375	39.1956	42.3158	34.9689	0.344035	0.370736	0.166546	0.370113	0.399577	0.330202
398571	Phb2	4	+	157522245	157522275	30	157522266	1	mPAS	protein_coding	NM_001013035.1	8520	0.000602752	0.0106238	0.00111065	0.000739819	0.00470363	0.00111065	0.0549644	0.339666	0.0780105	0.072806	0.199697	0.0780105	12	11.046	0.302856	0.133788	10.745	10.935	6.63251	1525.78	1525.78	1525.78	1525.78	1525.78	366.87	298.718	316.031	353.121	375.594	342.067	0.240448	0.195781	0.207128	0.231436	0.246166	0.224192
40662	Sars2	1	+	84040720	84040730	10	84040720	1	mPAS	protein_coding	NM_001106240.1	589	0.0050169	0.00424404	0.00300525	0.00102502	0.00452561	0.00424404	0.199177	0.193647	0.143065	0.0858879	0.194479	0.193647	12	6.32476	8.16253	6.05914	6.48065	6.44884	6.69519	110.649	110.649	110.649	110.649	110.649	43.4778	24.3935	42.8963	43.3438	43.1583	39.4539	0.392936	0.220459	0.387681	0.391725	0.390048	0.35657
437431	Dnajc11	5	+	162487303	162487324	21	162487305	1		protein_coding		885	0.00339589	0.00275374	0.00122046	0.00998981	0.000461685	0.00275374	0.156841	0.150259	0.0812138	0.32799	0.0498699	0.150259	12	4.29234	3.01485	3.14562	3.1842	3.96378	3.52016	171.864	171.864	171.864	171.864	171.864	56.7208	66.7383	65.1422	65.1471	62.3943	63.2285	0.330032	0.38832	0.379033	0.379061	0.363044	0.367898
130410	Fbxw8	12	+	38447473	38447495	22	38447481	5		protein_coding		150	0.00415104	0.000733454	0.00324626	0.00252218	0.00739525	0.00324626	0.177443	0.07216	0.149429	0.145896	0.268708	0.149429	12	0.116141	10.272	10.8881	10.4056	10.236	8.38356	29.6825	29.6825	29.6825	29.6825	29.6825	14.0305	19.1476	19.7905	20.0699	19.6288	18.5335	0.472688	0.645082	0.666742	0.676152	0.661292	0.624391
81278	Tepsin	10	-	105373936	105373950	14	105373946	1	mPAS	protein_coding		1189	0.000584618	0.00167629	0.000853697	0.0133571	0.00165619	0.00165619	0.0541275	0.114482	0.0667755	0.380105	0.103739	0.103739	12	4.86796	6.16136	5.92182	4.4908	4.37188	5.16276	225.754	225.754	225.754	225.754	225.754	92.9155	64.9677	73.038	96.4737	94.047	84.2884	0.411579	0.287781	0.323529	0.42734	0.416591	0.373364
71662	RGD1308134	10	-	54951978	54951998	20	54951991	1	mPAS	protein_coding		1149	0.00131566	0.00268205	0.00274864	0.00977646	0.00161352	0.00268205	0.0838996	0.147648	0.135541	0.323896	0.10187	0.135541	12	4.00729	3.72354	3.93672	4.43505	3.39648	3.89982	208.923	208.923	208.923	208.923	208.923	84.8273	84.0275	85.0569	79.7487	84.2182	83.5757	0.406022	0.402194	0.407122	0.381714	0.403107	0.400032
520900	-	8	+	42122520	42122534	14	42122529				-	2335	0.00429288	0.00607135	0.00393161	0.00233761	0.001542	0.00393161	0.180329	0.237156	0.164695	0.139279	0.099856	0.164695	12	8.44682	10.355	8.44193	9.84992	8.62616	9.14396	413.89	413.89	413.89	413.89	413.89	169.577	121.492	171.111	153.299	178.645	158.825	0.409714	0.293536	0.41342	0.370385	0.431625	0.383736
193714	Pcca	15	+	99968266	99968271	5	99968267	1		protein_coding		207	0.0026284	0.00505698	0.000773124	0.00640928	0.00333646	0.00333646	0.131656	0.214775	0.0620003	0.259286	0.16124	0.16124	12	10.8329	10.2753	10.6443	0.199103	11.9401	8.77835	36.6783	36.6783	36.6783	36.6783	36.6783	18.298	19.4079	18.7368	9.16543	11.5073	15.4231	0.498878	0.529139	0.51084	0.249887	0.313735	0.420496
487845	LOC120093766	7	+	20374054	20374091	37	20374083	1		protein_coding		17718	0.00198573	0.00344251	0.00161456	0.00851041	0.00265465	0.00265465	0.112484	0.170286	0.0963791	0.29965	0.138486	0.138486	12	6.12899	3.36308	4.37963	3.33782	4.29031	4.29997	3249.4	3249.4	3249.4	3249.4	3249.4	425.396	752.183	813.937	743.435	824.341	711.858	0.130915	0.231484	0.250489	0.228792	0.253691	0.219074
320258	Snx3	20	+	46025048	46025065	17	46025055	3		protein_coding		750	0.00295521	0.000484815	0.000345175	0.0128254	0.0016545	0.0016545	0.142844	0.0559864	0.0390846	0.373325	0.103739	0.103739	12	4.77062	6.54197	4.90106	5.29762	6.54858	5.61197	130.021	130.021	130.021	130.021	130.021	82.2831	69.9212	82.8186	86.6562	68.7162	78.0791	0.632845	0.537769	0.636963	0.666478	0.528501	0.600511
480524	Arc	7	-	106555968	106555975	7	106555973	1	mPAS	protein_coding		210	0.00232258	0.00255201	0.00346898	0.00573971	0.00419205	0.00346898	0.122666	0.14405	0.154943	0.242711	0.185156	0.154943	12	3.82165	4.05454	3.49345	2.9537	2.4707	3.35881	33.7175	33.7175	33.7175	33.7175	33.7175	35.383	32.2427	37.5431	38.6553	38.8351	36.5318	1.04939	0.95626	1.11346	1.14644	1.15178	1.08347
130761	Gatc	12	+	41276991	41277015	24	41277009	4		protein_coding		459	0.00049175	0.00175355	0.000716931	0.0137165	0.00179009	0.00175355	0.0492634	0.116668	0.0588458	0.386354	0.108696	0.108696	12	4.64093	4.60444	6.55476	6.58941	4.94166	5.46624	84.3214	84.3214	84.3214	84.3214	84.3214	37.684	38.2565	30.6796	29.5431	39.6656	35.1658	0.446909	0.453698	0.363841	0.350363	0.470409	0.417044
297497	-	2	+	148669261	148669262	1	148669262				-	257	0.00112334	0.000620509	0.000945378	0.0126879	0.00310325	0.00112334	0.0780608	0.06525	0.0704751	0.371407	0.154225	0.0780608	12	4.09295	4.09615	5.92462	5.21831	5.58682	4.98377	45.9669	45.9669	45.9669	45.9669	45.9669	40.9518	39.1527	26.3412	35.1877	31.4711	34.6209	0.890897	0.851758	0.573048	0.765501	0.684647	0.75317
127123	Cux1	12	+	20409120	20409129	9	20409126	5		protein_coding		1250	0.00465955	0.000939228	0.00241427	0.00358022	0.00689093	0.00358022	0.190687	0.0830837	0.125602	0.182576	0.254756	0.182576	12	6.13615	6.25004	6.07301	3.43241	4.0703	5.19238	236.014	236.014	236.014	236.014	236.014	31.7273	28.8933	33.2079	49.7216	57.167	40.1434	0.13443	0.122422	0.140703	0.210672	0.242219	0.170089
154576	Ythdc1	14	-	21185436	21185446	10	21185439	4	mPAS	protein_coding		2106	0.000851793	0.00397824	0.00169109	0.00391502	0.00806167	0.00391502	0.0679658	0.185517	0.0996363	0.192163	0.280207	0.185517	12	4.13798	6.23844	6.05194	5.51704	6.11246	5.61157	401.941	401.941	401.941	401.941	401.941	70.5138	36.0878	41.9431	56.329	40.0241	48.9796	0.175433	0.0897837	0.104351	0.140142	0.0995768	0.121857
189683	Rcbtb2	15	+	48363026	48363043	17	48363026	2		protein_coding		288	0.00222084	0.0059372	0.00162189	0.00816838	0.00060839	0.00222084	0.11974	0.235577	0.0966347	0.294859	0.0576735	0.11974	12	5.45018	5.22116	5.67508	4.74777	4.7609	5.17102	53.2816	53.2816	53.2816	53.2816	53.2816	15.7304	15.9457	15.7021	14.8269	14.4454	15.3301	0.295231	0.299273	0.294701	0.278274	0.271114	0.287718
261345	RGD1304884	19	+	48216477	48216487	10	48216484	3		protein_coding		2562	0.00207481	0.00466241	0.0014746	0.00805915	0.00230677	0.00230677	0.114991	0.206217	0.0914629	0.293118	0.127624	0.127624	12	5.88621	5.95992	6.14346	5.32965	6.1759	5.89903	520.849	520.849	520.849	520.849	520.849	257.979	256.087	249.968	259.983	248.68	254.539	0.495304	0.491672	0.479924	0.499152	0.477451	0.488701
475988	Uqcrb	7	-	63815314	63815396	82	63815336	3		protein_coding		19066	0.0014157	0.00193271	0.00431425	0.00888886	0.00209022	0.00209022	0.0881536	0.122269	0.173647	0.307977	0.119818	0.122269	12	0.0827072	0.260045	1.54438	0.0233638	0.38665	0.459429	3646.55	3646.55	3646.55	3646.55	3646.55	1028.05	1002.55	603.933	1033.25	982.858	930.128	0.281924	0.274932	0.165618	0.283349	0.269531	0.255071
61106	Mfsd13a	1	+	245236306	245236319	13	245236313	1	mPAS	protein_coding	XM_008760432.3	956	0.00126656	0.00193662	0.00115039	0.0121865	0.00219983	0.00193662	0.0827615	0.122269	0.0782797	0.363699	0.12321	0.122269	12	6.43775	6.09782	5.81161	4.27182	6.16897	5.7576	171.871	171.871	171.871	171.871	171.871	43.3401	51.8409	58.0806	69.6072	50.1739	54.6085	0.252167	0.301627	0.337932	0.404998	0.291928	0.31773
122050	Psmd9	12	-	33337536	33337546	10	33337546	4		protein_coding		65	0.00470837	0.00123365	0.00739189	0.00236215	0.00304922	0.00304922	0.191697	0.0951249	0.245036	0.139953	0.152255	0.152255	12	8.33139	9.58074	10.4346	10.4142	9.60997	9.67419	11.4031	11.4031	11.4031	11.4031	11.4031	9.32966	7.7811	5.96744	6.15685	8.81397	7.60981	0.818171	0.682368	0.523319	0.539929	0.772947	0.667347
91458	Suz12	10	+	65012508	65012512	4	65012509	5		protein_coding		114	0.00415154	0.00386199	0.00333995	0.00440344	0.0031962	0.00386199	0.177443	0.183053	0.152614	0.206864	0.157367	0.177443	12	6.65621	6.64508	4.7285	4.97233	5.47525	5.69547	22.4205	22.4205	22.4205	22.4205	22.4205	17.652	17.3511	21.855	22.2176	22.627	20.3405	0.787314	0.773893	0.974778	0.990951	1.00921	0.90723
276471	LOC102551095	2	-	170145373	170145381	8	170145377	1		protein_coding		83	0.00579331	0.00533844	0.00270349	0.00111584	0.00402112	0.00402112	0.214677	0.221766	0.134148	0.0890397	0.180079	0.180079	12	8.30218	6.78753	7.36929	6.64727	8.21393	7.46404	14.9781	14.9781	14.9781	14.9781	14.9781	9.12733	11.7037	11.5604	11.749	9.42115	10.7123	0.609379	0.78139	0.771819	0.784412	0.628996	0.715199
8841	Epc2l1	1	-	81934240	81934245	5	81934243	1		protein_coding	XM_039100837.1	23	0.00655208	0.00380094	0.00324672	0.00332475	0.00215266	0.00332475	0.232024	0.181183	0.149429	0.174032	0.121209	0.174032	12	6.01062	3.28954	5.63017	6.54019	3.96817	5.08774	4.04318	4.04318	4.04318	4.04318	4.04318	7.20704	1.68176	7.13375	6.8127	3.7364	5.31433	1.78252	0.415951	1.76439	1.68499	0.924125	1.3144
167510	-	14	+	48085583	48085587	4	48085583				-	411	0.00334881	0.00266653	0.00176877	0.00215036	0.00915235	0.00266653	0.15548	0.147648	0.102502	0.133117	0.303582	0.147648	12	10.3937	0.289222	11.7965	11.8211	10.841	9.0283	77.5396	77.5396	77.5396	77.5396	77.5396	56.7451	30.4333	41.8517	41.3383	56.8182	45.4373	0.731821	0.392487	0.539747	0.533125	0.732764	0.585989
85835	Rmnd5b	10	+	35882538	35882564	26	35882554	2		protein_coding	NM_001017473.1	303	0.00212	0.00688511	0.00192623	0.000553784	0.00763296	0.00212	0.11595	0.256934	0.108669	0.06139	0.273898	0.11595	12	7.83362	7.16597	6.14593	6.78861	7.67145	7.12112	53.0243	53.0243	53.0243	53.0243	53.0243	14.8747	18.6259	19.2382	19.0319	15.7196	17.4981	0.280526	0.351271	0.362818	0.358928	0.29646	0.330001
245822	Slc12a2	18	+	51416432	51416460	28	51416448	1	mPAS	protein_coding		1735	0.0035096	0.00246424	0.00133236	0.0105858	0.00128387	0.00246424	0.159448	0.141003	0.0856512	0.337862	0.0894001	0.141003	12	1.5596	1.53071	10.757	10.7951	0.445021	5.01748	324.155	324.155	324.155	324.155	324.155	41.2162	43.3272	87.4576	89.7946	82.4444	68.848	0.12715	0.133662	0.269801	0.277011	0.254336	0.212392
436759	-	5	+	157973684	157973685	1	157973684				-	170	0.00446139	0.00551356	0.00223566	0.00475833	0.00229262	0.00446139	0.185203	0.225928	0.118726	0.217425	0.127062	0.185203	12	4.55413	6.55694	5.45254	4.66951	5.88418	5.42346	34.7789	34.7789	34.7789	34.7789	34.7789	18.7527	14.9695	19.1722	18.2883	18.1933	17.8752	0.539198	0.430419	0.551261	0.525845	0.523114	0.513967
348422	Ttc17	3	+	80371942	80371944	2	80371943	2		protein_coding	XM_017591720.2	577	0.00425302	0.00231172	0.00504471	0.00316131	0.00449729	0.00425302	0.180084	0.134996	0.193251	0.168424	0.193524	0.180084	12	9.91364	9.62024	9.62249	10.3713	9.87313	9.88016	94.6739	94.6739	94.6739	94.6739	94.6739	61.969	62.8896	64.2067	54.502	63.2492	61.3633	0.654552	0.664276	0.678187	0.575682	0.668074	0.648154
334370	-	3	-	119594805	119594806	1	119594805				-	243	0.00238164	0.00120696	0.00244235	0.0116298	0.00170415	0.00238164	0.123496	0.0951249	0.125602	0.353386	0.105065	0.123496	12	0.23931	10.5593	11.2962	10.3793	10.9591	8.68663	46.4458	46.4458	46.4458	46.4458	46.4458	24.1677	31.637	31.2254	31.4845	32.0348	30.1099	0.520342	0.68116	0.672298	0.677876	0.689724	0.64828
284193	Cth	2	-	246975890	246975900	10	246975892	1	mPAS	protein_coding		740	0.00527163	0.00457335	0.00314647	0.00434937	0.00213076	0.00434937	0.203911	0.203983	0.146729	0.204839	0.120618	0.203911	12	0.796294	0.484989	0.459578	11.1882	10.8578	4.75736	134.815	134.815	134.815	134.815	134.815	44.1366	47.4523	48.7003	51.1008	48.0624	47.8905	0.327386	0.351981	0.361239	0.379044	0.356506	0.355231
255120	-	19	-	52848905	52848942	37	52848909				-	372	0.00166274	0.00899907	0.00429147	0.0039006	0.000708247	0.0039006	0.0985424	0.304673	0.173647	0.192048	0.0633572	0.173647	12	9.31369	10.422	9.21591	9.48841	9.406	9.56921	68.9166	68.9166	68.9166	68.9166	68.9166	26.0466	21.9043	26.505	26.9361	26.9345	25.6653	0.377943	0.317837	0.384596	0.39085	0.390827	0.372411
93946	LOC108352124	10	+	81981804	81981828	24	81981825	3		lncRNA	XR_001840274.2	552	0.00432051	0.00577084	0.0029706	0.00301064	0.00352549	0.00352549	0.181011	0.231687	0.141947	0.162877	0.166358	0.166358	12	2.43734	4.22964	2.95722	4.43372	2.44537	3.30066	100.842	100.842	100.842	100.842	100.842	60.2886	51.1646	65.1648	45.0787	61.7609	56.6915	0.597855	0.507376	0.64621	0.447025	0.612455	0.562184
335534	-	3	-	133658715	133658759	44	133658733				-	248	0.0012596	0.00438178	0.00319346	0.00428663	0.00652479	0.00428663	0.0826299	0.198223	0.148173	0.203159	0.24609	0.198223	12	6.3501	6.31969	6.1807	4.24625	3.30236	5.27982	44.5201	44.5201	44.5201	44.5201	44.5201	19.2583	19.3739	21.2378	33.5428	28.4646	24.3755	0.432576	0.435171	0.477039	0.75343	0.639365	0.547516
223467	Pdlim7	17	+	9131403	9131416	13	9131409	1		protein_coding		1588	0.00131985	0.00449568	0.00384947	0.00128299	0.00873572	0.00384947	0.0839473	0.201367	0.162563	0.0972722	0.295757	0.162563	12	4.41826	4.84679	3.05824	4.7108	5.89599	4.58602	280.311	280.311	280.311	280.311	280.311	146.154	136.842	142.575	142.829	81.9001	130.06	0.521398	0.488178	0.508633	0.509539	0.292176	0.463985
117463	N4bp2l2	12	-	164756	164762	6	164759	4		protein_coding		29	0.00585857	0.00364612	0.00365029	0.00375481	0.00283092	0.00365029	0.216842	0.175439	0.159029	0.18767	0.144769	0.175439	12	8.36396	7.08145	7.49799	6.52907	6.04402	7.1033	4.83568	4.83568	4.83568	4.83568	4.83568	1.89	5.66026	4.32874	6.55406	6.81213	5.04904	0.390846	1.17052	0.895166	1.35535	1.40872	1.04412
226843	-	17	+	45582097	45582099	2	45582098				-	129	0.00776569	0.00208983	0.00434187	0.00210237	0.00345372	0.00345372	0.252679	0.127813	0.174097	0.131169	0.164191	0.164191	12	10.1665	9.97919	10.1799	9.98458	10.8047	10.223	23.5076	23.5076	23.5076	23.5076	23.5076	27.7197	27.9896	27.4021	27.556	25.3308	27.1997	1.17918	1.19066	1.16567	1.17222	1.07756	1.15706
119120	Ap5z1	12	-	12094566	12094589	23	12094581	3		protein_coding		1393	0.00192449	0.00101354	0.00301845	0.0123511	0.00149654	0.00192449	0.109724	0.0877027	0.143065	0.365549	0.0977894	0.109724	12	6.3337	3.87386	6.24427	5.09052	6.34061	5.57659	264.226	264.226	264.226	264.226	264.226	47.3468	81.0691	50.4604	78.5377	47.1858	60.92	0.179191	0.306818	0.190975	0.297237	0.178582	0.23056
258834	Pskh1	19	+	33824326	33824326	0	33824326	2		protein_coding		100	0.00106183	0.00618985	0.00325827	0.00399764	0.00540891	0.00399764	0.0752691	0.240014	0.149743	0.194919	0.219937	0.194919	12	0.449857	11.4255	0.37097	10.4433	10.9919	6.73632	18.3595	18.3595	18.3595	18.3595	18.3595	11.5583	16.9912	11.9324	18.0229	18.3399	15.3689	0.629554	0.925472	0.649928	0.981663	0.998932	0.83711
507535	LOC100125362	8	-	53065927	53065931	4	53065930	4		protein_coding		455	0.0053095	0.00312434	0.00114931	0.00942777	0.000946066	0.00312434	0.20438	0.16029	0.0782797	0.316154	0.0749232	0.16029	12	5.84142	6.34802	4.67066	5.37418	4.64129	5.37512	91.0542	91.0542	91.0542	91.0542	91.0542	66.8119	59.7563	64.6631	69.1742	65.4788	65.1768	0.73376	0.656271	0.71016	0.759704	0.719119	0.715803
214240	LOC120097948	17	-	8592075	8592094	19	8592075	1		lncRNA		126	0.005909	0.0035094	0.00299292	0.00229704	0.00526289	0.0035094	0.217947	0.172253	0.142712	0.13842	0.215787	0.172253	12	10.8438	0.090506	10.3982	0.27012	11.4212	6.60477	22.2011	22.2011	22.2011	22.2011	22.2011	13.8287	9.74104	14.1456	8.75776	12.5385	11.8023	0.622882	0.438764	0.637158	0.394474	0.564768	0.531609
202868	Rps24	16	+	94241	94277	36	94267	2	mPAS	protein_coding		26259	0.00384406	0.00725902	0.00254826	0.00179048	0.00478514	0.00384406	0.169318	0.26712	0.129067	0.117482	0.201834	0.169318	12	0.14289	11.6272	11.746	10.836	0.334175	6.93727	4964.58	4964.58	4964.58	4964.58	4964.58	789.454	993.988	963.391	1141.26	694.786	916.576	0.159017	0.200216	0.194053	0.229881	0.139949	0.184623
561770	Ogt	X	-	66809875	66809875	0	66809875	5		protein_coding	XM_006257057.4	107	0.00186276	0.00327069	0.00103045	0.00851101	0.00556417	0.00327069	0.10736	0.165394	0.0748223	0.29965	0.22339	0.165394	12	4.02138	2.298	2.25038	2.62814	3.03741	2.84706	21.0509	21.0509	21.0509	21.0509	21.0509	12.2554	21.8582	22.5844	20.7885	19.5309	19.4035	0.582182	1.03835	1.07285	0.987536	0.927797	0.921743
97529	Pgs1	10	+	103250253	103250263	10	103250255	1	mPAS	protein_coding		353	0.00340316	0.00341532	0.00512932	0.00497976	0.00332627	0.00341532	0.156857	0.169469	0.194854	0.222736	0.161025	0.169469	12	4.57382	6.1954	6.04722	4.36242	6.19588	5.47495	57.8552	57.8552	57.8552	57.8552	57.8552	42.748	19.8479	22.7874	44.3701	19.7787	29.9064	0.738879	0.343062	0.393869	0.766916	0.341865	0.516918
149824	Copa	13	+	84586855	84586886	31	84586876	1	mPAS	protein_coding	NM_001134540.1	7907	0.000416433	0.00260414	0.000881445	0.0135597	0.00282803	0.00260414	0.0443781	0.145598	0.0681072	0.384094	0.144769	0.144769	12	11.9842	10.2617	0.085738	0.170391	10.9426	6.68891	1486.77	1486.77	1486.77	1486.77	1486.77	163.72	212.561	156.177	149.013	213.315	178.957	0.110118	0.142968	0.105044	0.100226	0.143475	0.120366
54295	Gpr26	1	+	186805424	186805437	13	186805435	3	mPAS	protein_coding		109	0.0057446	0.00102569	0.00762247	0.000927717	0.0050068	0.0050068	0.214121	0.0878879	0.250328	0.0815956	0.207983	0.207983	12	6.52052	8.54334	7.88415	8.46235	6.63683	7.60944	17.6359	17.6359	17.6359	17.6359	17.6359	13.7503	10.7276	13.0454	11.0582	13.8716	12.4906	0.779679	0.608285	0.739712	0.627031	0.786559	0.708253
209374	Sgcz	16	+	54484106	54484107	1	54484107	9		protein_coding		21	0.00306211	0.0054827	0.00549918	0.00181643	0.00455333	0.00455333	0.147786	0.225407	0.204254	0.117964	0.195142	0.195142	12	8.46695	7.98907	8.51206	4.09122	4.26239	6.66434	4.45833	4.45833	4.45833	4.45833	4.45833	2.22961	4.44404	2.36668	5.20305	5.6372	3.97612	0.500099	0.996794	0.530844	1.16704	1.26442	0.891839
40387	-	1	+	82760854	82760895	41	82760875				-	1187	0.00402255	0.00210491	0.00378635	0.00877279	0.00175731	0.00378635	0.173479	0.127813	0.161453	0.305815	0.107213	0.161453	12	2.74587	3.88027	3.21889	3.13097	3.50087	3.29537	221.596	221.596	221.596	221.596	221.596	56.2259	57.9153	58.0315	59.8554	60.4616	58.4979	0.253731	0.261355	0.261879	0.27011	0.272845	0.263984
339187	Pmepa1	3	-	162012670	162012781	111	162012777	4		protein_coding		9104	0.00119653	0.0149558	0.000827404	0.00265249	0.000836946	0.00119653	0.0803023	0.412642	0.0655474	0.150959	0.0704233	0.0803023	12	11.9755	10.4449	0.0776981	10.1835	10.4471	8.62574	1678.1	1678.1	1678.1	1678.1	1678.1	190.42	291.85	177.898	298.114	293.419	250.34	0.113474	0.173917	0.106012	0.17765	0.174853	0.149181
223337	LOC100365564	17	+	8345235	8345260	25	8345241	1	mPAS	pseudogene		3420	0.00158558	0.00597673	0.00140967	0.00401363	0.00761578	0.00401363	0.0958165	0.235577	0.088647	0.195193	0.273591	0.195193	12	4.83301	6.61628	6.18689	5.67054	6.34057	5.92946	685.526	685.526	685.526	685.526	685.526	269.206	198.572	233.694	260.688	220.193	236.471	0.392699	0.289664	0.340897	0.380275	0.321202	0.344947
254112	Wwox	19	-	43350139	43350156	17	43350145	3		protein_coding	XM_039097635.1	392	0.000484056	0.00604142	0.00104938	0.012547	0.000480082	0.00104938	0.0490168	0.236652	0.075567	0.369283	0.0511609	0.075567	12	9.78075	8.82963	8.70086	9.2523	9.78176	9.26906	74.7974	74.7974	74.7974	74.7974	74.7974	22.593	21.5299	21.661	22.8302	22.3974	22.2023	0.302056	0.287843	0.289595	0.305228	0.299441	0.296833
486472	-	7	+	8685120	8685152	32	8685150				-	810	0.00236956	0.0110709	0.000892006	0.00536157	0.000959189	0.00236956	0.123496	0.348062	0.0684237	0.232288	0.0752079	0.123496	12	0.785726	2.19117	0.271994	1.5902	2.32557	1.43293	147.523	147.523	147.523	147.523	147.523	42.4771	27.8334	41.959	36.0136	23.5185	34.3603	0.287935	0.188671	0.284422	0.244121	0.159422	0.232914
153933	Septin11	14	-	14913991	14913996	5	14913994	8		protein_coding		254	0.00271728	0.00164263	0.00109923	0.000826704	0.0145332	0.00164263	0.134833	0.112988	0.0780105	0.0763568	0.391397	0.112988	12	10.0751	9.13174	10.3802	9.6391	9.54184	9.75359	45.111	45.111	45.111	45.111	45.111	16.4154	22.0851	13.9907	19.103	19.8393	18.2867	0.363889	0.489573	0.310139	0.423467	0.439789	0.405371
496919	Atf4	7	+	111806421	111806459	38	111806448	1		protein_coding		38594	0.00128496	0.00309581	0.00146717	0.0138553	0.00116154	0.00146717	0.0831119	0.159739	0.0913585	0.388967	0.0832664	0.0913585	12	0.672855	0.746963	0.206664	0.515624	0.189486	0.466318	7294.05	7294.05	7294.05	7294.05	7294.05	1077.55	1076.23	1223.23	1152.83	1228.56	1151.68	0.14773	0.147549	0.167703	0.15805	0.168433	0.157893
572064	-	X	+	63059332	63059332	0	63059332				-	38	0.00458577	0.00376539	0.00192112	0.00636223	0.00423124	0.00423124	0.188153	0.180087	0.108669	0.25804	0.18611	0.18611	12	10.6555	9.51319	10.3567	11.5693	8.22721	10.0644	7.59288	7.59288	7.59288	7.59288	7.59288	10.2388	10.4416	10.8817	7.49239	5.96773	9.00445	1.34848	1.37519	1.43314	0.986766	0.785964	1.18591
65417	Tsc2	10	-	13621119	13621192	73	13621142	1	mPAS	protein_coding		1694	0.00292861	0.00177207	0.00489946	0.00772504	0.00361937	0.00361937	0.142206	0.116668	0.189515	0.286929	0.169279	0.169279	12	5.98367	3.97134	5.37507	4.96564	4.41827	4.9428	314.063	314.063	314.063	314.063	314.063	44.6208	93.3655	67.4934	80.4821	92.8569	75.7637	0.142076	0.297283	0.214904	0.256261	0.295663	0.241237
162126	Fancl	14	-	100257686	100257687	1	100257687	4		protein_coding	XM_039092114.1	24	0.00548009	0.0045983	0.00391584	0.00502378	0.00202481	0.0045983	0.207674	0.204497	0.164491	0.222864	0.117663	0.204497	12	7.92754	7.27581	4.02561	6.11142	4.65304	5.99868	4.8701	4.8701	4.8701	4.8701	4.8701	5.32681	7.78522	4.79	9.73299	7.1739	6.96178	1.09378	1.59858	0.983553	1.99852	1.47305	1.4295
59330	Il33	1	+	227736711	227736711	0	227736711	2		protein_coding		83	0.0022255	0.00323226	0.00131245	0.0138895	0.000389964	0.0022255	0.11978	0.164442	0.0851757	0.388967	0.0445291	0.11978	12	10.71	11.6951	9.43516	9.05148	10.8096	10.3403	15.9329	15.9329	15.9329	15.9329	15.9329	12.139	7.77106	12.7657	11.6716	12.0657	11.2826	0.761884	0.487736	0.801216	0.732544	0.75728	0.708132
372895	Pcyox1	4	-	118830968	118830968	0	118830968	3		protein_coding		127	0.000551218	0.00598126	0.000933798	0.0127554	0.00102252	0.00102252	0.0519437	0.235577	0.0701055	0.372311	0.0776848	0.0776848	12	8.28305	9.52632	9.39452	9.52467	8.25822	8.99736	22.4399	22.4399	22.4399	22.4399	22.4399	12.5983	10.7455	11.7541	10.6115	12.5287	11.6476	0.561422	0.478855	0.523806	0.472887	0.558323	0.519059
257786	Mri1	19	+	23913318	23913345	27	23913321	2	mPAS	protein_coding		1426	0.00184301	0.00410036	0.00448827	0.0041232	0.00671329	0.0041232	0.106609	0.189542	0.178841	0.198998	0.250522	0.189542	12	3.69377	5.00732	4.01667	4.10116	3.87171	4.13813	256.792	256.792	256.792	256.792	256.792	122.521	108.376	127.199	122.945	126.688	121.546	0.47712	0.422039	0.49534	0.478771	0.49335	0.473324
294335	Lrrc34	2	+	112774431	112774468	37	112774464	1	mPAS	protein_coding		291	0.00112931	0.00414386	0.00559342	0.000984035	0.00942702	0.00414386	0.0781337	0.190522	0.206307	0.0838892	0.305796	0.190522	12	7.58942	8.3741	8.62732	7.80848	8.34511	8.14889	50.724	50.724	50.724	50.724	50.724	27.3171	22.0184	20.3356	26.359	22.0595	23.6179	0.538544	0.434083	0.400907	0.519655	0.434893	0.465616
56158	Snx32	1	+	202802062	202802074	12	202802068	4		protein_coding		2223	0.00641019	0.00225685	0.000754729	0.00383914	0.00806464	0.00383914	0.229502	0.133433	0.0606783	0.190022	0.280207	0.190022	12	4.3205	6.20363	4.99355	4.73884	4.67233	4.98577	408.741	408.741	408.741	408.741	408.741	79.2777	55.6943	78.3815	82.5236	81.1963	75.4147	0.193956	0.136258	0.191763	0.201897	0.19865	0.184505
405827	Dcaf12	5	-	56462207	56462240	33	56462210	3		protein_coding		904	0.00547176	0.00293789	0.00239464	0.00441235	0.00646652	0.00441235	0.207607	0.156279	0.125283	0.206976	0.24446	0.206976	12	10.9414	10.4079	9.47145	10.0339	11.4956	10.47	167.594	167.594	167.594	167.594	167.594	45.6294	53.4585	54.4065	53.2217	35.3962	48.4224	0.272262	0.318976	0.324633	0.317563	0.211202	0.288927
16939	Man2a2	1	-	134305375	134305425	50	134305395	8		protein_coding		226	0.00950077	0.0033901	0.00360988	0.002732	0.00248727	0.0033901	0.291271	0.168745	0.157905	0.154103	0.132753	0.157905	12	4.50969	6.34431	4.57263	4.49037	5.72507	5.12842	40.383	40.383	40.383	40.383	40.383	25.9212	20.3498	26.2364	25.5937	24.7695	24.5741	0.641883	0.503921	0.64969	0.633773	0.613364	0.608526
325814	Acvr1c	3	-	42855205	42855210	5	42855206	3		protein_coding		175	0.00236433	0.0052179	0.00717121	0.00155653	0.0056435	0.0052179	0.123496	0.218359	0.240736	0.109119	0.225152	0.218359	12	10.1142	9.95886	9.96953	11.0833	9.92714	10.2106	27.5633	27.5633	27.5633	27.5633	27.5633	23.9046	23.6755	24.5348	20.5191	24.9114	23.5091	0.867264	0.858952	0.890127	0.744436	0.90379	0.852914
522754	LOC120094166	8	+	55473743	55473743	0	55473743	3		lncRNA		496	0.00503904	0.00806128	0.0037093	0.00331417	0.00186395	0.0037093	0.199532	0.286445	0.15989	0.173964	0.110849	0.173964	12	10.5838	8.92474	9.36955	10.0492	10.8161	9.94868	94.5753	94.5753	94.5753	94.5753	94.5753	53.4097	51.0682	54.8213	58.1521	50.5976	53.6098	0.564732	0.539974	0.579657	0.614876	0.534998	0.566847
158638	-	14	-	69725229	69725230	1	69725230				-	120	0.00357479	0.00561365	0.00286298	0.00644278	0.0034979	0.00357479	0.161486	0.228008	0.139021	0.259979	0.165548	0.165548	12	0.173212	10.0142	10.9062	10.4519	9.82528	8.27415	20.6547	20.6547	20.6547	20.6547	20.6547	8.12203	19.2176	17.1515	18.5667	19.4599	16.5035	0.39323	0.930426	0.830392	0.898909	0.942155	0.799022
152451	Idua	14	-	1031588	1031604	16	1031591	2	mPAS	protein_coding		1181	0.00167855	0.00112469	0.0051904	0.0103373	0.00381242	0.00381242	0.0990811	0.0911139	0.196228	0.333138	0.174223	0.174223	12	5.12674	6.41865	6.26087	4.71817	5.45944	5.59677	213.223	213.223	213.223	213.223	213.223	76.1736	53.9062	58.2511	77.2335	74.2743	67.9678	0.357249	0.252816	0.273194	0.36222	0.348341	0.318764
235104	-	18	-	32052926	32052926	0	32052926				-	146	0.00214986	0.00389509	0.00303725	0.0116005	0.00157053	0.00303725	0.117107	0.183373	0.143319	0.35321	0.100555	0.143319	12	9.66774	8.6716	9.82798	9.67407	9.86786	9.54185	25.248	25.248	25.248	25.248	25.248	15.4431	17.271	15.761	15.3135	15.7526	15.9082	0.611655	0.684053	0.624245	0.606522	0.623915	0.630078
283742	St6galnac5	2	-	241820885	241820887	2	241820886	3		protein_coding		1767	0.00121456	0.00763952	0.00106701	0.0101478	0.0023647	0.0023647	0.0806114	0.275515	0.076663	0.32985	0.129699	0.129699	12	6.86252	6.60508	5.15531	5.34386	4.89776	5.77291	348.37	348.37	348.37	348.37	348.37	141.564	151.509	154.524	159.4	147.986	150.996	0.40636	0.434909	0.443563	0.457559	0.424795	0.433437
75100	Ppm1e	10	-	72051642	72051656	14	72051653	2	mPAS	protein_coding	XM_039086380.1	3753	0.00118196	0.00841104	0.00503292	0.00528394	0.00265706	0.00503292	0.0799135	0.292413	0.193032	0.230814	0.138486	0.193032	12	10.6306	8.99902	9.04996	10.711	9.81682	9.84149	700.456	700.456	700.456	700.456	700.456	109.68	133.257	135.671	105.213	133.589	123.482	0.156584	0.190244	0.19369	0.150206	0.190718	0.176288
178927	-	15	-	46315153	46315155	2	46315153				-	967	0.0101982	0.000998836	0.00219562	0.00762734	0.00158992	0.00219562	0.303813	0.0871429	0.117384	0.285638	0.100584	0.117384	12	9.79279	8.70015	9.9629	8.85128	9.51582	9.36459	169.069	169.069	169.069	169.069	169.069	85.3066	84.5182	84.2287	85.2389	91.4218	86.1428	0.504567	0.499903	0.498191	0.504166	0.540736	0.509513
137699	Brinp2	13	-	70481415	70481416	1	70481416	3		protein_coding		26	0.00262424	0.00806378	0.00192652	0.00503645	0.0049971	0.0049971	0.131656	0.286445	0.108669	0.223072	0.207983	0.207983	12	1.71085	2.57656	1.6971	2.76512	10.6532	3.88056	5.4684	5.4684	5.4684	5.4684	5.4684	7.38981	6.47664	7.28515	5.67638	1.15137	5.59587	1.35137	1.18438	1.33223	1.03803	0.21055	1.02331
187329	Myh6	15	+	28421496	28421536	40	28421511	1		protein_coding	XM_017599641.2	128	0.00714202	0.00166404	0.00407258	0.00294216	0.00698196	0.00407258	0.243089	0.113994	0.168594	0.161094	0.256925	0.168594	12	4.97247	6.97155	5.06978	6.0922	8.07119	6.23544	21.5022	21.5022	21.5022	21.5022	21.5022	16.1465	15.8722	16.7126	18.365	7.47842	14.915	0.750923	0.738167	0.777253	0.854102	0.347799	0.693649
240282	Rbbp8	18	+	2988840	2988857	17	2988848	1	mPAS	protein_coding	XM_039096750.1	374	0.00272426	0.00882998	0.00353338	0.00635165	0.00139067	0.00353338	0.134968	0.299891	0.155415	0.25794	0.0954989	0.155415	12	2.95385	2.21576	2.99832	2.30429	2.85461	2.66537	68.7849	68.7849	68.7849	68.7849	68.7849	24.2541	25.0924	25.473	23.8791	26.0834	24.9564	0.352607	0.364796	0.370329	0.347156	0.379202	0.362818
25149	Drap1	1	-	202732253	202732292	39	202732283	2		protein_coding		8996	0.00698319	0.0054485	0.00153583	0.00587701	0.00311704	0.0054485	0.24064	0.224468	0.0934668	0.246547	0.154669	0.224468	12	10.1458	10.8877	10.5112	0.111859	11.4011	8.61153	1700.44	1700.44	1700.44	1700.44	1700.44	269.908	256.801	265.176	165.595	228.485	237.193	0.158728	0.15102	0.155945	0.0973834	0.134368	0.139489
404887	Zfp292	5	-	49388808	49388823	15	49388817	6		protein_coding		243	0.00403073	0.00140219	0.00800844	0.00648885	0.00309302	0.00403073	0.173479	0.102559	0.256205	0.260514	0.153958	0.173479	12	8.41787	8.68405	8.43739	8.6603	6.7352	8.18696	42.5026	42.5026	42.5026	42.5026	42.5026	16.7984	15.8942	17.4627	16.6441	19.0028	17.1604	0.395233	0.37396	0.410862	0.391603	0.447097	0.403751
556268	Dlgap1	9	+	110725998	110726001	3	110726001	16		protein_coding	XM_039084188.1	127	0.00109938	0.0046042	0.00349579	0.0021559	0.0117114	0.00349579	0.0774126	0.204497	0.154946	0.1332	0.345649	0.154946	12	7.47426	5.84902	6.39414	8.15071	8.12882	7.19939	23.0021	23.0021	23.0021	23.0021	23.0021	12.4046	18.516	18.0681	7.6396	7.65166	12.856	0.539281	0.80497	0.785497	0.332126	0.33265	0.558905
330086	-	3	-	83904416	83904416	0	83904416				-	77	0.0024431	0.0035647	0.00473348	0.00866257	0.00371499	0.00371499	0.125629	0.173213	0.185582	0.303639	0.171478	0.173213	12	3.0958	2.51832	4.29297	3.28291	3.94223	3.42645	12.6751	12.6751	12.6751	12.6751	12.6751	14.554	14.082	12.119	13.6159	13.3942	13.553	1.14824	1.111	0.956121	1.07422	1.05673	1.06926
75907	Utp18	10	-	78823819	78823855	36	78823821	5		protein_coding		6253	0.00262816	0.00804925	0.00219222	0.00820679	0.0021127	0.00262816	0.131656	0.286445	0.117384	0.29494	0.120432	0.131656	12	9.38602	10.6351	9.9142	10.3842	9.78338	10.0206	1066.88	1066.88	1066.88	1066.88	1066.88	704.254	577.43	704.39	615.673	716.445	663.638	0.660107	0.541234	0.660235	0.577079	0.671534	0.622038
113093	-	11	+	46996301	46996304	3	46996301				-	153	0.00338159	0.00418899	0.00568137	0.00572264	0.00431895	0.00431895	0.156544	0.192135	0.208582	0.242391	0.188868	0.192135	12	10.6928	9.29447	11.2705	9.94568	10.0857	10.2578	26.8536	26.8536	26.8536	26.8536	26.8536	23.9508	23.733	20.9274	24.7803	26.2188	23.922	0.891903	0.88379	0.779313	0.922791	0.976361	0.890832
569186	Iqsec2	X	+	21305282	21305305	23	21305297	2		protein_coding		836	0.00282434	0.00474273	0.00378839	0.00654053	0.00543538	0.00474273	0.139274	0.208319	0.161453	0.262257	0.220167	0.208319	12	4.8767	4.91488	6.87084	6.20826	4.8696	5.54805	152.718	152.718	152.718	152.718	152.718	31.3478	31.3031	29.1488	33.9151	31.4692	31.4368	0.205266	0.204973	0.190867	0.222077	0.206061	0.205849
117385	-	11	+	86146420	86146421	1	86146421				-	382	0.00643707	0.00251936	0.00696064	0.00158983	0.00588893	0.00588893	0.229946	0.14287	0.236173	0.110059	0.232028	0.229946	12	5.89592	6.57714	6.53477	4.57635	4.5473	5.6263	76.0207	76.0207	76.0207	76.0207	76.0207	34.9292	27.3875	27.7352	36.1153	36.8365	32.6007	0.45947	0.360264	0.364838	0.475072	0.48456	0.428841
27386	Fxn	1	-	221874093	221874118	25	221874115	2		protein_coding		3472	0.0028749	0.00180354	0.00100533	0.0130797	0.00463329	0.0028749	0.140878	0.117367	0.0733937	0.375222	0.198205	0.140878	12	5.58643	4.19937	6.35704	5.0958	6.26186	5.5001	637.028	637.028	637.028	637.028	637.028	171.824	199.365	119.191	193.549	125.086	161.803	0.269728	0.312961	0.187104	0.303831	0.196359	0.253997
339828	Rgs19	3	-	168804519	168804533	14	168804532	2	mPAS	protein_coding		402	0.00252804	0.000661054	0.00408811	0.0129439	0.00326458	0.00326458	0.128865	0.0681594	0.168594	0.37401	0.159497	0.159497	12	4.01658	5.41779	6.18175	3.43852	4.33461	4.67785	77.0473	77.0473	77.0473	77.0473	77.0473	29.2584	23.995	15.557	26.5477	29.8748	25.0466	0.379746	0.311432	0.201915	0.344563	0.387746	0.32508
549862	-	9	+	58723117	58723127	10	58723119				-	546	0.00136019	0.0135916	0.00407539	0.00106133	0.00354061	0.00354061	0.0858759	0.389206	0.168594	0.0866447	0.166824	0.166824	12	8.87753	10.4525	10.0856	8.78968	9.04768	9.45059	101.633	101.633	101.633	101.633	101.633	44.8731	41.82	46.9812	45.6747	46.2186	45.1135	0.441519	0.411479	0.462262	0.449406	0.454758	0.443885
404240	Fut9	5	-	39353336	39353337	1	39353336	4		protein_coding		65	0.00649206	0.00364582	0.00176844	0.00482319	0.00691482	0.00482319	0.231231	0.175439	0.102502	0.219127	0.255045	0.219127	12	4.87024	4.81488	6.11276	6.22749	6.0372	5.61251	10.0989	10.0989	10.0989	10.0989	10.0989	14.2915	13.5879	14.425	14.0764	14.5568	14.1875	1.41516	1.34549	1.42838	1.39386	1.44143	1.40486
55658	RGD1311946	1	+	200953923	200953954	31	200953950	1	mPAS	protein_coding		1173	0.00674349	0.0012273	0.00617134	0.00693696	0.00258615	0.00617134	0.235592	0.0951249	0.220453	0.270654	0.136426	0.220453	12	8.43884	8.20395	8.44808	8.43546	7.19248	8.14376	210.864	210.864	210.864	210.864	210.864	40.5173	43.6854	40.388	39.0871	60.6801	44.8715	0.192148	0.207173	0.191535	0.185366	0.287768	0.212798
29555	Avpi1	1	-	240930236	240930259	23	240930239	2	mPAS	protein_coding		1074	0.0105228	0.00387268	0.00104106	0.00579247	0.00245309	0.00387268	0.30856	0.183285	0.0751385	0.244616	0.131815	0.183285	12	6.39409	4.57395	5.15892	4.90099	6.40136	5.48587	197.593	197.593	197.593	197.593	197.593	34.1612	48.0585	46.8818	48.8099	34.5422	42.4907	0.172887	0.243219	0.237264	0.247022	0.174815	0.215042
206092	-	16	+	24425405	24425423	18	24425405				-	246	0.00466899	0.00611914	0.0043132	0.00299614	0.00574377	0.00466899	0.190828	0.238436	0.173647	0.162369	0.227438	0.190828	12	8.98909	10.4091	9.04422	9.99343	10.3178	9.75073	42.2065	42.2065	42.2065	42.2065	42.2065	28.4332	29.9143	28.3358	31.1736	30.8064	29.7326	0.673668	0.70876	0.67136	0.738596	0.729896	0.704456
167503	-	14	+	47752586	47752595	9	47752593				-	430	0.00496344	0.0033027	0.00425127	0.00965401	0.00170713	0.00425127	0.198269	0.166747	0.172865	0.321727	0.105065	0.172865	12	10.0087	11.7219	10.0943	9.80894	9.39955	10.2067	74.7546	74.7546	74.7546	74.7546	74.7546	59.8776	35.607	60.2048	60.2308	62.7111	55.7263	0.800989	0.476319	0.805365	0.805713	0.838892	0.745456
305452	Ppa2	2	+	221878064	221878087	23	221878078	1	mPAS	protein_coding		2986	0.00566818	0.00308001	0.00581669	0.00217127	0.00714971	0.00566818	0.212269	0.159739	0.212322	0.133533	0.260981	0.212269	12	4.54054	5.91409	6.50215	4.867	6.54617	5.67399	546.501	546.501	546.501	546.501	546.501	71.9413	69.2862	55.3232	76.4325	55.3856	65.6738	0.13164	0.126781	0.101232	0.139858	0.101346	0.120171
234396	Prob1	18	-	27254404	27254415	11	27254412	1		protein_coding		26	0.00206013	0.00697167	0.00525699	0.00272526	0.00690868	0.00525699	0.114778	0.25925	0.197804	0.153996	0.255045	0.197804	12	9.01501	8.48849	7.2751	9.62144	0.0972164	6.89945	4.92006	4.92006	4.92006	4.92006	4.92006	7.18389	5.24008	0.421756	8.30899	4.5671	5.14436	1.46012	1.06504	0.0857217	1.6888	0.92826	1.04559
40603	Paf1	1	+	83688549	83688631	82	83688628	4		protein_coding		44	0.00500999	0.0019361	0.00376452	0.00965475	0.00369386	0.00376452	0.199177	0.122269	0.161039	0.321727	0.171478	0.171478	12	5.57758	5.44452	4.98859	6.80299	5.17784	5.5983	7.66221	7.66221	7.66221	7.66221	7.66221	9.02389	8.754	8.01376	8.04865	8.47454	8.46297	1.17771	1.14249	1.04588	1.05043	1.10602	1.10451
430977	-	5	+	122003116	122003116	0	122003116				-	125	0.00348555	0.00492075	0.00430376	0.00259635	0.00881263	0.00430376	0.15881	0.211438	0.173647	0.148563	0.297726	0.173647	12	11.1021	0.308063	10.886	10.8405	11.8703	9.0014	22.7509	22.7509	22.7509	22.7509	22.7509	16.9345	10.3143	17.8287	16.961	13.3729	15.0823	0.744345	0.453356	0.783646	0.745508	0.587796	0.66293
455748	-	6	+	37759814	37759821	7	37759821				-	569	0.00395172	0.0125202	0.00322908	0.00240797	0.00202669	0.00322908	0.171982	0.373687	0.149266	0.141386	0.117663	0.149266	12	9.83802	10.4602	10.5585	8.95696	8.87876	9.7385	94.8352	94.8352	94.8352	94.8352	94.8352	72.287	62.6697	62.5986	68.6273	72.9607	67.8287	0.762238	0.660828	0.660077	0.723648	0.769342	0.715226
218011	Sugct	17	-	47378225	47378228	3	47378227	5		protein_coding	XM_039095901.1	104	0.006175	0.00411111	0.00232595	0.00909901	0.0024301	0.00411111	0.223603	0.189763	0.122091	0.310435	0.131755	0.189763	12	10.5423	9.81103	10.5913	9.80717	9.82489	10.1153	16.6165	16.6165	16.6165	16.6165	16.6165	14.722	16.8913	14.4847	17.3403	17.6338	16.2144	0.885984	1.01653	0.871704	1.04355	1.06122	0.975799
565459	-	X	-	123437560	123437566	6	123437561				-	571	0.00159909	0.00599296	0.00343374	0.00635021	0.00678181	0.00599296	0.0961785	0.235577	0.154102	0.25794	0.251895	0.235577	12	10.6519	11.0419	10.9188	10.4044	0.165254	8.63646	101.691	101.691	101.691	101.691	101.691	59.7309	55.4459	57.0659	62.2815	27.4237	52.3896	0.587374	0.545236	0.561167	0.612456	0.269676	0.515182
205069	Mvb12a	16	+	18257103	18257115	12	18257110	1	mPAS	protein_coding	XM_039094298.1	1106	0.00046202	0.00541322	0.00324589	0.010972	0.00412721	0.00412721	0.0470678	0.223547	0.149429	0.343965	0.183258	0.183258	12	6.69917	6.34668	6.05351	5.04135	5.03904	5.83595	202.206	202.206	202.206	202.206	202.206	47.3223	53.1179	57.6168	62.6479	62.2025	56.5815	0.234031	0.262692	0.284942	0.309823	0.30762	0.279822
196623	Plvap	16	-	18184983	18184994	11	18184991	1	mPAS	protein_coding		111	0.00993963	0.00572322	0.00239903	0.00327965	0.00289807	0.00327965	0.298067	0.230358	0.125306	0.17301	0.147254	0.17301	12	6.94125	6.56348	8.58026	6.63379	6.75187	7.09413	18.3695	18.3695	18.3695	18.3695	18.3695	15.3449	14.5109	10.9529	14.7454	14.819	14.0746	0.835347	0.789945	0.596258	0.802713	0.80672	0.766196
193805	-	16	-	42070	42090	20	42070				-	55	0.00501754	0.00404569	0.00693352	0.00370976	0.00464364	0.00464364	0.199177	0.187561	0.236173	0.186705	0.19821	0.19821	12	8.09044	6.13734	6.37992	6.75397	6.82072	6.83648	8.66683	8.66683	8.66683	8.66683	8.66683	4.26228	11.7892	11.4607	10.4668	10.4956	9.69491	0.491792	1.36027	1.32236	1.20768	1.21101	1.11862
65726	-	10	-	14576596	14576620	24	14576600				-	76	0.00876011	0.00177819	0.00585899	0.00323567	0.00481239	0.00481239	0.275713	0.116668	0.213132	0.171259	0.202152	0.202152	12	7.1842	6.13871	6.14916	6.27885	8.0993	6.77004	11.487	11.487	11.487	11.487	11.487	11.4168	12.6995	12.7317	12.7331	7.79488	11.4752	0.993893	1.10556	1.10836	1.10848	0.678584	0.998976
43320	-	1	+	103442864	103442865	1	103442864				-	163	0.00215863	0.00560042	0.00195574	0.00842629	0.00632436	0.00560042	0.117383	0.228008	0.109732	0.29802	0.241397	0.228008	12	6.45521	5.728	6.68439	6.68143	5.52246	6.2143	31.494	31.494	31.494	31.494	31.494	13.1969	15.468	12.0969	12.301	15.8147	13.7755	0.41903	0.49114	0.384101	0.390583	0.502148	0.4374
342378	Gsn	3	+	18638384	18638409	25	18638404	3	mPAS	protein_coding		12286	0.00256354	0.00261864	0.00728087	0.00684199	0.00519214	0.00519214	0.12956	0.146152	0.242862	0.269245	0.213584	0.213584	12	4.9361	4.73627	5.95134	4.62518	5.5977	5.16932	2268.66	2268.66	2268.66	2268.66	2268.66	357.334	349.961	310.486	349.32	340.221	341.464	0.157509	0.154259	0.136859	0.153976	0.149966	0.150514
207009	Scrg1	16	+	32762351	32762353	2	32762351	3		protein_coding	NM_033499.1	135	0.00130591	0.0113816	0.004513	0.00182581	0.00566396	0.004513	0.0838996	0.352244	0.179373	0.118223	0.225684	0.179373	12	10.8673	10.3584	11.0505	11.1197	10.8383	10.8468	25.1178	25.1178	25.1178	25.1178	25.1178	18.8742	19.0256	18.7479	18.1668	19.5888	18.8807	0.751429	0.757454	0.746398	0.723263	0.779878	0.751684
543284	Vapa	9	-	105177899	105177938	39	105177904	1	mPAS	protein_coding		12265	0.00290764	0.00173647	0.00860241	0.00338237	0.00848776	0.00338237	0.141623	0.116668	0.26783	0.1758	0.289834	0.1758	12	10.8189	10.1207	9.90127	9.72754	8.8701	9.88769	2284	2284	2284	2284	2284	209.409	254.72	255.713	260.477	237.861	243.636	0.0916853	0.111524	0.111958	0.114044	0.104142	0.106671
557432	Usp9x	X	-	9723692	9723737	45	9723708	8		protein_coding		428	0.000902313	0.00862113	0.00209174	0.0108498	0.00291512	0.00291512	0.069382	0.296943	0.114926	0.342016	0.147884	0.147884	12	6.40664	7.79964	8.47494	7.77849	8.39298	7.77054	81.0439	81.0439	81.0439	81.0439	81.0439	29.1676	28.0015	22.5808	29.5511	22.208	26.3018	0.359899	0.34551	0.278624	0.364631	0.274024	0.324538
426107	Rad23b	5	+	70127890	70127910	20	70127893	5		protein_coding	NM_001025275.1	1507	0.00323596	0.00232032	0.00728807	0.0113114	0.00127364	0.00323596	0.152616	0.135205	0.242862	0.349771	0.0890902	0.152616	12	10.1045	10.8451	10.0795	10.6259	0.0887968	8.34877	274.42	274.42	274.42	274.42	274.42	66.2565	61.0559	68.1105	59.2856	27.76	56.4937	0.241442	0.22249	0.248198	0.216039	0.101159	0.205865
472287	Plxnc1	7	-	29391395	29391403	8	29391398	2		protein_coding		83	0.00428789	0.0072394	0.00359751	0.00332698	0.00701981	0.00428789	0.180329	0.266707	0.157581	0.174032	0.257423	0.180329	12	8.00093	5.12009	5.79632	4.98012	6.51517	6.08253	13.428	13.428	13.428	13.428	13.428	7.27065	14.5663	16.0389	14.0501	15.3721	13.4596	0.541453	1.08477	1.19443	1.04633	1.14477	1.00235
536416	Actr1b	9	-	38928807	38928838	31	38928822	2	mPAS	protein_coding		1770	0.00375475	0.00427582	0.00853072	0.00194795	0.00731755	0.00427582	0.166894	0.194817	0.26649	0.124219	0.266495	0.194817	12	6.38833	5.38613	6.3899	4.65698	5.50327	5.66492	316.995	316.995	316.995	316.995	316.995	109.763	162.683	107.598	171.593	157.861	141.9	0.346262	0.513205	0.33943	0.541311	0.497993	0.44764
236375	-	18	-	46408948	46408948	0	46408948				-	80	0.00339788	0.00629475	0.00283632	0.0103995	0.00294167	0.00339788	0.156841	0.2426	0.138574	0.333931	0.148519	0.156841	12	5.92208	6.34889	5.4508	6.53202	4.66594	5.78395	16.4232	16.4232	16.4232	16.4232	16.4232	16.754	14.3991	18.6063	13.1206	19.3563	16.4473	1.02014	0.876754	1.13293	0.798904	1.17859	1.00146
450798	Ahnak2	6	-	131855918	131856027	109	131856022	2		protein_coding		147	0.00640538	0.0035412	0.000975859	0.0118025	0.00316985	0.0035412	0.229502	0.172746	0.0719033	0.355948	0.156555	0.172746	12	0.524017	0.146616	10.9984	10.9982	11.9326	6.91997	29.355	29.355	29.355	29.355	29.355	17.3274	20.6478	25.0265	24.9535	21.9569	21.9824	0.590272	0.703384	0.852548	0.85006	0.74798	0.748849
222641	-	17	+	2795376	2795380	4	2795376				-	166	0.00455466	0.0136258	0.00316784	0.00109937	0.00349104	0.00349104	0.187443	0.389811	0.147509	0.0884279	0.16547	0.16547	12	10.5374	11.009	9.17806	10.6503	9.10144	10.0952	31.5811	31.5811	31.5811	31.5811	31.5811	20.0918	18.0016	17.6522	20.2291	16.9148	18.5779	0.636199	0.570013	0.558949	0.640545	0.5356	0.588261
220209	Upf2	17	-	72329963	72330019	56	72329992	4		protein_coding		1100	0.00201714	0.0114399	0.00735028	0.00302104	0.00236162	0.00302104	0.112978	0.353059	0.244166	0.163162	0.129699	0.163162	12	0.0288159	0.243811	11.723	0.6862	0.936892	2.72375	220.54	220.54	220.54	220.54	220.54	82.8826	82.7619	81.2624	81.858	77.6258	81.2782	0.375816	0.375269	0.368469	0.37117	0.35198	0.368541
4110	Rgs17	1	-	42222237	42222251	14	42222240	8	mPAS	protein_coding		972	0.00244477	0.00217589	0.00453929	0.00449944	0.0125925	0.00449944	0.125629	0.130353	0.180193	0.209207	0.359669	0.180193	12	1.42524	0.8848	0.957002	1.75023	2.80085	1.56362	184.585	184.585	184.585	184.585	184.585	50.9306	47.1373	48.1196	51.2564	45.833	48.6554	0.27592	0.255369	0.260691	0.277685	0.248303	0.263594
486229	LOC100360470	7	+	7955367	7955375	8	7955374	1		lncRNA		65	0.00237145	0.00590625	0.00374217	0.0105005	0.0037732	0.0037732	0.123496	0.235339	0.160812	0.336491	0.172908	0.172908	12	0.94878	2.13135	1.83728	2.38234	0.745646	1.60908	11.8544	11.8544	11.8544	11.8544	11.8544	11.4028	10.8844	11.9933	10.6499	10.9064	11.1674	0.961902	0.918168	1.01171	0.89839	0.920027	0.94204
272823	Anxa5	2	-	119314005	119314012	7	119314006	1	mPAS	protein_coding	XM_006232268.4	1882	0.00139656	0.00399307	0.00122241	0.0172965	0.00241993	0.00241993	0.0873932	0.185935	0.0812138	0.439077	0.131755	0.131755	12	6.31715	6.01175	6.25204	5.82857	5.24073	5.93005	362.147	362.147	362.147	362.147	362.147	74.8764	91.5812	78.5301	100.526	124.779	94.0586	0.206757	0.252884	0.216846	0.277584	0.344554	0.259725
323407	Pdcl	3	-	21110162	21110175	13	21110169	1	mPAS	protein_coding	XM_039105777.1	176	0.00529497	0.00335556	0.00289016	0.00236714	0.012445	0.00335556	0.204316	0.167808	0.139276	0.139988	0.359049	0.167808	12	4.36482	4.4551	4.36031	5.85506	4.44206	4.69547	35.2873	35.2873	35.2873	35.2873	35.2873	29.9672	29.1283	30.4329	26.31	30.47	29.2617	0.849233	0.825459	0.862432	0.745592	0.863482	0.82924
408196	Astn2	5	-	78785592	78785602	10	78785602	3		protein_coding		157	0.00139798	0.00617617	0.00181601	0.015134	0.00188161	0.00188161	0.0873932	0.2398	0.103939	0.407865	0.111482	0.111482	12	10.8263	8.83715	8.98143	10.8388	10.6408	10.0249	28.8752	28.8752	28.8752	28.8752	28.8752	18.4366	20.0751	20.681	17.8494	19.0629	19.221	0.638494	0.695238	0.716221	0.618159	0.660184	0.665659
401958	-	5	-	9342304	9342312	8	9342305				-	30	0.00579201	0.00304566	0.00563336	0.0074179	0.00469476	0.00563336	0.214677	0.158819	0.207298	0.282009	0.199688	0.207298	12	11.4514	10.3428	10.2807	0.297608	10.2631	8.52713	4.7831	4.7831	4.7831	4.7831	4.7831	5.91278	6.59187	6.52137	4.00829	6.64439	5.93574	1.23618	1.37816	1.36342	0.838011	1.38914	1.24098
186655	-	15	+	20571445	20571455	10	20571455				-	251	0.00568127	0.00460343	0.00243141	0.00834316	0.00561682	0.00561682	0.212509	0.204497	0.125602	0.297287	0.224935	0.212509	12	2.30177	3.46805	3.12857	3.18511	2.97895	3.01249	46.0618	46.0618	46.0618	46.0618	46.0618	26.5326	24.9032	27.0476	26.3883	27.0434	26.383	0.576022	0.540647	0.587203	0.572888	0.587112	0.572775
96597	Map2k6	10	+	95488293	95488297	4	95488294	2		protein_coding		628	0.00603663	0.00478982	0.00243436	0.0101064	0.00339388	0.00478982	0.221113	0.208606	0.125602	0.32918	0.162472	0.208606	12	1.1908	0.177014	0.424381	1.84607	1.51006	1.02967	116.864	116.864	116.864	116.864	116.864	19.7867	20.5198	20.9785	16.4303	17.9918	19.1414	0.169314	0.175586	0.179511	0.140593	0.153955	0.163792
176403	-	15	-	28345869	28345903	34	28345891				-	356	0.0048003	0.00309741	0.00967048	0.00329255	0.00600731	0.0048003	0.193948	0.159739	0.289439	0.173115	0.233809	0.193948	12	11.02	10.6055	11.1698	10.8803	11.5806	11.0512	64.2121	64.2121	64.2121	64.2121	64.2121	27.5154	28.5384	26.5114	27.5577	23.3831	26.7012	0.428508	0.44444	0.412873	0.429166	0.364154	0.415828
118558	Zscan25	12	-	9326398	9326411	13	9326405	1		protein_coding		347	0.00450643	0.00247793	0.000905915	0.0074724	0.01156	0.00450643	0.186707	0.141531	0.0688257	0.282501	0.342455	0.186707	12	4.98777	4.3276	5.94328	5.78359	4.35061	5.07857	60.6516	60.6516	60.6516	60.6516	60.6516	27.1054	26.9031	21.8079	23.2816	27.1058	25.2408	0.446903	0.443568	0.359561	0.383858	0.44691	0.41616
19659	Dennd2b	1	-	163544073	163544082	9	163544081	3	mPAS	protein_coding	XM_039078199.1	708	0.00664796	0.0100894	0.0031381	0.00234298	0.00478576	0.00478576	0.234057	0.329538	0.146554	0.139337	0.201834	0.201834	12	3.41423	5.99728	3.75766	3.4721	3.45938	4.02013	139.289	139.289	139.289	139.289	139.289	59.569	24.0157	62.4285	63.0152	60.4147	53.8886	0.427665	0.172416	0.448194	0.452406	0.433736	0.386883
513280	Armc8	8	-	100038582	100038659	77	100038589	4		protein_coding		1447	0.00420256	0.0129259	0.00369676	0.000687667	0.0054963	0.00420256	0.179383	0.378984	0.15989	0.0691819	0.221787	0.179383	12	9.10812	8.87515	10.1302	10.3761	10.8679	9.87149	264.214	264.214	264.214	264.214	264.214	122.428	114.163	123.202	123.869	102.669	117.266	0.463366	0.432085	0.466297	0.468822	0.388581	0.44383
26527	Zfp91	1	-	209891341	209891392	51	209891345	11	mPAS	protein_coding		1356	0.00753941	0.00557926	0.00755906	0.00375586	0.00267568	0.00557926	0.249405	0.227739	0.249795	0.18767	0.138616	0.227739	12	10.2917	10.206	10.2493	11.992	10.5867	10.6651	247.789	247.789	247.789	247.789	247.789	93.5277	98.7882	95.5575	73.4479	95.3983	91.3439	0.377449	0.398679	0.385641	0.296413	0.384999	0.368636
262280	Set	19	+	53562304	53562336	32	53562322	3		protein_coding	NM_001012504.1	762	0.00267878	0.00595982	0.0064878	0.000945038	0.0110624	0.00595982	0.133338	0.235577	0.227197	0.0821374	0.333914	0.227197	12	6.11099	5.38114	5.22467	8.07443	5.74536	6.10732	134.079	134.079	134.079	134.079	134.079	56.8623	54.937	53.4938	24.1637	57.0575	49.3029	0.424097	0.409737	0.398974	0.18022	0.425553	0.367716
231858	Greb1l	18	-	1505347	1505350	3	1505347	1		protein_coding	XM_039097266.1	79	0.00427176	0.00606807	0.00628747	0.00453479	0.00613199	0.00606807	0.180329	0.237156	0.223346	0.209762	0.23777	0.223346	12	0.053212	9.08906	9.9672	10.7534	9.17118	7.80681	12.0193	12.0193	12.0193	12.0193	12.0193	5.91153	12.7237	13.8225	12.4959	13.1159	11.6139	0.491837	1.05861	1.15003	1.03965	1.09124	0.966272
83702	Ift140	10	+	14120417	14120489	72	14120419	3		protein_coding		1305	0.00503725	0.00598338	0.000686585	0.00922208	0.00637198	0.00598338	0.199532	0.235577	0.0570782	0.313225	0.242051	0.235577	12	4.16281	5.07053	6.11818	5.60176	6.20406	5.43147	242.998	242.998	242.998	242.998	242.998	58.6492	51.5537	33.4714	44.7663	31.4509	43.9783	0.241357	0.212157	0.137744	0.184225	0.129429	0.180982
271290	Nlgn1	2	-	108256229	108256287	58	108256237	7	mPAS	protein_coding		381	0.00199972	0.00199552	0.00243562	0.0196443	0.00145268	0.00199972	0.112763	0.12385	0.125602	0.478585	0.0964	0.12385	12	0.26762	10.6757	0.30717	10.8889	11.1622	6.66034	68.6455	68.6455	68.6455	68.6455	68.6455	19.6532	29.2696	19.1879	28.88	28.2632	25.0508	0.286299	0.426387	0.279521	0.420712	0.411726	0.364929
387196	Akr1b10	4	+	63057737	63057761	24	63057739	3		protein_coding	XR_001837481.2	789	0.00310953	0.0034237	0.004943	0.0129612	0.00319338	0.0034237	0.148606	0.16962	0.190735	0.37401	0.157367	0.16962	12	4.78918	4.15654	3.62797	3.64096	2.97118	3.83717	146.451	146.451	146.451	146.451	146.451	28.9708	34.6373	35.9132	34.2027	32.5631	33.2574	0.197818	0.23651	0.245223	0.233543	0.222348	0.227088
316388	LOC102548069	20	+	8644913	8644924	11	8644917	1		lncRNA		250	0.000768712	0.00642907	0.00834591	0.00956074	0.00253593	0.00642907	0.0635729	0.244679	0.26164	0.319937	0.134791	0.244679	12	10.5339	8.87122	9.02228	10.2269	8.67646	9.46616	45.1234	45.1234	45.1234	45.1234	45.1234	14.0948	19.0626	19.3676	14.9457	18.9377	17.2817	0.31236	0.422455	0.429215	0.331218	0.419686	0.382987
61230	Wbp1l	1	+	245528621	245528631	10	245528625	3	mPAS	protein_coding	NM_001313908.1	2031	0.00423494	0.00332448	0.00215093	0.013124	0.00488474	0.00423494	0.179798	0.16705	0.116342	0.375815	0.20465	0.179798	12	6.28178	5.95014	4.15806	4.90073	6.0109	5.46032	370.688	370.688	370.688	370.688	370.688	51.3088	64.9113	99.1478	97.0014	62.4459	74.963	0.138415	0.175111	0.26747	0.26168	0.16846	0.202227
273393	LOC365784	2	-	128740774	128740776	2	128740775	1	mPAS			176	0.00198707	0.00630957	0.00366822	0.00871366	0.00705625	0.00630957	0.112484	0.242876	0.159359	0.305093	0.258305	0.242876	12	4.75134	6.6849	5.43135	4.92986	6.63368	5.68623	35.2294	35.2294	35.2294	35.2294	35.2294	24.7889	21.4712	26.7871	25.4367	21.2873	23.9542	0.70364	0.609469	0.76036	0.722028	0.604248	0.679949
218802	LOC688682	17	-	56372085	56372109	24	56372097	1	mPAS	protein_coding	XM_039096346.1	23005	0.00563273	0.00553155	0.00297241	0.0100248	0.00364758	0.00553155	0.211418	0.226373	0.141947	0.328204	0.170347	0.211418	12	4.81463	6.02702	6.22902	6.3389	6.33791	5.9495	4502.87	4502.87	4502.87	4502.87	4502.87	2059.56	1470.07	1293.91	1221.09	1205.11	1449.95	0.457387	0.326475	0.287352	0.271181	0.267631	0.322005
531199	LOC102553059	8	+	119030122	119030126	4	119030123	1	mPAS	pseudogene		184	0.00271026	0.0153797	0.00227789	0.00495572	0.00266009	0.00271026	0.134694	0.419857	0.120164	0.222547	0.138486	0.138486	12	6.05245	5.88439	5.43333	5.90826	6.01531	5.85875	39.6659	39.6659	39.6659	39.6659	39.6659	23.2257	25.8615	32.4552	25.4547	23.8359	26.1666	0.585533	0.651982	0.818214	0.641728	0.600917	0.659675
468828	LOC691978	6	+	140762774	140762779	5	140762776	3		pseudogene		62	0.00423125	0.00528009	0.0043354	0.0056845	0.00867407	0.00528009	0.179798	0.220052	0.174057	0.241664	0.294612	0.220052	12	10.787	11.8267	10.8915	0.254757	10.2837	8.80871	10.4883	10.4883	10.4883	10.4883	10.4883	12.6225	10.0255	12.5972	8.02114	12.6694	11.1871	1.20348	0.955874	1.20107	0.764769	1.20795	1.06663
405939	Cntfr	5	-	56823445	56823451	6	56823448	1	mPAS	protein_coding	XM_017593357.2	304	0.00211082	0.00665587	0.00240894	0.0115581	0.00563048	0.00563048	0.11595	0.250736	0.125602	0.35321	0.225152	0.225152	12	4.32091	3.52278	6.20073	4.34638	5.13733	4.70563	55.4366	55.4366	55.4366	55.4366	55.4366	44.8441	43.2946	20.5829	44.1433	39.0401	38.381	0.808927	0.780975	0.371287	0.796285	0.704229	0.692341
522539	Exph5	8	+	53775476	53775478	2	53775476	3		protein_coding		154	0.00455667	0.011977	0.0040004	0.00707362	0.000798225	0.00455667	0.187443	0.3632	0.166502	0.273614	0.0688838	0.187443	12	8.83881	8.49814	8.94372	8.23934	8.32222	8.56844	28.4528	28.4528	28.4528	28.4528	28.4528	12.1362	12.6823	12.0488	13.6039	13.7522	12.8447	0.42654	0.445731	0.423466	0.478121	0.483336	0.451439
356825	Asxl1	3	+	141881501	141881531	30	141881522	5	mPAS	protein_coding		1487	0.00234999	0.021459	0.000620551	0.00147791	0.00265408	0.00234999	0.12321	0.513158	0.0548162	0.106668	0.138486	0.12321	12	0.500458	10.9804	0.106321	0.268884	10.84	4.53921	280.422	280.422	280.422	280.422	280.422	39.4523	57.7613	47.2897	44.265	57.9013	49.3339	0.140689	0.20598	0.168638	0.157851	0.206479	0.175928
231664	Lyst	17	+	86443481	86443532	51	86443489	1	mPAS	protein_coding		1490	0.00225184	0.00828414	0.00253824	0.0137232	0.00181854	0.00253824	0.120593	0.289416	0.128765	0.386354	0.109083	0.128765	12	1.66901	0.545171	2.28783	1.14948	1.07188	1.34467	269.147	269.147	269.147	269.147	269.147	98.3917	101.814	81.6333	104.912	101.864	97.723	0.365569	0.378285	0.303304	0.389795	0.378469	0.363084
116830	Zdhhc8	11	+	82767732	82767758	26	82767752	1		protein_coding		1856	0.00114874	0.00494313	0.00202297	0.0180258	0.00248427	0.00248427	0.0789622	0.211562	0.111964	0.451427	0.132753	0.132753	12	0.35092	0.175558	0.380564	11.33	0.424386	2.53228	340.675	340.675	340.675	340.675	340.675	67.3482	72.254	66.5	87.265	65.1074	71.6949	0.19769	0.212091	0.195201	0.256153	0.191113	0.21045
567017	Pnck	X	-	151369402	151369451	49	151369409	1		protein_coding		8972	0.00356166	0.00641492	0.00449397	0.00750789	0.00686264	0.00641492	0.161175	0.244679	0.178841	0.282899	0.254005	0.244679	12	6.91418	6.72838	6.91213	6.19861	6.48771	6.6482	1660.82	1660.82	1660.82	1660.82	1660.82	236.781	251.353	236.252	275.787	264.343	252.903	0.142569	0.151343	0.14225	0.166055	0.159165	0.152276
131286	RGD1306556	12	+	43551913	43551916	3	43551914	3		protein_coding		75	0.00342718	0.0156332	0.00285772	0.00312416	0.00389544	0.00342718	0.157735	0.423604	0.139021	0.167071	0.176473	0.167071	12	4.08826	3.01984	2.01046	3.98513	2.19911	3.06056	12.2378	12.2378	12.2378	12.2378	12.2378	8.29132	13.9565	16.9668	9.31858	16.8113	13.0689	0.677519	1.14045	1.38643	0.761461	1.37372	1.06792
10520	-	1	-	88938871	88938871	0	88938871				-	61	0.00832282	0.00578596	0.00578545	0.00420676	0.00492698	0.00578545	0.265369	0.232001	0.211425	0.201196	0.205606	0.211425	12	9.57115	10.6721	10.6957	10.9145	9.45433	10.2615	11.9808	11.9808	11.9808	11.9808	11.9808	14.9155	13.6149	13.5328	13.1343	14.9466	14.0288	1.24496	1.13639	1.12954	1.09628	1.24755	1.17094
145471	-	13	+	41903302	41903305	3	41903302				-	55	0.00309584	0.0129022	0.00527805	0.00182786	0.00596579	0.00527805	0.148318	0.378889	0.197906	0.118223	0.233328	0.197906	12	10.1072	10.7929	10.8794	9.71024	9.50424	10.1988	10.7355	10.7355	10.7355	10.7355	10.7355	15.6855	13.5715	13.3795	16.1957	15.5036	14.8672	1.46109	1.26418	1.24629	1.50862	1.44415	1.38487
195957	Nrg3	16	-	15060906	15060908	2	15060908	12		protein_coding		1080	0.00656707	0.0111078	0.00267931	0.00146273	0.00726209	0.00656707	0.232239	0.348435	0.133156	0.105813	0.264778	0.232239	12	0.0228461	10.0501	10.2868	11.9609	8.84762	8.23367	183.157	183.157	183.157	183.157	183.157	32.1423	94.7118	93.7127	35.0934	94.4328	70.0186	0.175491	0.517107	0.511652	0.191603	0.515584	0.382287
405697	Aptx	5	-	55801645	55801654	9	55801650	3		protein_coding		245	0.0026558	0.00105057	0.00356642	0.0124646	0.00949254	0.00356642	0.132672	0.0878879	0.156607	0.368222	0.30698	0.156607	12	5.75876	6.35041	5.68806	6.44808	6.26287	6.10164	43.4379	43.4379	43.4379	43.4379	43.4379	31.58	27.8001	31.8754	26.6658	28.3142	29.2471	0.727015	0.639995	0.733815	0.613883	0.65183	0.673307
219795	Ankrd16	17	-	66739066	66739066	0	66739066	1		protein_coding		57	0.00200621	0.00772488	0.00136673	0.0103434	0.00787587	0.00772488	0.112763	0.27751	0.086633	0.333138	0.277601	0.27751	12	9.97655	10.7271	9.17565	10.0691	10.1709	10.0239	12.1025	12.1025	12.1025	12.1025	12.1025	13.6682	12.4425	13.0488	13.2114	13.2961	13.1334	1.12936	1.02809	1.07819	1.09162	1.09862	1.08518
546917	-	9	+	30631827	30631828	1	30631828				-	177	0.0037027	0.00447209	0.00417871	0.0106725	0.00630313	0.00447209	0.165849	0.200594	0.17057	0.339607	0.240986	0.200594	12	0.299388	0.211173	11.1848	0.141913	9.22747	4.21295	35.5739	35.5739	35.5739	35.5739	35.5739	19.6989	20.7943	31.3186	21.825	28.4939	24.4261	0.553746	0.58454	0.880382	0.613511	0.800978	0.686631
265185	-	2	-	31282663	31282663	0	31282663				-	98	0.00311185	0.0051356	0.00150487	0.0071256	0.0124594	0.0051356	0.148606	0.216053	0.0926164	0.274288	0.359049	0.216053	12	10.4827	9.16335	10.4838	10.0489	9.63719	9.96319	15.9727	15.9727	15.9727	15.9727	15.9727	8.2786	12.2679	8.37769	9.84602	11.1478	9.98361	0.518296	0.768055	0.5245	0.616427	0.697928	0.625041
253087	-	19	-	33904997	33905000	3	33905000				-	233	0.00526867	0.0133204	0.00441231	0.00396245	0.00237806	0.00441231	0.203911	0.384909	0.176546	0.193891	0.130207	0.193891	12	9.84804	9.43886	8.78504	10.4171	9.30152	9.55811	39.8743	39.8743	39.8743	39.8743	39.8743	24.4562	24.892	23.0574	22.4257	25.8103	24.1283	0.613332	0.624262	0.578252	0.562411	0.647292	0.60511
485771	Cs	7	+	791406	791439	33	791418	3	mPAS	protein_coding		5105	0.00403148	0.00883892	0.00217427	0.0102789	0.00413177	0.00413177	0.173479	0.299891	0.117063	0.332278	0.183258	0.183258	12	5.93685	4.23147	6.25671	4.05562	4.94168	5.08447	969.654	969.654	969.654	969.654	969.654	171.785	265.525	134.929	264.809	252.409	217.891	0.177161	0.273835	0.139151	0.273096	0.260308	0.22471
548052	Unc50	9	+	39672873	39672891	18	39672888	1		protein_coding		3430	0.00433453	0.00842432	0.00535802	0.00468694	0.00679828	0.00535802	0.181359	0.292413	0.199947	0.215379	0.252204	0.215379	12	11.2523	10.3674	0.247066	10.556	11.1956	8.72368	652.249	652.249	652.249	652.249	652.249	117.172	128.509	76.3946	131.562	118.646	114.457	0.179643	0.197025	0.117125	0.201706	0.181903	0.17548
487008	Brd4	7	+	11266464	11266467	3	11266464	7		protein_coding	XM_006241072.4	45	0.00390328	0.0142225	0.00492598	0.00624987	0.000404775	0.00492598	0.170504	0.400765	0.190309	0.256169	0.0455832	0.190309	12	9.74923	9.88736	8.84067	9.997	10.6051	9.81587	7.96668	7.96668	7.96668	7.96668	7.96668	10.222	9.86303	9.50638	9.83351	9.43467	9.77192	1.2831	1.23804	1.19327	1.23433	1.18427	1.2266
29862	Mrpl43	1	-	243867001	243867011	10	243867004	4		protein_coding		592	0.000665686	0.00174688	0.0026095	0.0135954	0.0112262	0.0026095	0.0582771	0.116668	0.131123	0.384461	0.336648	0.131123	12	4.59399	4.62649	6.32823	4.55106	4.77802	4.97556	111.06	111.06	111.06	111.06	111.06	38.9689	38.8618	27.0691	39.0731	40.3338	36.8613	0.350881	0.349917	0.243734	0.35182	0.363171	0.331905
576013	Slc25a5	X	+	116034950	116034973	23	116034969	1	mPAS	protein_coding		488	0.00237614	0.0085728	0.00455508	0.00739351	0.00697283	0.00697283	0.123496	0.296242	0.180594	0.281868	0.256886	0.256886	12	6.24537	5.8642	4.25316	6.20574	6.05704	5.7251	99.356	99.356	99.356	99.356	99.356	45.5571	54.3565	66.524	47.1092	50.1542	52.7402	0.458524	0.547088	0.669552	0.474146	0.504793	0.53082
116753	Comt	11	+	82587631	82587643	12	82587640	1	mPAS	protein_coding		2053	0.00331668	0.00913927	0.0082214	0.00768038	0.00189479	0.00768038	0.154894	0.307128	0.259788	0.286274	0.112053	0.259788	12	3.91775	4.54879	4.50367	3.06449	2.74766	3.75647	380.837	380.837	380.837	380.837	380.837	64.9647	54.044	57.8096	66.0029	67.1819	62.0006	0.170584	0.141908	0.151796	0.17331	0.176406	0.162801
282379	Ppp3ca	2	-	225231811	225231813	2	225231811	11		protein_coding	XM_039101742.1	39	0.00711764	0.00336599	0.00867775	0.0037262	0.00765013	0.00711764	0.242787	0.167808	0.269911	0.18694	0.274205	0.242787	12	8.22353	8.05867	6.29026	8.24832	7.33932	7.63202	7.40989	7.40989	7.40989	7.40989	7.40989	5.1969	5.7059	10.1024	5.26414	8.64703	6.98328	0.701346	0.770039	1.36337	0.710421	1.16696	0.942427
63648	Abat	10	-	6999900	6999986	86	6999913	5		protein_coding		1701	0.00757564	0.01367	0.00506253	0.00237813	0.00215189	0.00506253	0.249564	0.390045	0.193467	0.140116	0.121209	0.193467	12	3.6725	4.30198	2.38923	2.31267	3.27288	3.18985	320.37	320.37	320.37	320.37	320.37	57.5016	44.8399	66.72	66.4032	65.2206	60.1371	0.179485	0.139963	0.208259	0.20727	0.203579	0.187711
243112	Cystm1	18	+	28002200	28002215	15	28002204	2		protein_coding		1931	0.000276661	0.00537272	0.00151077	0.0223156	0.00142113	0.00151077	0.0337255	0.222453	0.0927999	0.516756	0.0960546	0.0960546	12	6.09389	6.34943	4.479	5.71568	6.52371	5.83234	364.126	364.126	364.126	364.126	364.126	68.6575	61.1892	80.8728	76.6333	56.5425	68.7791	0.188554	0.168044	0.222101	0.210458	0.155283	0.188888
407911	Fkbp15	5	-	75751590	75751605	15	75751595	2		protein_coding		498	0.00498441	0.00356108	0.00226246	0.0123028	0.00801543	0.00498441	0.198857	0.173213	0.119748	0.364458	0.279414	0.198857	12	4.3632	6.36859	5.78345	6.31577	4.94438	5.55508	88.8394	88.8394	88.8394	88.8394	88.8394	37.0187	24.5341	32.061	25.2938	37.8653	31.3546	0.416692	0.276162	0.360887	0.284713	0.426223	0.352935
532177	Stap2	9	-	827590	827590	0	827590	2		protein_coding		85	0.00207174	0.013185	0.00111479	0.0100523	0.00472433	0.00472433	0.114991	0.382107	0.0780105	0.328427	0.200041	0.200041	12	8.13292	8.33475	6.73503	8.06567	6.68014	7.5897	18.6881	18.6881	18.6881	18.6881	18.6881	13.3839	11.4965	18.5108	13.9142	18.3021	15.1215	0.716173	0.615178	0.99051	0.744547	0.979342	0.80915
158167	Kcnip4	14	-	61819627	61819628	1	61819627	11		protein_coding	XM_017599088.2	155	0.00690845	0.0112019	0.00285021	0.00375849	0.00647388	0.00647388	0.239249	0.350264	0.139021	0.18767	0.24446	0.239249	12	10.8189	10.0445	8.99671	10.58	11.6073	10.4095	27.1646	27.1646	27.1646	27.1646	27.1646	18.0993	20.2497	18.6756	18.6081	13.1056	17.7477	0.666282	0.745447	0.687499	0.685015	0.482453	0.653339
463946	Vash1	6	+	106342237	106342254	17	106342248	2		protein_coding		40	0.00333129	0.0081734	0.00335562	0.0120211	0.00434128	0.00434128	0.155322	0.288027	0.152671	0.36004	0.188898	0.188898	12	2.88356	4.81324	1.38247	0.953023	2.18019	2.4425	6.13613	6.13613	6.13613	6.13613	6.13613	7.17154	0.326282	8.15629	7.50447	8.49428	6.33057	1.16874	0.0531739	1.32922	1.223	1.3843	1.03169
101722	Kcnj6	11	-	34061697	34061709	12	34061707	4	mPAS	protein_coding		1569	0.00809565	0.00231249	0.00635913	0.00532914	0.00918439	0.00635913	0.260624	0.134996	0.224628	0.231306	0.303582	0.231306	12	8.74463	10.7272	9.07308	8.9175	9.89654	9.47179	282.191	282.191	282.191	282.191	282.191	71.347	63.9976	76.3265	76.9002	74.3212	72.5785	0.252833	0.226789	0.270478	0.272511	0.263372	0.257197
241221	Mapre2	18	+	15167955	15167958	3	15167957	6	mPAS	protein_coding		196	0.00316632	0.00309045	0.0026458	0.0181144	0.0043422	0.00316632	0.150079	0.159739	0.132111	0.451537	0.188898	0.159739	12	6.12207	5.53906	6.66597	5.19073	6.23016	5.9496	34.9791	34.9791	34.9791	34.9791	34.9791	21.5944	22.3936	18.8985	22.3995	21.1906	21.2953	0.617351	0.640199	0.540279	0.640369	0.605806	0.608801
223812	-	17	+	11962898	11962921	23	11962918				-	115	0.00545959	0.0133489	0.00381372	0.00785245	0.000897364	0.00545959	0.207393	0.385383	0.161915	0.289767	0.0723289	0.207393	12	8.10179	7.32586	6.83432	6.78582	7.01586	7.21273	20.3604	20.3604	20.3604	20.3604	20.3604	18.2698	19.0972	17.3948	17.1242	17.849	17.947	0.897321	0.937959	0.854345	0.841055	0.876656	0.881467
341222	Sptan1	3	+	13305994	13306053	59	13306046	1	mPAS	protein_coding		40460	0.00516494	0.0116784	0.00218459	0.0061296	0.00640028	0.0061296	0.202552	0.357293	0.117384	0.253131	0.242836	0.242836	12	4.52212	3.01962	3.32092	3.48534	2.81749	3.4331	7721.85	7721.85	7721.85	7721.85	7721.85	905.388	1097.3	1136.4	1079.78	1092.16	1062.21	0.11725	0.142104	0.147167	0.139834	0.141438	0.137559
382033	Rsbn1l	4	+	14167097	14167107	10	14167104	3		protein_coding		323	0.00256615	0.00602808	0.00343559	0.0183546	0.00124051	0.00343559	0.12956	0.23663	0.154102	0.455333	0.0875442	0.154102	12	0.822304	0.407553	10.8308	11.9775	10.8472	6.97706	61.6377	61.6377	61.6377	61.6377	61.6377	18.7779	21.0776	20.7576	22.5578	20.9287	20.8199	0.30465	0.34196	0.336767	0.365974	0.339545	0.337779
56824	-	1	+	205727943	205727949	6	205727947				-	166	0.0074205	0.00174959	0.00463804	0.00625247	0.011668	0.00625247	0.247852	0.116668	0.182969	0.256169	0.345011	0.247852	12	6.92561	6.94112	5.17194	6.53592	7.01299	6.51752	30.7306	30.7306	30.7306	30.7306	30.7306	13.443	13.6016	12.4189	14.1081	13.04	13.3223	0.437448	0.442608	0.404124	0.459091	0.424333	0.433521
421537	Xkr4	5	+	16297159	16297162	3	16297159	2		protein_coding	XM_039109398.1	66	0.00412114	0.0087837	0.00125391	0.00941488	0.00815853	0.00815853	0.176619	0.299617	0.0826151	0.316154	0.282541	0.282541	12	6.80716	6.84618	5.03613	6.64001	5.85033	6.23596	12.6488	12.6488	12.6488	12.6488	12.6488	10.9717	10.8332	12.4703	11.4253	13.1133	11.7627	0.867411	0.856467	0.985888	0.903271	1.03672	0.929952
254929	-	19	-	51872765	51872765	0	51872765				-	58	0.00307191	0.00741883	0.00997334	0.00661702	0.00469713	0.00661702	0.14781	0.270804	0.293534	0.262999	0.199688	0.262999	12	0.319668	0.300442	10.2587	10.1729	11.6667	6.5437	10.7639	10.7639	10.7639	10.7639	10.7639	5.3281	5.3936	9.75144	9.10136	7.74754	7.46441	0.494997	0.501082	0.905939	0.845545	0.719771	0.693467
389609	Malsu1	4	+	78059880	78059922	42	78059904	1	mPAS	protein_coding		2721	0.0061457	0.002944	0.00317848	0.00901987	0.0105164	0.0061457	0.223144	0.156342	0.147788	0.310435	0.322676	0.223144	12	5.03944	4.42146	4.70921	5.26243	4.40185	4.76688	512.878	512.878	512.878	512.878	512.878	158.371	158.214	159.292	154.072	160.928	158.175	0.308788	0.308483	0.310584	0.300406	0.313775	0.308407
224911	LOC102549787	17	+	19377434	19377434	0	19377434	1		lncRNA	XR_360903.4	159	0.00650377	0.00998384	0.00375767	0.00383625	0.00772552	0.00650377	0.231288	0.327082	0.161039	0.190022	0.275353	0.231288	12	11.3925	9.9908	9.08977	10.0433	10.2143	10.1461	29.1718	29.1718	29.1718	29.1718	29.1718	25.5831	33.1071	32.049	33.1067	34.3202	31.6332	0.876978	1.1349	1.09863	1.13489	1.17648	1.08437
363921	Pclo	4	-	19691435	19691448	13	19691446	5	mPAS	protein_coding	XM_039108289.1	625	0.00441344	0.0109084	0.0047152	0.00518566	0.00665446	0.00518566	0.183934	0.344695	0.185094	0.227382	0.249653	0.227382	12	8.276	8.09178	9.17454	10.0338	8.06919	8.72906	113.783	113.783	113.783	113.783	113.783	32.9751	33.0828	30.8989	21.918	33.6761	30.5102	0.289807	0.290754	0.271561	0.19263	0.295968	0.268144
470166	Cdc34	7	-	10017573	10017596	23	10017594	2	mPAS	protein_coding		3507	0.00389908	0.012264	0.0042413	0.00729138	0.00432575	0.00432575	0.170504	0.369092	0.172681	0.278308	0.188868	0.188868	12	2.8441	4.27401	2.37028	2.45853	2.82502	2.95439	678.15	678.15	678.15	678.15	678.15	130.14	94.7791	126.314	129.346	132.631	122.642	0.191905	0.139761	0.186263	0.190734	0.195577	0.180848
120426	Por	12	-	20951051	20951080	29	20951058	1	mPAS	protein_coding	NM_031576.2	4334	0.00469516	0.00999054	0.00770409	0.00167585	0.00796007	0.00770409	0.191651	0.327082	0.251663	0.112278	0.279015	0.251663	12	3.15582	2.88087	4.23432	2.76224	4.21525	3.4497	807.96	807.96	807.96	807.96	807.96	147.888	150.993	103.696	158.604	104.22	133.081	0.183039	0.186882	0.128344	0.196302	0.128992	0.164712
131107	Coro1c	12	+	42785158	42785185	27	42785178	2	mPAS	protein_coding	XM_039089710.1	10371	0.00399354	0.00721049	0.00319611	0.0167081	0.000966332	0.00399354	0.173221	0.26626	0.148173	0.431733	0.0752079	0.173221	12	4.72017	4.70564	2.73375	4.58845	3.9844	4.14648	1950.19	1950.19	1950.19	1950.19	1950.19	159.844	166.076	193.063	171.928	210.424	180.267	0.0819632	0.085159	0.0989974	0.0881598	0.107899	0.0924358
455358	Wdr35	6	+	31830607	31830638	31	31830607	5		protein_coding		50	0.00612432	0.00316791	0.00622143	0.00750966	0.00916247	0.00622143	0.223144	0.161741	0.221744	0.282899	0.303582	0.223144	12	1.28047	2.11659	2.60944	1.96929	2.31369	2.0579	10.6423	10.6423	10.6423	10.6423	10.6423	13.0223	14.5065	13.8614	14.2185	14.0522	13.9322	1.22364	1.36311	1.30249	1.33604	1.32042	1.30914
474775	Cand1	7	-	54690365	54690411	46	54690388	5		protein_coding		115	0.0133569	0.00529397	0.00587179	0.00172682	0.00593966	0.00587179	0.350849	0.220342	0.213353	0.114009	0.233328	0.220342	12	7.95575	8.02672	5.96979	5.79649	5.05089	6.55993	19.9635	19.9635	19.9635	19.9635	19.9635	12.4858	11.6753	23.9651	23.911	20.6962	18.5467	0.625434	0.58483	1.20045	1.19774	1.0367	0.92903
504477	Barx2	8	-	30251129	30251142	13	30251132	1	mPAS	protein_coding	XM_003750457.5	792	0.0060564	0.00345392	0.0029014	0.00348895	0.0163071	0.00348895	0.221582	0.170585	0.139431	0.179286	0.420346	0.179286	12	8.61791	6.86346	8.3584	8.47851	7.34127	7.93191	146.734	146.734	146.734	146.734	146.734	34.9275	34.0107	36.3294	34.9647	36.2614	35.2987	0.238033	0.231785	0.247588	0.238287	0.247124	0.240563
460503	-	6	+	82654918	82654918	0	82654918				-	75	0.00615532	0.00623694	0.00107919	0.00663632	0.0121761	0.00623694	0.223144	0.241457	0.0771888	0.263104	0.354424	0.241457	12	6.36847	4.91348	4.79532	6.42189	6.66592	5.83302	14.9454	14.9454	14.9454	14.9454	14.9454	12.6996	13.0316	12.8179	12.6861	11.6481	12.5767	0.849736	0.87195	0.857647	0.848828	0.779375	0.841507
170747	LOC100361879	14	+	77863697	77863712	15	77863709	2		protein_coding	XM_039092535.1	181	0.0042712	0.00712866	0.0119214	0.00312499	0.00625338	0.00625338	0.180329	0.26416	0.326737	0.167071	0.240713	0.240713	12	2.46568	1.51873	2.78912	1.43515	2.45676	2.13309	32.2354	32.2354	32.2354	32.2354	32.2354	26.4131	26.7662	23.9768	26.6785	26.4944	26.0658	0.819383	0.830336	0.743803	0.827615	0.821905	0.808609
205228	-	16	+	18785655	18785657	2	18785657				-	56	0.00221406	0.0153875	0.00506045	0.00818811	0.00191561	0.00506045	0.11974	0.419857	0.193467	0.294859	0.113074	0.193467	12	11.0535	10.691	10.637	11.366	10.9671	10.9429	9.19035	9.19035	9.19035	9.19035	9.19035	9.841	9.34073	9.36795	9.71405	9.67295	9.58734	1.0708	1.01636	1.01932	1.05698	1.05251	1.0432
524593	Ca12	8	+	67330419	67330431	12	67330423	1	mPAS	protein_coding	XM_006243311.4	1330	0.00213521	0.00228088	0.0109318	0.0108183	0.00665855	0.00665855	0.116508	0.13395	0.309892	0.342016	0.249653	0.249653	12	10.8126	8.89945	8.97959	10.0356	10.6421	9.87387	248.944	248.944	248.944	248.944	248.944	44.2326	49.2211	48.4616	50.0462	46.571	47.7065	0.177681	0.19772	0.194669	0.201034	0.187074	0.191636
101737	Kcnj6	11	-	34069597	34069605	8	34069604	4		protein_coding		32	0.00623664	0.00244717	0.00765667	0.0082699	0.0083132	0.00765667	0.224809	0.140787	0.250673	0.296085	0.285717	0.250673	12	8.59631	11.7694	11.2682	9.93228	11.7027	10.6538	5.62299	5.62299	5.62299	5.62299	5.62299	7.00111	3.68333	5.43894	8.22465	3.9099	5.65159	1.24509	0.655048	0.967269	1.46268	0.695342	1.00509
148698	Rabgap1l	13	+	73019196	73019243	47	73019239	5		protein_coding	XM_006250105.4	3857	0.00544689	0.00757932	0.00420124	0.00569857	0.0100682	0.00569857	0.207158	0.274326	0.171269	0.241938	0.315631	0.241938	12	9.96863	10.7058	10.5107	10.7226	9.93089	10.3677	712.053	712.053	712.053	712.053	712.053	419.086	407.058	417.434	395.424	434.284	414.657	0.58856	0.571669	0.58624	0.555329	0.609905	0.582341
17426	Arnt2	1	-	138237963	138237981	18	138237979	2		protein_coding		81	0.00772146	0.00768908	0.00174652	0.0105791	0.00534884	0.00768908	0.251554	0.276851	0.101845	0.337862	0.2185	0.251554	12	5.62784	5.96185	6.24773	6.30578	6.88145	6.20493	12.8031	12.8031	12.8031	12.8031	12.8031	12.8984	12.7406	12.4495	12.2019	10.7042	12.1989	1.00744	0.995114	0.972379	0.953039	0.836059	0.952807
36308	Zdhhc14	1	+	46341063	46341063	0	46341063	2		protein_coding		81	0.00708757	0.00173919	0.00892561	0.0128418	0.00261611	0.00708757	0.242359	0.116668	0.27483	0.373458	0.137605	0.242359	12	3.83212	2.91834	2.94325	3.96401	2.94418	3.32038	13.8578	13.8578	13.8578	13.8578	13.8578	10.0759	11.8268	11.377	9.56485	11.5678	10.8825	0.727093	0.85344	0.820987	0.690216	0.834753	0.785298
387483	-	4	+	65398764	65398765	1	65398764				-	105	0.00990331	0.00770748	0.00924637	0.00257155	0.00395714	0.00770748	0.297258	0.277199	0.281531	0.147676	0.178504	0.277199	12	9.75324	10.0046	9.75241	9.54639	9.11702	9.63473	16.1784	16.1784	16.1784	16.1784	16.1784	15.2128	14.9565	15.3595	15.975	16.6863	15.638	0.940318	0.924475	0.949386	0.987428	1.0314	0.966601
479003	Washc5	7	-	90884326	90884339	13	90884333	2	mPAS	protein_coding	XM_002729816.6	1052	0.00400085	0.00254624	0.00108423	0.0208358	0.00492445	0.00400085	0.173221	0.14405	0.0773754	0.497234	0.205606	0.173221	12	6.42462	5.55561	4.98474	5.65664	4.57085	5.43849	199.364	199.364	199.364	199.364	199.364	38.5996	52.0816	54.2586	50.816	54.8258	50.1163	0.193614	0.261239	0.272159	0.254891	0.275004	0.251381
132922	-	13	-	24256059	24256081	22	24256059				-	314	0.00234088	0.00717943	0.00288819	0.0144792	0.00658226	0.00658226	0.123078	0.265731	0.139276	0.399145	0.247669	0.247669	12	9.30335	10.6276	9.22943	10.7612	10.4782	10.08	57.481	57.481	57.481	57.481	57.481	47.5325	41.9105	47.7293	39.5106	44.7606	44.2887	0.826926	0.729119	0.83035	0.687369	0.778703	0.770493
402566	Penk	5	-	17183789	17183838	49	17183805	1	mPAS	protein_coding		14940	0.00217782	0.00177336	0.00443226	0.0139233	0.0112047	0.00443226	0.118224	0.116668	0.17705	0.389228	0.336648	0.17705	12	5.079	6.12731	5.59066	4.48959	5.84844	5.427	2773.85	2773.85	2773.85	2773.85	2773.85	1132.88	824.916	1026.01	1174.44	940.156	1019.68	0.408416	0.29739	0.369886	0.423397	0.338936	0.367605
310277	-	20	-	12740646	12740689	43	12740666				-	50	0.00516919	0.00499498	0.00673624	0.00597588	0.0106505	0.00597588	0.202552	0.212925	0.231996	0.250034	0.325449	0.231996	12	8.32573	10.1916	8.31925	10.1844	9.43602	9.2914	7.45342	7.45342	7.45342	7.45342	7.45342	5.73113	11.2583	5.81195	11.3602	10.7098	8.97429	0.768927	1.51049	0.77977	1.52416	1.4369	1.20405
203013	Zmiz1	16	+	1232593	1232623	30	1232600	3	mPAS	protein_coding	NM_001108393.1	4648	0.003798	0.00128142	0.00526572	0.00800369	0.0151861	0.00526572	0.168219	0.0966601	0.197898	0.292229	0.403061	0.197898	12	6.07909	4.8649	6.06727	6.38421	6.45903	5.9709	866.565	866.565	866.565	866.565	866.565	160.019	185.786	160.716	142.859	134.788	156.834	0.184659	0.214393	0.185463	0.164857	0.155542	0.180983
202663	Myo16	16	-	79263803	79263811	8	79263811	4		protein_coding		91	0.00526917	0.00267791	0.0188759	0.00469332	0.00203415	0.00469332	0.203911	0.147648	0.426697	0.215379	0.11788	0.203911	12	9.91541	11.7468	11.7211	9.21158	10.2285	10.5647	15.3736	15.3736	15.3736	15.3736	15.3736	14.0337	6.67984	6.86835	13.7871	14.39	11.1518	0.912848	0.434501	0.446763	0.896805	0.936019	0.725387
173239	Mtif2	14	+	103285724	103285736	12	103285733	1	mPAS	protein_coding	XM_039092118.1	717	0.00488214	0.00249526	0.00449064	0.0109268	0.0109642	0.00488214	0.196256	0.142265	0.178841	0.342899	0.33241	0.196256	12	2.74689	2.02251	2.19959	3.47902	1.50484	2.39057	132.144	132.144	132.144	132.144	132.144	26.9475	25.545	26.5277	23.6158	23.9365	25.3145	0.203925	0.193311	0.200748	0.178712	0.181139	0.191567
98118	Tbcd	10	+	106874123	106874133	10	106874125	2	mPAS	protein_coding	XM_039084996.1	2516	0.00251024	0.00310354	0.00110411	0.0213773	0.00567154	0.00310354	0.128164	0.159739	0.0780105	0.504367	0.225703	0.159739	12	6.38985	4.96503	4.5494	6.38159	6.33692	5.72456	462.118	462.118	462.118	462.118	462.118	65.3993	101.349	103.092	65.4892	67.0469	80.4753	0.141521	0.219315	0.223085	0.141715	0.145086	0.174144
318002	Lrrtm3	20	+	24688285	24688333	48	24688330	3		protein_coding		206	0.00120104	0.0229738	0.00379775	0.00183461	0.00402607	0.00379775	0.0803023	0.531764	0.161453	0.118418	0.180079	0.161453	12	4.00213	2.93111	2.73052	2.38871	2.46732	2.90396	38.4151	38.4151	38.4151	38.4151	38.4151	12.9327	20.5596	22.4856	23.3055	22.8106	20.4188	0.336658	0.535196	0.585333	0.606675	0.593794	0.531531
208758	-	16	+	49228774	49228783	9	49228780				-	80	0.00387067	0.0127263	0.0075968	0.00817395	0.00156715	0.0075968	0.170247	0.377193	0.250261	0.294859	0.100555	0.250261	12	10.6134	10.5704	9.22965	9.75799	9.63728	9.96173	13.8845	13.8845	13.8845	13.8845	13.8845	8.5307	8.76006	11.4256	11.0394	11.7485	10.3009	0.614405	0.630925	0.822904	0.795092	0.846162	0.741897
95220	Nmt1	10	+	88025382	88025410	28	88025402	4	mPAS	protein_coding		1275	0.00395335	0.00177431	0.00964803	0.0152982	0.00331481	0.00395335	0.171982	0.116668	0.289049	0.410366	0.160715	0.171982	12	3.43613	3.0761	3.17012	4.56148	2.95	3.43877	234.168	234.168	234.168	234.168	234.168	47.8219	45.7377	44.3343	37.427	43.6603	43.7962	0.20422	0.19532	0.189327	0.159829	0.186448	0.187029
304332	-	2	+	208471110	208471111	1	208471111				-	82	0.00627981	0.00492692	0.00606008	0.00909669	0.00788935	0.00627981	0.225853	0.211438	0.217458	0.310435	0.277763	0.225853	12	10.675	10.7242	10.221	9.95374	10.0404	10.3229	15.9379	15.9379	15.9379	15.9379	15.9379	10.4066	10.3931	11.7462	12.859	11.7143	11.4239	0.65295	0.6521	0.737001	0.806823	0.734997	0.716774
100497	App	11	-	24102315	24102341	26	24102318	7		protein_coding		234	0.0114202	0.00136466	0.00759536	0.00486864	0.00908425	0.00759536	0.324102	0.101243	0.250261	0.220574	0.30251	0.250261	12	6.34887	6.79402	6.71972	6.67507	5.07886	6.32331	39.4769	39.4769	39.4769	39.4769	39.4769	17.5386	15.8174	15.785	15.9327	18.5407	16.7229	0.444276	0.400674	0.399853	0.403595	0.46966	0.423612
309246	Ilrun	20	-	5809914	5809980	66	5809941	2	mPAS	protein_coding	XM_008772799.2	21597	0.0142864	0.00272074	0.00755645	0.00657416	0.00327293	0.00657416	0.36718	0.149075	0.249795	0.262838	0.15966	0.249795	12	0.810462	0.787893	1.73876	1.38203	0.236279	0.991084	4065.18	4065.18	4065.18	4065.18	4065.18	449.222	437.953	341.815	397.75	456.032	416.554	0.110505	0.107733	0.0840835	0.0978431	0.11218	0.102469
512468	Dipk2a	8	-	95070756	95070770	14	95070767	1		protein_coding		1525	0.00309649	0.00660466	0.00968911	0.00255746	0.0125366	0.00660466	0.148318	0.249399	0.289461	0.147133	0.359669	0.249399	12	8.27399	7.12507	8.46182	7.51865	6.70979	7.61786	288.176	288.176	288.176	288.176	288.176	55.7654	61.3071	55.8749	64.0623	57.004	58.8028	0.193511	0.212742	0.193891	0.222302	0.197809	0.204051
72185	-	10	-	58336911	58336913	2	58336913				-	160	0.00532314	0.008754	0.0123922	0.00382359	0.00420663	0.00532314	0.20441	0.299135	0.334926	0.190022	0.185284	0.20441	12	9.53515	10.5027	10.0476	10.6043	9.78875	10.0957	30.4984	30.4984	30.4984	30.4984	30.4984	20.4363	20.9168	21.1017	21.368	21.5651	21.0776	0.670078	0.685833	0.691895	0.700627	0.70709	0.691105
450321	Begain	6	-	127943645	127943659	14	127943656	1	mPAS	protein_coding	XM_039112982.1	3883	0.0053344	0.00645574	0.00879811	0.00195429	0.0120199	0.00645574	0.204595	0.245233	0.272687	0.124373	0.351161	0.245233	12	3.11441	4.73413	4.63694	3.8854	3.25123	3.92442	728.546	728.546	728.546	728.546	728.546	132.242	117.243	124.254	142.097	135.03	130.173	0.181516	0.160928	0.170551	0.195041	0.185341	0.178675
472405	-	7	-	29961787	29961791	4	29961791				-	122	0.0029045	0.0135819	0.00991833	0.00664261	0.00167363	0.00664261	0.141623	0.389206	0.292214	0.263104	0.10395	0.263104	12	10.5526	8.64649	8.88945	10.5388	9.73816	9.67309	20.5651	20.5651	20.5651	20.5651	20.5651	12.8789	15.285	16.3718	12.9292	16.9158	14.8761	0.62625	0.743248	0.796096	0.628695	0.822549	0.723368
364573	Slc25a40	4	-	25631485	25631503	18	25631502	2	mPAS	protein_coding		35	0.00489949	0.0134346	0.0019964	0.00885414	0.00557884	0.00557884	0.196704	0.38635	0.111033	0.307841	0.223696	0.223696	12	0.729651	2.93097	1.53719	1.28557	0.00330207	1.29734	6.42728	6.42728	6.42728	6.42728	6.42728	6.69611	7.59267	8.56402	7.71677	4.22257	6.95843	1.04183	1.18132	1.33245	1.20063	0.656976	1.08264
116967	LOC100360584	11	+	83406852	83406859	7	83406855	1		pseudogene		283	0.00746988	0.00733647	0.00302081	0.0122517	0.004839	0.00733647	0.248422	0.268637	0.143065	0.363963	0.203002	0.248422	12	5.11503	5.40559	4.19739	4.23742	5.8063	4.95234	53.8653	53.8653	53.8653	53.8653	53.8653	37.5494	34.5261	40.3215	38.8337	29.809	36.208	0.697099	0.640972	0.748562	0.720941	0.553399	0.672195
39507	Irf2bp1	1	+	78655194	78655202	8	78655200	3		protein_coding	NM_001107483.1	59	0.00692886	0.00428687	0.00430749	0.00355128	0.015875	0.00430749	0.239695	0.19504	0.173647	0.1819	0.412555	0.19504	12	8.4122	8.04161	8.51614	7.03125	8.40625	8.08149	9.26484	9.26484	9.26484	9.26484	9.26484	8.12854	9.2539	7.74704	11.0829	7.96699	8.83588	0.877353	0.998819	0.836176	1.19624	0.859916	0.9537
470050	Cfd	7	-	9813145	9813150	5	9813149	1	mPAS	protein_coding	NM_001077642.1	61	0.00334466	0.0115457	0.00312852	0.0147128	0.00228645	0.00334466	0.15548	0.355287	0.146535	0.400716	0.127062	0.15548	12	1.85676	0.918426	1.96168	2.81275	1.65816	1.84156	12.1718	12.1718	12.1718	12.1718	12.1718	17.7809	17.2533	17.8228	16.0518	18.1373	17.4092	1.46082	1.41748	1.46427	1.31877	1.49011	1.43029
63759	Rbfox1	10	-	8153166	8153180	14	8153174	16		protein_coding	XM_039085816.1	998	0.00518546	0.00752039	0.00382296	0.0126687	0.00595152	0.00595152	0.202552	0.273255	0.16209	0.371407	0.233328	0.233328	12	6.80969	5.42797	6.78978	6.82097	5.13297	6.19628	186.947	186.947	186.947	186.947	186.947	49.3067	59.5112	49.1317	49.3396	59.0444	53.2667	0.263748	0.318332	0.262811	0.263923	0.315835	0.28493
568320	Tbc1d25	X	+	14338269	14338302	33	14338273	1		protein_coding		1012	0.00615214	0.00697093	0.00522011	0.0141389	0.00284896	0.00615214	0.223144	0.25925	0.196649	0.393868	0.145457	0.223144	12	6.72452	5.16489	5.86924	6.78433	7.91278	6.49115	195.333	195.333	195.333	195.333	195.333	74.6689	85.4077	87.8001	74.6639	31.9834	70.9048	0.382265	0.437242	0.44949	0.382239	0.163738	0.362995
131543	-	12	+	44861113	44861114	1	44861114				-	832	0.0028474	0.0163449	0.00479849	0.00219698	0.00924805	0.00479849	0.13976	0.437292	0.186976	0.134172	0.304413	0.186976	12	4.82094	4.14687	4.17137	5.37183	4.09743	4.52169	159.926	159.926	159.926	159.926	159.926	80.4947	79.3156	84.264	69.6696	82.5389	79.2566	0.503323	0.495951	0.526893	0.435635	0.516106	0.495582
450494	Cinp	6	-	129887527	129887537	10	129887535	3		protein_coding		325	0.00517696	0.00279994	0.00893107	0.00889299	0.00966055	0.00889299	0.202552	0.151027	0.27483	0.307977	0.310087	0.27483	12	6.89292	6.8915	6.08288	6.67365	5.73294	6.45478	58.3397	58.3397	58.3397	58.3397	58.3397	12.9953	13.1264	15.2879	14.1632	15.4597	14.2065	0.222752	0.224999	0.26205	0.242772	0.264995	0.243513
11769	Abcc8	1	-	96598563	96598569	6	96598568	1		protein_coding		689	0.00688254	0.0050723	0.00290215	0.0166655	0.00412956	0.0050723	0.239134	0.214775	0.139431	0.431332	0.183258	0.214775	12	11.2776	0.859958	0.848733	11.1	0.529221	4.92311	130.019	130.019	130.019	130.019	130.019	41.6306	35.7623	35.7169	39.6662	38.9276	38.3407	0.320188	0.275053	0.274705	0.305079	0.299398	0.294885
568851	FAM120C	X	+	20477813	20477818	5	20477813	3	mPAS	protein_coding	XM_017602279.2	1039	0.00495445	0.0081747	0.00653449	0.00343739	0.0126131	0.00653449	0.198159	0.288027	0.227789	0.17721	0.359887	0.227789	12	2.53937	2.88105	4.46834	2.51058	3.29659	3.13918	200.671	200.671	200.671	200.671	200.671	60.3967	62.7454	45.183	64.0822	61.3617	58.7538	0.300974	0.312678	0.225159	0.31934	0.305782	0.292786
42537	Nomo1	1	+	96556215	96556284	69	96556280	1	mPAS	protein_coding		2677	0.00744286	0.00484553	0.00302285	0.006299	0.0141121	0.006299	0.248172	0.209645	0.143065	0.257118	0.383369	0.248172	12	4.88513	6.47502	5.61865	6.37479	6.21125	5.91297	498.344	498.344	498.344	498.344	498.344	99.4883	63.0501	89.5152	65.1975	71.2245	77.6951	0.199638	0.126519	0.179625	0.130828	0.142922	0.155906
538731	Trak2	9	-	60351116	60351185	69	60351184	3		protein_coding		181	0.0022767	0.0157625	0.00417657	0.00765529	0.00598399	0.00598399	0.121107	0.425371	0.17057	0.285931	0.233675	0.233675	12	8.71832	8.61839	10.0369	9.5519	8.24962	9.03503	32.2178	32.2178	32.2178	32.2178	32.2178	15.7711	14.1205	11.1792	12.7089	14.5912	13.6742	0.489515	0.438281	0.34699	0.394468	0.452893	0.42443
552783	Acsl3	9	+	80164617	80164661	44	80164636	3	mPAS	protein_coding		4324	0.00127669	0.00303593	0.00125312	0.0288377	0.00145244	0.00145244	0.0830814	0.158573	0.0826151	0.585176	0.0964	0.0964	12	0.267162	11.2987	0.3782	10.8195	11.3208	6.81687	814.739	814.739	814.739	814.739	814.739	125.886	133.6	122.312	124.58	133.154	127.906	0.154511	0.163979	0.150124	0.152908	0.163432	0.156991
325243	-	3	-	35224879	35224879	0	35224879				-	149	0.00755767	0.00554727	0.00663227	0.00613879	0.00998729	0.00663227	0.249489	0.226724	0.230187	0.253181	0.314748	0.249489	12	6.24154	8.03439	5.71467	5.9656	6.89909	6.57106	28.1765	28.1765	28.1765	28.1765	28.1765	20.3367	9.5015	20.6177	20.6979	18.0332	17.8374	0.721761	0.337214	0.731734	0.73458	0.640008	0.633059
56214	Rnaseh2c	1	+	202895670	202895680	10	202895672	1	mPAS	protein_coding	XM_002728856.6	3095	0.000890606	0.0091751	0.000144714	0.0247294	0.000968606	0.000968606	0.0688142	0.308006	0.0224179	0.546598	0.0752079	0.0752079	12	6.27488	6.47232	4.53434	5.97873	4.46504	5.54506	586.861	586.861	586.861	586.861	586.861	78.4098	71.581	94.35	86.9214	96.4325	85.5389	0.133609	0.121973	0.160771	0.148112	0.164319	0.145757
14431	LOC102555866	1	-	114688305	114688309	4	114688308	1	mPAS	lncRNA		102	0.00243307	0.00268266	0.0159514	0.00618631	0.00898123	0.00618631	0.125629	0.147648	0.388052	0.25448	0.301179	0.25448	12	4.92878	5.04469	6.16612	4.95548	6.40435	5.49988	19.2058	19.2058	19.2058	19.2058	19.2058	12.5231	13.2727	13.9051	12.4096	13.4536	13.1128	0.652046	0.691074	0.724004	0.646135	0.700494	0.682751
124454	Rfc3	12	+	1011749	1011792	43	1011777	1	mPAS	protein_coding		547	0.000859779	0.0301702	0.00187291	0.00105117	0.00240882	0.00187291	0.0680898	0.626716	0.106592	0.0865836	0.131438	0.106592	12	1.35828	2.41108	1.72051	2.54159	0.597119	1.72572	101.005	101.005	101.005	101.005	101.005	24.3459	20.3296	23.2273	19.0697	23.3332	22.0611	0.241036	0.201273	0.229961	0.188799	0.231011	0.218416
25355	LOC120097382	1	-	203131012	203131047	35	203131018	3		lncRNA		1157	0.00738441	0.0103845	0.00521604	0.0063863	0.00709322	0.00709322	0.24721	0.335827	0.196649	0.258686	0.259217	0.258686	12	8.33987	6.58108	7.41863	7.56453	8.36757	7.65434	205.882	205.882	205.882	205.882	205.882	44.9498	53.463	53.3059	54.392	45.601	50.3423	0.218328	0.259677	0.258915	0.26419	0.221491	0.24452
28571	Lipa	1	-	232024347	232024363	16	232024352	1	mPAS	protein_coding	XM_017588801.2	2739	0.00344886	0.00477524	0.00244258	0.018108	0.00778179	0.00477524	0.158274	0.208568	0.125602	0.451537	0.276737	0.208568	12	5.81356	5.62142	6.32369	4.22144	5.80301	5.55662	523.462	523.462	523.462	523.462	523.462	98.3349	105.483	76.5317	120.923	98.5657	99.9676	0.187855	0.20151	0.146203	0.231005	0.188296	0.190974
119121	Ap5z1	12	-	12094725	12094751	26	12094729	3		protein_coding		340	0.00509366	0.0106081	0.00807027	0.00501071	0.0078252	0.0078252	0.200694	0.339666	0.256801	0.222864	0.277473	0.256801	12	4.44984	4.28244	2.80667	3.07462	2.92686	3.50809	60.4647	60.4647	60.4647	60.4647	60.4647	26.5381	30.8794	43.4705	41.408	41.9618	36.8516	0.438903	0.510702	0.71894	0.68483	0.693989	0.609473
496158	Grina	7	+	107965333	107965385	52	107965367	1	mPAS	protein_coding		32403	0.00563879	0.00475954	0.00389366	0.0166852	0.0057313	0.00563879	0.211418	0.208545	0.164082	0.431492	0.227227	0.211418	12	6.28374	4.67357	6.23474	5.1482	4.55155	5.37836	6029.37	6029.37	6029.37	6029.37	6029.37	690.177	1088.14	713.713	1058.67	1103.92	930.923	0.114469	0.180473	0.118373	0.175585	0.18309	0.154398
66706	Tenm2	10	-	20480886	20480892	6	20480890	8		protein_coding	XM_039085065.1	316	0.0066981	0.0080728	0.00798204	0.00469998	0.00925924	0.00798204	0.234627	0.286445	0.256008	0.215379	0.304413	0.256008	12	10.867	10.5599	0.270877	0.106197	11.1867	6.59814	61.167	61.167	61.167	61.167	61.167	35.6106	33.9993	29.5382	31.1871	35.4881	33.1647	0.582185	0.555843	0.482911	0.509868	0.580183	0.542198
341996	St6galnac4	3	+	15885242	15885249	7	15885243	1	mPAS	protein_coding		338	0.00613519	0.00298485	0.00786273	0.0106071	0.00919628	0.00786273	0.223144	0.156937	0.254533	0.338201	0.303582	0.254533	12	3.35356	3.78832	4.20561	3.40068	5.6118	4.07199	59.2681	59.2681	59.2681	59.2681	59.2681	52.5536	55.328	55.8683	53.1486	36.5669	50.6931	0.886709	0.93352	0.942636	0.896749	0.616975	0.855318
402534	-	5	-	16815328	16815361	33	16815346				-	256	0.00639468	0.00589144	0.00584532	0.0165584	0.00213527	0.00589144	0.229464	0.235043	0.213018	0.429902	0.120658	0.229464	12	1.45386	1.15274	0.942206	0.242865	0.0356517	0.765465	46.4772	46.4772	46.4772	46.4772	46.4772	14.8911	17.6293	19.5776	22.4284	22.8531	19.4759	0.320395	0.379311	0.421231	0.482567	0.491704	0.419041
533718	Yipf3	9	-	14730284	14730322	38	14730290	2	mPAS	protein_coding		677	0.0151565	0.00650408	0.00348577	0.00449483	0.00750641	0.00650408	0.37633	0.24648	0.154946	0.209207	0.270992	0.24648	12	4.14722	5.81536	4.57486	3.29564	5.39978	4.64657	126.618	126.618	126.618	126.618	126.618	37.976	26.8959	37.4225	33.87	31.8158	33.596	0.299927	0.212419	0.295556	0.267498	0.251275	0.265335
373303	Podxl2	4	-	121319849	121319864	15	121319850	2		protein_coding		71	0.0093334	0.00333853	0.00413187	0.0120353	0.00833379	0.00833379	0.288608	0.167226	0.169529	0.36004	0.285806	0.285806	12	9.90385	8.9561	8.88197	10.3315	9.87759	9.59019	11.818	11.818	11.818	11.818	11.818	10.7646	10.1901	9.9738	10.3461	10.8774	10.4304	0.910862	0.862246	0.843948	0.875447	0.920403	0.882581
249218	Bean1	19	-	739552	739569	17	739566	1	mPAS	protein_coding		589	0.00708038	0.00202437	0.00409751	0.0025133	0.0214608	0.00409751	0.242359	0.125074	0.168594	0.145896	0.491017	0.168594	12	7.87991	6.12943	5.89749	6.24837	6.30661	6.49236	107.375	107.375	107.375	107.375	107.375	16.9826	27.361	26.9507	27.2708	27.2906	25.1711	0.158161	0.254817	0.250996	0.253977	0.254162	0.234423
303995	Plppr5	2	+	205719175	205719230	55	205719198	3		protein_coding		1163	0.00587325	0.0146536	0.00674935	0.00190216	0.00817172	0.00674935	0.217133	0.407869	0.231996	0.121543	0.28269	0.231996	12	11.8171	11.3808	0.307826	11.0092	11.2093	9.14485	219.297	219.297	219.297	219.297	219.297	52.6031	55.9985	45.3473	56.5582	55.5504	53.2115	0.239871	0.255354	0.206785	0.257906	0.25331	0.242645
500034	-	7	+	130730283	130730285	2	130730284				-	49	0.00474844	0.0146544	0.00554162	0.00476651	0.00800278	0.00554162	0.192834	0.407869	0.204872	0.217486	0.279357	0.217486	12	10.803	10.7985	10.1583	9.88364	10.7824	10.4852	8.47898	8.47898	8.47898	8.47898	8.47898	8.94774	8.78813	10.6509	10.2833	8.91008	9.51602	1.05529	1.03646	1.25615	1.2128	1.05084	1.12231
359030	-	3	+	155510859	155510862	3	155510860				-	87	0.00916558	0.00124937	0.00497867	0.0179173	0.00444379	0.00497867	0.284806	0.0952443	0.191742	0.449446	0.192689	0.192689	12	0.148606	10.1505	9.97756	10.3878	9.66743	8.06637	16.9665	16.9665	16.9665	16.9665	16.9665	6.14076	15.5521	15.4192	14.2005	15.6824	13.399	0.361935	0.916638	0.908803	0.836974	0.92432	0.789734
112507	Epha6	11	+	40255728	40255729	1	40255728	7		protein_coding		152	0.00966176	0.0044223	0.00709373	0.00986212	0.00672866	0.00709373	0.293105	0.199204	0.239146	0.325563	0.2508	0.2508	12	8.63418	10.603	9.57941	9.20407	10.4291	9.68995	28.0998	28.0998	28.0998	28.0998	28.0998	19.8918	15.8721	20.8166	20.2286	17.0015	18.7621	0.707898	0.564848	0.740811	0.719884	0.60504	0.667696
379981	-	4	-	177845807	177845810	3	177845807				-	71	0.00670848	0.0107407	0.0100238	0.000817891	0.00974808	0.00974808	0.234627	0.341434	0.294265	0.0763568	0.311752	0.294265	12	10.2875	10.6454	11.3642	10.5512	10.7016	10.71	11.3538	11.3538	11.3538	11.3538	11.3538	10.8623	11.0629	10.3811	10.8368	11.2581	10.8802	0.956712	0.974373	0.914331	0.954461	0.991573	0.95829
496500	Cyth4	7	+	110176723	110176735	12	110176725	1	mPAS	protein_coding		566	0.00121739	0.0291383	0.00235475	0.00316621	0.00217398	0.00235475	0.0806114	0.614678	0.123399	0.168424	0.122193	0.123399	12	6.19848	6.71925	6.16724	8.09827	6.24704	6.68606	104.995	104.995	104.995	104.995	104.995	31.1994	31.1548	31.2575	18.8588	31.5301	28.8001	0.297152	0.296727	0.297706	0.179617	0.300302	0.274301
530664	Clasp2	8	+	113859953	113859964	11	113859960	7	mPAS	protein_coding	XM_039080680.1	598	0.00427639	0.000792352	0.00511232	0.00812368	0.0201251	0.00511232	0.180329	0.0746668	0.194854	0.294838	0.47412	0.194854	12	8.72389	8.32483	7.78302	8.87625	7.76231	8.29406	110.569	110.569	110.569	110.569	110.569	27.2423	30.4063	31.6136	27.6472	31.4777	29.6774	0.246382	0.274999	0.285918	0.250045	0.284688	0.268406
158196	Pacrgl	14	-	62532018	62532031	13	62532024	1	mPAS	protein_coding		34	0.00689241	0.0119372	0.00870004	0.00501677	0.00598959	0.00689241	0.239215	0.363104	0.27034	0.222864	0.233675	0.239215	12	5.25134	7.96179	8.03687	4.02363	5.38745	6.13222	6.19019	6.19019	6.19019	6.19019	6.19019	7.74249	4.53263	4.12762	4.18395	8.11194	5.73972	1.25077	0.732229	0.666801	0.6759	1.31045	0.92723
205552	Cilp2	16	+	19539750	19539761	11	19539758	1	mPAS	protein_coding	XM_006252902.4	1128	0.00717892	0.00570823	0.00257992	0.0141992	0.00929485	0.00717892	0.243269	0.230358	0.130084	0.394165	0.304413	0.243269	12	6.22208	4.38003	4.39029	5.41137	4.66363	5.01348	210.087	210.087	210.087	210.087	210.087	47.2604	64.9113	65.9685	63.3421	68.1848	61.9334	0.224957	0.308974	0.314006	0.301504	0.324555	0.294799
153695	Bmp2k	14	-	12481193	12481196	3	12481196	4	mPAS	protein_coding	XM_039092658.1	234	0.00796483	0.00251237	0.00219065	0.0225618	0.00374676	0.00374676	0.257575	0.142729	0.117384	0.518815	0.172031	0.172031	12	5.95877	5.7224	6.67025	6.54768	4.98604	5.97703	43.7673	43.7673	43.7673	43.7673	43.7673	22.8215	23.6425	18.3675	19.0551	24.1711	21.6116	0.521429	0.540188	0.419662	0.435374	0.552265	0.493783
371082	Kdm3a	4	-	103637496	103637515	19	103637497	2		protein_coding		420	0.00620941	0.00208262	0.00303459	0.0198308	0.00783742	0.00620941	0.224183	0.127679	0.143319	0.480803	0.277473	0.224183	12	5.80696	4.80443	6.56917	4.70517	4.53023	5.28319	75.8954	75.8954	75.8954	75.8954	75.8954	48.3078	51.3027	36.9563	53.1217	49.8798	47.9137	0.636505	0.675966	0.486938	0.699933	0.657218	0.631312
132691	-	13	-	21486093	21486096	3	21486096				-	31	0.00735808	0.0107156	0.00775675	0.0081654	0.00501865	0.00775675	0.247009	0.341417	0.252602	0.294859	0.207983	0.252602	12	9.139	9.07032	11.0795	9.35974	9.88661	9.70704	4.98026	4.98026	4.98026	4.98026	4.98026	7.07104	7.02498	7.53087	7.6	8.06794	7.45897	1.41981	1.41057	1.51214	1.52603	1.61999	1.49771
239932	-	18	+	5920	5920	0	5920				-	42	0.00654543	0.00840402	0.00723119	0.00647388	0.010384	0.00723119	0.232024	0.292413	0.242061	0.260371	0.321141	0.260371	12	8.93309	10.4677	8.86718	11.3312	10.1381	9.94746	6.50713	6.50713	6.50713	6.50713	6.50713	7.67484	8.81443	7.6871	7.14906	9.28782	8.12265	1.17945	1.35458	1.18134	1.09865	1.42733	1.24827
448661	-	6	-	111703579	111703579	0	111703579				-	49	0.00607958	0.00873759	0.00465452	0.00704281	0.0125658	0.00704281	0.222174	0.299135	0.183391	0.273087	0.359669	0.273087	12	6.87292	7.99631	5.88584	5.00555	6.97843	6.54781	10.4534	10.4534	10.4534	10.4534	10.4534	12.4016	6.94928	13.8563	12.0526	11.9929	11.4505	1.18637	0.664788	1.32553	1.15298	1.14728	1.09539
257921	-	19	+	24314723	24314725	2	24314724				-	280	0.00655312	0.0127327	0.00288319	0.0102053	0.00677804	0.00677804	0.232024	0.377193	0.139276	0.331041	0.251895	0.251895	12	2.89801	3.72857	4.28856	4.78035	4.8464	4.10838	62.6635	62.6635	62.6635	62.6635	62.6635	36.3927	38.8441	37.9343	32.3288	32.819	35.6638	0.580764	0.619884	0.605366	0.515911	0.523734	0.569132
529421	Traip	8	+	108661614	108661645	31	108661639	1	mPAS	protein_coding		861	0.00452195	0.00779741	0.0171746	0.000742093	0.00901583	0.00779741	0.186984	0.279168	0.405511	0.072806	0.301708	0.279168	12	4.4038	2.96511	3.92327	3.93237	3.9737	3.83965	160.204	160.204	160.204	160.204	160.204	23.0059	35.916	29.5583	30.3128	28.9112	29.5408	0.143604	0.224189	0.184504	0.189214	0.180464	0.184395
424847	Tmem8b	5	+	57948403	57948424	21	57948405	3	mPAS	protein_coding	XM_006238139.4	6808	0.00667509	0.0117013	0.00329742	0.0154075	0.00243789	0.00667509	0.23444	0.35765	0.151105	0.411612	0.131755	0.23444	12	10.9599	11.5004	0.196321	11.3122	11.093	9.01237	1323.23	1323.23	1323.23	1323.23	1323.23	292.724	301.701	279.631	304.33	296.261	294.929	0.22122	0.228004	0.211325	0.229991	0.223893	0.222886
272101	Mecom	2	-	113436773	113436774	1	113436774	3		protein_coding	XM_039101970.1	53	0.00366615	0.00456915	0.00483647	0.00396942	0.0227066	0.00456915	0.164443	0.203983	0.187874	0.193934	0.507098	0.193934	12	0.344475	11.3906	0.390293	0.412247	0.382761	2.58407	9.24575	9.24575	9.24575	9.24575	9.24575	6.89387	9.63467	6.64812	6.52541	6.62335	7.26508	0.745625	1.04206	0.719046	0.705774	0.716366	0.785775
328423	Pde1a	3	-	64801589	64801589	0	64801589	2		protein_coding		149	0.00280333	0.00362563	0.00340854	0.00758407	0.0224407	0.00362563	0.138526	0.174983	0.153705	0.28469	0.503283	0.174983	12	8.24357	8.1794	6.97092	7.72675	7.09048	7.64222	28.7209	28.7209	28.7209	28.7209	28.7209	10.445	10.4978	15.2833	12.7875	14.5396	12.7107	0.363673	0.36551	0.532132	0.445234	0.506237	0.442557
423023	Coq3	5	+	35460576	35460620	44	35460613	1	mPAS	protein_coding		3080	0.00959664	0.0200163	0.00211817	0.00336546	0.0049237	0.0049237	0.292933	0.495447	0.115579	0.175208	0.205606	0.205606	12	10.8165	0.161212	10.5805	0.132075	10.2226	6.38258	569.649	569.649	569.649	569.649	569.649	134.352	87.9069	136.484	88.9633	135.44	116.629	0.23585	0.154318	0.239593	0.156172	0.23776	0.204738
215038	Ogn	17	-	15032067	15032100	33	15032070	2	mPAS	protein_coding		415	0.0107875	0.0101937	0.00550622	0.00148557	0.0120775	0.0101937	0.313168	0.332021	0.204277	0.106846	0.3522	0.313168	12	10.7819	10.5737	10.7693	10.5456	9.01582	10.3373	73.1717	73.1717	73.1717	73.1717	73.1717	30.1441	32.87	30.7213	33.0308	35.3903	32.4313	0.411965	0.449218	0.419852	0.451415	0.483662	0.443222
8590	Pou2f2	1	-	80683325	80683328	3	80683326	6		protein_coding		112	0.00531597	0.00880212	0.0102597	0.00244471	0.0133323	0.00880212	0.204382	0.299891	0.297754	0.143207	0.371725	0.297754	12	8.40373	6.39022	6.4573	8.35614	8.00188	7.52185	19.0983	19.0983	19.0983	19.0983	19.0983	7.8757	12.4579	12.5897	7.88461	9.93958	10.1495	0.412376	0.652302	0.659202	0.412843	0.520442	0.531433
249279	Cdh11	19	-	2214353	2214354	1	2214354	3		protein_coding		366	0.0188725	0.00309896	0.00796359	0.002086	0.00827593	0.00796359	0.426585	0.159739	0.255971	0.130862	0.285672	0.255971	12	9.78779	9.78419	10.6877	9.67611	9.80296	9.94776	66.0607	66.0607	66.0607	66.0607	66.0607	34.4849	33.4396	26.6105	35.5201	34.5247	32.9159	0.522018	0.506195	0.402819	0.537689	0.522621	0.498268
407262	Klf4	5	-	70278832	70278844	12	70278844	2	mPAS	protein_coding		108	0.00717384	0.00581723	0.00274703	0.0209604	0.00366601	0.00581723	0.243269	0.232667	0.135541	0.498607	0.170957	0.232667	12	11.5362	11.2541	11.3788	0.544032	0.384713	7.01958	19.6494	19.6494	19.6494	19.6494	19.6494	14.3785	13.9956	14.1434	13.0691	13.4676	13.8108	0.731753	0.712263	0.719788	0.665113	0.685393	0.702862
261797	Cpne7	19	+	51182662	51182681	19	51182676	1	mPAS	protein_coding		2952	0.00552012	0.00669645	0.00261561	0.00295259	0.0226155	0.00552012	0.208942	0.25137	0.131222	0.161109	0.505552	0.208942	12	6.3319	6.362	6.46866	4.78053	4.52118	5.69286	553.847	553.847	553.847	553.847	553.847	104.449	102.975	96.7345	147.69	144.276	119.225	0.188589	0.185926	0.174659	0.266662	0.260498	0.215267
40007	LOC103691054	1	+	80747155	80747157	2	80747155	1	mPAS	lncRNA	XR_005493774.1	37	0.00521723	0.00614404	0.015169	0.00548222	0.00843018	0.00614404	0.203542	0.239113	0.37887	0.235906	0.288488	0.239113	12	7.89407	3.71815	6.43068	5.61522	6.43177	6.01798	5.35854	5.35854	5.35854	5.35854	5.35854	2.09707	4.48759	6.17859	7.20062	6.17224	5.22722	0.391351	0.837464	1.15304	1.34376	1.15185	0.975493
509542	Plekho2	8	-	66078442	66078447	5	66078445	1		protein_coding		605	0.00307745	0.00455576	0.0040297	0.0252131	0.00361902	0.0040297	0.147853	0.203771	0.167283	0.552964	0.169279	0.169279	12	6.85742	5.41115	6.85319	6.88264	6.17379	6.43564	114.526	114.526	114.526	114.526	114.526	29.4636	35.086	29.4799	29.6679	34.518	31.6431	0.257265	0.306358	0.257408	0.259049	0.301398	0.276296
276838	Slc25a44	2	-	173871389	173871393	4	173871392	2		protein_coding		80	0.00901531	0.0150383	0.00764339	0.00279652	0.00608699	0.00764339	0.281532	0.414199	0.250496	0.156354	0.236314	0.250496	12	6.38596	6.27336	6.53378	5.11011	5.79611	6.01987	14.5342	14.5342	14.5342	14.5342	14.5342	16.6569	16.872	16.2231	15.5304	17.2088	16.4982	1.14605	1.16084	1.1162	1.06854	1.18402	1.13513
505448	Sorl1	8	-	42341693	42341704	11	42341698	7	mPAS	protein_coding		1784	0.00388667	0.00939216	0.00875003	0.00791342	0.010686	0.00875003	0.170247	0.313306	0.271627	0.290528	0.32599	0.290528	12	7.94809	8.0974	8.69877	8.429	6.73489	7.98163	331.217	331.217	331.217	331.217	331.217	69.3872	65.3383	60.702	60.7268	66.641	64.5591	0.209492	0.197268	0.18327	0.183345	0.201201	0.194915
218521	LOC120097757	17	-	53303016	53303020	4	53303019	1		lncRNA	XR_005495462.1	573	0.00817441	0.0144293	0.00346244	0.00601949	0.00858947	0.00817441	0.261952	0.405047	0.154943	0.251197	0.292678	0.261952	12	10.8865	10.4615	10.9696	10.4393	10.4304	10.6375	109.036	109.036	109.036	109.036	109.036	71.8114	72.709	72.2642	70.7785	75.3742	72.5875	0.658605	0.666837	0.662758	0.649132	0.691281	0.665722
3192	LOC120098984	1	-	29852043	29852050	7	29852050	1		lncRNA	XR_005497816.1	4934	0.00858406	0.00820901	0.00642172	0.00702549	0.0104488	0.00820901	0.271518	0.288193	0.225841	0.272896	0.321845	0.272896	12	10.6897	10.5052	10.724	0.032489	9.94784	8.37983	943.306	943.306	943.306	943.306	943.306	484.972	503.553	489.04	277.265	519.239	454.814	0.514119	0.533817	0.518432	0.293929	0.550447	0.482149
373650	Wnt7a	4	-	123863108	123863144	36	123863121	2	mPAS	protein_coding		1455	0.00804172	0.0176169	0.00334865	0.00427796	0.00744126	0.00744126	0.25927	0.460337	0.152671	0.203159	0.270071	0.25927	12	5.05363	6.04676	4.15678	3.72274	4.8763	4.77124	291.011	291.011	291.011	291.011	291.011	101.394	63.1347	115.494	109.188	104.708	98.7839	0.348421	0.21695	0.396873	0.375204	0.359806	0.339451
503292	Ecsit	8	-	20605581	20605608	27	20605601	1	mPAS	protein_coding		2117	0.00562416	0.00797667	0.00335542	0.0110968	0.0126852	0.00797667	0.211368	0.284304	0.152671	0.346171	0.361295	0.284304	12	6.17446	4.75079	6.2936	4.19483	6.03527	5.48979	400.802	400.802	400.802	400.802	400.802	55.5313	91.0983	50.7219	94.7244	61.1195	70.6391	0.138551	0.22729	0.126551	0.236337	0.152493	0.176244
474678	Rap1b	7	-	53423762	53423771	9	53423769	6		protein_coding		145	0.00552925	0.0106423	0.00486001	0.0104977	0.00932768	0.00932768	0.208984	0.339666	0.188449	0.336491	0.304413	0.304413	12	1.00509	1.83694	2.08428	1.81393	2.4014	1.82833	26.4522	26.4522	26.4522	26.4522	26.4522	17.1222	17.8731	17.6821	17.1697	16.2156	17.2125	0.647289	0.675676	0.668455	0.649083	0.613017	0.650704
77702	Lsm12	10	-	87118333	87118339	6	87118335	2	mPAS	protein_coding		509	0.0103926	0.00480871	0.00664967	0.00162286	0.0173842	0.00664967	0.306406	0.208906	0.230287	0.110122	0.435731	0.230287	12	5.20924	5.55766	4.99808	4.55138	5.38635	5.14054	94.2595	94.2595	94.2595	94.2595	94.2595	38.3316	36.6335	38.2079	36.3453	38.1316	37.53	0.406661	0.388646	0.405348	0.385587	0.404539	0.398156
415980	Arid1a	5	-	145909064	145909130	66	145909113	4		protein_coding		628	0.0139135	0.00476266	0.00721891	0.00542306	0.00965133	0.00721891	0.360401	0.208545	0.242061	0.233995	0.310087	0.242061	12	0.192523	10.7895	10.2591	11.8235	11.6117	8.93526	117.684	117.684	117.684	117.684	117.684	34.8055	59.2238	60.8431	43.443	48.1326	49.2896	0.295752	0.503243	0.517002	0.369148	0.408997	0.418829
72328	Pafah1b1	10	-	59536636	59536644	8	59536643	5	mPAS	protein_coding		1324	0.0129464	0.00157426	0.00888156	0.00765505	0.0102956	0.00888156	0.346075	0.109093	0.274091	0.285931	0.320232	0.285931	12	4.20945	4.46182	2.81376	2.92842	2.96916	3.47652	247.342	247.342	247.342	247.342	247.342	37.0001	36.2049	54.1122	53.4434	50.8399	46.3201	0.149591	0.146376	0.218775	0.216071	0.205545	0.187271
496933	Cacna1i	7	+	111885245	111885277	32	111885252	3		protein_coding		384	0.00960912	0.00851413	0.0112529	0.00612204	0.00585648	0.00851413	0.292933	0.295178	0.316247	0.253131	0.231036	0.292933	12	11.9782	9.80989	10.112	10.9571	9.02025	10.3755	62.065	62.065	62.065	62.065	62.065	20.447	43.0927	43.308	36.9698	41.0834	36.9802	0.329445	0.694315	0.697785	0.595663	0.661942	0.59583
287927	Ercc8	2	+	39684582	39684589	7	39684582	2		protein_coding		59	0.0122808	0.00437921	0.00416441	0.0118955	0.00873127	0.00873127	0.336817	0.198223	0.170424	0.358071	0.295757	0.295757	12	6.52258	4.5924	5.63625	6.60813	4.65438	5.60275	8.62086	8.62086	8.62086	8.62086	8.62086	8.39878	10.2182	10.4647	8.00119	10.3677	9.4901	0.97424	1.18528	1.21388	0.92812	1.20263	1.10083
346610	-	3	+	60851011	60851018	7	60851012				-	496	0.00871392	0.00516759	0.00795152	0.0154456	0.00424907	0.00795152	0.274532	0.217073	0.255842	0.41177	0.186636	0.255842	12	0.119855	0.131063	10.0519	10.7112	10.1269	6.22818	93.8249	93.8249	93.8249	93.8249	93.8249	22.8213	22.5416	44.64	41.1543	43.93	35.0174	0.243233	0.240252	0.47578	0.438629	0.468213	0.373221
386155	Irf5	4	+	58138982	58138992	10	58138989	2		protein_coding		94	0.00940855	0.00734253	0.0147491	0.00492871	0.00535293	0.00734253	0.290037	0.268637	0.371441	0.222547	0.2185	0.268637	12	9.59528	7.71275	8.40433	7.63317	8.40206	8.34952	17.1446	17.1446	17.1446	17.1446	17.1446	8.30809	14.2809	13.3366	14.1154	13.2893	12.6661	0.484589	0.832967	0.77789	0.823316	0.775128	0.738778
32473	Hivep2	1	+	8555962	8555999	37	8555988	2	mPAS	protein_coding		7484	0.0123882	0.0075844	0.011188	0.00494929	0.00579397	0.0075844	0.338856	0.274326	0.315055	0.222547	0.228855	0.274326	12	2.38451	2.29401	1.0961	1.53214	0.348164	1.53098	1434.23	1434.23	1434.23	1434.23	1434.23	132.426	138.553	210.491	190.709	216.297	177.695	0.0923328	0.0966046	0.146762	0.13297	0.150811	0.123896
265350	Rad17	2	-	31764257	31764281	24	31764261	1	mPAS	protein_coding		166	0.00896128	0.0048651	0.00827556	0.00725403	0.0126551	0.00827556	0.280654	0.20992	0.26098	0.277884	0.36076	0.277884	12	2.9368	2.86211	4.17813	3.16024	4.84302	3.59606	30.9724	30.9724	30.9724	30.9724	30.9724	13.6361	12.3753	14.0838	13.4786	11.799	13.0746	0.440267	0.39956	0.454722	0.435183	0.380951	0.422137
5651	Dact2	1	-	55181019	55181029	10	55181023	1	mPAS	protein_coding	XM_006227960.4	311	0.0151232	0.00865154	0.00175991	0.00998878	0.00656518	0.00865154	0.376092	0.297667	0.102361	0.32799	0.247319	0.297667	12	11.7821	10.9449	10.1418	10.9113	0.166876	8.78939	53.5164	53.5164	53.5164	53.5164	53.5164	25.8641	36.248	39.3597	38.4215	18.9722	31.7731	0.483294	0.677326	0.735471	0.717939	0.354512	0.593708
430113	Sgip1	5	+	117729125	117729130	5	117729125	8		protein_coding		87	0.00764786	0.0103463	0.00376773	0.0127079	0.00791621	0.00791621	0.250902	0.335389	0.161039	0.371499	0.278092	0.278092	12	5.10904	5.67526	6.82403	6.77347	6.7904	6.23444	16.7129	16.7129	16.7129	16.7129	16.7129	17.9227	18.2536	15.1668	15.4817	15.3527	16.4355	1.07239	1.09219	0.907492	0.926332	0.918616	0.983404
367042	Lrrc4	4	-	57434877	57434933	56	57434895	2		protein_coding	NM_001037336.1	1141	0.00670526	0.00141081	0.023327	0.0083302	0.00261717	0.00670526	0.234627	0.102595	0.484181	0.297239	0.137605	0.234627	12	10.5743	10.2783	10.3433	10.2694	11.4739	10.5878	206.332	206.332	206.332	206.332	206.332	50.3672	56.6929	52.9076	53.3398	37.0443	50.0704	0.244107	0.274765	0.256419	0.258514	0.179537	0.242668
398804	Iffo1	4	+	157962292	157962301	9	157962294	2	mPAS	protein_coding		3148	0.0081598	0.00371685	0.00636601	0.0181321	0.00635987	0.00636601	0.261952	0.178155	0.224628	0.451624	0.241881	0.241881	12	7.88268	8.13486	6.66721	7.53243	8.01969	7.64738	568.909	568.909	568.909	568.909	568.909	76.3586	64.1496	109.671	89.7176	72.237	82.4268	0.134219	0.112759	0.192774	0.157701	0.126975	0.144886
139151	Pbx1	13	-	80570090	80570109	19	80570091	7	mPAS	protein_coding		65	0.00964905	0.0133882	0.00919464	0.00255143	0.00800173	0.00919464	0.293105	0.386166	0.280225	0.147052	0.279357	0.280225	12	10.8906	10.0111	11.4774	9.04482	9.0267	10.0901	12.2585	12.2585	12.2585	12.2585	12.2585	14.4001	16.1897	11.4079	14.6756	14.9058	14.3158	1.1747	1.32069	0.930613	1.19718	1.21596	1.16783
566511	-	X	-	141121146	141121162	16	141121154				-	1006	0.00950207	0.011637	0.00656128	0.00582079	0.00930442	0.00930442	0.291271	0.35637	0.228222	0.245486	0.304413	0.291271	12	10.3341	9.01915	9.81988	11.4747	9.2212	9.97381	180.043	180.043	180.043	180.043	180.043	81.8113	82.9208	89.0007	49.8855	91.0676	78.9372	0.454399	0.460561	0.494331	0.277076	0.505811	0.438435
486552	Lsm7	7	+	8859093	8859118	25	8859112	1	mPAS	protein_coding		1041	0.00312399	0.00213819	0.00365389	0.0235336	0.0108524	0.00365389	0.148824	0.128847	0.159029	0.530416	0.3303	0.159029	12	4.82993	4.80735	6.79851	6.77511	5.72718	5.78761	192.801	192.801	192.801	192.801	192.801	112.109	112.282	99.7738	99.2324	122.927	109.265	0.581475	0.582374	0.517496	0.514688	0.637582	0.566723
347800	C1qtnf4	3	+	76870920	76870924	4	76870921	4		protein_coding		159	0.000792395	0.00628271	0.00483928	0.0253832	0.00600775	0.00600775	0.0642917	0.242553	0.187874	0.553583	0.233809	0.233809	12	3.95082	5.34128	4.54982	3.9319	4.41069	4.4369	30.4786	30.4786	30.4786	30.4786	30.4786	20.4481	15.0404	20.2581	20.9398	20.7711	19.4915	0.670898	0.493475	0.664667	0.687031	0.681499	0.639514
336136	Defb25	3	-	141099263	141099279	16	141099274	1		protein_coding		22	0.00943756	0.010723	0.011542	0.0063232	0.00545777	0.00943756	0.290134	0.341417	0.320964	0.257774	0.220793	0.290134	12	11.9206	9.60005	0.118604	7.90557	8.20745	7.55045	4.11889	4.11889	4.11889	4.11889	4.11889	3.38789	7.22228	2.71373	3.85897	4.83782	4.40414	0.822524	1.75345	0.65885	0.936896	1.17454	1.06925
91615	Mir632	10	+	65397974	65397984	10	65397976	2		miRNA		2468	0.00576607	0.0139939	0.00409066	0.000574979	0.0192599	0.00576607	0.214617	0.396435	0.168594	0.0621951	0.461717	0.214617	12	9.35061	9.2806	10.7043	9.56294	8.72251	9.52419	467.926	467.926	467.926	467.926	467.926	64.5143	63.1354	50.8225	68.441	57.9985	60.9823	0.137873	0.134926	0.108612	0.146264	0.123948	0.130325
313274	Fam184a	20	-	33004960	33004965	5	33004961	3		protein_coding		454	0.00458253	0.00263308	0.00812261	0.0232405	0.00510877	0.00510877	0.188153	0.146699	0.257692	0.527932	0.210427	0.210427	12	3.56193	4.02804	3.89303	4.20933	2.32345	3.60316	92.7322	92.7322	92.7322	92.7322	92.7322	35.552	27.9073	29.6564	24.1357	44.4948	32.3493	0.383384	0.300945	0.319807	0.260273	0.479821	0.348846
568495	-	X	+	15087001	15087036	35	15087030				-	853	0.00965074	0.00135881	0.0101997	0.00604262	0.0164469	0.00965074	0.293105	0.101243	0.296351	0.251831	0.421554	0.293105	12	8.65284	8.36999	8.53738	8.52368	8.83096	8.58297	154.629	154.629	154.629	154.629	154.629	33.3048	35.4996	34.8712	32.6309	31.862	33.6337	0.215385	0.22958	0.225515	0.211027	0.206055	0.217512
566876	Gabra3	X	-	150259645	150259663	18	150259656	2		protein_coding	XM_017601916.2	6057	0.00572108	0.011588	0.0122272	0.0115741	0.00286337	0.0115741	0.213495	0.355486	0.331597	0.35321	0.145958	0.331597	12	1.31184	2.13514	1.79462	2.32257	0.308032	1.57444	1101.52	1101.52	1101.52	1101.52	1101.52	204.81	150.41	176.993	131.811	229.775	178.76	0.185933	0.136547	0.16068	0.119663	0.208597	0.162284
29545	Morn4	1	-	240888325	240888351	26	240888342	2	mPAS	protein_coding		3119	0.00255271	0.0214448	0.00379513	0.00718825	0.00926132	0.00718825	0.129514	0.513158	0.161453	0.275697	0.304413	0.275697	12	5.89023	6.68667	5.91569	6.56185	6.6219	6.33527	589.502	589.502	589.502	589.502	589.502	86.3633	71.5039	86.1953	73.0407	71.1564	77.6519	0.146502	0.121295	0.146217	0.123902	0.120706	0.131725
335448	-	3	-	132225723	132225724	1	132225723				-	176	0.00523206	0.0182484	0.00531595	0.0062677	0.00927288	0.0062677	0.203621	0.468862	0.19906	0.256169	0.304413	0.256169	12	10.8603	11.3161	11.0198	10.8772	10.816	10.9779	32.1445	32.1445	32.1445	32.1445	32.1445	25.2508	23.8573	25.3755	24.771	26.2138	25.0937	0.785539	0.74219	0.789418	0.770615	0.8155	0.780652
232872	Garem1	18	-	12536736	12536737	1	12536737	2		protein_coding		199	0.0058988	0.0120025	0.0099193	0.00876151	0.00787114	0.00876151	0.217823	0.3632	0.292214	0.305765	0.277601	0.292214	12	11.9637	10.6631	9.83894	0.123899	9.12682	8.34331	36.6821	36.6821	36.6821	36.6821	36.6821	16.3662	31.6685	33.5923	13.9511	31.5172	25.419	0.446162	0.863322	0.915768	0.380325	0.859199	0.692955
99998	Hspa13	11	-	14375663	14375676	13	14375674	1	mPAS	protein_coding	NM_019271.2	3033	0.00399466	0.0211667	0.00337699	0.0130139	0.00302943	0.00399466	0.173221	0.509113	0.152986	0.37401	0.151984	0.173221	12	8.94003	10.4656	8.9013	8.42625	8.48716	9.04407	560.451	560.451	560.451	560.451	560.451	87.7641	61.4657	86.5008	80.9587	84.9788	80.3336	0.156596	0.109672	0.154342	0.144453	0.151626	0.143338
97307	LOC100912002	10	+	102278068	102278105	37	102278091	1	mPAS	lncRNA		904	0.00724142	0.0162081	0.00649696	0.00179421	0.0128607	0.00724142	0.244645	0.434731	0.227197	0.117482	0.363708	0.244645	12	2.95327	4.92271	3.31062	3.10001	4.10238	3.6778	179.792	179.792	179.792	179.792	179.792	48.6159	45.3353	51.5963	50.1362	53.2664	49.79	0.270402	0.252155	0.286978	0.278858	0.296267	0.276932
153157	Nudt9	14	-	5675363	5675384	21	5675378	1	mPAS	protein_coding		4508	0.00375757	0.00245884	0.0011054	0.0346071	0.00267295	0.00267295	0.166894	0.140948	0.0780105	0.645341	0.138616	0.140948	12	5.24448	6.5564	5.05287	6.53935	5.37109	5.75284	839.104	839.104	839.104	839.104	839.104	177.379	132.261	174.326	131.788	174.753	158.101	0.211391	0.157622	0.207753	0.157058	0.208261	0.188417
104069	Lsamp	11	-	58550983	58551004	21	58550989	24		protein_coding	XM_039088254.1	142	0.00868474	0.00571148	0.00328549	0.0168205	0.0104074	0.00868474	0.274156	0.230358	0.150776	0.432877	0.321281	0.274156	12	4.75783	4.90379	6.75444	6.41858	6.58855	5.88464	25.8008	25.8008	25.8008	25.8008	25.8008	19.1066	18.5193	15.5072	17.2209	16.4097	17.3527	0.740544	0.717779	0.601035	0.667455	0.636014	0.672565
24428	Ppp6r3	1	-	200693123	200693158	35	200693132	2	mPAS	protein_coding	XM_039079304.1	1456	0.00450938	0.0083664	0.00357035	0.0221674	0.0063361	0.0063361	0.186707	0.291648	0.156607	0.515591	0.241555	0.241555	12	0.0542222	0.454097	11.0964	0.190452	0.360606	2.43116	275.33	275.33	275.33	275.33	275.33	111.031	99.4448	118.638	108.437	102.529	108.016	0.403264	0.361184	0.430894	0.393843	0.372385	0.392314
170516	Mxd4	14	+	76574117	76574118	1	76574118	3		protein_coding		36	0.00869956	0.00562091	0.0160268	0.0115996	0.00331355	0.00869956	0.274352	0.228008	0.389356	0.35321	0.160715	0.274352	12	0.0802601	7.39076	7.86902	11.9267	10.5701	7.56736	6.61748	6.61748	6.61748	6.61748	6.61748	2.13224	4.31171	6.14916	2.84661	8.24565	4.73707	0.322213	0.651564	0.929229	0.430166	1.24604	0.715842
261632	-	19	+	50326232	50326232	0	50326232				-	126	0.00470458	0.0105065	0.01369	0.00607587	0.0104102	0.0104102	0.191697	0.33805	0.358307	0.252224	0.321281	0.321281	12	10.6148	11.414	11.9626	10.1184	9.96017	10.814	20.5215	20.5215	20.5215	20.5215	20.5215	16.6085	12.8809	8.63289	18.0242	18.9156	15.0124	0.80932	0.627676	0.420675	0.878306	0.921745	0.731544
370174	-	4	-	83920849	83920858	9	83920858				-	48	0.00846663	0.0124401	0.00957369	0.00832013	0.00670322	0.00846663	0.268338	0.372348	0.287997	0.297213	0.250522	0.287997	12	10.382	9.99585	8.99272	10.9116	9.55081	9.96659	7.92754	7.92754	7.92754	7.92754	7.92754	9.21673	9.46919	8.95241	8.13517	9.9358	9.14186	1.16262	1.19447	1.12928	1.02619	1.25333	1.15318
366093	Cttnbp2	4	-	46878486	46878495	9	46878491	6		protein_coding		379	0.0221823	0.000541535	0.00321241	0.00934287	0.0102793	0.00934287	0.465088	0.0597136	0.148712	0.315584	0.320039	0.315584	12	4.56166	6.47635	6.44131	6.45579	4.63973	5.71497	69.0842	69.0842	69.0842	69.0842	69.0842	35.3906	23.2486	23.3379	23.0944	34.7187	27.9581	0.512282	0.336526	0.337819	0.334294	0.502557	0.404695
469703	Diras1	7	-	8689085	8689088	3	8689088	3		protein_coding	NM_001108987.1	24	0.0115445	0.00481982	0.0124598	0.00799433	0.00920897	0.00920897	0.325594	0.209103	0.3364	0.292229	0.303686	0.303686	12	8.00798	7.10074	8.77288	3.92049	8.05336	7.17109	4.36514	4.36514	4.36514	4.36514	4.36514	4.42391	6.70832	1.49365	2.79906	4.03422	3.89183	1.01346	1.53679	0.342176	0.64123	0.92419	0.89157
470687	Angptl4	7	-	14550284	14550308	24	14550288	1	mPAS	protein_coding		1120	0.00715168	0.00882063	0.00370421	0.0151377	0.0112398	0.00882063	0.243089	0.299891	0.15989	0.407865	0.336737	0.299891	12	6.45428	5.9845	4.56536	6.01365	4.44555	5.49267	209.398	209.398	209.398	209.398	209.398	31.6062	39.7077	49.3801	39.2738	50.1205	42.0177	0.150938	0.189628	0.235819	0.187555	0.239355	0.200659
4764	Prkn	1	-	48714918	48714939	21	48714919	5		protein_coding		371	0.0118336	0.0100062	0.00351327	0.0156781	0.00526607	0.0100062	0.330573	0.327257	0.15511	0.415254	0.215787	0.327257	12	0.0758194	10.9415	11.5604	10.125	9.21979	8.3845	70.1037	70.1037	70.1037	70.1037	70.1037	32.0737	51.3422	42.5647	53.7192	48.8445	45.7089	0.457518	0.732374	0.607167	0.766282	0.696747	0.652018
392129	Krcc1	4	+	103274665	103274675	10	103274671	1	mPAS	protein_coding	NM_001009413.1	458	0.00387764	0.0081566	0.00287677	0.00659496	0.0248418	0.00659496	0.170247	0.288027	0.139276	0.262838	0.537921	0.262838	12	8.47916	8.09353	6.82616	6.51298	8.28844	7.64005	84.9689	84.9689	84.9689	84.9689	84.9689	27.0432	30.4743	35.1568	33.3616	26.9827	30.6037	0.318271	0.358652	0.41376	0.392633	0.31756	0.360175
469890	Dazap1	7	-	9424140	9424206	66	9424176	2		protein_coding		1590	0.00327081	0.0145675	0.0107815	0.00840908	0.00946442	0.00946442	0.153656	0.406519	0.306939	0.29802	0.306695	0.306695	12	1.88301	1.79739	1.82369	1.68329	1.91666	1.82081	290.46	290.46	290.46	290.46	290.46	84.022	86.3397	86.9464	86.1094	85.7129	85.8261	0.289272	0.297251	0.29934	0.296458	0.295093	0.295483
30145	Actr1a	1	-	245237809	245237847	38	245237823	4	mPAS	protein_coding		9232	0.00731632	0.00808995	0.00696475	0.0148116	0.00933092	0.00808995	0.246557	0.286733	0.236173	0.40237	0.304413	0.286733	12	5.75305	4.16872	4.24982	4.04856	6.16614	4.87726	1685.7	1685.7	1685.7	1685.7	1685.7	477.069	685.503	685.009	655.783	368.283	574.329	0.28301	0.406658	0.406365	0.389028	0.218475	0.340707
250940	Nkd1	19	-	18474726	18474743	17	18474740	4		protein_coding		119	0.0113678	0.0103517	0.00711747	0.0154005	0.0022918	0.0103517	0.323192	0.335389	0.239452	0.411612	0.127062	0.323192	12	6.22538	6.5696	4.96936	4.59461	4.56345	5.38448	22.1267	22.1267	22.1267	22.1267	22.1267	13.0589	11.5	15.6522	14.9505	14.8531	14.0029	0.590187	0.519735	0.707392	0.675676	0.671274	0.632853
264971	Ptcd2	2	-	30712271	30712299	28	30712278	1	mPAS	protein_coding		1262	0.00445986	0.0087287	0.00432306	0.0276103	0.00142855	0.00445986	0.185203	0.299135	0.173782	0.570193	0.0960546	0.185203	12	6.37155	4.4716	5.00773	6.44081	5.86582	5.6315	241.631	241.631	241.631	241.631	241.631	36.8822	52.976	52.2748	35.7623	45.2586	44.6308	0.152639	0.219244	0.216342	0.148004	0.187305	0.184707
31054	-	1	-	255477636	255477641	5	255477638				-	50	0.0102407	0.00984881	0.00574805	0.00876172	0.0120185	0.00984881	0.304768	0.324786	0.210543	0.305765	0.351161	0.305765	12	10.6306	11.0601	10.5784	11.0416	0.581969	8.77852	8.64239	8.64239	8.64239	8.64239	8.64239	9.38294	9.5464	9.41798	9.67756	6.94915	8.99481	1.08569	1.1046	1.08974	1.11978	0.804077	1.04078
349519	-	3	+	89135443	89135476	33	89135465				-	72282	0.013245	0.00295565	0.0061954	0.00378	0.0205057	0.0061954	0.349881	0.156699	0.221064	0.188448	0.478823	0.221064	12	5.48677	5.76981	5.39461	5.58191	5.16925	5.48047	13534	13534	13534	13534	13534	1784.91	1531.87	1866.92	1743.14	2073.84	1800.14	0.131883	0.113187	0.137943	0.128797	0.153232	0.133008
200517	-	16	-	61152619	61152622	3	61152621				-	4425	0.00747058	0.0219838	0.00588701	0.00486893	0.00647254	0.00647254	0.248422	0.519063	0.213661	0.220574	0.24446	0.24446	12	9.61027	10.0885	10.763	9.58965	10.182	10.0467	755.809	755.809	755.809	755.809	755.809	475.565	463.701	404.488	471.794	482.284	459.567	0.629214	0.613516	0.535173	0.624224	0.638104	0.608046
302561	Trim33	2	+	190892655	190892670	15	190892656	3	mPAS	protein_coding	XM_345266.9	107	0.00755086	0.024017	0.00221074	0.00707227	0.00608641	0.00707227	0.249489	0.545014	0.117599	0.273614	0.236314	0.249489	12	0.152747	0.307122	11.6628	0.151102	10.5464	4.56404	19.4591	19.4591	19.4591	19.4591	19.4591	9.12642	8.40576	11.089	9.13852	12.5325	10.0584	0.469007	0.431972	0.569862	0.469628	0.644047	0.516903
383529	Cyp51	4	+	30054494	30054636	142	30054593	4		protein_coding		1776	0.00524025	0.0104797	0.00950004	0.0184602	0.00339708	0.00950004	0.20369	0.337551	0.287277	0.456929	0.162472	0.287277	12	10.0774	10.77	10.9461	11.2195	11.045	10.8116	322.245	322.245	322.245	322.245	322.245	65.9514	68.5817	64.4773	61.1177	62.4275	64.5111	0.204663	0.212825	0.200088	0.189662	0.193727	0.200193
145136	Rab3gap1	13	+	39428799	39428808	9	39428800	3		misc_RNA	XR_005492428.1	604	0.00699408	0.0119897	0.00953161	0.00905442	0.00952671	0.00952671	0.24064	0.3632	0.287733	0.310435	0.307772	0.307772	12	1.98951	0.843353	1.87458	2.65079	1.92063	1.85577	109.579	109.579	109.579	109.579	109.579	31.6307	33.5463	31.7423	27.0906	32.4427	31.2905	0.288656	0.306138	0.289675	0.247224	0.296066	0.285552
258596	Ces4a	19	+	33022144	33022144	0	33022144	1		protein_coding		71	0.00934853	0.00548664	0.00880134	0.0146582	0.00883273	0.00883273	0.288795	0.225407	0.272687	0.400716	0.298028	0.288795	12	9.69603	9.00909	9.44993	10.4964	10.0677	9.74383	11.9897	11.9897	11.9897	11.9897	11.9897	12.1544	12.8673	12.5397	9.43124	11.0784	11.6142	1.01374	1.0732	1.04588	0.786612	0.923996	0.968684
89018	Ctdnep1	10	+	54713773	54713790	17	54713779	2	mPAS	protein_coding		2037	0.00528503	0.00513651	0.00680142	0.0216386	0.00831251	0.00680142	0.204181	0.216053	0.233254	0.508267	0.285717	0.233254	12	6.0065	5.16224	6.03379	6.66425	6.60202	6.09376	371.481	371.481	371.481	371.481	371.481	106.874	98.5646	106.839	100.22	100.342	102.568	0.287697	0.265329	0.287603	0.269786	0.270114	0.276106
507305	Dixdc1	8	-	51007828	51007842	14	51007837	2	mPAS	protein_coding	XM_039081728.1	156	0.00823145	0.0193457	0.00431229	0.00909714	0.00626824	0.00823145	0.263514	0.483749	0.173647	0.310435	0.240986	0.263514	12	0.27164	10.4113	11.6329	10.7755	0.243761	6.66701	27.2322	27.2322	27.2322	27.2322	27.2322	8.05354	15.7233	11.9767	14.5698	8.26638	11.718	0.295735	0.57738	0.439799	0.53502	0.303551	0.430297
514483	Gnai2	8	-	108288826	108288869	43	108288847	2		protein_coding		2146	0.0153721	0.0109371	0.00950745	0.00386107	0.00785338	0.00950745	0.379901	0.344914	0.287277	0.190398	0.277601	0.287277	12	5.57776	3.34104	4.25265	6.23151	5.78445	5.03748	398.808	398.808	398.808	398.808	398.808	75.2726	88.5256	101.823	48.6301	67.041	76.2585	0.188744	0.221975	0.255319	0.121939	0.168103	0.191216
287062	Wdr41	2	+	26272553	26272588	35	26272581	4		protein_coding		947	0.00835559	0.00784502	0.00412742	0.00237569	0.0248453	0.00784502	0.265921	0.279926	0.169529	0.140116	0.537921	0.265921	12	4.2186	4.26279	6.30848	6.09756	5.96764	5.37101	175.463	175.463	175.463	175.463	175.463	45.1073	44.0987	25.7327	29.995	32.2846	35.4436	0.257076	0.251328	0.146656	0.170948	0.183997	0.202001
524294	Spg21	8	+	66008530	66008543	13	66008533	1	mPAS	protein_coding	XM_006243251.4	2062	0.00752254	0.00287684	0.0101714	0.0133696	0.0138955	0.0101714	0.249107	0.153546	0.296005	0.380105	0.380142	0.296005	12	4.29336	4.26334	5.74439	4.00626	6.21196	4.90386	381.326	381.326	381.326	381.326	381.326	94.9322	91.6937	67.4034	95.547	48.7812	79.6715	0.248953	0.24046	0.17676	0.250565	0.127925	0.208933
228814	LOC307084	17	+	64095941	64095944	3	64095944	1		pseudogene		78	0.007586	0.00928862	0.00476861	0.0133582	0.012873	0.00928862	0.249646	0.311487	0.18604	0.380105	0.363708	0.311487	12	0.35784	10.2679	11.6656	0.36978	10.3235	6.59691	14.8061	14.8061	14.8061	14.8061	14.8061	7.46805	12.8272	10.7355	7.45462	13.203	10.3377	0.504389	0.866347	0.725071	0.503482	0.891723	0.698202
340169	Sapcd2	3	+	8192544	8192549	5	8192546	2		protein_coding		58	0.00715709	0.0115044	0.0135821	0.00805024	0.0075826	0.00805024	0.243089	0.354487	0.357152	0.293118	0.273209	0.293118	12	8.03912	5.13123	5.10719	7.13741	8.04331	6.69165	10.0333	10.0333	10.0333	10.0333	10.0333	5.00787	7.63689	7.60203	8.29142	5.05717	6.71908	0.499125	0.761156	0.757681	0.826391	0.504039	0.669679
111236	Olig2	11	+	30478786	30478813	27	30478788	2		protein_coding		286	0.00814048	0.00441544	0.00384438	0.0264863	0.00503127	0.00503127	0.261657	0.199178	0.162563	0.559591	0.208044	0.208044	12	5.975	4.84157	6.45887	5.69957	5.39608	5.67422	54.0487	54.0487	54.0487	54.0487	54.0487	48.6843	44.6256	44.7532	49.6283	49.629	47.4641	0.90075	0.825657	0.828017	0.918215	0.918228	0.878173
37463	-	1	+	57720113	57720113	0	57720113				-	511	0.00232531	0.0137367	0.00692422	0.0116205	0.013561	0.0116205	0.122666	0.391542	0.236173	0.353386	0.375582	0.353386	12	8.26799	10.0127	9.76199	8.89146	9.02065	9.19096	92.5722	92.5722	92.5722	92.5722	92.5722	31.0457	22.2716	26.1657	30.4674	31.8763	28.3653	0.335367	0.240587	0.282652	0.329121	0.34434	0.306413
9350	Med29	1	-	83677093	83677106	13	83677105	3		protein_coding		584	0.00207918	0.0126141	0.0154122	0.00284103	0.015392	0.0126141	0.115032	0.375001	0.381187	0.158285	0.406248	0.375001	12	2.88296	2.64496	4.26706	2.83948	2.76165	3.07922	103.5	103.5	103.5	103.5	103.5	37.8535	37.0905	30.8137	38.6647	38.0072	36.4859	0.365734	0.358363	0.297717	0.373572	0.367219	0.352521
406827	Erp44	5	-	62517338	62517354	16	62517342	4		protein_coding		67	0.0124699	0.00604354	0.0101785	0.00929427	0.0110021	0.0101785	0.339336	0.236652	0.296005	0.314667	0.332756	0.314667	12	10.733	10.2897	9.68605	9.83356	10.5485	10.2182	11.7361	11.7361	11.7361	11.7361	11.7361	11.1519	11.8534	11.769	12.0633	11.2887	11.6252	0.950223	1.01	1.00281	1.02788	0.961878	0.990557
567782	-	X	+	7320726	7320732	6	7320727				-	956	0.0119982	0.0103605	0.0145375	0.00644051	0.00592279	0.0103605	0.333064	0.335389	0.369333	0.259979	0.233073	0.333064	12	9.92134	10.882	10.0052	10.8545	10.2527	10.3831	167.64	167.64	167.64	167.64	167.64	77.1971	64.3852	76.2002	65.1011	75.1071	71.5981	0.460492	0.384067	0.454546	0.388338	0.448025	0.427094
299933	Hdgf	2	+	173379741	173379759	18	173379756	3	mPAS	protein_coding		3507	0.00941613	0.019152	0.00725769	0.00998224	0.0034535	0.00941613	0.290037	0.481178	0.242358	0.32799	0.164191	0.290037	12	5.02195	4.57123	4.44314	5.2651	5.0645	4.87318	656.556	656.556	656.556	656.556	656.556	165.576	169.768	167.607	160.535	163.853	165.468	0.252189	0.258574	0.255282	0.24451	0.249564	0.252024
396393	-	4	+	142203704	142203715	11	142203711				-	3031	0.0163757	0.0140459	0.0107864	0.00448047	0.00383154	0.0107864	0.391328	0.397555	0.306939	0.209207	0.174401	0.306939	12	10.7357	10.6294	10.0367	10.333	9.15501	10.178	580.528	580.528	580.528	580.528	580.528	243.223	251.861	269.468	270.014	264.518	259.817	0.418969	0.433848	0.464179	0.465119	0.455651	0.447553
255978	-	19	+	6728938	6728942	4	6728942				-	45	0.0115692	0.0112574	0.00723356	0.00918996	0.0103814	0.0103814	0.326001	0.350835	0.242061	0.312469	0.321141	0.321141	12	5.98654	4.74424	6.41681	6.77604	6.18927	6.02258	10.2762	10.2762	10.2762	10.2762	10.2762	9.54418	9.1897	8.77347	7.87368	9.193	8.91481	0.928761	0.894266	0.853762	0.766202	0.894587	0.867516
465003	Nrxn3	6	+	109273254	109273259	5	109273256	12		protein_coding		1399	0.0121745	0.00413395	0.00987777	0.0130274	0.0106289	0.0106289	0.335904	0.190522	0.291803	0.374062	0.325185	0.325185	12	5.95966	5.10264	7.85508	5.11606	6.49258	6.1052	263.984	263.984	263.984	263.984	263.984	107.834	91.2362	69.3434	90.9587	106.302	93.1348	0.408487	0.345613	0.262681	0.344562	0.402683	0.352805
486348	Nfic	7	+	8309894	8309935	41	8309931	2	mPAS	protein_coding		194	0.00372044	0.0240475	0.00809251	0.00217391	0.0118431	0.00809251	0.166272	0.545014	0.257091	0.133533	0.348242	0.257091	12	10.4071	9.49503	9.69593	9.55898	10.0318	9.83776	36.2752	36.2752	36.2752	36.2752	36.2752	9.55152	11.741	11.9141	12.8875	10.702	11.3592	0.263307	0.323665	0.328437	0.355269	0.295023	0.31314
191189	-	15	+	72559631	72559672	41	72559670				-	5090	0.0133399	0.012335	0.0104693	0.00493834	0.00889963	0.0104693	0.350849	0.370247	0.301155	0.222547	0.29967	0.301155	12	10.1584	9.95969	10.3759	10.534	9.95044	10.1957	862.487	862.487	862.487	862.487	862.487	561.712	547.851	547.874	521.296	570.231	549.793	0.651271	0.635199	0.635226	0.60441	0.661147	0.637451
242759	-	18	+	26534206	26534209	3	26534206				-	49	0.0110124	0.00832329	0.0117905	0.00784865	0.0111888	0.0110124	0.316775	0.290464	0.324537	0.289767	0.336648	0.316775	12	7.37693	8.16888	7.79946	5.94963	7.41083	7.34115	8.10351	8.10351	8.10351	8.10351	8.10351	7.7233	4.61468	6.36966	9.34667	7.52866	7.1166	0.953081	0.569467	0.786038	1.15341	0.929062	0.878211
423368	-	5	+	42127473	42127474	1	42127473				-	864	0.00488209	0.0181279	0.00304593	0.00717562	0.0169636	0.00717562	0.196256	0.467659	0.143516	0.275545	0.429714	0.275545	12	10.9024	0.225744	11.1406	0.368168	11.4124	6.80986	162.794	162.794	162.794	162.794	162.794	107.294	75.633	106.923	70.5889	103.711	92.8301	0.659079	0.464592	0.656797	0.433608	0.637069	0.570229
57786	-	1	+	215521282	215521284	2	215521283				-	1172	0.00205891	0.0191678	0.0051295	0.012264	0.0116079	0.0116079	0.114778	0.481196	0.194854	0.363988	0.343552	0.343552	12	10.7281	0.123881	10.7162	10.4341	11.3685	8.67417	210.915	210.915	210.915	210.915	210.915	146.065	83.3028	149.008	150.85	129.902	131.826	0.69253	0.39496	0.706483	0.71522	0.6159	0.625019
267417	Zfp131	2	-	51725272	51725279	7	51725273	2		protein_coding		182	0.013564	0.00476757	0.0152366	0.00874338	0.00804582	0.00874338	0.35482	0.208545	0.379527	0.305765	0.280166	0.305765	12	4.30543	5.52347	5.75837	3.39115	3.03529	4.40274	35.7084	35.7084	35.7084	35.7084	35.7084	19.07	13.1184	11.3863	18.6987	18.0499	16.0647	0.53405	0.367375	0.31887	0.523652	0.505482	0.449886
470862	Bpifc	7	-	17854732	17854736	4	17854734	1		protein_coding	XM_008765224.3	294	0.00421921	0.0267025	0.00668317	0.00864608	0.00411966	0.00668317	0.17961	0.577412	0.230693	0.303396	0.183258	0.230693	12	10.1109	9.87571	8.64801	10.0874	8.62997	9.4704	51.9906	51.9906	51.9906	51.9906	51.9906	25.3177	26.7374	34.6214	25.2892	34.3618	29.2655	0.486968	0.514275	0.665916	0.486419	0.660923	0.5629
445251	Mdga2	6	-	84756809	84756819	10	84756811	7		protein_coding	XR_001838167.2	124	0.0091362	0.0103142	0.0115272	0.00335245	0.0160651	0.0103142	0.284259	0.335258	0.320831	0.174817	0.415914	0.320831	12	9.73575	7.84055	9.83336	9.83326	9.74836	9.39826	20.1977	20.1977	20.1977	20.1977	20.1977	11.4958	12.0775	10.6939	10.4089	11.1768	11.1706	0.569166	0.597967	0.529463	0.51535	0.553368	0.553063
481936	Pdgfb	7	-	111539496	111539540	44	111539525	1		protein_coding		289	0.00537475	0.0127906	0.0115726	0.0100924	0.0105969	0.0105969	0.205398	0.378204	0.32123	0.32918	0.32452	0.32452	12	10.1801	8.9156	8.97391	7.86543	10.0877	9.20455	53.3388	53.3388	53.3388	53.3388	53.3388	12.0217	21.3229	21.136	23.2709	12.5975	18.0698	0.225383	0.399763	0.39626	0.436285	0.236179	0.338774
106460	Kalrn	11	-	66619113	66619113	0	66619113	13		protein_coding	XM_039088658.1	57	0.0155034	0.00479523	0.0065566	0.0103097	0.0133038	0.0103097	0.38166	0.208606	0.228222	0.332728	0.371581	0.332728	12	9.35762	10.5614	10.9356	8.98186	10.7749	10.1223	11.4566	11.4566	11.4566	11.4566	11.4566	12.8299	12.7199	11.4529	12.5129	11.858	12.2747	1.11987	1.11027	0.999679	1.0922	1.03503	1.07141
289177	LOC102547360	2	+	51634361	51634364	3	51634363	1		lncRNA	XR_001836592.2	40	0.0062122	0.0151184	0.0166672	0.00510816	0.00761216	0.00761216	0.224183	0.416044	0.398569	0.225305	0.273591	0.273591	12	5.76959	4.98578	7.67409	3.81743	6.00389	5.65015	7.17501	7.17501	7.17501	7.17501	7.17501	10.3935	10.0678	4.44301	6.06248	10.1735	8.22806	1.44857	1.40318	0.619233	0.844944	1.41791	1.14677
4111	Rgs17	1	-	42222752	42222764	12	42222757	8		protein_coding		176	0.00974476	0.0175878	0.00679645	0.00914932	0.00749886	0.00914932	0.294083	0.460337	0.233254	0.31142	0.270992	0.294083	12	0.434894	10.3669	0.246351	11.1733	0.457176	4.53572	32.7066	32.7066	32.7066	32.7066	32.7066	12.0745	17.4194	13.2699	17.3976	11.8909	14.4105	0.369176	0.532597	0.405725	0.531929	0.363563	0.440598
281062	LOC499706	2	-	214413129	214413138	9	214413138	1		pseudogene		54	0.012987	0.00902725	0.00948195	0.00696907	0.0124556	0.00948195	0.346871	0.305302	0.287277	0.271221	0.359049	0.305302	12	6.53952	6.60818	4.55038	6.56773	6.51228	6.15562	9.45458	9.45458	9.45458	9.45458	9.45458	7.44857	7.34384	9.87383	7.58113	7.61712	7.9729	0.787827	0.776749	1.04434	0.801847	0.805654	0.843284
178457	-	15	-	42300525	42300561	36	42300527				-	520	0.014891	0.00137861	0.00973295	0.0117685	0.0131555	0.0117685	0.375352	0.101344	0.290225	0.355259	0.369062	0.355259	12	10.6209	10.0161	10.215	10.3732	9.66224	10.1775	94.2349	94.2349	94.2349	94.2349	94.2349	24.9731	34.3354	29.9007	29.1059	34.535	30.57	0.265009	0.36436	0.3173	0.308866	0.366478	0.324403
571388	Il1rapl1	X	+	51563584	51563646	62	51563636	14		protein_coding	XM_017602087.2	4304	0.00594742	0.012712	0.00349632	0.0064771	0.0223487	0.0064771	0.218856	0.377193	0.154946	0.260371	0.501929	0.260371	12	5.13093	6.35994	4.55404	5.22706	6.34207	5.52281	827.302	827.302	827.302	827.302	827.302	250.008	169.531	260.599	242.351	169.017	218.301	0.302197	0.20492	0.314998	0.292941	0.204299	0.263871
7597	Mzf1	1	-	73671341	73671350	9	73671347	3		protein_coding		354	0.00555139	0.0037194	0.0121914	0.0266226	0.00294669	0.00555139	0.209377	0.178155	0.33119	0.559591	0.148537	0.209377	12	6.51653	6.58369	6.49878	6.6208	4.59325	6.16261	66.4004	66.4004	66.4004	66.4004	66.4004	29.3833	28.199	29.735	28.3464	35.6966	30.2721	0.442517	0.424681	0.447814	0.426901	0.537596	0.455902
33245	Hbs1l	1	+	16170064	16170082	18	16170079	3	mPAS	protein_coding		1964	0.0102561	0.00378284	0.00781835	0.0261369	0.00350702	0.00781835	0.304768	0.180649	0.253354	0.556232	0.165733	0.253354	12	0.289792	10.3974	0.460932	0.113718	11.2073	4.49383	363.012	363.012	363.012	363.012	363.012	38.8174	53.6905	35.3777	42.0896	53.1476	44.6246	0.106931	0.147903	0.0974558	0.115945	0.146407	0.122929
139704	Pea15	13	-	84658541	84658565	24	84658549	2		protein_coding		8055	0.00245464	0.0107742	0.00539303	0.0190067	0.0138816	0.0107742	0.125729	0.341475	0.201017	0.467379	0.380142	0.341475	12	6.486	6.09687	5.67103	4.71988	4.57683	5.51012	1512.27	1512.27	1512.27	1512.27	1512.27	229.109	259.371	281.957	274.589	277.624	264.53	0.1515	0.171511	0.186446	0.181574	0.183581	0.174923
37282	LOC100125364	1	+	55952231	55952240	9	55952231	3		protein_coding		239	0.0119492	0.0186763	0.00408864	0.00806704	0.0091777	0.0091777	0.332474	0.473347	0.168594	0.293118	0.303582	0.303582	12	10.1693	9.02184	8.99019	10.9706	10.2394	9.87826	41.6554	41.6554	41.6554	41.6554	41.6554	21.5723	18.8823	19.6628	18.6421	21.8373	20.1194	0.517877	0.453297	0.472036	0.447533	0.524238	0.482996
567356	Zfp182	X	+	1001449	1001480	31	1001460	1	mPAS	protein_coding		1702	0.0108515	0.0173395	0.00584916	0.0131986	0.0047944	0.0108515	0.313636	0.455838	0.213018	0.376932	0.201931	0.313636	12	11.3428	11.227	0.0206819	0.19177	0.634223	4.68328	324.235	324.235	324.235	324.235	324.235	99.4587	99.3402	90.4988	86.942	73.3775	89.9234	0.306749	0.306383	0.279115	0.268145	0.22631	0.27734
526165	Leo1	8	+	76208330	76208339	9	76208337	2		protein_coding		1248	0.0156508	0.00754954	0.019254	0.00232814	0.00770474	0.00770474	0.383506	0.273688	0.433465	0.138975	0.27523	0.27523	12	8.94179	11.7494	10.3439	10.7335	9.88432	10.3306	240.382	240.382	240.382	240.382	240.382	103.704	53.4838	103.959	98.2791	110.104	93.906	0.431411	0.222495	0.432475	0.408845	0.458038	0.390653
247440	Tcf4	18	+	63287310	63287337	27	63287310	13		protein_coding		116	0.012356	0.00976891	0.00959477	0.0115403	0.00935563	0.00976891	0.338266	0.323157	0.287997	0.353181	0.304413	0.323157	12	5.06887	6.41371	6.54145	6.01206	5.13101	5.83342	21.5333	21.5333	21.5333	21.5333	21.5333	20.3446	21.5305	21.2169	22.2908	20.4619	21.169	0.944797	0.999868	0.985307	1.03518	0.950244	0.983079
483118	Selenoo	7	-	120177532	120177538	6	120177536	4		protein_coding	NM_001085485.1	303	0.011885	0.00827148	0.00883792	0.00568016	0.0179836	0.00883792	0.331079	0.289292	0.273287	0.241664	0.443404	0.289292	12	4.03102	5.02858	3.29016	3.46473	6.19877	4.40265	54.8561	54.8561	54.8561	54.8561	54.8561	32.4539	29.8705	30.0695	29.4246	16.5424	27.6722	0.591618	0.544524	0.548151	0.536395	0.30156	0.50445
221935	RGD1566369	17	-	83759337	83759368	31	83759340	1	mPAS	protein_coding	XM_039096347.1	869	0.00336231	0.0176158	0.0059061	0.0126894	0.0131199	0.0126894	0.155879	0.460337	0.213866	0.371407	0.369043	0.369043	12	5.74642	5.88076	5.8003	6.17643	5.05529	5.73184	167.785	167.785	167.785	167.785	167.785	66.9108	60.2891	64.7449	45.9924	96.4206	66.8716	0.39879	0.359324	0.385881	0.274116	0.574669	0.398556
30514	-	1	-	247841801	247841806	5	247841801				-	92	0.00530157	0.0130337	0.0100979	0.0114321	0.0128371	0.0114321	0.204323	0.379564	0.29512	0.352475	0.363708	0.352475	12	10.181	11.4124	9.96978	10.0334	10.2252	10.3643	15.2982	15.2982	15.2982	15.2982	15.2982	17.2096	12.0523	17.2406	16.8468	17.011	16.0721	1.12494	0.787824	1.12697	1.10123	1.11196	1.05058
64886	Ubn1	10	-	10496571	10496582	11	10496579	1	mPAS	protein_coding	NM_001106977.2	856	0.0051025	0.0186305	0.0101016	0.0112937	0.00769321	0.0101016	0.200793	0.472941	0.29512	0.349564	0.275127	0.29512	12	0.378003	10.8575	10.974	10.8956	11.967	9.01442	154.798	154.798	154.798	154.798	154.798	39.616	65.1671	65.0559	62.4607	49.6957	56.3991	0.255921	0.420982	0.420263	0.403498	0.321036	0.36434
577794	Aff2	X	+	148430993	148431014	21	148431014	2		protein_coding		59	0.00535489	0.011375	0.0185388	0.00286816	0.0147943	0.011375	0.205133	0.352244	0.421731	0.159132	0.396697	0.352244	12	9.90472	0.0185002	10.0424	10.8066	9.25973	8.0064	10.5595	10.5595	10.5595	10.5595	10.5595	10.3153	5.68324	10.4176	9.86356	9.54403	9.16475	0.976875	0.538213	0.986569	0.934096	0.903836	0.867918
210811	LOC120097398	16	+	66306137	66306140	3	66306140	4		protein_coding	XM_039094940.1	78	0.0177229	0.0170583	0.00398086	0.00742386	0.00700104	0.00742386	0.411123	0.450307	0.166105	0.282009	0.257031	0.282009	12	4.75545	5.18529	4.7538	4.15355	4.31385	4.63239	14.4187	14.4187	14.4187	14.4187	14.4187	13.3629	12.7034	13.3261	13.4047	13.2893	13.2173	0.926778	0.881039	0.924225	0.92968	0.921671	0.916679
256611	LOC103694288	19	+	13447060	13447092	32	13447091	1		lncRNA		181	0.00908577	0.0106255	0.0233741	0.00340562	0.00671305	0.00908577	0.283188	0.339666	0.484841	0.176431	0.250522	0.283188	12	10.3049	10.034	9.28654	10.7731	10.8237	10.2445	32.2642	32.2642	32.2642	32.2642	32.2642	29.7778	30.6808	29.1329	27.6269	27.0363	28.8509	0.922935	0.950923	0.902949	0.856271	0.837966	0.894209
37543	Spaca6	1	+	58675905	58675929	24	58675929	2		protein_coding	XM_039091111.1	133	0.00960966	0.00230123	0.0203566	0.00748171	0.0135772	0.00960966	0.292933	0.134834	0.449558	0.282517	0.375585	0.292933	12	7.07891	8.16595	7.40073	8.15541	6.27237	7.41467	24.1555	24.1555	24.1555	24.1555	24.1555	16.2339	8.57989	14.6947	9.09541	18.273	13.3754	0.67206	0.355194	0.608339	0.376536	0.756474	0.553721
312801	-	20	-	30227310	30227315	5	30227311				-	73	0.0045551	0.00701768	0.00596988	0.0235846	0.0124023	0.00701768	0.187443	0.260656	0.215652	0.530632	0.359049	0.260656	12	0.579614	0.805771	1.72748	2.5102	0.87939	1.30049	12.521	12.521	12.521	12.521	12.521	13.4509	14.0144	13.6041	11.5218	13.9697	13.3122	1.07426	1.11927	1.0865	0.920199	1.1157	1.06319
45721	Mrps11	1	+	132717250	132717257	7	132717251	1	mPAS	protein_coding	XM_006229400.3	1773	0.00601986	0.0107519	0.00888418	0.00527868	0.0226215	0.00888418	0.220754	0.341448	0.274091	0.230814	0.505552	0.274091	12	0.839745	1.93638	2.69182	1.67858	1.16644	1.66259	320.623	320.623	320.623	320.623	320.623	60.9993	66.6283	60.7541	68.657	64.141	64.2359	0.190253	0.207809	0.189488	0.214136	0.200051	0.200347
178330	Ppp2r2a	15	-	41204656	41204714	58	41204704	2	mPAS	protein_coding		48318	0.00522675	0.0253478	0.003433	0.0170789	0.00258389	0.00522675	0.203621	0.55862	0.154102	0.436695	0.136426	0.203621	12	8.1656	6.46792	8.02545	8.21424	7.30938	7.63652	8759.63	8759.63	8759.63	8759.63	8759.63	2645.31	3871.61	2752.23	2577.65	3598.94	3089.15	0.301989	0.441983	0.314195	0.294264	0.410855	0.352657
76584	Srcin1	10	-	82513013	82513032	19	82513026	3		protein_coding		1261	0.00763925	0.010354	0.0160563	0.0136461	0.00628825	0.010354	0.250879	0.335389	0.389356	0.385552	0.240986	0.335389	12	7.92999	8.31171	6.55021	8.33817	6.55308	7.53663	231.911	231.911	231.911	231.911	231.911	60.4037	46.6105	83.8078	48.3414	83.8458	64.6018	0.260461	0.200985	0.36138	0.208448	0.361544	0.278564
357911	-	3	+	147040748	147040779	31	147040771				-	3703	0.0124546	0.0137771	0.0117932	0.00671577	0.00958045	0.0117932	0.339336	0.391692	0.324537	0.265265	0.309023	0.324537	12	4.65084	6.4175	4.35295	4.93459	5.75021	5.22122	672.464	672.464	672.464	672.464	672.464	385.156	264.271	393.942	395.047	347.681	357.219	0.572753	0.392989	0.585819	0.587462	0.517025	0.53121
417613	Kazn	5	-	154392783	154392825	42	154392795	5	mPAS	protein_coding	XM_017593423.2	483	0.00185872	0.0326639	0.00977883	0.00251945	0.00767121	0.00767121	0.107323	0.65404	0.290653	0.145896	0.27465	0.27465	12	2.50425	3.82591	3.10145	3.03823	3.91197	3.27636	91.8356	91.8356	91.8356	91.8356	91.8356	30.5153	28.9511	31.9042	32.7423	28.0474	30.4321	0.332282	0.315249	0.347406	0.356532	0.305408	0.331375
318594	Micu1	20	+	27816305	27816327	22	27816322	2	mPAS	protein_coding	XM_006256420.4	788	0.0106996	0.0197131	0.0132006	0.00923872	0.00167593	0.0106996	0.311733	0.491387	0.350511	0.313391	0.10395	0.313391	12	0.293561	10.1267	10.3836	0.0224848	9.26803	6.01888	147.4	147.4	147.4	147.4	147.4	22.8423	42.2525	42.9177	27.6771	36.6282	34.4635	0.154968	0.286652	0.291165	0.187768	0.248495	0.233809
329041	Ptprj	3	-	76405913	76405932	19	76405919	1	mPAS	protein_coding		5289	0.00678969	0.0114255	0.0157668	0.00533161	0.0153349	0.0114255	0.236945	0.352956	0.385454	0.231306	0.406163	0.352956	12	5.2332	4.73917	5.62209	5.19127	5.84598	5.32634	977.971	977.971	977.971	977.971	977.971	185.871	172.388	184.628	182.052	181.349	181.258	0.190058	0.176271	0.188787	0.186152	0.185434	0.18534
357799	Ctnnbl1	3	+	146548967	146549001	34	146548987	1	mPAS	protein_coding		3523	0.00265703	0.0197631	0.0121216	0.00425791	0.0159696	0.0121216	0.132672	0.491862	0.330143	0.203031	0.414335	0.330143	12	1.41	0.393342	1.57788	0.368261	0.60198	0.870292	666.204	666.204	666.204	666.204	666.204	86.6015	94.1233	87.6675	92.5781	94.5133	91.0967	0.129992	0.141283	0.131593	0.138964	0.141868	0.13674
317411	Cisd1	20	+	17268302	17268378	76	17268353	3		protein_coding		414	0.0176594	0.00271257	0.00500578	0.0128584	0.0167767	0.0128584	0.409948	0.149037	0.192223	0.373599	0.426565	0.373599	12	4.29922	5.87145	6.3061	4.51099	4.81003	5.15956	77.6184	77.6184	77.6184	77.6184	77.6184	31.0784	22.1482	16.8554	30.7461	30.1587	26.1974	0.400401	0.285348	0.217158	0.396119	0.388551	0.337515
38945	LOC100364427	1	+	76617043	76617062	19	76617054	1	mPAS	protein_coding	XM_039100817.1	2843	0.00373364	0.0272683	0.00368441	0.00901317	0.0113358	0.00901317	0.16653	0.585899	0.159844	0.310435	0.338119	0.310435	12	6.53286	6.71729	6.26105	6.5789	6.24607	6.46724	543.086	543.086	543.086	543.086	543.086	195.833	184.821	208.728	195.66	209.287	198.866	0.360593	0.340316	0.384337	0.360275	0.385366	0.366177
67760	Gabra1	10	-	26595689	26595723	34	26595700	4		protein_coding		6939	0.00333562	0.0218838	0.00651162	0.00999463	0.0133573	0.00999463	0.155322	0.518359	0.227241	0.32799	0.372095	0.32799	12	8.3967	7.76374	8.34496	8.39737	6.49639	7.87983	1301.59	1301.59	1301.59	1301.59	1301.59	86.0698	116.439	84.7313	88.2197	131.304	101.353	0.0661264	0.0894588	0.065098	0.0677781	0.10088	0.0778682
118381	Polr1d	12	-	7970589	7970618	29	7970599	2	mPAS	protein_coding		3367	0.00889195	0.0138084	0.0102957	0.0180389	0.00415585	0.0102957	0.278758	0.39188	0.297864	0.451427	0.184069	0.297864	12	11.192	10.6933	10.722	0.000984068	11.187	8.75905	621.753	621.753	621.753	621.753	621.753	140.613	152.592	153.594	103.594	138.746	137.828	0.226157	0.245423	0.247034	0.166616	0.223153	0.221676
185367	LOC498453	15	+	10401400	10401419	19	10401403	1		protein_coding		108	0.00540746	0.00861019	0.00641506	0.0165831	0.018253	0.00861019	0.205905	0.296888	0.225841	0.429902	0.447959	0.296888	12	5.95241	6.94269	5.22911	8.14049	7.71378	6.7957	18.7983	18.7983	18.7983	18.7983	18.7983	16.8867	16.0596	14.8046	9.28805	11.5242	13.7126	0.898307	0.854307	0.787548	0.494089	0.613046	0.72946
142628	Cr1l	13	-	106613270	106613282	12	106613274	2		protein_coding		302	0.00966414	0.0152835	0.00831737	0.01406	0.0082189	0.00966414	0.293105	0.419134	0.261261	0.392704	0.284013	0.293105	12	11.8586	11.2328	10.4419	11.8712	0.306424	9.14219	51.699	51.699	51.699	51.699	51.699	23.9526	27.4575	28.3601	23.7291	19.7048	24.6408	0.463308	0.531103	0.548562	0.458985	0.381144	0.476621
443263	-	6	-	54329751	54329751	0	54329751				-	32	0.0100804	0.0112236	0.0117619	0.0117426	0.0108212	0.0112236	0.30115	0.35047	0.324239	0.354815	0.329797	0.329797	12	9.82365	9.45979	10.2952	10.0743	9.96842	9.92427	6.23487	6.23487	6.23487	6.23487	6.23487	11.0635	10.4182	11.0864	11.2387	10.8714	10.9356	1.77446	1.67095	1.77813	1.80255	1.74364	1.75395
375405	-	4	-	141719373	141719376	3	141719373				-	282	0.00486038	0.0142748	0.00212559	0.0260798	0.00832914	0.00832914	0.195877	0.401884	0.115784	0.556232	0.285806	0.285806	12	1.69194	0.538851	0.55149	1.51524	1.39726	1.13896	56.2037	56.2037	56.2037	56.2037	56.2037	29.0898	29.7789	29.5968	30.4542	30.6487	29.9137	0.517578	0.529838	0.526598	0.541853	0.545314	0.532236
573189	LOC100363993	X	+	76981841	76981844	3	76981841	1		protein_coding		547	0.00490772	0.0151871	0.00764072	0.00746534	0.020632	0.00764072	0.196786	0.417572	0.250496	0.282501	0.480359	0.282501	12	0.00157784	0.128473	9.91462	0.0274427	9.4195	3.89832	97.2915	97.2915	97.2915	97.2915	97.2915	29.9391	26.3422	62.1331	29.234	62.7964	42.089	0.307726	0.270755	0.638629	0.300479	0.645446	0.432607
319892	Fyn	20	+	42960672	42960675	3	42960672	4		protein_coding	XM_006256522.2	758	0.00973282	0.00764332	0.0101538	0.0119179	0.0164883	0.0101538	0.294083	0.275515	0.295829	0.358406	0.421607	0.295829	12	5.24288	4.76294	5.98717	6.33353	5.53108	5.57152	142.202	142.202	142.202	142.202	142.202	64.814	59.0476	62.0688	57.7811	64.9233	61.727	0.455787	0.415236	0.436482	0.40633	0.456555	0.434078
573919	-	X	+	95939919	95939971	52	95939954				-	175	0.0108786	0.00575842	0.00984731	0.0171984	0.0124919	0.0108786	0.314065	0.231481	0.291324	0.438379	0.359659	0.314065	12	0.358222	10.6733	0.433104	10.9376	11.4071	6.76186	31.2157	31.2157	31.2157	31.2157	31.2157	15.5459	17.9579	15.2685	18.4696	18.8887	17.2261	0.498016	0.575286	0.489131	0.591677	0.605102	0.551842
357857	Rprd1b	3	+	146729244	146729254	10	146729248	1	mPAS	protein_coding	NM_001098727.1	521	0.00347967	0.0402319	0.00389577	0.00771984	0.00112298	0.00389577	0.15877	0.725469	0.164082	0.286929	0.0816072	0.164082	12	9.67144	9.76357	9.16821	10.2298	9.7985	9.7263	97.142	97.142	97.142	97.142	97.142	32.3852	31.2843	33.0167	28.9168	31.6338	31.4473	0.33338	0.322047	0.339881	0.297676	0.325645	0.323726
238839	Epg5	18	-	71453824	71453834	10	71453825	3		protein_coding	XR_597059.3	6589	0.0111165	0.00908469	0.0133521	0.0111472	0.0118215	0.0111472	0.318617	0.306018	0.352472	0.346719	0.347929	0.346719	12	10.5733	0.110274	0.00044554	9.7531	10.1092	6.10928	1062.03	1062.03	1062.03	1062.03	1062.03	791.68	328.973	372.569	829.838	874.155	639.443	0.74544	0.309759	0.350808	0.781369	0.823098	0.602095
325368	Cacnb4	3	-	36909577	36909586	9	36909577	5		protein_coding		44	0.00478728	0.0147923	0.0101528	0.0228237	0.00400071	0.0101528	0.193948	0.40999	0.295829	0.521824	0.17945	0.295829	12	8.01693	5.18439	6.55076	7.07361	7.88815	6.94277	7.34047	7.34047	7.34047	7.34047	7.34047	4.37262	7.33143	8.17913	7.4853	4.93403	6.4605	0.595687	0.998768	1.11425	1.01973	0.672168	0.880121
285821	-	2	+	13163688	13163690	2	13163689				-	988	0.00596654	0.0166139	0.00897521	0.00937102	0.0157756	0.00937102	0.219305	0.442254	0.275387	0.315584	0.41098	0.315584	12	10.7339	0.177219	9.90158	10.1226	10.6655	8.32018	172.488	172.488	172.488	172.488	172.488	110.208	52.5936	119.945	116.219	118.613	103.516	0.63893	0.304912	0.695381	0.673783	0.687658	0.600133
536628	Txndc9	9	-	40212091	40212123	32	40212094	4		protein_coding		226	0.0149044	0.00278564	0.0102778	0.00759702	0.0211606	0.0102778	0.375352	0.151027	0.297802	0.284839	0.486954	0.297802	12	4.89538	4.41783	5.96849	6.44112	6.1809	5.58074	38.2334	38.2334	38.2334	38.2334	38.2334	30.1142	28.3073	24.9983	20.1444	22.9167	25.2962	0.787641	0.740382	0.653834	0.52688	0.59939	0.661625
52218	Uqcrc2	1	+	175198274	175198287	13	175198275	4		protein_coding		106	0.0116196	0.00759327	0.00729659	0.0100376	0.0201907	0.0100376	0.327131	0.274334	0.242891	0.328285	0.474257	0.327131	12	5.67831	4.8556	6.79838	5.88457	6.25566	5.8945	18.7244	18.7244	18.7244	18.7244	18.7244	13.8004	12.4581	11.505	13.7831	13.1687	12.943	0.737027	0.665342	0.614438	0.736105	0.703293	0.691241
304920	Ank2	2	+	215637478	215637489	11	215637487	8		protein_coding	XM_039104005.1	246	0.0158782	0.00782498	0.00711787	0.0145651	0.0113604	0.0113604	0.386394	0.279582	0.239452	0.399923	0.338119	0.338119	12	11.7582	10.7565	10.6077	11.1516	0.424986	8.9398	49.4941	49.4941	49.4941	49.4941	49.4941	25.7076	26.1291	25.1617	26.8028	21.5431	25.0688	0.519407	0.527923	0.508377	0.541534	0.435265	0.506501
55747	Doc2g	1	+	201299844	201299872	28	201299866	1	mPAS	protein_coding		324	0.00365135	0.0120087	0.00393624	0.0322474	0.00508611	0.00508611	0.164243	0.3632	0.164695	0.617965	0.209766	0.209766	12	8.30493	6.48384	6.51347	6.92218	8.47225	7.33933	57.3467	57.3467	57.3467	57.3467	57.3467	25.2222	30.4863	30.8133	32.2191	24.4805	28.6443	0.43982	0.531614	0.537317	0.56183	0.426885	0.499493
469561	Matk	7	-	8456985	8457017	32	8456990	2	mPAS	protein_coding		13480	0.00731663	0.00947767	0.0182559	0.00150641	0.0204213	0.00947767	0.246557	0.314835	0.417224	0.107457	0.477908	0.314835	12	3.00388	4.45308	4.53963	4.37727	3.3082	3.93641	2506.56	2506.56	2506.56	2506.56	2506.56	423.986	325.049	296.801	353.433	415.575	362.969	0.16915	0.129679	0.11841	0.141003	0.165795	0.144807
366347	Cadps2	4	-	51797163	51797164	1	51797164	5		protein_coding		185	0.0146371	0.0107661	0.0122126	0.00254032	0.0169738	0.0122126	0.372758	0.341475	0.331482	0.146678	0.429714	0.341475	12	10.8862	0.484874	0.480633	10.4711	0.34001	4.53255	33.9128	33.9128	33.9128	33.9128	33.9128	18.0363	12.0831	12.0743	16.766	13.0477	14.4015	0.531843	0.3563	0.356041	0.494386	0.384743	0.424663
350825	-	3	+	105463623	105463624	1	105463623				-	168	0.0112722	0.0124286	0.0109108	0.0122421	0.0103592	0.0112722	0.321628	0.372348	0.309646	0.363963	0.321141	0.321628	12	9.9183	10.6168	10.2863	9.79135	9.53121	10.0288	29.6509	29.6509	29.6509	29.6509	29.6509	32.1543	29.8593	31.3557	31.5236	32.6266	31.5039	1.08443	1.00703	1.05749	1.06316	1.10036	1.06249
55796	Coro1b	1	+	201448408	201448419	11	201448410	1	mPAS	protein_coding	XM_006230774.4	3652	0.0095455	0.0104804	0.0120994	0.0130091	0.0121049	0.0120994	0.292321	0.337551	0.32982	0.37401	0.352676	0.337551	12	3.02693	6.10057	4.86806	3.43801	3.0593	4.09857	675.81	675.81	675.81	675.81	675.81	157.972	74.8297	156.989	173.623	165.35	145.753	0.233753	0.110726	0.232298	0.25691	0.244669	0.215671
487035	Cyp4f5	7	+	11559407	11559454	47	11559408	2		protein_coding		30	0.00757175	0.0168164	0.00959257	0.0120638	0.0115459	0.0115459	0.249564	0.445049	0.287997	0.360405	0.342356	0.342356	12	0.126545	0.083735	10.0868	0.46383	10.0165	4.15549	4.4508	4.4508	4.4508	4.4508	4.4508	4.03388	4.1705	7.75994	2.81993	7.7554	5.30793	0.906328	0.937023	1.74349	0.633578	1.74248	1.19258
525326	Myo1e	8	+	71080174	71080188	14	71080176	2	mPAS	protein_coding	XM_039080888.1	707	0.00360049	0.00882795	0.00789243	0.007286	0.0304622	0.00789243	0.162416	0.299891	0.255234	0.278308	0.590814	0.278308	12	4.17192	4.3641	4.22677	5.55538	6.28922	4.92148	133.391	133.391	133.391	133.391	133.391	34.0225	35.0326	35.541	29.176	19.4389	30.6422	0.255059	0.262632	0.266443	0.218726	0.145729	0.229718
81919	LOC103693257	10	+	983173	983187	14	983173	1		protein_coding		103	0.0174884	0.00656525	0.0162368	0.00985673	0.00800501	0.00985673	0.407469	0.248502	0.392116	0.325563	0.279357	0.325563	12	0.0551506	11.2741	10.9628	11.0108	11.3264	8.92583	17.9765	17.9765	17.9765	17.9765	17.9765	12.1854	13.1191	12.6577	12.9197	13.0239	12.7811	0.67785	0.729788	0.704123	0.718699	0.724492	0.71099
390172	Plekha8	4	+	83774059	83774085	26	83774060	2	mPAS	protein_coding		152	0.011812	0.00521544	0.0176276	0.0176932	0.00596429	0.011812	0.330496	0.218359	0.409311	0.445232	0.233328	0.330496	12	1.04759	1.29198	0.457063	1.61946	0.443543	0.971926	26.5875	26.5875	26.5875	26.5875	26.5875	15.5947	15.7054	15.3978	14.4775	15.4375	15.3226	0.586542	0.590707	0.579138	0.544523	0.58063	0.576308
153246	Mapk10	14	-	6510716	6510717	1	6510716	10		protein_coding	XM_017599084.2	25	0.013331	0.00909661	0.0133011	0.0108453	0.0118006	0.0118006	0.350849	0.306018	0.351708	0.342016	0.347929	0.347929	12	7.74884	11.7121	11.902	9.89982	11.2012	10.4928	4.54808	4.54808	4.54808	4.54808	4.54808	3.60882	3.00303	2.38209	6.73515	4.50882	4.04758	0.793483	0.660287	0.523758	1.48088	0.991369	0.889955
121442	LOC120095951	12	-	29863775	29863781	6	29863776	1		lncRNA		972	0.00462545	0.00932284	0.00856127	0.0249201	0.0110719	0.00932284	0.189536	0.311648	0.266811	0.547674	0.333914	0.311648	12	5.94676	5.38338	6.23003	4.31102	5.71959	5.51816	168.9	168.9	168.9	168.9	168.9	68.0621	79.7533	59.9667	82.5829	73.5977	72.7925	0.402974	0.472194	0.355044	0.488947	0.435749	0.430981
71634	Acadvl	10	-	54732864	54732884	20	54732871	1	mPAS	protein_coding		1317	0.01606	0.00704125	0.0114647	0.0108075	0.01324	0.0114647	0.388432	0.261225	0.320214	0.342016	0.370536	0.342016	12	5.4266	4.60306	6.4834	6.39701	5.71706	5.72543	241.627	241.627	241.627	241.627	241.627	63.4625	59.8949	48.5667	50.1058	60.9997	56.6059	0.262646	0.247881	0.200999	0.207368	0.252454	0.23427
61705	Sorcs3	1	+	247732736	247732752	16	247732737	3		protein_coding		66	0.0131789	0.00470769	0.0175132	0.00691689	0.0165013	0.0131789	0.348768	0.207642	0.4086	0.270654	0.421607	0.348768	12	8.52065	10.2922	9.69637	8.69782	9.48273	9.33795	11.0418	11.0418	11.0418	11.0418	11.0418	11.5063	8.11133	10.5113	11.2805	10.8687	10.4556	1.04207	0.734601	0.95195	1.02162	0.984325	0.946912
467967	Jag2	6	+	131998941	131998996	55	131998974	3		protein_coding	NM_001375303.1	1983	0.0249441	0.00597081	0.0129721	0.00519103	0.00979364	0.00979364	0.494168	0.235577	0.346764	0.227382	0.311956	0.311956	12	11.7656	10.6734	0.166672	10.6612	9.95391	8.64415	346.453	346.453	346.453	346.453	346.453	131.306	194.004	94.2689	198.811	214.15	166.508	0.379002	0.559971	0.272097	0.573848	0.618121	0.480608
94310	Cdk12	10	+	83254643	83254651	8	83254651	2		protein_coding		108	0.0176111	0.0238722	0.00696605	0.00586265	0.00480135	0.00696605	0.409426	0.543462	0.236173	0.24627	0.201956	0.24627	12	9.64061	8.70181	9.81119	10.5241	10.711	9.87774	17.4684	17.4684	17.4684	17.4684	17.4684	12.7506	11.8421	12.3825	10.9218	10.206	11.6206	0.729926	0.677915	0.708855	0.625231	0.584254	0.665236
69098	-	10	-	37681701	37681709	8	37681709				-	89	0.0125717	0.0158228	0.00961688	0.00531972	0.0157892	0.0125717	0.340649	0.426557	0.288388	0.231306	0.410997	0.340649	12	6.4931	6.42811	6.65712	4.67627	4.68679	5.78828	15.6576	15.6576	15.6576	15.6576	15.6576	9.63471	9.82814	8.89091	10.8776	10.8681	10.0199	0.615338	0.627692	0.567834	0.694716	0.69411	0.639938
412915	Pik3r3	5	-	129742610	129742613	3	129742610	3		protein_coding	XM_039110699.1	85	0.00537052	0.00873187	0.00458905	0.0295586	0.0109961	0.00873187	0.205398	0.299135	0.181714	0.591217	0.332756	0.299135	12	4.4687	2.74342	3.25531	4.40682	3.20314	3.61548	19.3872	19.3872	19.3872	19.3872	19.3872	14.766	17.2241	18.6697	14.1554	18.1611	16.5953	0.761638	0.888429	0.962993	0.730141	0.936758	0.855992
42263	Irf3	1	+	95484915	95484939	24	95484919	1	mPAS	protein_coding		2922	0.00667723	0.0066499	0.00594829	0.0255813	0.0152189	0.00667723	0.23444	0.250736	0.215148	0.555666	0.403427	0.250736	12	6.3431	4.51839	6.38902	4.43832	4.42296	5.22236	519.03	519.03	519.03	519.03	519.03	120.663	161.813	117.13	162.364	160.577	144.509	0.232478	0.31176	0.22567	0.312821	0.30938	0.278422
137468	Ralgps2	13	-	68924920	68924925	5	68924923	2		protein_coding		165	0.0126317	0.00990178	0.0106223	0.00495607	0.0221871	0.0106223	0.340825	0.325896	0.304178	0.222547	0.500068	0.325896	12	5.90427	5.12965	8.13583	7.64746	5.95907	6.55526	29.6846	29.6846	29.6846	29.6846	29.6846	20.8393	17.5607	10.0194	14.1555	20.9073	16.6964	0.702023	0.591575	0.337527	0.476862	0.704313	0.56246
496730	Nptxr	7	+	111340401	111340426	25	111340408	3		protein_coding	NM_030841.3	103	0.00322518	0.0270111	0.0059758	0.0229016	0.00148927	0.0059758	0.152414	0.581948	0.215652	0.523229	0.0977165	0.215652	12	8.4844	8.64555	9.52284	10.2701	10.1191	9.40839	19.0594	19.0594	19.0594	19.0594	19.0594	12.7817	13.0285	13.1399	10.3604	11.5996	12.182	0.670623	0.683572	0.689418	0.543585	0.608603	0.639161
515229	LOC100360828	8	-	110813821	110813893	72	110813892	2		protein_coding	XM_002729972.5	84	0.00772318	0.00597304	0.00649179	0.0306654	0.0099604	0.00772318	0.251554	0.235577	0.227197	0.601136	0.314745	0.251554	12	5.2379	5.12326	4.97602	6.55141	4.69354	5.31643	14.6914	14.6914	14.6914	14.6914	14.6914	15.0182	15.0344	14.7777	10.8507	14.7233	14.0809	1.02224	1.02335	1.00587	0.738579	1.00217	0.958444
532575	Tubb4a	9	-	1917828	1917850	22	1917838	3	mPAS	protein_coding		14526	0.0105765	0.0163204	0.0124806	0.00607404	0.0153721	0.0124806	0.309281	0.437003	0.336458	0.252224	0.406248	0.336458	12	5.41859	3.06772	5.636	3.77534	6.08882	4.79729	2776.11	2776.11	2776.11	2776.11	2776.11	435.086	676.855	371.485	706.101	215.071	480.919	0.156725	0.243814	0.133815	0.254349	0.0774722	0.173235
365877	Gpr85	4	-	42105370	42105376	6	42105373	3		protein_coding		88	0.0192024	0.014451	0.00499299	0.00584983	0.0164121	0.014451	0.430931	0.405047	0.191964	0.24627	0.421341	0.405047	12	6.73047	8.11867	5.42379	6.81026	4.92451	6.40154	18.0276	18.0276	18.0276	18.0276	18.0276	10.6613	4.54121	11.7877	10.4106	10.9502	9.67021	0.591388	0.251902	0.653869	0.57748	0.607413	0.536411
565080	-	X	-	119376980	119376984	4	119376984				-	42151	0.00738412	0.0267541	0.00831166	0.00626563	0.0124478	0.00831166	0.24721	0.577586	0.261261	0.256169	0.359049	0.261261	12	0.112834	11.2742	10.5835	0.447292	10.3266	6.54889	8277.4	8277.4	8277.4	8277.4	8277.4	3961.75	5128.77	5354.87	3332.75	5438.98	4643.42	0.478623	0.619611	0.646926	0.402632	0.657088	0.560976
531360	Mobp	8	+	119895471	119895485	14	119895478	10		protein_coding		3504	0.0122555	0.0119353	0.0164356	0.00660414	0.0139794	0.0122555	0.336817	0.363104	0.394253	0.262838	0.381722	0.363104	12	2.75676	2.56645	2.98695	2.23432	2.72612	2.65412	648.704	648.704	648.704	648.704	648.704	152.413	155.99	152.659	158.221	158.466	155.55	0.23495	0.240463	0.235328	0.243902	0.244281	0.239785
466761	RGD1566401	6	+	128512929	128513144	215	128512965	22		lncRNA		477	0.00715642	0.0048409	0.00795086	0.0316314	0.00968965	0.00795086	0.243089	0.209645	0.255842	0.610817	0.310509	0.255842	12	6.20355	4.82469	4.35444	4.49172	4.36734	4.84835	84.2861	84.2861	84.2861	84.2861	84.2861	39.7793	53.7065	52.1162	53.8926	51.5414	50.2072	0.471955	0.637193	0.618325	0.639401	0.611505	0.595676
574110	Armcx1	X	+	97902862	97902872	10	97902869	1	mPAS	protein_coding		1860	0.0149917	0.00333762	0.0219299	0.0114668	0.00972604	0.0114668	0.375941	0.167226	0.468344	0.352858	0.311361	0.352858	12	5.22518	6.91676	6.865	4.96267	6.87417	6.16875	347.155	347.155	347.155	347.155	347.155	69.4613	61.6779	62.8658	64.8722	62.6034	64.2961	0.200087	0.177667	0.181089	0.186868	0.180333	0.185209
165079	Grsf1	14	+	19429352	19429371	19	19429363	2	mPAS	protein_coding	XM_039091873.1	502	0.00660389	0.0242424	0.00337061	0.0081488	0.0190941	0.0081488	0.233022	0.545618	0.152915	0.294859	0.459577	0.294859	12	0.21228	10.8896	11.1803	10.7114	11.9515	8.98901	88.8561	88.8561	88.8561	88.8561	88.8561	13.9653	26.0038	24.199	27.05	17.0786	21.6593	0.157168	0.292651	0.27234	0.304425	0.192205	0.243758
50864	Tub	1	+	163010355	163010360	5	163010357	3		protein_coding		76	0.0217345	0.00527031	0.0140141	0.00689567	0.0138447	0.0138447	0.459427	0.219933	0.363007	0.270654	0.380142	0.363007	12	8.08706	8.25518	6.27691	6.26405	8.10204	7.39705	12.4241	12.4241	12.4241	12.4241	12.4241	11.0126	9.67207	14.5566	14.467	11.09	12.1597	0.88639	0.77849	1.17164	1.16442	0.892615	0.978712
361223	-	4	-	5949851	5949852	1	5949852				-	559	0.0124652	0.0251359	0.00703089	0.0115093	0.00568488	0.0115093	0.339336	0.556161	0.237532	0.353057	0.225761	0.339336	12	11.9833	9.7754	0.11831	10.3018	9.32947	8.30165	103.267	103.267	103.267	103.267	103.267	24.1646	51.0864	20.9736	49.0047	50.8906	39.224	0.234001	0.494702	0.2031	0.474544	0.492806	0.379831
24800	Rce1	1	-	201926925	201926973	48	201926943	3		protein_coding		797	0.0147807	0.0176498	0.0174253	0.00402722	0.00830496	0.0147807	0.374912	0.460337	0.408395	0.195554	0.285717	0.374912	12	8.02688	9.43635	9.4926	9.89195	8.60216	9.08999	142.702	142.702	142.702	142.702	142.702	64.7544	53.6824	51.9296	45.3187	65.1558	56.1682	0.453773	0.376185	0.363901	0.317575	0.456585	0.393604
335799	-	3	-	136383782	136383782	0	136383782				-	32	0.0138411	0.015867	0.011582	0.00786271	0.013055	0.013055	0.359404	0.427386	0.32123	0.289767	0.367542	0.359404	12	4.69991	7.01478	8.44272	6.39582	4.45924	6.20249	7.13697	7.13697	7.13697	7.13697	7.13697	9.57119	8.00909	0.809598	9.84179	8.84057	7.41445	1.34107	1.1222	0.113437	1.37899	1.2387	1.03888
470149	Bsg	7	-	9993149	9993176	27	9993171	1	mPAS	protein_coding		4071	0.0229147	0.0137472	0.0105619	0.00564488	0.00934519	0.0105619	0.469788	0.391542	0.303268	0.240623	0.304413	0.304413	12	11.8089	10.9615	9.80166	9.84191	9.81874	10.4466	707.696	707.696	707.696	707.696	707.696	167.515	267.48	302.684	322.882	304.49	273.01	0.236705	0.377958	0.427704	0.456243	0.430255	0.385773
210972	Plekha2	16	+	67000445	67000449	4	67000449	3		protein_coding		162	0.0227608	0.00815936	0.017975	0.00551232	0.0078353	0.00815936	0.469032	0.288027	0.413646	0.236561	0.277473	0.288027	12	0.171277	1.45544	0.194958	0.232352	0.286619	0.46813	29.5818	29.5818	29.5818	29.5818	29.5818	19.2666	15.9819	19.2592	19.4237	19.3417	18.6546	0.6513	0.540263	0.651049	0.656611	0.653837	0.630612
299932	Hdgf	2	+	173379349	173379386	37	173379367	3		protein_coding		4462	0.0221474	0.0106407	0.00935968	0.0102853	0.00986005	0.0102853	0.465088	0.339666	0.284708	0.332278	0.313126	0.332278	12	5.61463	4.75634	6.8432	4.89795	5.11669	5.44576	842.204	842.204	842.204	842.204	842.204	112.108	103.938	91.5821	104.248	109.035	104.182	0.133112	0.123412	0.108741	0.123781	0.129464	0.123702
75822	-	10	-	77140089	77140089	0	77140089				-	56	0.005062	0.0085703	0.0128001	0.0279403	0.00799673	0.0085703	0.199943	0.296242	0.342744	0.573932	0.279357	0.296242	12	4.52266	3.80921	2.77151	3.75636	2.70744	3.51343	9.30395	9.30395	9.30395	9.30395	9.30395	8.27986	9.68053	9.60609	9.35698	9.45327	9.27535	0.889929	1.04048	1.03247	1.0057	1.01605	0.996925
424912	Gne	5	+	58301066	58301067	1	58301066	3		protein_coding	XR_005504354.1	114	0.0163141	0.00570335	0.00801713	0.00999761	0.0223455	0.00999761	0.391304	0.230358	0.256205	0.32799	0.501929	0.32799	12	11.098	10.4591	11.336	0.313748	11.6802	8.9774	20.7923	20.7923	20.7923	20.7923	20.7923	13.4611	12.6932	13.1058	9.20752	12.1233	12.1182	0.647409	0.610478	0.63032	0.442834	0.583066	0.582821
333988	RGD1565616	3	-	117920005	117920018	13	117920013	6		protein_coding		3463	0.00280481	0.00608124	0.00516569	0.027242	0.0211161	0.00608124	0.138526	0.237251	0.195847	0.568039	0.486635	0.237251	12	6.82916	6.10732	6.40565	8.13601	6.86399	6.86842	645.373	645.373	645.373	645.373	645.373	127.07	143.744	139.034	54.6854	121.261	117.159	0.196894	0.22273	0.215432	0.0847346	0.187893	0.181537
486432	Atcay	7	+	8513025	8513048	23	8513029	5		protein_coding		1561	0.00888627	0.00892138	0.00809556	0.0145698	0.0220075	0.00892138	0.278758	0.302365	0.257091	0.399923	0.498141	0.302365	12	4.37239	5.79557	6.05017	3.89367	5.82486	5.18733	282.82	282.82	282.82	282.82	282.82	66.9792	57.9051	52.6372	62.8116	57.4525	59.5571	0.236826	0.204742	0.186115	0.22209	0.203141	0.210583
[truncated: 481 more rows]
